# Supplementary material for: A comprehensive transcriptomic analysis of differentiating embryonic stem cells in response to the overexpression of Mesogenin 1
Source: publisher site journal article supplement (doi:10.18632/aging.101049), 2016-10-06
Supplement: Supplementary file 1 [file aging-v8i10-101049-supplementary-material-SD1.xls]

## Sheet: 12up
Pathways	Map A	Map B	The number of genes	pvals	The number of TFs
Cell cycle	Cellular Processes	Cell growth and death	120	<0.001	31
Oocyte meiosis	Cellular Processes	Cell growth and death	105	<0.001	27
p53 signaling pathway	Cellular Processes	Cell growth and death	65	<0.001	25
Regulation of autophagy	Cellular Processes	Transport and catabolism	28	<0.001	25
Lysosome	Cellular Processes	Transport and catabolism	119	0.046	28
Peroxisome	Cellular Processes	Transport and catabolism	79	<0.001	22
MAPK signaling pathway	Environmental Information Processing	Signal transduction	258	0.046	27
ErbB signaling pathway	Environmental Information Processing	Signal transduction	86	<0.001	40
Phosphatidylinositol signaling system	Environmental Information Processing	Signal transduction	73	<0.001	26
VEGF signaling pathway	Environmental Information Processing	Signal transduction	74	0.046	27
Aminoacyl-tRNA biosynthesis	Genetic Information Processing	Translation	41	<0.001	10
Ribosome biogenesis in eukaryotes	Genetic Information Processing	Translation	63	<0.001	28
RNA transport	Genetic Information Processing	Translation	142	<0.001	30
mRNA surveillance pathway	Genetic Information Processing	Translation	81	<0.001	35
RNA degradation	Genetic Information Processing	Folding, sorting and degradation	66	<0.001	22
RNA polymerase	Genetic Information Processing	Transcription	24	<0.001	29
Basal transcription factors	Genetic Information Processing	Transcription	32	<0.001	24
DNA replication	Genetic Information Processing	Replication and repair	35	<0.001	23
Spliceosome	Genetic Information Processing	Transcription	115	<0.001	26
Proteasome	Genetic Information Processing	Folding, sorting and degradation	44	<0.001	20
Base excision repair	Genetic Information Processing	Replication and repair	30	0.046	14
Nucleotide excision repair	Genetic Information Processing	Replication and repair	43	<0.001	31
Mismatch repair	Genetic Information Processing	Replication and repair	22	<0.001	18
Homologous recombination	Genetic Information Processing	Replication and repair	27	0.046	17
Non-homologous end-joining	Genetic Information Processing	Replication and repair	12	<0.001	19
Ubiquitin mediated proteolysis	Genetic Information Processing	Folding, sorting and degradation	130	<0.001	35
Protein processing in endoplasmic reticulum	Genetic Information Processing	Folding, sorting and degradation	160	<0.001	19
Metabolic pathways	Global Map	Metabolism	1061	<0.001	16
Amyotrophic lateral sclerosis (ALS)	Human Diseases	Neurodegenerative diseases	54	<0.001	31
Huntington's disease	Human Diseases	Neurodegenerative diseases	156	<0.001	23
Bacterial invasion of epithelial cells	Human Diseases	Infectious diseases: Bacterial	67	<0.001	50
Hepatitis C	Human Diseases	Infectious diseases: Viral	127	<0.001	26
Prostate cancer	Human Diseases	Cancers	88	0.046	45
Thyroid cancer	Human Diseases	Cancers	29	<0.001	13
Acute myeloid leukemia	Human Diseases	Cancers	57	0.046	35
Glycolysis / Gluconeogenesis	Metabolism	Carbohydrate metabolism	57	0.046	14
Citrate cycle (TCA cycle)	Metabolism	Carbohydrate metabolism	30	<0.001	16
Pentose and glucuronate interconversions	Metabolism	Carbohydrate metabolism	19	<0.001	22
Fructose and mannose metabolism	Metabolism	Carbohydrate metabolism	36	<0.001	20
Galactose metabolism	Metabolism	Carbohydrate metabolism	27	<0.001	19
Fatty acid metabolism	Metabolism	Lipid metabolism	41	0.046	15
Steroid biosynthesis	Metabolism	Lipid metabolism	18	<0.001	17
Steroid hormone biosynthesis	Metabolism	Lipid metabolism	41	<0.001	19
Purine metabolism	Metabolism	Nucleotide metabolism	152	<0.001	24
Pyrimidine metabolism	Metabolism	Nucleotide metabolism	89	<0.001	23
Alanine, aspartate and glutamate metabolism	Metabolism	Amino acid metabolism	32	<0.001	22
Glycine, serine and threonine metabolism	Metabolism	Amino acid metabolism	30	<0.001	20
Cysteine and methionine metabolism	Metabolism	Amino acid metabolism	35	<0.001	11
Valine, leucine and isoleucine degradation	Metabolism	Amino acid metabolism	48	<0.001	20
Valine, leucine and isoleucine biosynthesis	Metabolism	Amino acid metabolism	12	<0.001	19
Lysine degradation	Metabolism	Amino acid metabolism	43	<0.001	26
Arginine and proline metabolism	Metabolism	Amino acid metabolism	53	<0.001	21
Histidine metabolism	Metabolism	Amino acid metabolism	26	<0.001	21
Tyrosine metabolism	Metabolism	Amino acid metabolism	34	<0.001	22
Phenylalanine metabolism	Metabolism	Amino acid metabolism	16	0.044	18
Tryptophan metabolism	Metabolism	Amino acid metabolism	40	<0.001	32
Selenocompound metabolism	Metabolism	Metabolism of other amino acids	17	<0.001	20
Other types of O-glycan biosynthesis	Metabolism	Glycan biosynthesis and metabolism	32	0.038	18
Inositol phosphate metabolism	Metabolism	Carbohydrate metabolism	56	<0.001	27
Ether lipid metabolism	Metabolism	Lipid metabolism	35	<0.001	21
Pyruvate metabolism	Metabolism	Carbohydrate metabolism	40	<0.001	29
Propanoate metabolism	Metabolism	Carbohydrate metabolism	29	<0.001	23
One carbon pool by folate	Metabolism	Metabolism of cofactors and vitamins	17	<0.001	26
Nicotinate and nicotinamide metabolism	Metabolism	Metabolism of cofactors and vitamins	23	<0.001	23
Pantothenate and CoA biosynthesis	Metabolism	Metabolism of cofactors and vitamins	15	<0.001	19
Chemokine signaling pathway	Organismal Systems	Immune system	168	0.046	24
Cardiac muscle contraction	Organismal Systems	Circulatory system	66	<0.001	26
Antigen processing and presentation	Organismal Systems	Immune system	57	<0.001	15
Toll-like receptor signaling pathway	Organismal Systems	Immune system	93	<0.001	30
NOD-like receptor signaling pathway	Organismal Systems	Immune system	50	<0.001	14
RIG-I-like receptor signaling pathway	Organismal Systems	Immune system	58	<0.001	21
Cytosolic DNA-sensing pathway	Organismal Systems	Immune system	47	<0.001	23
T cell receptor signaling pathway	Organismal Systems	Immune system	106	<0.001	33
Fc epsilon RI signaling pathway	Organismal Systems	Immune system	77	<0.001	36
Fc gamma R-mediated phagocytosis	Organismal Systems	Immune system	86	<0.001	23
Neurotrophin signaling pathway	Organismal Systems	Nervous system	124	<0.001	29
Phototransduction	Organismal Systems	Sensory system	21	0.046	15
Progesterone-mediated oocyte maturation	Organismal Systems	Endocrine system	85	<0.001	41
Proximal tubule bicarbonate reclamation	Organismal Systems	Excretory system	20	<0.001	21
Collecting duct acid secretion	Organismal Systems	Excretory system	26	<0.001	27
Gastric acid secretion	Organismal Systems	Digestive system	69	<0.001	27
Bile secretion	Organismal Systems	Digestive system	70	<0.001	24

## Sheet: 12down
Pathways	Map A	Map B	The number of genes	pvals	The number of TFs
Mucin type O-Glycan biosynthesis	Metabolism	Glycan biosynthesis and metabolism	25	<0.001	22
Folate biosynthesis	Metabolism	Metabolism of cofactors and vitamins	11	<0.001	28
Drug metabolism - other enzymes	Metabolism	Xenobiotics biodegradation and metabolism	39	<0.001	25
Ribosome	Genetic Information Processing	Translation	53	<0.001	25
Calcium signaling pathway	Environmental Information Processing	Signal transduction	166	<0.001	20
Cytokine-cytokine receptor interaction	Environmental Information Processing	Signaling molecules and interaction	218	<0.001	34
Notch signaling pathway	Environmental Information Processing	Signal transduction	45	<0.001	34
Hedgehog signaling pathway	Environmental Information Processing	Signal transduction	54	<0.001	44
Cell adhesion molecules (CAMs)	Environmental Information Processing	Signaling molecules and interaction	128	<0.001	38
Complement and coagulation cascades	Organismal Systems	Immune system	67	<0.001	17
Melanogenesis	Organismal Systems	Endocrine system	95	<0.001	31
Fat digestion and absorption	Organismal Systems	Digestive system	43	<0.001	25
Prion diseases	Human Diseases	Neurodegenerative diseases	34	<0.001	29
African trypanosomiasis	Human Diseases	Infectious diseases: Parasitic	30	<0.001	19
Malaria	Human Diseases	Infectious diseases: Parasitic	43	<0.001	25
Arrhythmogenic right ventricular cardiomyopathy (ARVC)	Human Diseases	Cardiovascular diseases	73	<0.001	43

## Sheet: 24up
Pathways	Map A	Map B	The number of genes	pvals	The number of TFs
p53 signaling pathway	Cellular Processes	Cell growth and death	65	<0.001	25
Phagosome	Cellular Processes	Transport and catabolism	139	<0.001	30
Ribosome biogenesis in eukaryotes	Genetic Information Processing	Translation	70	<0.001	18
RNA transport	Genetic Information Processing	Translation	142	<0.001	21
mRNA surveillance pathway	Genetic Information Processing	Translation	81	0.044	42
RNA polymerase	Genetic Information Processing	Transcription	24	<0.001	29
Spliceosome	Genetic Information Processing	Transcription	115	<0.001	30
Proteasome	Genetic Information Processing	Folding, sorting and degradation	44	<0.001	20
Ubiquitin mediated proteolysis	Genetic Information Processing	Folding, sorting and degradation	130	<0.001	35
Staphylococcus aureus infection	Human Diseases	Infectious diseases: Bacterial	44	<0.001	18
Autoimmune thyroid disease	Human Diseases	Immune diseases	41	<0.001	20
Allograft rejection	Human Diseases	Immune diseases	33	<0.001	25
Graft-versus-host disease	Human Diseases	Immune diseases		<0.001	15
Steroid hormone biosynthesis	Metabolism	Lipid metabolism	41	0.046	19
Pyrimidine metabolism	Metabolism	Nucleotide metabolism	89	0.038	23
Glycine, serine and threonine metabolism	Metabolism	Amino acid metabolism	30	<0.001	20
Cysteine and methionine metabolism	Metabolism	Amino acid metabolism	33	<0.001	13
Lysine degradation	Metabolism	Amino acid metabolism	43	<0.001	26
Phenylalanine metabolism	Metabolism	Amino acid metabolism	16	<0.001	18
Tryptophan metabolism	Metabolism	Amino acid metabolism	40	<0.001	32
Inositol phosphate metabolism	Metabolism	Carbohydrate metabolism	56	<0.001	27
Glycerophospholipid metabolism	Metabolism	Lipid metabolism	78	<0.001	16
Ether lipid metabolism	Metabolism	Lipid metabolism	35	<0.001	21
One carbon pool by folate	Metabolism	Metabolism of cofactors and vitamins	17	<0.001	26
Pantothenate and CoA biosynthesis	Metabolism	Metabolism of cofactors and vitamins	15	<0.001	19
PPAR signaling pathway	Organismal Systems	Endocrine system	71	<0.001	25
Antigen processing and presentation	Organismal Systems	Immune system	57	<0.001	15
RIG-I-like receptor signaling pathway	Organismal Systems	Immune system	58	<0.001	19
Collecting duct acid secretion	Organismal Systems	Excretory system	26	<0.001	27

## Sheet: 24down
Pathways	Map A	Map B	The number of genes	pvals	The number of TFs
Cell cycle	Cellular Processes	Cell growth and death	119	<0.001	37
Oocyte meiosis	Cellular Processes	Cell growth and death	105	<0.001	27
Endocytosis	Cellular Processes	Transport and catabolism	197	<0.001	32
Apoptosis	Cellular Processes	Cell growth and death	84	<0.001	26
Focal adhesion	Cellular Processes	Cell communication	195	<0.001	32
Adherens junction	Cellular Processes	Cell communication	71	<0.001	31
Tight junction	Cellular Processes	Cell communication	127	<0.001	34
Gap junction	Cellular Processes	Cell communication	80	<0.001	31
Regulation of actin cytoskeleton	Cellular Processes	Cell motility	206	<0.001	23
MAPK signaling pathway	Environmental Information Processing	Signal transduction	256	<0.001	21
ErbB signaling pathway	Environmental Information Processing	Signal transduction	86	<0.001	40
Calcium signaling pathway	Environmental Information Processing	Signal transduction	166	<0.001	31
Cytokine-cytokine receptor interaction	Environmental Information Processing	Signaling molecules and interaction	218	<0.001	34
mTOR signaling pathway	Environmental Information Processing	Signal transduction	52	<0.001	30
Wnt signaling pathway	Environmental Information Processing	Signal transduction	146	<0.001	35
Notch signaling pathway	Environmental Information Processing	Signal transduction	45	<0.001	34
Hedgehog signaling pathway	Environmental Information Processing	Signal transduction	54	<0.001	33
TGF-beta signaling pathway	Environmental Information Processing	Signal transduction	81	<0.001	44
ECM-receptor interaction	Environmental Information Processing	Signaling molecules and interaction	83	<0.001	34
Ribosome	Genetic Information Processing	Translation	53	<0.001	18
Protein export	Genetic Information Processing	Folding, sorting and degradation	18	<0.001	23
Alzheimer's disease	Human Diseases	Neurodegenerative diseases	147	<0.001	26
Parkinson's disease	Human Diseases	Neurodegenerative diseases	104	<0.001	18
Chagas disease (American trypanosomiasis)	Human Diseases	Infectious diseases: Parasitic	99	<0.001	35
African trypanosomiasis	Human Diseases	Infectious diseases: Parasitic	30	<0.001	19
Malaria	Human Diseases	Infectious diseases: Parasitic	43	<0.001	25
Toxoplasmosis	Human Diseases	Infectious diseases: Parasitic	123	<0.001	22
Amoebiasis	Human Diseases	Infectious diseases: Parasitic	107	<0.001	34
Hepatitis C	Human Diseases	Infectious diseases: Viral	127	<0.001	37
Pathways in cancer	Human Diseases	Cancers	316	<0.001	30
Colorectal cancer	Human Diseases	Cancers	64	<0.001	28
Renal cell carcinoma	Human Diseases	Cancers	70	<0.001	30
Pancreatic cancer	Human Diseases	Cancers	69	<0.001	41
Endometrial cancer	Human Diseases	Cancers	52	<0.001	27
Glioma	Human Diseases	Cancers	59	<0.001	29
Prostate cancer	Human Diseases	Cancers	88	<0.001	34
Thyroid cancer	Human Diseases	Cancers	29	<0.001	12
Basal cell carcinoma	Human Diseases	Cancers	55	<0.001	27
Melanoma	Human Diseases	Cancers	69	<0.001	36
Bladder cancer	Human Diseases	Cancers	40	<0.001	8
Chronic myeloid leukemia	Human Diseases	Cancers	71	<0.001	30
Acute myeloid leukemia	Human Diseases	Cancers	57	<0.001	33
Small cell lung cancer	Human Diseases	Cancers	83	<0.001	43
Non-small cell lung cancer	Human Diseases	Cancers	53	<0.001	27
Primary immunodeficiency	Human Diseases	Immune diseases	33	<0.001	18
Hypertrophic cardiomyopathy (HCM)	Human Diseases	Cardiovascular diseases	81	0.038	32
Dilated cardiomyopathy	Human Diseases	Cardiovascular diseases	87	<0.001	38
Citrate cycle (TCA cycle)	Metabolism	Carbohydrate metabolism	30	<0.001	16
Alanine, aspartate and glutamate metabolism	Metabolism	Amino acid metabolism	31	<0.001	22
beta-Alanine metabolism	Metabolism	Metabolism of other amino acids	21	0.040	20
Starch and sucrose metabolism	Metabolism	Carbohydrate metabolism	32	<0.001	12
N-Glycan biosynthesis	Metabolism	Glycan biosynthesis and metabolism	49	<0.001	14
Mucin type O-Glycan biosynthesis	Metabolism	Glycan biosynthesis and metabolism	25	<0.001	22
Other types of O-glycan biosynthesis	Metabolism	Glycan biosynthesis and metabolism	32	<0.001	18
Amino sugar and nucleotide sugar metabolism	Metabolism	Carbohydrate metabolism	48	<0.001	20
Sphingolipid metabolism	Metabolism	Lipid metabolism	39	<0.001	26
Glycosphingolipid biosynthesis - lacto and neolacto series	Metabolism	Glycan biosynthesis and metabolism	24	<0.001	36
Glycosphingolipid biosynthesis - globo series	Metabolism	Glycan biosynthesis and metabolism	15	<0.001	19
Glycosphingolipid biosynthesis - ganglio series	Metabolism	Glycan biosynthesis and metabolism	15	<0.001	19
Glyoxylate and dicarboxylate metabolism	Metabolism	Carbohydrate metabolism	18	0.044	30
Butanoate metabolism	Metabolism	Carbohydrate metabolism	27	<0.001	22
Terpenoid backbone biosynthesis	Metabolism	Metabolism of terpenoids and polyketides	13	0.044	26
Drug metabolism - other enzymes	Metabolism	Xenobiotics biodegradation and metabolism	53	<0.001	25
Chemokine signaling pathway	Organismal Systems	Immune system	168	<0.001	24
Cardiac muscle contraction	Organismal Systems	Circulatory system	66	0.038	26
Vascular smooth muscle contraction	Organismal Systems	Circulatory system	110	<0.001	25
Dorso-ventral axis formation	Organismal Systems	Development	22	<0.001	24
Axon guidance	Organismal Systems	Development	129	<0.001	32
Osteoclast differentiation	Organismal Systems	Development	112	<0.001	30
Complement and coagulation cascades	Organismal Systems	Immune system	67	<0.001	17
Natural killer cell mediated cytotoxicity	Organismal Systems	Immune system	105	<0.001	35
T cell receptor signaling pathway	Organismal Systems	Immune system	106	0.044	34
Leukocyte transendothelial migration	Organismal Systems	Immune system	115	<0.001	26
Long-term potentiation	Organismal Systems	Nervous system	63	<0.001	27
Neurotrophin signaling pathway	Organismal Systems	Nervous system	124	<0.001	32
Long-term depression	Organismal Systems	Nervous system	68	<0.001	31
Insulin signaling pathway	Organismal Systems	Endocrine system	130	<0.001	25
GnRH signaling pathway	Organismal Systems	Endocrine system	93	<0.001	29
Progesterone-mediated oocyte maturation	Organismal Systems	Endocrine system	85	<0.001	40
Melanogenesis	Organismal Systems	Endocrine system	95	<0.001	40
Adipocytokine signaling pathway	Organismal Systems	Endocrine system	63	<0.001	25
Proximal tubule bicarbonate reclamation	Organismal Systems	Excretory system	20	<0.001	21
Salivary secretion	Organismal Systems	Digestive system	70	<0.001	51
Gastric acid secretion	Organismal Systems	Digestive system	69	<0.001	27

## Sheet: 48up
Pathways	Map A	Map B	The number of genes	pvals	The number of TFs
Phagosome	Cellular Processes	Transport and catabolism	134	0.038	30
Peroxisome	Cellular Processes	Transport and catabolism	79	<0.001	20
Tight junction	Cellular Processes	Cell communication	127	<0.001	34
Phosphatidylinositol signaling system	Environmental Information Processing	Signal transduction	73	<0.001	26
Notch signaling pathway	Environmental Information Processing	Signal transduction	45	<0.001	34
Ribosome biogenesis in eukaryotes	Genetic Information Processing	Translation	70	<0.001	18
RNA transport	Genetic Information Processing	Translation	142	<0.001	23
mRNA surveillance pathway	Genetic Information Processing	Translation	81	<0.001	42
RNA degradation	Genetic Information Processing	Folding, sorting and degradation	66	<0.001	23
Basal transcription factors	Genetic Information Processing	Transcription	32	<0.001	24
DNA replication	Genetic Information Processing	Replication and repair	35	<0.001	23
Spliceosome	Genetic Information Processing	Transcription	115	<0.001	30
Proteasome	Genetic Information Processing	Folding, sorting and degradation	44	<0.001	20
Nucleotide excision repair	Genetic Information Processing	Replication and repair	43	<0.001	31
Mismatch repair	Genetic Information Processing	Replication and repair	22	<0.001	18
Homologous recombination	Genetic Information Processing	Replication and repair	27	<0.001	17
Non-homologous end-joining	Genetic Information Processing	Replication and repair	12	<0.001	19
Ubiquitin mediated proteolysis	Genetic Information Processing	Folding, sorting and degradation	130	<0.001	37
Maturity onset diabetes of the young	Human Diseases	Endocrine and metabolic diseases	25	<0.001	25
Glycolysis / Gluconeogenesis	Metabolism	Carbohydrate metabolism	57	<0.001	20
Fructose and mannose metabolism	Metabolism	Carbohydrate metabolism	36	0.038	20
Ascorbate and aldarate metabolism	Metabolism	Carbohydrate metabolism	14	<0.001	26
Fatty acid metabolism	Metabolism	Lipid metabolism	41	<0.001	15
Glycine, serine and threonine metabolism	Metabolism	Amino acid metabolism	30	<0.001	20
Cysteine and methionine metabolism	Metabolism	Amino acid metabolism	35	<0.001	11
Valine, leucine and isoleucine degradation	Metabolism	Amino acid metabolism	46	<0.001	20
Lysine degradation	Metabolism	Amino acid metabolism	43	<0.001	26
Histidine metabolism	Metabolism	Amino acid metabolism	26	<0.001	23
Phenylalanine metabolism	Metabolism	Amino acid metabolism	16	<0.001	18
Tryptophan metabolism	Metabolism	Amino acid metabolism	40	<0.001	32
Other glycan degradation	Metabolism	Glycan biosynthesis and metabolism	16	<0.001	13
Glycosaminoglycan biosynthesis - keratan sulfate	Metabolism	Glycan biosynthesis and metabolism	14	<0.001	23
Inositol phosphate metabolism	Metabolism	Carbohydrate metabolism	56	<0.001	27
Linoleic acid metabolism	Metabolism	Lipid metabolism	40	<0.001	13
alpha-Linolenic acid metabolism	Metabolism	Lipid metabolism	19	<0.001	20
Glycosphingolipid biosynthesis - globo series	Metabolism	Glycan biosynthesis and metabolism	15	<0.001	19
Pyruvate metabolism	Metabolism	Carbohydrate metabolism	40	<0.001	29
Propanoate metabolism	Metabolism	Carbohydrate metabolism	29	<0.001	23
One carbon pool by folate	Metabolism	Metabolism of cofactors and vitamins	17	<0.001	26
Nicotinate and nicotinamide metabolism	Metabolism	Metabolism of cofactors and vitamins	23	<0.001	23
Pantothenate and CoA biosynthesis	Metabolism	Metabolism of cofactors and vitamins	15	<0.001	19
Folate biosynthesis	Metabolism	Metabolism of cofactors and vitamins	11	<0.001	28
Metabolism of xenobiotics by cytochrome P450	Metabolism	Xenobiotics biodegradation and metabolism	59	<0.001	15
Drug metabolism - cytochrome P450	Metabolism	Xenobiotics biodegradation and metabolism	67	<0.001	13
Antigen processing and presentation	Organismal Systems	Immune system	57	<0.001	18
Renin-angiotensin system	Organismal Systems	Endocrine system	17	<0.001	19
NOD-like receptor signaling pathway	Organismal Systems	Immune system	50	<0.001	14
Phototransduction	Organismal Systems	Sensory system	21	0.038	15
Collecting duct acid secretion	Organismal Systems	Excretory system	26	<0.001	27

## Sheet: 48down
Pathways	Map A	Map B	The number of genes	pvals	The number of TFs
p53 signaling pathway	Cellular Processes	Cell growth and death	65	<0.001	25
Lysosome	Cellular Processes	Transport and catabolism	114	<0.001	23
Endocytosis	Cellular Processes	Transport and catabolism	199	<0.001	28
Apoptosis	Cellular Processes	Cell growth and death	84	<0.001	43
Focal adhesion	Cellular Processes	Cell communication	195	<0.001	32
Adherens junction	Cellular Processes	Cell communication	71	<0.001	33
Gap junction	Cellular Processes	Cell communication	80	<0.001	39
Regulation of actin cytoskeleton	Cellular Processes	Cell motility	205	<0.001	21
ABC transporters	Environmental Information Processing	Membrane transport	44	0.049	25
MAPK signaling pathway	Environmental Information Processing	Signal transduction	258	<0.001	22
Calcium signaling pathway	Environmental Information Processing	Signal transduction	166	<0.001	20
Cytokine-cytokine receptor interaction	Environmental Information Processing	Signaling molecules and interaction	218	<0.001	34
Neuroactive ligand-receptor interaction	Environmental Information Processing	Signaling molecules and interaction	246	<0.001	28
mTOR signaling pathway	Environmental Information Processing	Signal transduction	52	<0.001	30
Wnt signaling pathway	Environmental Information Processing	Signal transduction	146	<0.001	29
Hedgehog signaling pathway	Environmental Information Processing	Signal transduction	54	<0.001	44
TGF-beta signaling pathway	Environmental Information Processing	Signal transduction	81	<0.001	43
VEGF signaling pathway	Environmental Information Processing	Signal transduction	74	<0.001	22
ECM-receptor interaction	Environmental Information Processing	Signaling molecules and interaction	83	<0.001	43
Jak-STAT signaling pathway	Environmental Information Processing	Signal transduction	134	<0.001	28
Aminoacyl-tRNA biosynthesis	Genetic Information Processing	Translation	41	<0.001	7
Ribosome	Genetic Information Processing	Translation	53	<0.001	13
RNA polymerase	Genetic Information Processing	Transcription	24	0.046	29
Protein export	Genetic Information Processing	Folding, sorting and degradation	21	<0.001	22
Protein processing in endoplasmic reticulum	Genetic Information Processing	Folding, sorting and degradation	160	<0.001	23
Metabolic pathways	Global Map	Metabolism	1051	<0.001	8
Alzheimer's disease	Human Diseases	Neurodegenerative diseases	147	<0.001	26
Parkinson's disease	Human Diseases	Neurodegenerative diseases	104	<0.001	18
Amyotrophic lateral sclerosis (ALS)	Human Diseases	Neurodegenerative diseases	54	<0.001	31
Prion diseases	Human Diseases	Neurodegenerative diseases	34	<0.001	29
Bacterial invasion of epithelial cells	Human Diseases	Infectious diseases: Bacterial	67	0.044	50
Leishmaniasis	Human Diseases	Infectious diseases: Parasitic	62	<0.001	20
Chagas disease (American trypanosomiasis)	Human Diseases	Infectious diseases: Parasitic	99	<0.001	28
Malaria	Human Diseases	Infectious diseases: Parasitic	43	<0.001	25
Toxoplasmosis	Human Diseases	Infectious diseases: Parasitic	123	<0.001	24
Amoebiasis	Human Diseases	Infectious diseases: Parasitic	107	<0.001	34
Pathways in cancer	Human Diseases	Cancers	315	<0.001	31
Colorectal cancer	Human Diseases	Cancers	63	<0.001	39
Renal cell carcinoma	Human Diseases	Cancers	70	<0.001	30
Pancreatic cancer	Human Diseases	Cancers	69	<0.001	25
Endometrial cancer	Human Diseases	Cancers	52	<0.001	27
Glioma	Human Diseases	Cancers	59	<0.001	29
Prostate cancer	Human Diseases	Cancers	88	<0.001	30
Basal cell carcinoma	Human Diseases	Cancers	55	<0.001	26
Melanoma	Human Diseases	Cancers	69	0.044	36
Bladder cancer	Human Diseases	Cancers	40	<0.001	8
Chronic myeloid leukemia	Human Diseases	Cancers	71	<0.001	36
Acute myeloid leukemia	Human Diseases	Cancers	57	<0.001	34
Small cell lung cancer	Human Diseases	Cancers	81	<0.001	39
Non-small cell lung cancer	Human Diseases	Cancers	53	<0.001	27
Asthma	Human Diseases	Immune diseases	22	<0.001	14
Autoimmune thyroid disease	Human Diseases	Immune diseases	41	0.040	24
Systemic lupus erythematosus	Human Diseases	Immune diseases	61	<0.001	24
Primary immunodeficiency	Human Diseases	Immune diseases	33	<0.001	18
Hypertrophic cardiomyopathy (HCM)	Human Diseases	Cardiovascular diseases	81	<0.001	32
Arrhythmogenic right ventricular cardiomyopathy (ARVC)	Human Diseases	Cardiovascular diseases	73	<0.001	43
Dilated cardiomyopathy	Human Diseases	Cardiovascular diseases	87	<0.001	38
Citrate cycle (TCA cycle)	Metabolism	Carbohydrate metabolism	30	<0.001	16
Pentose phosphate pathway	Metabolism	Carbohydrate metabolism	25	<0.001	14
Pentose and glucuronate interconversions	Metabolism	Carbohydrate metabolism	19	<0.001	22
Galactose metabolism	Metabolism	Carbohydrate metabolism	27	<0.001	19
Steroid biosynthesis	Metabolism	Lipid metabolism	18	<0.001	22
Primary bile acid biosynthesis	Metabolism	Lipid metabolism	15	<0.001	19
Steroid hormone biosynthesis	Metabolism	Lipid metabolism	41	0.040	19
Purine metabolism	Metabolism	Nucleotide metabolism	152	<0.001	23
Alanine, aspartate and glutamate metabolism	Metabolism	Amino acid metabolism	32	<0.001	22
Valine, leucine and isoleucine biosynthesis	Metabolism	Amino acid metabolism	11	<0.001	30
Starch and sucrose metabolism	Metabolism	Carbohydrate metabolism	32	<0.001	12
N-Glycan biosynthesis	Metabolism	Glycan biosynthesis and metabolism	49	<0.001	17
Mucin type O-Glycan biosynthesis	Metabolism	Glycan biosynthesis and metabolism	25	<0.001	22
Other types of O-glycan biosynthesis	Metabolism	Glycan biosynthesis and metabolism	32	<0.001	18
Glycosaminoglycan biosynthesis - chondroitin sulfate	Metabolism	Glycan biosynthesis and metabolism	21	<0.001	16
Glycosaminoglycan biosynthesis - heparan sulfate	Metabolism	Glycan biosynthesis and metabolism	24	<0.001	25
Glycerolipid metabolism	Metabolism	Lipid metabolism	51	<0.001	15
Arachidonic acid metabolism	Metabolism	Lipid metabolism	77	0.046	21
Glycosphingolipid biosynthesis - ganglio series	Metabolism	Glycan biosynthesis and metabolism	15	<0.001	19
Glyoxylate and dicarboxylate metabolism	Metabolism	Carbohydrate metabolism	18	<0.001	30
Butanoate metabolism	Metabolism	Carbohydrate metabolism	27	<0.001	22
Porphyrin and chlorophyll metabolism	Metabolism	Metabolism of cofactors and vitamins	28	<0.001	17
Terpenoid backbone biosynthesis	Metabolism	Metabolism of terpenoids and polyketides	13	<0.001	22
Nitrogen metabolism	Metabolism	Energy metabolism	22	<0.001	20
Drug metabolism - other enzymes	Metabolism	Xenobiotics biodegradation and metabolism	39	0.044	25
Biosynthesis of unsaturated fatty acids	Metabolism	Lipid metabolism	24	<0.001	18
Chemokine signaling pathway	Organismal Systems	Immune system	168	<0.001	24
Cardiac muscle contraction	Organismal Systems	Circulatory system	66	<0.001	26
Vascular smooth muscle contraction	Organismal Systems	Circulatory system	110	<0.001	22
Dorso-ventral axis formation	Organismal Systems	Development	22	<0.001	24
Axon guidance	Organismal Systems	Development	129	<0.001	32
Osteoclast differentiation	Organismal Systems	Development	112	<0.001	34
Toll-like receptor signaling pathway	Organismal Systems	Immune system	93	<0.001	30
RIG-I-like receptor signaling pathway	Organismal Systems	Immune system	58	<0.001	21
Cytosolic DNA-sensing pathway	Organismal Systems	Immune system	47	<0.001	23
Hematopoietic cell lineage	Organismal Systems	Immune system	70	0.046	28
Natural killer cell mediated cytotoxicity	Organismal Systems	Immune system	100	<0.001	33
T cell receptor signaling pathway	Organismal Systems	Immune system	106	<0.001	33
B cell receptor signaling pathway	Organismal Systems	Immune system	73	<0.001	24
Fc gamma R-mediated phagocytosis	Organismal Systems	Immune system	86	0.044	43
Leukocyte transendothelial migration	Organismal Systems	Immune system	115	<0.001	36
Intestinal immune network for IgA production	Organismal Systems	Immune system	41	<0.001	20
Long-term potentiation	Organismal Systems	Nervous system	60	<0.001	32
Olfactory transduction	Organismal Systems	Sensory system	63	<0.001	18
Taste transduction	Organismal Systems	Sensory system	29	<0.001	40
GnRH signaling pathway	Organismal Systems	Endocrine system	91	<0.001	41
Melanogenesis	Organismal Systems	Endocrine system	93	<0.001	44
Adipocytokine signaling pathway	Organismal Systems	Endocrine system	66	<0.001	31
Vasopressin-regulated water reabsorption	Organismal Systems	Excretory system	43	<0.001	30
Salivary secretion	Organismal Systems	Digestive system	70	<0.001	41
Gastric acid secretion	Organismal Systems	Digestive system	58	<0.001	31
Pancreatic secretion	Organismal Systems	Digestive system	99	<0.001	44
Protein digestion and absorption	Organismal Systems	Digestive system	76	<0.001	29
Fat digestion and absorption	Organismal Systems	Digestive system	43	<0.001	25
Bile secretion	Organismal Systems	Digestive system	70	<0.001	24
Vitamin digestion and absorption	Organismal Systems	Digestive system	23	<0.001	12
