# Supplementary material for: A comprehensive transcriptomic analysis of differentiating embryonic stem cells in response to the overexpression of Mesogenin 1
Source: Aging (Albany NY). 2016 Oct 6;8(10):2324–35. doi: 10.18632/aging.101049 (PMC5115891; doi:10.18632/aging.101049)
Supplement: Supplementary file 3 [file aging-08-2324-s003.xls]

## Sheet: 12up
00010: Glycolysis / Gluconeogenesis（14）		00020: Citrate cycle (TCA cycle)（16）		00040: Pentose and glucuronate interconversions（22）		00051: Fructose and mannose metabolism（20）		00052: Galactose metabolism（19）		00071: Fatty acid metabolism（15）		00100: Steroid biosynthesis（17）		00140: Steroid hormone biosynthesis（19）		00230: Purine metabolism（24）		00240: Pyrimidine metabolism（23）		00250: Alanine, aspartate and glutamate metabolism（22）		00260: Glycine, serine and threonine metabolism（20）		00270: Cysteine and methionine metabolism（11）		00280: Valine, leucine and isoleucine degradation（20）		00290: Valine, leucine and isoleucine biosynthesis（19）		00310: Lysine degradation（26）		00330: Arginine and proline metabolism（21）		00340: Histidine metabolism（21）		00350: Tyrosine metabolism（22）		00360: Phenylalanine metabolism（18）		00380: Tryptophan metabolism（32）		00450: Selenocompound metabolism（20）		00514: Other types of O-glycan biosynthesis（18）		00562: Inositol phosphate metabolism（27）		00565: Ether lipid metabolism（21）
TF	Importance	TF	Importance	TF	Importance	TF	Importance	TF	Importance	TF	Importance	TF	Importance	TF	Importance	TF	Importance	TF	Importance	TF	Importance	TF	Importance	TF	Importance	TF	Importance	TF	Importance	TF	Importance	TF	Importance	TF	Importance	TF	Importance	TF	Importance	TF	Importance	TF	Importance	TF	Importance	TF	Importance	TF	Importance
SOX9_B1	0.25759	SF1	0.45578	ZTA	0.33917	YY1	0.22581	IRF2	0.21536	VBP	0.29608	NFY	0.35158	SOX9_B1	0.36888	PEA3	0.25755	E2F1DP2	0.20798	STAT	0.23889	HNF4_DR1	0.45722	MOVOB	0.35194	ATF1	0.31795	IK2	0.16525	TFIIA	0.18507	NRF2	0.1324	NRF2	0.1324	CDPCR3HD	0.21543	RFX	0.45071	TST1	0.38728	FOXM1	0.18735	XBP1	0.25833	HNF4ALPHA	0.27689	SEF1	0.29987
MZF1	0.13259	TAL1BETAITF2	0.28705	PAX	0.23886	TFE	0.17802	AFP1	0.1827	STAT5B	0.15625	SREBP1	0.14211	AR	0.36145	LEF1	0.24481	RFX1	0.19574	POLY	0.22993	CDPCR3HD	0.18105	SOX9_B1	0.2619	ZTA	0.1492	CDX	0.16497	STAT	0.14444	RSRFC4	0.11344	RSRFC4	0.11344	GRE	0.13887	VMAF	0.30134	CDPCR3HD	0.31098	XBP1	0.12266	RFX1	0.22108	CDPCR3HD	0.22209	MYOGENIN	0.25095
VBP	0.13252	ER	0.24911	SOX9_B1	0.19181	NANOG	0.15645	MYOGENIN	0.11615	IRF1	0.10872	LEF1TCF1	0.11398	NFAT	0.15757	CEBP	0.20162	MYOD	0.12862	MMEF2	0.18837	VBP	0.175	MYCMAX	0.23414	VBP	0.12757	MEIS1	0.15479	TBP	0.14033	PAX8	0.085	PAX8	0.085	OCT	0.13398	MAX	0.28821	POLY	0.21453	E2F1DP1RB	0.11455	NRSF	0.18625	ETS	0.20252	DTYPEPA	0.17048
ER	0.11528	PAX	0.18596	GR	0.11729	MYCMAX	0.14889	ELK1	0.10684	RP58	0.09557	PAX5	0.09368	POU1F1	0.12213	PAX	0.19399	BACH1	0.11915	MEF2	0.16301	HFH8	0.1312	HNF3	0.13416	LEF1	0.12389	PPARA	0.13264	POLY	0.13084	EN1	0.08012	EN1	0.08012	FOXO3	0.11495	MYOD	0.19143	SMAD3	0.17399	PEA3	0.11172	CEBPB	0.12792	NKX62	0.1286	VMAF	0.16784
GRE	0.10676	ZEC	0.1654	GEN_INI2	0.11431	FOXO3	0.10935	SOX9_B1	0.10495	SOX9_B1	0.09519	PAX4	0.09013	XBP1	0.11622	RSRFC4	0.17403	PAX9	0.11653	STAT5A	0.15556	TEL2	0.11458	MAZ	0.11243	S8	0.12188	HMEF2	0.11146	NKX62	0.12057	LDSPOLYA	0.08	LDSPOLYA	0.08	USF	0.10645	P53_DECAMER	0.17723	TCF4	0.16973	E2F4DP2	0.1043	MYOD	0.12583	LHX3	0.1259	GATA	0.12233
STAT5B	0.09433	ZID	0.13884	VBP	0.11071	GEN_INI2	0.09969	NMYC	0.09172	NKX62	0.09135	CDPCR3	0.07849	TAL1BETAITF2	0.11037	STAT	0.16834	MYCMAX	0.10851	HNF4ALPHA	0.13725	SP1	0.1145	VDR	0.11099	NFMUE1	0.09977	BRCA	0.10938	PBX1	0.1191	CMAF	0.074	CMAF	0.074	AML	0.10243	SRY	0.16536	HOXA4	0.15988	VBP	0.10156	VBP	0.11557	TBP	0.11653	TFIIA	0.09603
LFA1	0.06713	RORA1	0.11819	IRF1	0.11042	GABP	0.08048	XFD3	0.0875	PBX1	0.0842	ZIC3	0.07682	CETS168	0.10414	NKX3A	0.15179	PEA3	0.10745	SOX5	0.12269	PAX2	0.08528	E2F1DP2	0.10379	LHX3	0.09893	AP2REP	0.10007	SOX9_B1	0.11736	VMAF	0.0728	VMAF	0.0728	RFX	0.10225	NFE2	0.12902	ICSBP	0.15604	E4BP4	0.09277	PAX3	0.11125	ZTA	0.11017	HFH8	0.09172
NKX22	0.06519	TCF11MAFG	0.0935	AFP1	0.10788	DR3	0.07046	VMYB	0.08229	FOXO4	0.0829	MYC	0.07574	STAT6	0.09848	CDX2	0.13929	GATA	0.10691	CEBP	0.11556	EGR	0.08438	PPARA	0.10351	SOX9_B1	0.08912	FOXM1	0.08333	NERF	0.10564	T3R	0.07005	T3R	0.07005	ERR1	0.09844	SOX5	0.12679	LMO2COM	0.14265	FOXO3	0.08415	SRF	0.08125	MMEF2	0.10158	LDSPOLYA	0.0814
SOX	0.05991	POU1F1	0.07567	STAT5A	0.1059	OLF1	0.06484	RORA1	0.07625	TCF4	0.06862	TATA	0.075	FREAC4	0.08716	RFX1	0.13506	CEBP	0.10166	MYOGNF1	0.11481	LHX3	0.07882	E2A	0.07491	GATA4	0.08685	HLF	0.08125	MEIS1AHOXA9	0.09363	CHOP	0.069	CHOP	0.069	GEN_INI2	0.09326	TAL1	0.11	IK3	0.13751	AP2GAMMA	0.08355	XFD3	0.07777	VJUN	0.09958	FOXO3	0.07802
FREAC7	0.05759	VJUN	0.06964	PITX2	0.10372	TAXCREB	0.06448	XVENT1	0.07122	ATF1	0.06785	TFE	0.07457	PTF1BETA	0.08703	SMAD	0.11688	ACAAT	0.0982	BRACH	0.1041	IK3	0.07539	E2F1DP1RB	0.05884	RSRFC4	0.08331	PEBP	0.07474	GATA3	0.09132	PBX	0.069	PBX	0.069	VBP	0.08652	VBP	0.10977	STAT	0.13716	ETS	0.0832	PBX1	0.07187	CEBP	0.09958	TITF1	0.07542
PPAR_DR1	0.0544	ATF4	0.06004	BRACH	0.0875	LUN1	0.0631	VMAF	0.06953	STAT3	0.06667	GATA	0.07023	IK1	0.08676	STAT4	0.10341	IRF	0.09787	PAX8	0.10278	HLF	0.07285	E2F4DP2	0.05379	WT1	0.0825	POLY	0.06609	TTF1	0.08958	MZF1	0.067	MZF1	0.067	TATA	0.08121	FOXO3	0.10975	ZIC1	0.1314	E12	0.07266	NFAT	0.06813	TCF11	0.09831	GFI1	0.06779
SP3	0.05185	CEBPA	0.06	TST1	0.07812	PPAR_DR1	0.06234	USF	0.06523	AP2ALPHA	0.05903	PPARG	0.06718	MUSCLE_INI	0.08216	TCF11	0.09968	FXR	0.09734	T3R	0.08704	FOXO3	0.0725			GLI	0.08176	CDP	0.06497	HEN1	0.075	NRSF	0.0645	NRSF	0.0645	ZID	0.07938	AP2REP	0.09681	PBX1	0.12264	CLOX	0.07012	PEA3	0.06667	LDSPOLYA	0.09347	RORA1	0.0656
CMAF	0.05179	HNF4	0.0587	TTF1	0.07569	P300	0.0623	TAXCREB	0.06263	XFD1	0.05868	MYOD	0.05592	SRF	0.08176	HLF	0.09172	LBP1	0.0891	WT1	0.08519	CDC5	0.07146			HOXA4	0.07528	TEF	0.06458	HOXA4	0.0749	HNF4_DR1	0.0636	HNF4_DR1	0.0636	TAACC	0.07588	MOVOB	0.08795	PR	0.10139	HSF2	0.0625	HNF6	0.05667	OCT	0.09301	OSF2	0.0653
E4BP4	0.05179	BRN2	0.05647	NFAT	0.07191	COMP1	0.0621	ZF5	0.06234	CEBPB	0.05382	CMYB	0.05444	CHCH	0.07879	NFAT	0.08961	ZTA	0.07872	TBP	0.07963	COMP1	0.0708			EBOX	0.07125	NRF2	0.06146	XVENT1	0.07465	E12	0.0635	E12	0.0635	CEBPB	0.07344	FREAC3	0.08036	STAT3	0.10017	FAC1	0.0625	ZTA	0.05604	EBOX	0.0911	SF1	0.06422
		GRE	0.05473	STAT	0.0684	STAT4	0.06163	VBP	0.06203	POLY	0.05069	NKX3A	0.05263	PAX6	0.07482	RORA1	0.08912	STAT	0.07234	PPARA	0.07407	CREBATF	0.0668			NFY	0.07	VMAF	0.06029	FOXO4	0.07049	ZIC3	0.062	ZIC3	0.062	LUN1	0.07007	CDPCR3HD	0.07766	FOXO4	0.09966	XFD3	0.06246	EGR3	0.05604	CEBPA	0.08859	AP2GAMMA	0.05901
		MAX	0.05169	NFE2	0.06806	XFD3	0.06103	SF1	0.05869			LDSPOLYA	0.05263	IRF1	0.07061	XPF1	0.08482	NRF1	0.06809	NRSF	0.07368	CEBPDELTA	0.05699			EVI1	0.06029	MYOGNF1	0.0536	HOXA7	0.06993	GATA3	0.05969	GATA3	0.05969	EN1	0.06691	XPF1	0.06406	HNF4ALPHA	0.08887	SMAD3	0.06157	HMGIY	0.05425	RORA1	0.08644	GRE	0.05733
				TAL1BETAITF2	0.06632	POU6F1	0.05937	FOXO3	0.05705			RSRFC4	0.0501	NFKAPPAB65	0.06213	TEL2	0.08312	HFH3	0.06649	USF	0.07269	NFKAPPAB	0.05417			CDX	0.05868	CAP	0.05334	PBX	0.06833	LXR_DR4	0.05775	LXR_DR4	0.05775	PAX4	0.0597	RORA1	0.06266	SOX9_B1	0.07986	SOX5	0.05984	ETS1	0.0526	RSRFC4	0.08178	PPARG	0.05651
				STAT6	0.06059	UF1H3BETA	0.05685	MEIS1BHOXA9	0.05172					NFY	0.05636	ZTA	0.07597	MOVOB	0.06516	CHOP	0.06701	RORA2	0.05403			MYB	0.05518	PTF1BETA	0.0526	XBP1	0.06833	LUN1	0.05675	LUN1	0.05675	ATF1	0.05867	AHRHIF	0.05795	IRF7	0.07922	MUSCLE_INI	0.05645	BRN2	0.052	FOXO1	0.07538	VJUN	0.05421
				CEBPDELTA	0.05556	LBP1	0.05412	ELF1	0.05026					SZF11	0.05118	HFH1	0.06836	LEF1	0.06436	LMO2COM	0.05861	ZIC1	0.05389			CEBPA	0.05256	NKX61	0.05124	MAX	0.0651	HLF	0.051	HLF	0.051	LMO2COM	0.05664			GATA4	0.07895	HOXA7	0.05244			YY1	0.07458	TBX5	0.05379
				WT1	0.05239	HNF4	0.05353									STAT6	0.05804	SMAD4	0.06383	HLF	0.0559	SPZ1	0.05097			PPAR_DR1	0.05065			SMAD3	0.06493	ZID	0.05037	ZID	0.05037	STAT5B	0.05434			LXR	0.07277	BEL1	0.05137			ZID	0.07203	HLF	0.05246
				RUSH1A	0.05055											VJUN	0.05772	PPARG	0.05957	SRF	0.05278									VJUN	0.05406	IK1	0.0501	IK1	0.0501	AP2ALPHA	0.0541			TCF11MAFG	0.0723					P53	0.07076	CIZ	0.05038
				SPZ1	0.05043											MEF2	0.05682	GC	0.05519	AP4	0.05179									RFX1	0.05337					DR1	0.05195			IK1	0.07105					GR	0.06708
																STAT5B	0.05536	FAC1	0.05406											SF1	0.05278									HOXA3	0.07086					ETS2	0.06632
																MEIS1	0.05032													ZNF219	0.05089									HSF2	0.06672					RBPJK	0.06081
																														TCF11	0.05061									BRN2	0.06522					MYOD	0.05932
																														CDPCR3HD	0.05008									CREL	0.06291					GEN_INI	0.05695
																																								MEIS1BHOXA9	0.06284					TCF4	0.05593
																																								PPARG	0.0625
																																								LHX3	0.0601
																																								P53_DECAMER	0.05752
																																								PPARA	0.05166
																																								VBP	0.05
[truncated: 116 more columns]

## Sheet: 12down
00512: Mucin type O-Glycan biosynthesis（22）		00790: Folate biosynthesis（28）		00983: Drug metabolism - other enzymes（25）		03010: Ribosome（25）		04020: Calcium signaling pathway（20）		04060: Cytokine-cytokine receptor interaction（34）		04270: Vascular smooth muscle contraction（32）		04330: Notch signaling pathway（34）		04340: Hedgehog signaling pathway（44）		04514: Cell adhesion molecules (CAMs)（38）		04610: Complement and coagulation cascades（17）		04916: Melanogenesis（31）		04975: Fat digestion and absorption（25）		05020: Prion diseases（29）		05143: African trypanosomiasis（19）		05144: Malaria（25）		05412: Arrhythmogenic right ventricular cardiomyopathy (ARVC)（43）
TF	Importance	TF	Importance	TF	Importance	TF	Importance	TF	Importance	TF	Important	TF	Importance	TF	Importance	TF	Importance	TF	Importance	TF	Importance	TITF1	0.14463	TF	Importance	TF	Importance	TF	Importance	TF	Importance	TF	Importance
HOX13	0.28145	GLI	0.18285	FXR	0.56127	PEA3	0.26701	P53_DECAMER	0.26125	NFKB	1.1434	HNF3ALPHA	0.29704	WT1	0.27054	CIZ	0.36362	PEA3	0.52002	HNF1	0.22472	ZIC1	0.14263	LXR_DR4	0.3151	BRN2	0.27271	NFKAPPAB65	0.24479	NFKAPPAB65	0.55271	ZTA	0.3487
TCF4	0.19158	EBOX	0.15546	NRSF	0.22964	GC	0.26225	PAX9	0.19388	NFKAPPAB65	0.9117	SEF1	0.22614	HEB	0.25857	GATA2	0.33255	MYOGENIN	0.34187	HNF4ALPHA	0.21493	TCF4	0.14231	RUSH1A	0.23081	PBX1	0.24063	NFKB	0.17396	SOX9_B1	0.24571	MAZ	0.26055
TTF1	0.15181	SOX9_B1	0.154	E2F1DP1	0.1998	GABP	0.15908	LFA1	0.17263	NFKAPPAB	0.79113	SRF	0.17661	ZNF219	0.17619	TITF1	0.32871	E12	0.32973	GCNF	0.15913	AP2GAMMA	0.12821	RFX1	0.225	PBX	0.1675	PR	0.14167	ELK1	0.20732	P53	0.25536
IRF1	0.14935	HP1SITEFACTOR	0.11031	FAC1	0.16603	ELK1	0.1436	TAL1BETAE47	0.14553	ETS2	0.3672	FOXM1	0.14677	CACCCBINDINGFACTOR	0.15625	AIRE	0.26333	MYOD	0.23301	ARP1	0.15597	LEF1	0.12788	VMAF	0.20349	CART1	0.16381	PU1	0.12493	SMAD	0.19512	TAXCREB	0.24058
GFI1	0.14198	VJUN	0.09858	STAT4	0.15994	CREB	0.13634	NF1	0.14132	USF	0.24823	MYCMAX	0.13799	OLF1	0.15089	HELIOSA	0.25896	POU3F2	0.2301	STAT	0.1237	E12	0.1234	OSF2	0.20298	RUSH1A	0.16289	ZTA	0.11563	PU1	0.1696	LHX3	0.21023
PEBP	0.11886	XBP1	0.09696	PAX9	0.1528	STAT3	0.13372	RSRFC4	0.10987	STAT1	0.16401	VJUN	0.13656	POLY	0.14325	TEF1	0.22866	GRE	0.18691	VMAF	0.08843	EBOX	0.12019	GATA	0.18721	ROAZ	0.14798	NMYC	0.1142	STAT6	0.12988	MSX1	0.16948
TBX5	0.11652	IK1	0.096	PTF1BETA	0.15232	HFH4	0.12564	TEF1	0.09684	MYOGENIN	0.15408	VBP	0.12608	TEF	0.12902	FREAC7	0.22761	OTX	0.17172	FOXJ2	0.08815	CART1	0.11979	BACH2	0.18721	NFKAPPAB65	0.136	STAT	0.10703	XFD2	0.12256	NKX62	0.16778
NFKAPPAB65	0.11359	FOXD3	0.09172	STAF	0.15133	GATA6	0.1046	ZID	0.09604	PBX	0.14731	TST1	0.12433	TAL1BETAITF2	0.11845	SOX9_B1	0.20472	FOXD3	0.16505	T3R	0.07444	HEB	0.11859	MAX	0.16	HNF4ALPHA	0.11006	SMAD	0.10167	FREAC2	0.09024	ZIC3	0.16729
GCNF	0.09871	XFD1	0.0825	PBX	0.13834	MYCMAX	0.1015	PADS	0.09013	TCF11	0.11935	HMGIY	0.12164	MOVOB	0.1097	ZBRK1	0.18656	S8	0.15528	TAXCREB	0.07215	COUP	0.10897	XPF1	0.14884	SRY	0.10625	PAX3	0.07555	GEN_INI2	0.08618	PAX4	0.16347
HIF1	0.09073	PAX4	0.08179	SPZ1	0.1247	RORA1	0.09658	SF1	0.08474	LMO2COM	0.10865	GATA3	0.1205	VJUN	0.10521	STAT6	0.18491	VDR	0.14563	TEL2	0.07214	HNF4ALPHA	0.10489	FREAC2	0.14088	TGIF	0.09625	AML	0.07352	E2F1DP1RB	0.08335	UF1H3BETA	0.14545
TEF	0.08435	OTX	0.07875	TFE	0.10655	FOXO3	0.09433	PR	0.07697	PU1	0.10776	PR	0.11559	LXR	0.10357	ZF5	0.18396	SRY	0.14563	TCF4	0.06754	RP58	0.10473	NFE2	0.125	XPF1	0.08875	PXR	0.07201	E47	0.08293	NFKAPPAB	0.1388
FOXM1	0.07717	FREAC3	0.07797	RSRFC4	0.10222	NKX62	0.09231	XFD3	0.07368	TATA	0.10674	AP2ALPHA	0.10988	VBP	0.10124	MUSCLE_INI	0.18255	NRF2	0.13769	SP3	0.06256	HELIOSA	0.10256	RFX	0.12355	NFE2	0.08781	RORA1	0.06896	ETS	0.07816	CDPCR1	0.13856
STAT3	0.07609	CDPCR3HD	0.07719	SRF	0.09839	CETS1P54	0.08983	SOX9_B1	0.07289	HMGIY	0.10248	NF1	0.10484	E47	0.1	SOX5	0.1717	ROAZ	0.13301	DTYPEPA	0.06016	GATA4	0.09936	TBX5	0.11395	CP2	0.0875	STAT6	0.05778	IK3	0.07622	CDX2	0.13335
MEIS1AHOXA9	0.07575	NKX3A	0.07575	DELTAEF1	0.07429	AHR	0.08779	TBX5	0.07158	IRF	0.0984	AP2GAMMA	0.10403	ZF5	0.09792	NFKAPPAB50	0.15566	CACCCBINDINGFACTOR	0.12682	HOXA3	0.05401	AP2ALPHA	0.09856	GATA1	0.1064	STAT	0.085	TEF1	0.05615	NFKB	0.07546	SOX9_B1	0.13054
AP2GAMMA	0.06862	OCT	0.07524	IK1	0.07393	MINI19	0.08771	NRSF	0.06645	ISRE	0.09295	NKX62	0.10027	CACBINDINGPROTEIN	0.09048	DR1	0.12712	HFH8	0.12621	LYF1	0.05379	USF	0.09581	RORA2	0.1032	BARBIE	0.07929	CREBATF	0.05589	HLF	0.07245	SP1	0.12985
TAL1	0.06861	AP3	0.07412	IRF1	0.06901	E2F	0.08569	PEA3	0.06421	CETS1P54	0.08478	TAL1BETAE47	0.09691	EFC	0.0881	MRF2	0.12264	CACD	0.11553	FREAC7	0.05269	TAL1BETAITF2	0.08846	CDXA	0.09767	HFH1	0.07838	2014-10-04	0.05387	TCF11MAFG	0.07024	SPZ1	0.12727
CMAF	0.06522	RORA1	0.07279	TEL2	0.06446	VMYB	0.07544	LXR_DR4	0.06336	NRF2	0.08422	STAT	0.08804	E12	0.0881	LEF1	0.12193	LMO2COM	0.10874	HNF3ALPHA	0.05267	NANOG	0.08494	STAT4	0.0943	TFIII	0.07638	FREAC4	0.05336	DELTAEF1	0.07018	NKX61	0.12338
CEBPDELTA	0.06366	GZF1	0.06975	DEC	0.06402	GATA3	0.0693	SEF1	0.05783	FXR	0.08389	HLF	0.07661	ZIC1	0.08095	MMEF2	0.10849	SREBP1	0.10777			MAX	0.08381	HNF4_DR1	0.09084	FOXO4	0.07275	TCF4	0.0529	PPARG	0.0686	TFIII	0.12175
NRSF	0.06195	ROAZ	0.06969	LPOLYA	0.06177	ETS1	0.06148	E2	0.05691	IRF1	0.08183	TAL1BETAITF2	0.07634	P53_DECAMER	0.08095	XFD3	0.10649	NFKAPPAB50	0.1068			AP2	0.07692	SEF1	0.08081	PPARA	0.06875	TAACC	0.05055	CREBATF	0.06745	TTF1	0.11282
COUP_DR1	0.06046	CRX	0.06803	LDSPOLYA	0.06015	TTF1	0.06076	HFH8	0.05289	OTX	0.07819	TAL1	0.07527	RBPJK	0.07857	MAZR	0.10566	NFE2	0.1034			TFE	0.07628	USF	0.07988	P53	0.0673			E2F4DP2	0.06463	GZF1	0.1108
RORA1	0.0602	MINI20	0.0675	NFKAPPAB50	0.05984	YY1	0.05669			GCNF	0.07589	COUP	0.07419	SRY	0.07596	WHN	0.10472	MINI19	0.09881			TBP	0.07179	ATF4	0.07227	POU1F1	0.06544			VMAF	0.06311	CART1	0.10284
STAT4	0.05985	CREBP1	0.06072	GFI1B	0.05403	E2F4DP1	0.05538			PAX2	0.07509	POU6F1	0.0672	S8	0.06762	ACAAT	0.10318	SOX9_B1	0.09879			MOVOB	0.06891	MYCMAX	0.06628	ALX4	0.06523			CEBP	0.06067	IRF7	0.1013
		HEB	0.05984	LBP1	0.05396	ELF1	0.05469			ETS	0.07074	SMAD4	0.06183	STAT5A	0.06667	MINI20	0.10236	SP3	0.09782			CRX	0.06486	FXR	0.0661	R	0.06125			NFKAPPAB	0.05549	ELF1	0.09821
		DTYPEPA	0.05755	MOVOB	0.05269	CACD	0.053			HNF3B	0.06968	LEF1	0.05914	COUP_DR1	0.06616	CHCH	0.09965	TGIF	0.09393			NFKB	0.0641	HMEF2	0.06227	DR1	0.06019			ETS2	0.0545	LEF1	0.0974
		STAT4	0.05594	NKX61	0.05206	MAX	0.05108			STAT	0.06915	GCNF	0.05847	HSF	0.0656	FOX	0.09611	NFKAPPAB65	0.09393			MINI20	0.06136	STAT5A	0.05814	HSF1	0.05775			STAT	0.05126	WT1	0.09286
		NKX62	0.05525							LEF1TCF1	0.06144	ZIC1	0.05753	SP1	0.06548	E2F4DP1	0.09434	USF	0.09078			PBX	0.05929			MYOGENIN	0.05487					CMAF	0.09091
		BRACH	0.05477							GATA1	0.05979	WHN	0.05591	LRF	0.06101	MYOGENIN	0.09245	PBX	0.0807			CDP	0.05685			TBP	0.05392					BARBIE	0.08563
		MYB	0.05125							BRACH	0.05904	NFE2	0.05484	ALX4	0.05851	MOVOB	0.09198	MOVOB	0.06732			UF1H3BETA	0.05641			KROX	0.05084					POU1F1	0.08052
										PADS	0.059	NFKAPPAB65	0.05376	NMYC	0.05804	PBX1	0.08691	TAL1BETAE47	0.06675			NRSE	0.05609			IRF	0.05021					LEF1TCF1	0.07305
										LEF1	0.05762	ZF5	0.05285	EGR3	0.05714	CRX	0.08463	SZF11	0.06371			CEBP	0.05509									CHCH	0.07143
										TBP	0.05709	TCF4	0.05269	OTX	0.05476	AP2	0.08302	LHX3	0.06311			NKX25	0.05									ZEC	0.07135
										XPF1	0.05523	HNF4_DR1	0.05054	AML1	0.05268	CACCCBINDINGFACTOR	0.08019	ZTA	0.06286													CLOX	0.06899
										PR	0.05461			AP2GAMMA	0.05268	LYF1	0.08007	CLOX	0.05898													HNF6	0.06737
										STAT6	0.05053			PPARA	0.05	IK2	0.07594	FOXO3	0.05716													ZID	0.06676
																COUP	0.06651	FREAC3	0.05461													HFH3	0.06623
																LXR	0.06592	PAX6	0.0534													LMO2COM	0.06534
																ZNF219	0.06274	TAL1	0.0534													EBF	0.05714
																NKX25	0.06132	ZID	0.05012													SRY	0.05714
																RFX1	0.06038															ATF3	0.05683
																PAX	0.05649															S8	0.05682
																CART1	0.05566															RORA2	0.05146
																CHX10	0.0543															HP1SITEFACTOR	0.05032
																NCX	0.05337															XBP1	0.05032
																NFKAPPAB	0.05059

## Sheet: 24up
00140: Steroid hormone biosynthesis(19)		00240: Pyrimidine metabolism(23)		00260: Glycine, serine and threonine metabolism(20)		00270: Cysteine and methionine metabolism(13)		00310: Lysine degradation(26)		00360: Phenylalanine metabolism(18)		00380: Tryptophan metabolism(32)		00562: Inositol phosphate metabolism(27)		00564: Glycerophospholipid metabolism(16)		00565: Ether lipid metabolism(21)		00670: One carbon pool by folate(26)		00770: Pantothenate and CoA biosynthesis(19)		03008: Ribosome biogenesis in eukaryotes(18)		03013: RNA transport(21)		03015: mRNA surveillance pathway(42)		03020: RNA polymerase(29)		03040: Spliceosome(30)		03050: Proteasome(20)		03320: PPAR signaling pathway(25)		04115: p53 signaling pathway(25)		04120: Ubiquitin mediated proteolysis(35)		04145: Phagosome(30)		04612: Antigen processing and presentation(15)		04622: RIG-I-like receptor signaling pathway(19)		04966: Collecting duct acid secretion(27)
TF	Importance	TF	Importance	TF	Importance	TF	Importance	TF	Importance	TF	Importance	TF	Importance	TF	Importance	TF	Importance	TF	Importance	TF	Importance	TF	Importance	TF	Importance	TF	Importance	TF	Importance	TF	Importance	TF	Importance	TF	Importance	TF	Importance	TF	Importance	TF	Importance	TF	Importance	TF	Importance	TF	Importance	TF	Importance
CHCH	0.07879	ZTA	0.07872	COMP1	0.0708	HNF3	0.21635	TFIIA	0.18507	RFX	0.45071	TST1	0.38728	HNF4ALPHA	0.27689	NFKAPPAB65	0.1709	SEF1	0.29987	XFD3	0.2337	VBP	0.19152	STAT3	0.26	TBX5	0.14592	TST1	0.4077	STAT	0.37734	RBPJK	0.29762	AHRARNT	0.22591	PPARG	0.33669	NFE2	0.30365	HLF	0.35729	XFD3	0.36169	MINI19	0.21208	NFKB	0.34676	STAT4	0.3082
PAX6	0.07482	STAT	0.07234	CREBATF	0.0668	MOVOB	0.12205	STAT	0.14444	VMAF	0.30134	CDPCR3HD	0.31098	CDPCR3HD	0.22209	RFX1	0.11716	MYOGENIN	0.25095	CHCH	0.21779	CDX	0.14286	TST1	0.25638	SOX9_B1	0.12449	TEL2	0.38659	MYC	0.33955	STAT6	0.28533	ACAAT	0.18369	XFD1	0.30536	CMAF	0.19542	NKX25	0.26187	IRF	0.35226	T3R	0.13305	POLY	0.19734	MSX1	0.27581
IRF1	0.07061	NRF1	0.06809	CEBPDELTA	0.05699	P53_DECAMER	0.09459	TBP	0.14033	MAX	0.28821	POLY	0.21453	ETS	0.20252	RORA1	0.10261	DTYPEPA	0.17048	ETS2	0.20458	HOXA4	0.14196	CREBP1	0.20417	NRF2	0.11939	VJUN	0.28116	SREBP	0.24375	STAT5B	0.23614	NRF2	0.12927	HFH8	0.2681	S8	0.19375	BRCA	0.23611	SOX9_B1	0.17754	USF	0.1061	IRF2	0.16273	HFH4	0.2466
NFKAPPAB65	0.06213	HFH3	0.06649	NFKAPPAB	0.05417	SOX5	0.0823	POLY	0.13084	MYOD	0.19143	SMAD3	0.17399	NKX62	0.1286	HNF4_DR1	0.09552	VMAF	0.16784	LRF	0.17955	RFX1	0.11752	TCF4	0.14125	P53_DECAMER	0.11429	ATF3	0.22609	NFMUE1	0.23813	YY1	0.22418	DTYPEPA	0.11936	PPAR_DR1	0.13247	OCT	0.17917	ZTA	0.23258	TAL1BETAITF2	0.15068	GC	0.10169	NFKAPPAB	0.14352	ETS	0.2019
NFY	0.05636	MOVOB	0.06516	RORA2	0.05403	E2A	0.07905	NKX62	0.12057	P53_DECAMER	0.17723	TCF4	0.16973	LHX3	0.1259	DBP	0.07882	GATA	0.12233	MYC	0.15714	SOX9_B1	0.10611	HNF6	0.13568	TAACC	0.10742	TBX5	0.18696	USF2	0.20475	IRF2	0.16168	ATF	0.10366	SREBP1	0.11818	STAT	0.175	BACH1	0.20682	PU1	0.13435	PAX6	0.09573	NFAT	0.11632	MIF1	0.1945
SZF11	0.05118	LEF1	0.06436	ZIC1	0.05389	MYOGNF1	0.06752	PBX1	0.1191	SRY	0.16536	HOXA4	0.15988	TBP	0.11653	PADS	0.06623	TFIIA	0.09603	ETS1	0.15552	TEF	0.10437	ATF1	0.11927	TAL1	0.10612	WT1	0.15816	WHN	0.19062	GZF1	0.14457	FOXM1	0.10012	MTATA	0.0961	VMAF	0.15823	STAT1	0.15758	PEA3	0.11871	NFKB	0.0875	MYCMAX	0.10148	RUSH1A	0.1863
		SMAD4	0.06383	SPZ1	0.05097	PPARA	0.06077	SOX9_B1	0.11736	NFE2	0.12902	ICSBP	0.15604	ZTA	0.11017	AMEF2	0.06618	HFH8	0.09172	GATA1	0.14295	XVENT1	0.09554	TCF11	0.11536	ATF4	0.09072	RP58	0.1471	E2F1DP1RB	0.18848	NKX61	0.13451	E4F1	0.09619	CLOX	0.09435	VBP	0.15208	XFD3	0.15505	ETS	0.1129	NRSF	0.08019	HNF4_DR1	0.10046	OSF2	0.17953
		PPARG	0.05957			GATA1	0.0567	NERF	0.10564	SOX5	0.12679	LMO2COM	0.14265	MMEF2	0.10158	SRF	0.06567	LDSPOLYA	0.0814	MAX	0.12567	NFKAPPAB65	0.09141	PBX1	0.1	YY1	0.08673	SZF11	0.13913	PPARG	0.13203	MAX	0.11944	HSF	0.09554	DR1	0.0931	POU1F1	0.11448	YY1	0.14672	COREBINDINGFACTOR	0.10746	PAX	0.07256	PBX1	0.08981	HMEF2	0.16356
		GC	0.05519			OSF2	0.05667	MEIS1AHOXA9	0.09363	TAL1	0.11	IK3	0.13751	VJUN	0.09958	TST1	0.06551	FOXO3	0.07802	E2F4DP1	0.11405	HMEF2	0.08996	PEA3	0.08958	MIF1	0.08622	RORA1	0.13465	RORA1	0.12441	MMEF2	0.11413	TBX5	0.08708	T3R	0.07857	OTX	0.10354	APOLYA	0.14031	PBX	0.10323	GR	0.06525	LMO2COM	0.08565	ZNF219	0.16264
		FAC1	0.05406			MYCMAX	0.05296	GATA3	0.09132	VBP	0.10977	STAT	0.13716	CEBP	0.09958	FREAC2	0.06426	TITF1	0.07542	FOXO3	0.09748	LHX3	0.08722	MYCMAX	0.08448	LEF1	0.08291	ETS1	0.1163	MEIS1AHOXA9	0.11064	STAT	0.0913	YY1	0.08638	P53_DECAMER	0.07792	CRX	0.09685	SOX5	0.13567	GRE	0.09266	DR1	0.05919	NRF2	0.08565	CIZ	0.16208
						RP58	0.05138	TTF1	0.08958	FOXO3	0.10975	ZIC1	0.1314	TCF11	0.09831	SMAD	0.06343	GFI1	0.06779	USF2	0.0942	HFH1	0.08058	OSF2	0.08292	MYB	0.08163	E2F	0.10435	SPZ1	0.11031	ZIC3	0.09073	VBP	0.07957	XFD3	0.07338	RSRFC4	0.09665	USF	0.13447	CHOP	0.09194	PU1	0.05661	HNF4ALPHA	0.08375	HNF3B	0.15319
						LEF1	0.05036	HEN1	0.075	AP2REP	0.09681	PBX1	0.12264	LDSPOLYA	0.09347	OSF2	0.06306	RORA1	0.0656	CREBP1	0.09164	XFD2	0.06696	TEL2	0.07801	STAF	0.07857	SPZ1	0.10433	ACAAT	0.10229	NFMUE1	0.08832	MSX1	0.07627	MEIS1	0.07273	TAL1BETAITF2	0.09625	IK3	0.12771	RFX1	0.08581	CAAT	0.0529	2014-10-04	0.07963	E2F1DP1RB	0.12073
						NANOG	0.05012	HOXA4	0.0749	MOVOB	0.08795	PR	0.10139	OCT	0.09301	HEN1	0.05877	OSF2	0.0653	E2F1DP1RB	0.08758	CAAT	0.06458	FXR_IR1	0.07122	TEL2	0.07781	TEF	0.10236	GATA	0.1	NRF2	0.08832	HFH3	0.07614	SF1	0.07273	CHOP	0.08958	STAT	0.11944	LBP1	0.08387	XBP1	0.05228	TAL1	0.07963	CP2	0.112
								XVENT1	0.07465	FREAC3	0.08036	STAT3	0.10017	EBOX	0.0911	CREB	0.05746	SF1	0.06422	GLI	0.08718	ERR1	0.05915	CART1	0.0675	RP58	0.06441	SREBP1	0.10153	PEA3	0.0975	CDPCR1	0.08016	HNF3ALPHA	0.07111	MEIS1AHOXA9	0.0724	XFD3	0.07667	WT1	0.11717	FOXO3	0.08306	STRA13	0.05191	HP1SITEFACTOR	0.06701	AP2GAMMA	0.09956
								FOXO4	0.07049	CDPCR3HD	0.07766	FOXO4	0.09966	CEBPA	0.08859	TITF1	0.05606	AP2GAMMA	0.05901	HFH8	0.07433	GCM	0.05865	STAT1	0.06	ATF1	0.06148	PEA3	0.09855	MYCMAX	0.0975	E4BP4	0.07989	CMAF	0.06631	RSRFC4	0.07224	GEN_INI2	0.07446	LEF1TCF1	0.10101	PAX2	0.07566	SMAD3	0.05154	PAX4	0.06438	PPARG	0.09233
								HOXA7	0.06993	XPF1	0.06406	HNF4ALPHA	0.08887	RORA1	0.08644	GATA	0.05224	GRE	0.05733	FREAC2	0.07333	EGR2	0.05393	ZEC	0.05378	MAX	0.06148	PAX6	0.08886	MYOD	0.09198	TEF	0.06766	IRF2	0.06585	ETS1	0.06558	LFA1	0.07	SOX9_B1	0.09899	CIZ	0.07482			IK3	0.06134	GLI	0.07637
								PBX	0.06833	RORA1	0.06266	SOX9_B1	0.07986	RSRFC4	0.08178			PPARG	0.05651	MEIS1AHOXA9	0.07143	HFH8	0.05348	RFX	0.05	MEIS1	0.06071	PAX4	0.0875	R	0.06718	ZIC2	0.06522	STAT1	0.06252	OCT	0.06546	AP1	0.06708	TAL1BETAITF2	0.09747	NRSF	0.07419			NFKAPPAB50	0.05278	SZF11	0.07163
								XBP1	0.06833	AHRHIF	0.05795	IRF7	0.07922	FOXO1	0.07538			VJUN	0.05421	SOX9_B1	0.07054	XFD3	0.05312	COUP	0.05	TAL1ALPHAE47	0.05918	OSF2	0.08243	E2F1DP2	0.06356	STAT4	0.06467	IRF	0.06189	NANOG	0.06364	SPZ1	0.0665	CEBPB	0.09684	TCF11MAFG	0.07298			AP3	0.05174	ARNT	0.06987
								MAX	0.0651			GATA4	0.07895	YY1	0.07458			TBX5	0.05379	HP1SITEFACTOR	0.07009	ETS2	0.05			SOX	0.05893	TAL1	0.08116	SRF	0.06234	MZF1	0.06467	SOX	0.05299	XPF1	0.05805	XPF1	0.06458	NFMUE1	0.08545	XPF1	0.07097			MRF2	0.05035	POU1F1	0.06894
								SMAD3	0.06493			LXR	0.07277	ZID	0.07203			HLF	0.05246	ROAZ	0.07009					SZF11	0.05663	NRSE	0.07717	POU6F1	0.06215	STAT1	0.05937	LBP1	0.05128	TBX5	0.05714	STAT6	0.06417	MAX	0.08207	AP1	0.07048					BARBIE	0.06775
								VJUN	0.05406			TCF11MAFG	0.0723	P53	0.07076			CIZ	0.05038	TAL1BETAITF2	0.06793					HNF1	0.05167	PEBP	0.07391	NKX3A	0.06187	HFH8	0.05905			AP3	0.05649	TAL1	0.06146	HMGIY	0.08081	ZIC1	0.06895					MMEF2	0.06544
								RFX1	0.05337			IK1	0.07105	GR	0.06708					HOX13	0.0642							HSF	0.07246	PEBP	0.05937	MSX1	0.0574			PTF1BETA	0.05519	HIF1	0.06108	PR	0.07677	ELK1	0.06671					AML	0.05803
								SF1	0.05278			HOXA3	0.07086	ETS2	0.06632					TEL2	0.06414							CETS168	0.07174	GZF1	0.05596	TAACC	0.05707			MYOD	0.05455	2014-10-04	0.05979	ATF1	0.07396	XBP1	0.06516					PTF1BETA	0.05759
								ZNF219	0.05089			HSF2	0.06672	RBPJK	0.06081					CLOX	0.05535							VMAF	0.06996	GC	0.05336	ATATA	0.05611			SEF1	0.0539	FOXO3	0.05417	TAACC	0.07105	NCX	0.06242					NFKAPPAB65	0.05598
								TCF11	0.05061			BRN2	0.06522	MYOD	0.05932					AP2GAMMA	0.05462							NFKAPPAB50	0.06866	NRF1	0.05219	RREB1	0.05543			RORA1	0.05308	GATA1	0.05296	NFAT	0.07071	CLOX	0.06048					PAX9	0.05412
								CDPCR3HD	0.05008			CREL	0.06291	GEN_INI	0.05695					VBP	0.05446							ATF4	0.06739	TBX5	0.05078	VMYB	0.05435							MMEF2	0.07045	STRA13	0.05935					ERR1	0.0537
												MEIS1BHOXA9	0.06284	TCF4	0.05593													MUSCLE_INI	0.0664	OTX	0.05078	VJUN	0.05333							XFD2	0.06919	FAC1	0.05589					FOX	0.05303
												PPARG	0.0625															EGR1	0.06506	FOXO1	0.05039	IK2	0.05326							LMO2COM	0.06343	PAX	0.05355
												LHX3	0.0601															IRF1	0.06413	HSF	0.05035	LYF1	0.05326							TCF4	0.06263	CAAT	0.0521
												P53_DECAMER	0.05752															NFY	0.06377			E2	0.05299							LHX3	0.06155	OLF1	0.05161
												PPARA	0.05166															VBP	0.06304											SRY	0.06061
												VBP	0.05															HES1	0.06196											EGR	0.05532
																												SRF	0.06196											PAX6	0.05215
																												R	0.06159											HIF1	0.05152
																												ZNF219	0.05851											PTF1BETA	0.05051
																												GZF1	0.05761
																												FREAC2	0.05688
																												CRX	0.05616
																												DTYPEPA	0.05583
																												NGFIC	0.0533
																												TGIF	0.05242
																												CEBPA	0.0514
[truncated: 8 more columns]

## Sheet: 24down
00020: Citrate cycle (TCA cycle)(16)		00250: Alanine, aspartate and glutamate metabolism(22)		00410: beta-Alanine metabolism(20)		00500: Starch and sucrose metabolism(12)		00510: N-Glycan biosynthesis(14)		00512: Mucin type O-Glycan biosynthesis(22)		00514: Other types of O-glycan biosynthesis(18)		00520: Amino sugar and nucleotide sugar metabolism(20)		00600: Sphingolipid metabolism(26)		00601: Glycosphingolipid biosynthesis - lacto and neolacto series(36)		00603: Glycosphingolipid biosynthesis - globo series(19)		00604: Glycosphingolipid biosynthesis - ganglio series(19)		00630: Glyoxylate and dicarboxylate metabolism(30)		00650: Butanoate metabolism(22)		00900: Terpenoid backbone biosynthesis(26)		00983: Drug metabolism - other enzymes(25)		03010: Ribosome(18)		03060: Protein export(23)		04010: MAPK signaling pathway(21)		04012: ErbB signaling pathway(40)		04020: Calcium signaling pathway(31)		04060: Cytokine-cytokine receptor interaction(34)		04062: Chemokine signaling pathway(24)		04110: Cell cycle(37)		04114: Oocyte meiosis(27)
TF	Importance	TF	Importance	TF	Importance	TF	Importance	TF	Importance	TF	Importance	TF	Importance	TF	Importance	TF	Importance	TF	Importance	TF	Importance	TF	Importance	TF	Importance	TF	Importance	TF	Importance	TF	Importance	TF	Importance	TF	Importance	TF	Importance	TF	Importance	TF	Importance	TF	Importance	TF	Importance	TF	Importance	TF	Importance
SF1	0.45578	STAT	0.23889	LHX3	0.18427	MEIS1BHOXA9	0.23524	PEA3	0.3266	HOX13	0.28145	XBP1	0.25833	MYCMAX	0.21702	PAX8	0.16611	TEL2	0.38913	PBX1	0.18029	HEB	0.44063	S8	0.63223	TBP	0.24076	TFE	0.5108	FXR	0.56127	NRF2	0.18866	XFD3	0.33717	NFKAPPAB65	0.63665	SZF11	0.35833	PAX9	0.24185	NFKAPPAB65	1.39896	VJUN	0.20789	E2F4DP2	0.60662	PAX4	0.21667
TAL1BETAITF2	0.28705	POLY	0.22993	LXR_DR4	0.16417	LEF1	0.15556	ETS2	0.20765	TCF4	0.19158	RFX1	0.22108	TAL1BETAE47	0.18617	GATA	0.14878	GFI1	0.28098	TFE	0.15048	CHCH	0.42813	SF1	0.35893	POLY	0.18696	NFY	0.41708	NRSF	0.22964	STAT3	0.17927	TCF11	0.31224	NFKAPPAB50	0.42938	STAT4	0.29713	SREBP1	0.21304	NFKB	0.9279	STAT5B	0.17086	MYCMAX	0.29244	SOX9_B1	0.15545
ER	0.24911	MMEF2	0.18837	STAT5B	0.1434	VBP	0.14282	SMAD3	0.14368	TTF1	0.15181	NRSF	0.18625	NERF	0.18418	FOXO3	0.13612	NERF	0.275	FOXO3	0.13802	SOX9_B1	0.35625	LMO2COM	0.35179	PBX1	0.1681	POU6F1	0.3841	E2F1DP1	0.1998	PEA3	0.14419	MYOGENIN	0.13493	CREL	0.2375	MYOGENIN	0.29059	P53_DECAMER	0.20413	NFKAPPAB	0.77574	MAF	0.16776	E2F1DP1	0.26786	MEIS1	0.15048
PAX	0.18596	MEF2	0.16301	VBP	0.10868	SOX9_B1	0.11319	PAX	0.12665	IRF1	0.14935	CEBPB	0.12792	NFE2	0.1742	STAT5B	0.11465	SZF11	0.25348	HEB	0.13413	MAF	0.15357	CIZ	0.25134	ZEC	0.13978	AP1FJ	0.34931	FAC1	0.16603	TTF1	0.12718	MIF1	0.12491	ZIC3	0.1375	RP58	0.23147	MYOGNF1	0.19878	ETS2	0.51252	PU1	0.14906	SOX5	0.25218	NKX61	0.15048
ZEC	0.1654	STAT5A	0.15556	RSRFC4	0.10087	TAL1BETAE47	0.1088	FOXO1	0.11443	GFI1	0.14198	MYOD	0.12583	EGR3	0.15106	BRACH	0.10751	XBP1	0.2428	E2F1DP1	0.13225	LHX3	0.14911	AFP1	0.22896	COREBINDINGFACTOR	0.13971	TEF	0.25365	STAT4	0.15994	E2F1	0.11454	ZNF219	0.11751	STAT6	0.10518	SOX9_B1	0.22486	SMAD4	0.18353	TATA	0.32173	NFKB	0.1297	NFY	0.22689	GRE	0.13862
ZID	0.13884	HNF4ALPHA	0.13725	HMX1	0.08802	OCT	0.09236	TAL1BETAITF2	0.08109	PEBP	0.11886	VBP	0.11557	TAL1ALPHAE47	0.15027	PBX	0.1074	GCM	0.19315	SZF11	0.1226	NFE2	0.13554	RSRFC4	0.22768	CMAF	0.12772	STAT5B	0.20616	PAX9	0.1528	RORA1	0.11221	STAT4	0.11581	NGFIC	0.09857	CDPCR1	0.2023	TAL1BETAE47	0.16484	IRF1	0.25	VMYB	0.11991	LBP1	0.20336	PAX6	0.13702
RORA1	0.11819	SOX5	0.12269	PAX8	0.07986	NFKAPPAB65	0.07986	NRF2	0.07698	TBX5	0.11652	PAX3	0.11125	NMYC	0.13204	TCF11MAFG	0.10021	RUSH1A	0.18758	TBP	0.12019	MOVOB	0.13527	NFKAPPAB65	0.18218	NGFIC	0.11963	CDX	0.20213	PTF1BETA	0.15232	MYCMAX	0.09035	E2F1DP1	0.11286	STAT1	0.09232	FREAC7	0.19455	LFA1	0.16022	PBX	0.19158	HNF4	0.11053	MYOGENIN	0.17479	STAT3	0.13013
TCF11MAFG	0.0935	CEBP	0.11556	ZTA	0.07847	XVENT1	0.0647	TAL1BETAE47	0.07447	NFKAPPAB65	0.11359	SRF	0.08125	VMAF	0.0971	E12	0.09844	TST1	0.18254	TAL1	0.0899	CDX	0.13426	CDPCR3HD	0.17072	GRE	0.11148	HEB	0.18069	STAF	0.15133	SREBP1	0.08358	LHX3	0.08493	EGR1	0.0875	XFD2	0.18894	HEB	0.13848	ZIC3	0.1683	MEF2	0.10508	CDC5	0.10399	STAT6	0.12179
POU1F1	0.07567	MYOGNF1	0.11481	HOX13	0.07624	XFD3	0.06296	XFD3	0.07269	GCNF	0.09871	XFD3	0.07777	SPZ1	0.09149	STAT6	0.0959	RFX1	0.18152	ETS2	0.08894	SRY	0.12308	TAL1BETAITF2	0.16429	LFA1	0.1081	ATF4	0.14028	PBX	0.13834	ELK1	0.07558	MEIS1BHOXA9	0.06702	HSF2	0.08687	VMYB	0.16394	LMO2COM	0.11826	MYOGENIN	0.14902	NFKAPPAB65	0.09023	RP58	0.10294	APOLYA	0.11947
VJUN	0.06964	BRACH	0.1041	SOX5	0.07097	HTF	0.05556	ZEC	0.06922	HIF1	0.09073	PBX1	0.07187	EGR	0.08936	HOXA7	0.08873	ARP1	0.16834	NKX62	0.08764	RSRFC4	0.10393	XVENT1	0.15804	HNF4_DR1	0.10068	FOXM1	0.11111	SPZ1	0.1247	SMAD3	0.07238	CEBPGAMMA	0.06397	VJUN	0.08594	XFD3	0.15172	SMAD	0.11304	NRF2	0.14052	STAT6	0.08797	NFKAPPAB65	0.10184	TITF1	0.11699
ATF4	0.06004	PAX8	0.10278	TAL1BETAITF2	0.06875	STAT6	0.05324	RFX	0.06596	TEF	0.08435	NFAT	0.06813	MEIS1BHOXA9	0.08906	SP1	0.08265	MAX	0.16807	TEF	0.07596	MYOD	0.10313	WT1	0.14241	CLOX	0.09117	CEBPA	0.11111	TFE	0.10655	NKX62	0.07068	STAT1	0.06206	OTX	0.08281	STAT5B	0.15043	NRSF	0.11304	BRACH	0.13811	HOXA4	0.08722	TBP	0.09832	TBX5	0.11538
CEBPA	0.06	T3R	0.08704	ICSBP	0.06442	RFX1	0.05287	IRF7	0.06149	FOXM1	0.07717	PEA3	0.06667	GCNF	0.08777	LBP1	0.0824	PEA3	0.16674	HES1	0.07425	BACH2	0.10045	RORA1	0.13996	VMYB	0.08641	OSF2	0.11111	RSRFC4	0.10222	MINI19	0.0693	ATF3	0.05888	SPZ1	0.07214	PEA3	0.1409	CREBP1CJUN	0.10326	IRF	0.13529	NFKAPPAB50	0.08163	PU1	0.09632	PTF1BETA	0.10577
HNF4	0.0587	WT1	0.08519	LBP1	0.06267			EGR1	0.05766	STAT3	0.07609	HNF6	0.05667	RP58	0.08766	NFAT	0.07865	MYC	0.15605	RORA1	0.07139	TAL1ALPHAE47	0.09509	TFIIA	0.13857	GZF1	0.08441	PEA3	0.10903	SRF	0.09839	GABP	0.06292	HNF3ALPHA	0.05879	GATA4	0.06652	NFKAPPAB50	0.13333	MYOGENIN	0.09348	TCF11	0.12488	AML	0.08064	E2F1	0.09422	EGR3	0.1039
BRN2	0.05647	TBP	0.07963	NFKAPPAB65	0.06042			SOX5	0.05489	MEIS1AHOXA9	0.07575	ZTA	0.05604	E2A	0.07489	TBP	0.07747	MYOD	0.13679	FOXD3	0.07001	STAT1	0.09365	EGR	0.12294	ATF1	0.08114	VBP	0.10681	DELTAEF1	0.07429	ATF3	0.06286	TST1	0.05878	HELIOSA	0.06429	CDC5	0.12356	GRE	0.0894	STAT1	0.10621	PITX2	0.07213	TST1	0.08535	LPOLYA	0.08974
GRE	0.05473	PPARA	0.07407	LMO2COM	0.0592					AP2GAMMA	0.06862	EGR3	0.05604	SP3	0.07218	TAL1BETAITF2	0.07306	GEN_INI	0.13288	TAACC	0.06707	CRX	0.08125	ELF1	0.12009	VMAF	0.07469	TBP	0.1066	IK1	0.07393	GC	0.0578	RUSH1A	0.05874	PPARA	0.06357	NKX3A	0.1227	ZID	0.08152	MOVOB	0.1056	ETS	0.06203	TFIII	0.08256	SZF11	0.08634
MAX	0.05169	NRSF	0.07368	2014-10-01	0.05792					TAL1	0.06861	HMGIY	0.05425	TEF	0.06862	IRF1	0.06361	SMAD3	0.13288	MEIS1AHOXA9	0.06363	SEF1	0.07143	TBP	0.11674	SOX9_B1	0.07218	PIT1	0.10204	IRF1	0.06901	ETF	0.05375	TAL1BETAE47	0.05836	LXR_DR4	0.06348	TST1	0.11809	TEF1	0.0813	STAT	0.10458	CACD	0.05827	HMEF2	0.0802	VBP	0.08207
		USF	0.07269	GATA4	0.05549					CMAF	0.06522	ETS1	0.0526	ETS2	0.06766	2014-10-04	0.06068	TAL1BETAE47	0.13013	HSF	0.06202	TFE	0.0625	ZID	0.1154	TCF11MAFG	0.06617	ERR1	0.09787	TEL2	0.06446	STAF	0.05349	FREAC2	0.05772	TAL1BETAE47	0.06204	P53_DECAMER	0.11695	MMEF2	0.07891	PU1	0.09379	SRY	0.05789	HNF3ALPHA	0.07689	HP1SITEFACTOR	0.08061
		CHOP	0.06701	CLOX	0.05512					CEBPDELTA	0.06366	BRN2	0.052	USF	0.06682	POLY	0.05898	MEIS1	0.12174	GFI1B	0.05673	CDC5	0.05723	MAX	0.10949	VBP	0.06495	GLI	0.0892	DEC	0.06402	E2A	0.05218	MMEF2	0.05703	MEF2	0.05946	TITF1	0.10973	PADS	0.07748	PEA3	0.08922	PAX3	0.05752	E2F	0.07563	E2F1	0.07692
		LMO2COM	0.05861	POLY	0.05133					NRSF	0.06195			ATF1	0.06489	BEL1	0.05806	GFI1B	0.11403	DTYPEPA	0.05144	NKX62	0.05419	TFE	0.10062	XBP1	0.06185	MSX1	0.08849	LPOLYA	0.06177			PLZF	0.05643	STAT5A	0.05768	TEF1	0.10733	NF1	0.07652	LEF1TCF1	0.08448	OSF2	0.05376	NFAT	0.07426	MIF1	0.07019
		HLF	0.0559	NRSE	0.05061					COUP_DR1	0.06046			MUSCLE_INI	0.06064	ZNF219	0.05708	MYOGENIN	0.10078					HMEF2	0.10033	STAT	0.05598	ELK1	0.07535	LDSPOLYA	0.06015			HSF2	0.05579	MOVOB	0.05223	HEB	0.0977	RFX1	0.07399	USF	0.08194	PR	0.05371	TAL1	0.07227	LMO2COM	0.0609
		SRF	0.05278							RORA1	0.0602					FOXP3	0.05621	E2F4DP1	0.09977					GFI1B	0.09594	HMX1	0.05386	ATF3	0.06683	NFKAPPAB50	0.05984			NFKAPPAB65	0.05515	FREAC7	0.05009	NANOG	0.08851	PAX4	0.07325	ZNF219	0.07582	IRF1	0.05357	OCT	0.07164	SRF	0.0609
		AP4	0.05179							STAT4	0.05985					P53	0.05479	WT1	0.08514					COMP1	0.08968	VJUN	0.05088	EBOX	0.06615	GFI1B	0.05403			STAT6	0.05055			CDPCR3HD	0.08348	SMAD3	0.07063	BACH1	0.07459	ZF5	0.05284	VJUN	0.07038	TAXCREB	0.0599
																PADS	0.05389	SMAD4	0.08381					RP58	0.08158			HTF	0.06605	LBP1	0.05396			FOX	0.05011			CEBPGAMMA	0.07956	PEA3	0.06793	ZIC2	0.07394	LBP1	0.05188	HP1SITEFACTOR	0.06765	ATF1	0.05929
																CHX10	0.05181	ZBRK1	0.07908					NKX62	0.07812			P53	0.06414	MOVOB	0.05269							FAC1	0.07902	OCT	0.06543	POU6F1	0.06699	PAX6	0.05113	NFMUE1	0.06723	TAL1	0.05897
																TCF4	0.05163	CDPCR3	0.07717					GATA4	0.07025			HNF4ALPHA	0.06146	NKX61	0.05206							GEN_INI	0.07874	VJUN	0.06359	LMO2COM	0.06658			YY1	0.06471	VJUN	0.05361
																ACAAT	0.05045	LRF	0.07587					OSF2	0.06875			MIF1	0.05041									TAL1BETAITF2	0.07471	ZIC3	0.06304	SREBP	0.06393			LEF1	0.06471	GZF1	0.05288
																		PBX1	0.06929					HOXA4	0.06116													ZNF219	0.07228	TTF1	0.05973	AML	0.06319			E2F1DP2	0.06397	TEF	0.05138
																		XFD3	0.06842					NF1	0.0606													IK1	0.07155	E2	0.05815	SRF	0.05376			RSRFC4	0.06218
																		CDPCR3HD	0.06728					PAX9	0.06016													SMAD3	0.06897	SF1	0.05315	RORA1	0.05351			GRE	0.06103
																		GEN_INI2	0.06671					ZBRK1	0.05071													COUP	0.0681	STAT	0.05217	MIF1	0.05229			AIRE	0.06092
																		IRF	0.06624																			NFKB	0.06753	EGR3	0.05217	TBP	0.05229			NFKAPPAB50	0.06082
																		E2F1DP1	0.06464																			RBPJK	0.06552			CETS1P54	0.05185			SZF11	0.05966
																		PADS	0.05793																			P53	0.06322			LBP1	0.0509			LEF1TCF1	0.05777
																		HMGIY	0.05435																			AP2REP	0.06178			TFIIA	0.05059			XFD3	0.0563
																		SOX9_B1	0.05326																			VJUN	0.05744							2014-10-04	0.05609
																		STAT4	0.05326																			CDPCR3	0.05665							NKX25	0.05546
																																						HELIOSA	0.05603							TAL1BETAE47	0.05441
																																						HSF2	0.05582
																																						STAT	0.05144
																																						GRE	0.05072
[truncated: 118 more columns]

## Sheet: 48up
00010: Glycolysis / Gluconeogenesis（20）		00051: Fructose and mannose metabolism（20）		00053: Ascorbate and aldarate metabolism（26）		00071: Fatty acid metabolism（15）		00260: Glycine, serine and threonine metabolism（20）		00270: Cysteine and methionine metabolism（11）		00280: Valine, leucine and isoleucine degradation（20）		00310: Lysine degradation（26）		00340: Histidine metabolism（23）		00360: Phenylalanine metabolism（18）		00380: Tryptophan metabolism（32）		00511: Other glycan degradation（13）		00533: Glycosaminoglycan biosynthesis - keratan sulfate（23）		00562: Inositol phosphate metabolism （27）		00591: Linoleic acid metabolism（13）		00592: alpha-Linolenic acid metabolism（20）		00603: Glycosphingolipid biosynthesis - globo series（19）		00620: Pyruvate metabolism（29）		00640: Propanoate metabolism（23）		00670: One carbon pool by folate（26）		00760: Nicotinate and nicotinamide metabolism（23）		00770: Pantothenate and CoA biosynthesis（19）		00790: Folate biosynthesis（28）		00980: Metabolism of xenobiotics by cytochrome P450（15）		00982: Drug metabolism - cytochrome P450（13）
TF	Importance	TF	Importance	IRF1	0.23192	TF	Importance	TF	Importance	TF	Importance	TF	Importance	TF	Importance	TF	Importance	TF	Importance	TF	Importance	TF	Importance	TF	Importance	TF	Importance	TF	Importance	TF	Importance	TF	Importance	TF	Importance	TF	Importance	TF	Importance	TF	Importance	TF	Importance	TF	Importance	TF	Importance	TF	Importance
GRE	0.19065	YY1	0.22581	NMYC	0.21214	VBP	0.29608	HNF4_DR1	0.45722	MOVOB	0.35194	ATF1	0.31795	TFIIA	0.18507	SMAD3	0.2279	RFX	0.45071	TST1	0.38728	PEBP	0.1263	PEA3	0.22297	HNF4ALPHA	0.27689	HNF3ALPHA	0.22965	SEF1	0.86282	PBX1	0.18029	POLY	0.28472	RFX	0.57589	XFD3	0.2337	GATA4	0.25462	VBP	0.19152	GLI	0.18285	DR3	0.29483	LYF1	0.25243
VBP	0.18125	TFE	0.17802	SOX9_B1	0.20759	STAT5B	0.15625	CDPCR3HD	0.18105	SOX9_B1	0.2619	ZTA	0.1492	STAT	0.14444	MYB	0.16761	VMAF	0.30134	CDPCR3HD	0.31098	HFH8	0.11697	CREBATF	0.19115	CDPCR3HD	0.22209	FOXO3	0.15139	MYOGENIN	0.3485	TFE	0.15048	NFKB	0.17986	ZTA	0.31897	CHCH	0.21779	PEA3	0.16197	CDX	0.14286	EBOX	0.15546	FOXO3	0.22776	CETS168	0.13703
SOX9_B1	0.17455	NANOG	0.15645	HOXA4	0.20039	IRF1	0.10872	VBP	0.175	MYCMAX	0.23414	VBP	0.12757	TBP	0.14033	HFH8	0.15256	MAX	0.28821	POLY	0.21453	EGR2	0.09346	TEL2	0.1474	ETS	0.20252	FXR	0.14463	XPF1	0.32125	FOXO3	0.13802	WT1	0.17807	IK1	0.18278	ETS2	0.20458	ATF1	0.15724	HOXA4	0.14196	SOX9_B1	0.154	LYF1	0.21639	PPAR_DR1	0.1
POLY	0.17273	MYCMAX	0.14889	TTF1	0.14152	RP58	0.09557	HFH8	0.1312	HNF3	0.13416	LEF1	0.12389	POLY	0.13084	TCF4	0.1525	MYOD	0.19143	SMAD3	0.17399	ZBRK1	0.08333	PBX1	0.14414	NKX62	0.1286	RORA1	0.13768	BRN2	0.15633	HEB	0.13413	NFAT	0.15373	LEF1	0.17089	LRF	0.17955	MEIS1BHOXA9	0.13145	RFX1	0.11752	HP1SITEFACTOR	0.11031	CETS168	0.09569	FOXO3	0.09358
SP3	0.14386	FOXO3	0.10935	PLZF	0.14107	SOX9_B1	0.09519	TEL2	0.11458	MAZ	0.11243	S8	0.12188	NKX62	0.12057	VBP	0.14386	P53_DECAMER	0.17723	TCF4	0.16973	BACH2	0.07461	VBP	0.14225	LHX3	0.1259	OSF2	0.13501	ATF6	0.13758	E2F1DP1	0.13225	NFKAPPAB65	0.13183	OSF2	0.16138	MYC	0.15714	CDPCR3	0.10697	SOX9_B1	0.10611	VJUN	0.09858	E12	0.08772	RFX1	0.0845
STAT5B	0.12693	GEN_INI2	0.09969	OSF2	0.13707	NKX62	0.09135	SP1	0.1145	VDR	0.11099	NFMUE1	0.09977	PBX1	0.1191	STAT5B	0.12707	SRY	0.16536	HOXA4	0.15988	P53	0.06743	MYOD	0.12656	TBP	0.11653	PPAR_DR1	0.13405	AP2GAMMA	0.13203	SZF11	0.1226	SOX9_B1	0.12736	XVENT1	0.12692	ETS1	0.15552	CEBPDELTA	0.10489	TEF	0.10437	XBP1	0.09696	PTF1BETA	0.08345	CEBPB	0.08371
CEBPB	0.12682	GABP	0.08048	MEIS1	0.12321	PBX1	0.0842	PAX2	0.08528	E2F1DP2	0.10379	LHX3	0.09893	SOX9_B1	0.11736	PPARG	0.12629	NFE2	0.12902	ICSBP	0.15604	NKX3A	0.06741	ETS	0.115	ZTA	0.11017	SRF	0.12903	TBX5	0.11563	TBP	0.12019	BARBIE	0.10943	EVI1	0.12637	GATA1	0.14295	PPARG	0.09178	XVENT1	0.09554	IK1	0.096	TAL1BETAE47	0.07765	FOXO4	0.07243
PAX	0.12159	DR3	0.07046	GATA3	0.11732	FOXO4	0.0829	EGR	0.08438	PPARA	0.10351	SOX9_B1	0.08912	NERF	0.10564	GRE	0.10564	SOX5	0.12679	LMO2COM	0.14265	MINI19	0.06659	HEB	0.10313	MMEF2	0.10158	HNF4_DR1	0.12826	RORA1	0.10319	TAL1	0.0899	NANOG	0.10427	VBP	0.12366	MAX	0.12567	STAT5B	0.08993	NFKAPPAB65	0.09141	FOXD3	0.09172	CEBPB	0.07656	TCF11	0.07164
PAX2	0.12136	OLF1	0.06484	ZNF219	0.11647	TCF4	0.06862	LHX3	0.07882	E2A	0.07491	GATA4	0.08685	MEIS1AHOXA9	0.09363	AP2ALPHA	0.1043	TAL1	0.11	IK3	0.13751	E4BP4	0.06348	NFE2	0.09743	VJUN	0.09958	AP2GAMMA	0.10526	EBOX	0.08322	ETS2	0.08894	SEF1	0.10208	PEA3	0.12098	E2F4DP1	0.11405	CREBP1CJUN	0.08243	HMEF2	0.08996	XFD1	0.0825	ERR1	0.07319	LXR	0.06903
CEBPDELTA	0.10213	TAXCREB	0.06448	POU1F1	0.10893	ATF1	0.06785	IK3	0.07539	E2F1DP1RB	0.05884	RSRFC4	0.08331	GATA3	0.09132	SOX9_B1	0.09529	VBP	0.10977	STAT	0.13716	FOXD3	0.05938	XFD1	0.08661	CEBP	0.09958	GATA1	0.07592	CDPCR3	0.08144	NKX62	0.08764	HOXA4	0.10157	SOX9_B1	0.10554	FOXO3	0.09748	STAT3	0.07829	LHX3	0.08722	PAX4	0.08179	PPAR_DR1	0.06151	ERR1	0.0653
LEF1	0.08909	LUN1	0.0631	ZTA	0.10714	STAT3	0.06667	HLF	0.07285	E2F4DP2	0.05379	WT1	0.0825	TTF1	0.08958	OCT	0.09432	FOXO3	0.10975	ZIC1	0.1314	GEN_INI	0.05833	LMO2COM	0.08396	TCF11	0.09831	TCF4	0.06565	AMEF2	0.08	TEF	0.07596	EVI1	0.09635	S8	0.10152	USF2	0.0942	PAX2	0.07668	HFH1	0.08058	OTX	0.07875	VJUN	0.06008	NRF2	0.0651
KAISO	0.08	PPAR_DR1	0.06234	TAL1BETAITF2	0.1058	AP2ALPHA	0.05903	FOXO3	0.0725			GLI	0.08176	HEN1	0.075	MZF1	0.08938	AP2REP	0.09681	PBX1	0.12264	SP3	0.05768	GATA6	0.08323	LDSPOLYA	0.09347	RFX1	0.05574	VMAF	0.07312	HES1	0.07425	P53_DECAMER	0.09618	POLY	0.0971	CREBP1	0.09164	HSF1	0.07492	XFD2	0.06696	FREAC3	0.07797	TTF1	0.05884	ETS	0.06164
MAZR	0.06865	P300	0.0623	SPZ1	0.09771	XFD1	0.05868	CDC5	0.07146			HOXA4	0.07528	HOXA4	0.0749	SMAD4	0.07918	MOVOB	0.08795	PR	0.10139	RSRFC4	0.05177	RORA1	0.08318	OCT	0.09301	AMEF2	0.05517	HNF3ALPHA	0.07063	RORA1	0.07139	TCF11MAFG	0.09583	RSRFC4	0.08944	E2F1DP1RB	0.08758	HNF4_DR1	0.06859	CAAT	0.06458	CDPCR3HD	0.07719	NCX	0.05232	VJUN	0.05611
LFA1	0.06534	COMP1	0.0621	MZF1	0.09549	CEBPB	0.05382	COMP1	0.0708			EBOX	0.07125	XVENT1	0.07465	OSF2	0.07763	FREAC3	0.08036	STAT3	0.10017			POLY	0.08277	EBOX	0.0911			EFC	0.06656	FOXD3	0.07001	LUN1	0.09212	CAAT	0.08687	GLI	0.08718	EGR1	0.06734	ERR1	0.05915	NKX3A	0.07575	SRF	0.05185
FREAC7	0.06321	STAT4	0.06163	AFP1	0.08789	POLY	0.05069	CREBATF	0.0668			NFY	0.07	FOXO4	0.07049	RFX	0.07628	CDPCR3HD	0.07766	FOXO4	0.09966			XFD3	0.08255	CEBPA	0.08859			NFE2	0.06563	TAACC	0.06707	VBP	0.08394	GATA3	0.08549	HFH8	0.07433	TAL1ALPHAE47	0.06693	GCM	0.05865	OCT	0.07524	ZIC1	0.05124
OSF2	0.06089	XFD3	0.06103	PAX2	0.08387			CEBPDELTA	0.05699			EVI1	0.06029	HOXA7	0.06993	LMO2COM	0.07287	XPF1	0.06406	HNF4ALPHA	0.08887			E2F1DP1	0.08076	RORA1	0.08644			MAF	0.06	MEIS1AHOXA9	0.06363	ZBRK1	0.0816	TEF	0.07579	FREAC2	0.07333	MEIS1	0.06635	EGR2	0.05393	AP3	0.07412
TAL1BETAE47	0.0605	POU6F1	0.05937	HFH8	0.07969			NFKAPPAB	0.05417			CDX	0.05868	PBX	0.06833	FREAC2	0.07272	RORA1	0.06266	SOX9_B1	0.07986			AP4	0.07687	RSRFC4	0.08178			MAX	0.05941	HSF	0.06202	MYOGNF1	0.07812	MYOGNF1	0.06875	MEIS1AHOXA9	0.07143	MEIS1AHOXA9	0.05994	HFH8	0.05348	RORA1	0.07279
PBX1	0.05695	UF1H3BETA	0.05685	COUP_DR1	0.0772			RORA2	0.05403			MYB	0.05518	XBP1	0.06833	BRN2	0.07202	AHRHIF	0.05795	IRF7	0.07922			MEIS1	0.07552	FOXO1	0.07538			HMEF2	0.05633	GFI1B	0.05673	TCF11	0.07431	MZF1	0.06116	SOX9_B1	0.07054	CREBATF	0.05664	XFD3	0.05312	GZF1	0.06975
TAL1	0.05635	LBP1	0.05412	TCF4	0.06696			ZIC1	0.05389			CEBPA	0.05256	MAX	0.0651	MOVOB	0.06903			GATA4	0.07895			TFE	0.07031	YY1	0.07458			TITF1	0.05531	DTYPEPA	0.05144	COMP1	0.06771	AP3	0.05586	HP1SITEFACTOR	0.07009	MYCMAX	0.05537	ETS2	0.05	ROAZ	0.06969
SOX	0.05455	HNF4	0.05353	NCX	0.06607			SPZ1	0.05097			PPAR_DR1	0.05065	SMAD3	0.06493	GATA3	0.0614			LXR	0.07277			SOX5	0.06146	ZID	0.07203			CREBP1	0.05019			CDXA	0.06684	TST1	0.05553	ROAZ	0.07009	ETS2	0.05436			CRX	0.06803
				HEN1	0.06537									VJUN	0.05406	NFKAPPAB65	0.05898			TCF11MAFG	0.0723			HNF3ALPHA	0.05964	P53	0.07076							AFP1	0.06405	GATA4	0.05469	TAL1BETAITF2	0.06793	OTX	0.05259			MINI20	0.0675
				MYOD	0.06096									RFX1	0.05337	MYOGENIN	0.05636			IK1	0.07105			HSF	0.05677	GR	0.06708							POU1F1	0.06403	NFKB	0.05218	HOX13	0.0642	HSF2	0.05145			CREBP1	0.06072
				SMAD3	0.05572									SF1	0.05278	NKX61	0.05418			HOXA3	0.07086			ETS1	0.05277	ETS2	0.06632							EFC	0.06163	HOXA3	0.05067	TEL2	0.06414	FAC1	0.05113			HEB	0.05984
				CREBATF	0.05558									ZNF219	0.05089					HSF2	0.06672					RBPJK	0.06081							LMO2COM	0.06146			CLOX	0.05535					DTYPEPA	0.05755
				ICSBP	0.05549									TCF11	0.05061					BRN2	0.06522					MYOD	0.05932							BRN2	0.05799			AP2GAMMA	0.05462					STAT4	0.05594
				BRN2	0.05268									CDPCR3HD	0.05008					CREL	0.06291					GEN_INI	0.05695							STAT5B	0.05634			VBP	0.05446					NKX62	0.05525
																				MEIS1BHOXA9	0.06284					TCF4	0.05593							RFX1	0.05625									BRACH	0.05477
																				PPARG	0.0625													PITX2	0.05521									MYB	0.05125
																				LHX3	0.0601													MEF2	0.05007
																				P53_DECAMER	0.05752
																				PPARA	0.05166
																				VBP	0.05
[truncated: 50 more columns]

## Sheet: 48down
00020: Citrate cycle (TCA cycle)（16）		00030: Pentose phosphate pathway（14）		00040: Pentose and glucuronate interconversions（22）		00052: Galactose metabolism（19）		00100: Steroid biosynthesis（22）		00120: Primary bile acid biosynthesis（19）		00140: Steroid hormone biosynthesis（19）		00230: Purine metabolism（23）		00250: Alanine, aspartate and glutamate metabolism（22）		00290: Valine, leucine and isoleucine biosynthesis（30）		00500: Starch and sucrose metabolism（12）		00510: N-Glycan biosynthesis（17）		00512: Mucin type O-Glycan biosynthesis（22）		00514: Other types of O-glycan biosynthesis（18）		00532: Glycosaminoglycan biosynthesis - chondroitin sulfate（16）		00534: Glycosaminoglycan biosynthesis - heparan sulfate（25）		00561: Glycerolipid metabolism（15）		00590: Arachidonic acid metabolism（21）		00604: Glycosphingolipid biosynthesis - ganglio series（19）		00630: Glyoxylate and dicarboxylate metabolism（30）		00650: Butanoate metabolism（22）		00860: Porphyrin and chlorophyll metabolism（17）		00900: Terpenoid backbone biosynthesis（22）		00910: Nitrogen metabolism（20）		00970: Aminoacyl-tRNA biosynthesis（7）
TF	Importance	TF	Importance	TF	Importance	TF	Importance	TF	Importance	TF	Importance	TF	Importance	TF	Importance	TF	Importance	TF	Importance	TF	Importance	TF	Importance	TF	Importance	TF	Importtance	TF	Importance	TF	Importance	TF	Importance	TF	Importance	TF	Importance	TF	Importance	TF	Importance	TF	Importance	TF	Importance	TF	Importance	TF	Importance
SF1	0.45578	S8	0.16932	ZTA	0.33917	IRF2	0.21536	NKX3A	0.30944	STAT5B	0.29352	SOX9_B1	0.36888	LEF1	0.29516	STAT	0.23889	TAL1	0.19974	MEIS1BHOXA9	0.23524	ETS2	0.46918	HOX13	0.28145	XBP1	0.25833	ZEC	0.42236	FREAC2	0.29069	RFX1	0.14448	OSF2	0.42829	HEB	0.44063	S8	0.63223	TBP	0.24076	TCF11MAFG	0.19733	NFY	0.4225	MTF1	0.20822	CHOP	0.12384
TAL1BETAITF2	0.28705	NKX22	0.12571	PAX	0.23886	AFP1	0.1827	LUN1	0.28085	XFD3	0.22788	AR	0.36145	CEBP	0.21452	POLY	0.22993	SOX9_B1	0.1826	LEF1	0.15556	SMAD3	0.28718	TCF4	0.19158	RFX1	0.22108	E12	0.17467	E12	0.28071	NKX25	0.12326	VJUN	0.22517	CHCH	0.42813	SF1	0.35893	POLY	0.18696	PTF1BETA	0.19655	CDX	0.2	ATF3	0.19008	STAT3	0.11333
ER	0.24911	2014-10-04	0.11768	SOX9_B1	0.19181	MYOGENIN	0.11615	PAX1	0.26326	NFKAPPAB65	0.19663	NFAT	0.15757	RSRFC4	0.20323	MMEF2	0.18837	OSF2	0.16727	VBP	0.14282	PEA3	0.2054	TTF1	0.15181	NRSF	0.18625	SP3	0.16125	GATA	0.13505	ZTA	0.11661	PPARG	0.1402	SOX9_B1	0.35625	LMO2COM	0.35179	PBX1	0.1681	XVENT1	0.1581	ROAZ	0.15601	CEBPA	0.12371	BRACH	0.09245
PAX	0.18596	CDPCR1	0.11335	GR	0.11729	ELK1	0.10684	SREBP1	0.2575	XFD1	0.15769	POU1F1	0.12213	PEA3	0.18371	MEF2	0.16301	LHX3	0.14984	SOX9_B1	0.11319	TAL1BETAITF2	0.16562	IRF1	0.14935	CEBPB	0.12792	MYOD	0.15874	CHOP	0.12582	GATA3	0.10756	SRF	0.11934	MAF	0.15357	CIZ	0.25134	ZEC	0.13978	RUSH1A	0.11494	STAT5B	0.15076	SMAD4	0.10855	MEIS1	0.06611
ZEC	0.1654	MYOGENIN	0.10619	GEN_INI2	0.11431	SOX9_B1	0.10495	AHRHIF	0.1925	TFIIA	0.12476	XBP1	0.11622	STAT6	0.18371	STAT5A	0.15556	VBP	0.1316	TAL1BETAE47	0.1088	MAX	0.13274	GFI1	0.14198	MYOD	0.12583	SOX9_B1	0.14896	TTF1	0.11457	DR1	0.10224	NFKAPPAB50	0.11091	LHX3	0.14911	AFP1	0.22896	COREBINDINGFACTOR	0.13971	SOX	0.10052	VBP	0.14813	ZIC1	0.10268	NFKAPPAB65	0.06472
ZID	0.13884	AP2REP	0.10011	VBP	0.11071	NMYC	0.09172	P53	0.18643	CIZ	0.12214	TAL1BETAITF2	0.11037	STAT	0.16516	HNF4ALPHA	0.13725	VMYB	0.13003	OCT	0.09236	PAX	0.12852	PEBP	0.11886	VBP	0.11557	HFH8	0.14271	FOXO4	0.11039	EFC	0.08674	ZIC3	0.10997	NFE2	0.13554	RSRFC4	0.22768	CMAF	0.12772	SPZ1	0.09975	HEB	0.11859	CHOP	0.08848	SMAD3	0.06383
RORA1	0.11819	PPAR_DR1	0.08477	IRF1	0.11042	XFD3	0.0875	CREBATF	0.12057	CLOX	0.09228	CETS168	0.10414	PIT1	0.10565	SOX5	0.12269	ATF4	0.11069	NFKAPPAB65	0.07986	STAT5B	0.11548	TBX5	0.11652	PAX3	0.11125	AP2ALPHA	0.13423	MEIS1BHOXA9	0.10842	HSF2	0.07975	HNF3ALPHA	0.10811	MOVOB	0.13527	NFKAPPAB65	0.18218	NGFIC	0.11963	POLY	0.09905	IRF2	0.11141	FOXO3	0.08246	SOX	0.05556
TCF11MAFG	0.0935	HNF3B	0.07006	AFP1	0.10788	VMYB	0.08229	GATA	0.115	HNF3ALPHA	0.08137	STAT6	0.09848	SMAD	0.10419	CEBP	0.11556	AML	0.10836	XVENT1	0.0647	EGR1	0.08955	NFKAPPAB65	0.11359	SRF	0.08125	AP4	0.10547	TAL1BETAE47	0.09986	NFAT	0.07703	STAT	0.09637	CDX	0.13426	CDPCR3HD	0.17072	GRE	0.11148	GATA2	0.07241	CEBPA	0.0999	RUSH1A	0.07879
POU1F1	0.07567	TTF1	0.06976	STAT5A	0.1059	RORA1	0.07625	HOX13	0.10796	GCNF	0.07904	FREAC4	0.08716	ETS1	0.09484	MYOGNF1	0.11481	VJUN	0.10312	XFD3	0.06296	HSF1	0.08139	GCNF	0.09871	XFD3	0.07777	LBP1	0.09844	PAX5	0.0987	GFI1	0.07086	NFKAPPAB65	0.09459	SRY	0.12308	TAL1BETAITF2	0.16429	LFA1	0.1081	CREBATF	0.07188	AP1FJ	0.0999	HP1SITEFACTOR	0.07585
VJUN	0.06964	ER	0.06765	PITX2	0.10372	XVENT1	0.07122	ZIC3	0.10583	HSF1	0.07788	PTF1BETA	0.08703	NRF2	0.08617	BRACH	0.1041	ZNF219	0.10294	HTF	0.05556	NRF2	0.07733	HIF1	0.09073	PBX1	0.07187	MINI20	0.06341	DR4	0.0836	ROAZ	0.06872	FOXO4	0.09324	RSRFC4	0.10393	XVENT1	0.15804	HNF4_DR1	0.10068	STAT6	0.07121	OSF2	0.09938	PAX4	0.0748
ATF4	0.06004	RORA1	0.06264	BRACH	0.0875	VMAF	0.06953	LEF1TCF1	0.10543	PEBP	0.07692	IK1	0.08676	PAX	0.08065	PAX8	0.10278	P53	0.10278	STAT6	0.05324	CEBPGAMMA	0.07007	TEF	0.08435	NFAT	0.06813	SEF1	0.06159	SMAD3	0.08207	HSF1	0.06541	COUP	0.08378	MYOD	0.10313	WT1	0.14241	CLOX	0.09117	NFAT	0.07047	POU6F1	0.09938	ETS1	0.06833
CEBPA	0.06	CLOX	0.06108	TST1	0.07812	USF	0.06523	ACAAT	0.08951	NGFIC	0.07649	MUSCLE_INI	0.08216	XVENT1	0.07903	T3R	0.08704	IK3	0.10188	RFX1	0.05287	PBX1	0.06804	FOXM1	0.07717	PEA3	0.06667	OTX	0.06094	AP2ALPHA	0.08174	ERR1	0.05849	STAT3	0.08041	BACH2	0.10045	RORA1	0.13996	VMYB	0.08641	NERF	0.0655	PAX	0.09703	OLF1	0.06125
HNF4	0.0587	RFX1	0.05994	TTF1	0.07569	TAXCREB	0.06263	E4BP4	0.08833	ACAAT	0.07443	SRF	0.08176	IK1	0.07871	WT1	0.08519	POU1F1	0.08837			TAL1BETAE47	0.06676	STAT3	0.07609	HNF6	0.05667	SMAD4	0.05938	TFIII	0.08144	EGR	0.05754	RFX1	0.07973	TAL1ALPHAE47	0.09509	TFIIA	0.13857	GZF1	0.08441	NKX25	0.06441	FREAC3	0.085	BRACH	0.06068
BRN2	0.05647	HNF4ALPHA	0.05775	NFAT	0.07191	ZF5	0.06234	CMYB	0.08442	OSF2	0.06218	CHCH	0.07879	BRCA	0.07601	TBP	0.07963	CLOX	0.08767			SOX5	0.06588	MEIS1AHOXA9	0.07575	ZTA	0.05604	LDSPOLYA	0.05635	AIRE	0.07999	BARBIE	0.05596	MAF	0.07378	STAT1	0.09365	EGR	0.12294	ATF1	0.08114	PITX2	0.06293	IK3	0.08137	CREBATF	0.05898
GRE	0.05473			STAT	0.0684	VBP	0.06203	FOXO4	0.08399	ETS1	0.05924	PAX6	0.07482	RFX1	0.06323	PPARA	0.07407	NRF2	0.08264			NRSF	0.05518	AP2GAMMA	0.06862	EGR3	0.05604	LYF1	0.0541	OTX	0.07894	E2F1DP1	0.05061	MYC	0.06283	CRX	0.08125	ELF1	0.12009	VMAF	0.07469	CDX2	0.06233	IK1	0.07803	MEIS1BHOXA9	0.05875
MAX	0.05169			NFE2	0.06806	SF1	0.05869	RSRFC4	0.07562	MEIS1	0.05913	IRF1	0.07061	HEB	0.0621	NRSF	0.07368	KAISO	0.07708			XFD3	0.05483	TAL1	0.06861	HMGIY	0.05425	GATA	0.05029	RORA1	0.07138			DR1	0.06267	SEF1	0.07143	TBP	0.11674	SOX9_B1	0.07218	GEN_INI	0.06061	GCM	0.07063	TCF4	0.05792
				TAL1BETAITF2	0.06632	FOXO3	0.05705	LXR_DR4	0.07134	GZF1	0.05841	NFKAPPAB65	0.06213	HMGIY	0.06185	USF	0.07269	CRX	0.07433			NFKAPPAB65	0.05391	CMAF	0.06522	ETS1	0.0526			TFIIA	0.06673			NFE2	0.0625	TFE	0.0625	ZID	0.1154	TCF11MAFG	0.06617	OSF2	0.06013	GLI	0.07047	LEF1TCF1	0.05703
				STAT6	0.06059	MEIS1BHOXA9	0.05172	PAX4	0.06453	CREBP1	0.05715	NFY	0.05636	TEL2	0.05806	CHOP	0.06701	NKX22	0.06892					CEBPDELTA	0.06366	BRN2	0.052			SOX	0.05911			XFD2	0.05966	CDC5	0.05723	MAX	0.10949	VBP	0.06495			CDPCR3HD	0.06672	EGR2	0.05636
				CEBPDELTA	0.05556	ELF1	0.05026	MYC	0.06167	FOXO3	0.05324	SZF11	0.05118	STAT4	0.05758	LMO2COM	0.05861	OTX	0.06771					NRSF	0.06195					HAND1E47	0.05679			NFAT	0.0573	NKX62	0.05419	TFE	0.10062	XBP1	0.06185			GATA6	0.0632	EBOX	0.05445
				WT1	0.05239			TFE	0.06117					LXR_DR4	0.05742	HLF	0.0559	TCF11MAFG	0.06727					COUP_DR1	0.06046					CREBP1	0.0565			MYOGENIN	0.0549			HMEF2	0.10033	STAT	0.05598			HTF	0.06094	FOXD3	0.05
				RUSH1A	0.05055			STRA13	0.0575					HNF6	0.05548	SRF	0.05278	BRCA	0.06667					RORA1	0.0602					TAL1	0.05522			RORA1	0.0516			GFI1B	0.09594	HMX1	0.05386			MIF1	0.05975
				SPZ1	0.05043			NRF2	0.05517					NFAT	0.05371	AP4	0.05179	HOX13	0.06628					STAT4	0.05985					S8	0.055							COMP1	0.08968	VJUN	0.05088			ATF4	0.05719
														TBX5	0.05247			E2A	0.06454											ATF3	0.05094							RP58	0.08158
																		NERF	0.06042											VBP	0.05074							NKX62	0.07812
																		ZIC3	0.05778											XFD2	0.05027							GATA4	0.07025
																		POLY	0.05747																			OSF2	0.06875
																		CDC5	0.05745																			HOXA4	0.06116
																		CMAF	0.05347																			NF1	0.0606
																		NRSF	0.05208																			PAX9	0.06016
																		WT1	0.05056																			ZBRK1	0.05071
[truncated: 176 more columns]
