# Supplementary material for: A comprehensive transcriptomic analysis of differentiating embryonic stem cells in response to the overexpression of Mesogenin 1
Source: Aging (Albany NY). 2016 Oct 6;8(10):2324–35. doi: 10.18632/aging.101049 (PMC5115891; doi:10.18632/aging.101049)
Supplement: Supplementary file 4 [file aging-08-2324-s004.xlsx]

## Sheet: 12h
12hr upregulated_Gene Symbol	12hr downregulated_Gene Symbol	12hr_Gene Symbol(3742)	12hr_Microarray overlap(356)
Adh1	Galnt1	Adh1	Fbp1
Adh7	Galnt3	Adh7	Gpi1
Adh5	Galnt4	Adh5	Hk2
Aldh1a1	Gcnt1	Aldh1a1	Ldha
Aldh2	St3gal1	Aldh2	Pgm2
Aldh3a1	St3gal2	Aldh3a1	Aldh1b1
Aldh3a2	St6galnac1	Aldh3a2	Gck
Aldoc	B4galt5	Aldoc	Acly
Bpgm	C1galt1c1	Bpgm	Gmds
Dld	Galntl5	Dld	Acadl
Eno1 /// Gm5506 /// LOC100503183	Galnt14	Eno1 /// Gm5506 /// LOC100503183	Cpt1a
Eno2	Gcnt3	Eno2	Gucy1a3
Eno3	Galntl2	Eno3	Polr3gl
Fbp2	C1galt1	Fbp2	Nme5
Fbp1	Galnt2	Fbp1	Cant1
G6pc	Galnt7	G6pc	Nt5c2
Gapdh	Galntl1	Gapdh	Adcy3
Gapdhs	Galnt10	Gapdhs	Pde2a
Gpi1	Galnt6	Gpi1	Pde8b
Hk1	Galnt12	Hk1	Adcy5
Hk2	Galnt11	Hk2	Npr2
Ldha	Galntl4	Ldha	Pde4d
Ldhb	Galntl6	Ldhb	Pde11a
Ldhc	Galnt13	Ldhc	Adcy10
Pck1	B3gnt6	Pck1	Cyp17a1
Pdha1	Alpl	Pdha1	Adcy6
Pdha2	Akp3	Pdha2	Adcy8
Pfkl	Alppl2	Pfkl	Adk
Pfkm	Dhfr	Pfkm	Fhit
Pgam1	Fpgs	Pgam1	Nme1
Pgk1	Gch1	Pgk1	Nme2
Pgk2	Ggh	Pgk2	Pde1b
Pkm2	Pts	Pkm2	Pde4b
Pklr	Spr	Pklr	Uck2
Tpi1	Alpi	Tpi1	Gad1
Adh4	Qdpr	Adh4	Gpt2
Pgam2	Cyp2a12	Pgam2	Bhmt
Pfkp	Cyp3a11	Pfkp	Tha1
Aldh9a1	Cyp3a13	Aldh9a1	Phgdh
Aldh1a3	Cyp3a16	Aldh1a3	Dnmt3a
Akr1a4	Ces1c	Akr1a4	Dnmt3b
Acss2	Ces1e	Acss2	Adi1
Pgm1	Hprt	Pgm1	Bcat1
Aldh3b1	Itpa	Aldh3b1	Bckdhb
Pdhb	Nat1	Pdhb	Hibadh
Acss1	Nat2	Acss1	Mccc2
Adpgk	Nat3	Adpgk	Setd1b
Pgm2	Tk1	Pgm2	Suv420h2
Aldh1b1	Tpmt	Aldh1b1	Nos1
Pck2	Ugt2b5	Pck2	Odc1
Gck	Uck1	Gck	Aldh18a1
Ldhal6b	Umps	Ldhal6b	Aanat
Aldh7a1	Upp1	Aldh7a1	Ccbl2
Hk3	Xdh	Hk3	Sephs1
Aldob	Impdh1	Aldob	Lfng
Dlat	Cyp3a25	Dlat	St6gal1
Aco1	Tk2	Aco1	St3gal3
Aco2	Dpys	Aco2	Pofut2
Cs	Ces5a	Cs	Pomt1
Fh1	Uckl1	Fh1	Mgat5b
Idh1	Ugt2b1	Idh1	Pip4k2a
Idh3g	Ugt2a3	Idh3g	Plcb1
Mdh2	Cda	Mdh2	Plcb4
Mdh1	Ces2g	Mdh1	Synj2
Ogdh	Upp2	Ogdh	Plce1
Pcx	Uck2	Pcx	Impa2
Sucla2	Dpyd	Sucla2	Inpp5a
Suclg2	Ugt2b34	Suclg2	Itpk1
Suclg1	Upb1	Suclg1	Plcg2
Sdhc	Ces1d	Sdhc	Inpp4a
Sdhd	Gusb	Sdhd	Itpkb
Sdha	Gmps	Sdha	Pla2g6
Sdhb	Ugt2b36	Sdhb	Ppap2b
Idh3a	Ces2e	Idh3a	Acyp2
Csl	Cyp3a44	Csl	Aldh1l1
Dlst	Rplp0	Dlst	Mthfd1
Acly	Fau	Acly	Qprt
Idh3b	Rps2	Idh3b	Nmnat2
Idh2	Rpl10a	Idh2	Vnn1
Akr1b3	Rpl18	Akr1b3	Pank2
Akr1b7	Rpl26	Akr1b7	Farsb
Akr1b8	Rpl27	Akr1b8	Fars2
Ugdh	Rpl37a	Ugdh	Alpl
Ugt2b5	Rpl6	Ugt2b5	Cyp2e1
Dcxr	Gm5045 /// Rpl7	Dcxr	Degs1
Cryl1	Rpl9	Cryl1	Ext1
Dhdh	Rps14	Dhdh	Ext2
Ugt2b1	Rps16	Ugt2b1	Fech
Ugt2a3	Rps17	Ugt2a3	Gcnt2
Ugt2b34	Rps18	Ugt2b34	Man1a2
Xylb	Rps19	Xylb	Polg
Gusb	Gm10119 /// Gm9000 /// Rps3a	Gusb	Ptgds
Ugp2	Rps4x	Ugp2	Ptgs1
Ugt2b36	Rps5	Ugt2b36	Aldh1a2
Khk	Rps6	Khk	St6galnac3
Pfkfb1	Rps7	Pfkfb1	Eef1a2
Pfkfb2	Rpl13a	Pfkfb2	Eif1a
Sord	Uba52	Sord	Eif4e
Tsta3	Rpl8	Tsta3	Acin1
Pmm1	Rps3	Pmm1	Eif3h
Mtmr1	Rps11	Mtmr1	Eif4b
Pmm2	Rpl3l	Pmm2	Paip1
Mtmr7	Rpl35	Mtmr7	Eif2b5
Gmppa	Rpl11	Gmppa	Upf2
Phpt1	Rps10	Phpt1	Msi1
Fpgt	Rpl14	Fpgt	Papola
Mtmr2	Rplp2	Mtmr2	Msi2
Akr1c6	LOC100503815 /// LOC100504784 /// Rpl39	Akr1c6	Clp1
Mpi	Rpl38	Mpi	Smg6
Pfkfb3	Rpl4	Pfkfb3	Etf1
Gmds	Rpl22l1	Gmds	Cnot8
Mtmr6	Rpl39l	Mtmr6	Dcp1b
Fuk	Mrpl13	Fuk	Taf6l
Pfkfb4	Rps9	Pfkfb4	Taf4a
9630033F20Rik	Rsl24d1	9630033F20Rik	Srsf4
Gmppb	Rpl17	Gmppb	Ctnnbl1
Gla	Chrna7	Gla	Ccdc12
Glb1	Adcy7	Glb1	Smndc1
Gaa	Adcy8	Gaa	Srsf9
Galt	Adcy9	Galt	Psmb4
B4galt1	Adora2a	B4galt1	Psmd4
Galk1	Adora2b	Galk1	Psma8
Lalba	Adra1b	Lalba	Smug1
B4galt2	Adra1a	B4galt2	Mnat1
Galk2	Adrb1	Galk2	Rad23a
Gale	Adrb2	Gale	Prkdc
Ganc	Adrb3	Ganc	Akt2
Lct	Agtr1a	Lct	Cacna1a
Mgam	Agtr1b	Mgam	Cacna1d
Acadl	Slc25a4	Acadl	Cacna1s
Acadm	Slc25a5	Acadm	Cacna2d3
Acadvl	Atp2a1	Acadvl	Cacnb2
Acads	Atp2a2	Acads	Cacnb4
Acox1	Atp2b2	Acox1	Mecom
Cpt1a	Bdkrb1	Cpt1a	Fgf10
Cpt2	Bdkrb2	Cpt2	Fgf12
Cyp4a14	Bst1	Cyp4a14	Fgf15
Dci	Cacna1a	Dci	Fgf6
Acsl1	Cacna1b	Acsl1	Fgfr1
Hadh	Cacna1c	Hadh	Gna12
Peci	Cacna1d	Peci	Myc
Acsl4	Cacna1e	Acsl4	Nfkb1
Acaa2	Cacna1g	Acaa2	Ntf3
Acadsb	Cacna1s	Acadsb	Pdgfra
Ehhadh	Camk2a	Ehhadh	Prkca
Acsl3	Camk2b	Acsl3	Ppp3ca
Cpt1c	Camk2g	Cpt1c	Dusp1
Acox3	Camk4	Acox3	Ptprr
Echs1	Cckar	Echs1	Traf2
Hadha	Cckbr	Hadha	Gadd45g
Acat1	Cd38	Acat1	Map2k5
Acaa1a	Chrm1	Acaa1a	Map2k6
Acsl6	Chrm3	Acsl6	Map3k11
Hadhb	Drd1a	Hadhb	Map3k3
Acaa1b	Ednra	Acaa1b	Map3k7
Gcdh	Ednrb	Gcdh	Mapk13
Cyp4a12a	Egfr	Cyp4a12a	Cacna2d2
Acsbg2	Erbb2	Acsbg2	Fgf23
Acsl5	Erbb3	Acsl5	B230120H23Rik
Cyp4a31	Erbb4	Cyp4a31	Rras2
Cel	F2r	Cel	Rapgef2
Cyp27b1	Gna11	Cyp27b1	Arrb1
Cyp51	Gna14	Cyp51	Cacng5
Dhcr7	Gna15	Dhcr7	Map4k3
Ebp	Gnal	Ebp	Rasgrp3
Fdft1	Gnaq	Fdft1	Flnb
Hsd17b7	Gnas	Hsd17b7	Dusp4
Lipa	Grin1	Lipa	Cacna2d4
Lss	Grin2a	Lss	Abl1
Nsdhl	Grin2c	Nsdhl	Abl2
Soat1	Grin2d	Soat1	Camk2a
Sqle	Grm1	Sqle	Ptk2
Sc4mol	Grpr	Sc4mol	Nrg3
Tm7sf2	Hrh1	Tm7sf2	Pak3
Dhcr24	Hrh2	Dhcr24	Shc3
Soat2	Htr2b	Soat2	Gsk3b
Sc5d	Htr2c	Sc5d	Camk2d
Cyp2r1	Htr4	Cyp2r1	Ccr5
Pole2	Htr5a	Pole2	Csk
Prim1	Htr5b	Prim1	Gng2
Prim2	Htr6	Prim2	Grk5
Prps1	Htr7	Prps1	Hck
Polr1c	Itpr1	Polr1c	Pxn
Polr1b	Itpr2	Polr1b	Cx3cl1
Polr1d	Itpr3	Polr1d	Cxcl12
Polr1a	Lhcgr	Polr1a	Tiam2
Polr2a	Nos1	Polr2a	Vav3
Polr2c	Nos2	Polr2c	Wasl
Polr2j	Nos3	Polr2j	Pard3
Rrm1	Ntsr1	Rrm1	Elmo1
Rrm2	Oxtr	Rrm2	Prex1
Uox	P2rx1	Uox	Gsk3a
Xdh	P2rx4	Xdh	Itpr1
Impdh1	P2rx7	Impdh1	Cds1
Nt5e	P2rx6	Nt5e	Dgkz
Papss1	Pde1a	Papss1	Dgkg
Papss2	Pde1b	Papss2	Dgki
Pde10a	Pde1c	Pde10a	Dgkh
Dguok	Pdgfra	Dguok	Atm
Pde7b	Pdgfrb	Pde7b	Bub1b
Nt5c	Phka1	Nt5c	Ccnd3
Nudt5	Phkg1	Nudt5	Cdk6
Gucy1b3	Prkaca	Gucy1b3	Smad2
Nme6	Prkacb	Nme6	Rb1
Pde3a	Prkca	Pde3a	Stag1
Nme4	Prkcb	Nme4	Cdc6
Pole3	Prkcc	Pole3	Espl1
Gucy1a3	Plcb1	Gucy1a3	Cdc14b
Polr1e	Plcb2	Polr1e	Igf1r
Znrd1	Plcb3	Znrd1	Bbc3
Gmpr	Plcb4	Gmpr	Birc6
2310004I24Rik	Plcd1	2310004I24Rik	Nedd4
Nudt2	Plcd4	Nudt2	Park2
Polr2e	Plcg1	Polr2e	Rhobtb1
2310079N02Rik	Pln	2310079N02Rik	Herc3
Pole4	Ppp3ca	Pole4	Cul5
Polr3k	Ppp3cb	Polr3k	Wwp1
Paics	Ppp3cc	Paics	Ube2o
Polr3d	Ppp3r1	Polr3d	Fbxw8
Entpd4	Ppp3r2	Entpd4	Ube2u
Polr3g	Prkx	Polr3g	Atg7
Polr2g	Ptafr	Polr2g	Capn2
Pold3	Ptger1	Pold3	Dnajc1
Polr2d	Ptger3	Polr2d	Nfe2l2
Pold4	Ptgfr	Pold4	Dnajc5b
Polr2f	Ptk2b	Polr2f	Sil1
Polr3gl	Ryr1	Polr3gl	Ssr1
Polr2i	Ryr2	Polr2i	Nploc4
Polr3f	Ryr3	Polr3f	Man1c1
Polr3b	Slc8a1	Polr3b	Ap3b1
Nt5c1b	Tacr1	Nt5c1b	Ctsc
Pnpt1	Tacr2	Pnpt1	Ctsh
Entpd8	Tacr3	Entpd8	Igf2r
Nudt9	Tbxa2r	Nudt9	Naga
Polr3c	Tnnc1	Polr3c	Sort1
Prps1l1	Tnnc2	Prps1l1	Naglu
Nme5	Trhr	Nme5	Abcb9
Cant1	Trpc1	Cant1	Gga1
Nt5c2	Vdac1	Nt5c2	Laptm4b
1190003J15Rik	Vdac2	1190003J15Rik	Abcd4
Pde6h	Vdac3	Pde6h	Pex26
Ak7	Avpr1b	Ak7	Nudt19
Polr3h	Atp2a3	Polr3h	Tpm3
Allc	Avpr1a	Allc	Nfatc1
Nt5m	Cacna1f	Nt5m	H2-Ab1
Adcy4	Sphk2	Adcy4	Cyld
Adcy3	Ltb4r2	Adcy3	Adar
Gmpr2	Cacna1h	Gmpr2	Cd247
Nt5c3	Cysltr1	Nt5c3	Fyn
Atic	Atp2b1	Atic	Prkcq
Ampd2	Phkg2	Ampd2	Il3
Prps2	Cysltr2	Prps2	Prkce
Pde6c	2010110P09Rik	Pde6c	Asap1
Nme7	Calml3	Nme7	Vasp
Pde2a	Plcd3	Pde2a	Wasf3
Enpp3	Slc25a31	Enpp3	Fbxl3
Adcy2	Plce1	Adcy2	Bhlhe41
Entpd3	Calm4	Entpd3	Irs1
Pde8b	P2rx5	Pde8b	Ntrk3
Polr3a	Phkb	Polr3a	Irak3
Adcy5	Adcy4	Adcy5	Gnaq
Pde6a	Adcy3	Pde6a	Hrh2
Gmps	Mylk	Gmps	Kcnj16
Prune	Camk2d	Prune	Aqp8
Ampd1	Grm5	Ampd1	Abcb1a
Ak5	Phka2	Ak5	Bcl2l1
Npr2	Slc8a2	Npr2	Grin2c
Ppat	Slc8a3	Ppat	Prph2
Polr2b	Plcz1	Polr2b	Slc1a2
6330407I18Rik	Adcy2	6330407I18Rik	Grm1
Pfas	Mylk3	Pfas	Vdac1
Pde4d	P2rx3	Pde4d	Ndufa9
Pde11a	Itpka	Pde11a	Ap2b1
Pde5a	Mylk2	Pde5a	Grm5
Adcy10	P2rx2	Adcy10	Rcor1
Rrm2b	Plcg2	Rrm2b	Dnahc2
Adcy1	Itpkb	Adcy1	Cav1
Comt1	Atp2b3	Comt1	Cdh1
Cyp11a1	Atp2b4	Cyp11a1	Itga5
Cyp11b2	Adcy1	Cyp11b2	Met
Cyp17a1	Acvr1	Cyp17a1	Vcl
Cyp19a1	Acvr2a	Cyp19a1	Rhog
Cyp1a1	Acvr2b	Cyp1a1	Arhgap10
Cyp1b1	Amh	Cyp1b1	Dock1
Cyp21a1	Cxcr5	Cyp21a1	Cldn4
Cyp3a11	Bmp2	Cyp3a11	Tyk2
Cyp3a13	Bmp7	Cyp3a13	Cldn10
Cyp3a16	Bmpr1a	Cyp3a16	Lef1
Cyp7a1	Bmpr1b	Cyp7a1	Tcf7l1
Cyp7b1	Bmpr2	Cyp7b1	Tcf7l2
H2-Ke6	Ccr6	H2-Ke6	Runx1
Hsd11b1	Cxcr2	Hsd11b1	Sptlc2
Hsd11b2	Cxcr3	Hsd11b2	Tbxas1
Hsd17b1	Cxcr4	Hsd17b1	Btd
Hsd17b2	Ccr1	Hsd17b2	Agpat3
Hsd17b3	Ccr9	Hsd17b3	Extl3
Hsd3b1	Ccr1l1	Hsd3b1	Bcmo1
Hsd3b2	Ccr3	Hsd3b2	Mboat2
Hsd3b5	Ccr2	Hsd3b5	Pigc
Sult1e1	Ccr4	Sult1e1	Coq2
Sts	Ccr5	Sts	Bdh1
Hsd17b6	Ccr7	Hsd17b6	Cyp4f15
Sult2b1	Ccr8	Sult2b1	Galnt7
Hsd17b12	Ccr10	Hsd17b12	Sgms1
Cyp3a25	Cxcr7	Cyp3a25	Gpat2
Srd5a3	Cntfr	Srd5a3	A4galt
Srd5a1	Csf1	Srd5a1	Pon2
Srd5a2	Csf2	Srd5a2	Rps10
Akr1c18	Csf2ra	Akr1c18	Adra1b
Cyp11b1	Csf2rb	Cyp11b1	Atp2b2
Akr1d1	Csf3	Akr1d1	Gna14
Cyp3a44	Ctf1	Cyp3a44	Ntsr1
Ada	Cx3cr1	Ada	Tacr2
Adcy6	Eda	Adcy6	Tacr3
Adcy7	Egf	Adcy7	Tbxa2r
Adcy8	Epor	Adcy8	Atp2b1
Adcy9	Fas	Adcy9	Flt1
Adk	Fasl	Adk	Tnfrsf19
Adsl	Figf	Adsl	Kcnma1
Adssl1	Flt1	Adssl1	Myh11
Adss	Flt3	Adss	Dll1
Ak1	Flt4	Ak1	Dll3
Ak2	Gdf5	Ak2	Notch1
Ak4	Ghr	Ak4	Notch2
Ampd3	Cxcl1	Ampd3	Kat2b
Aprt	Hgf	Aprt	Dtx3
Entpd1	Cxcl10	Entpd1	Gli3
Entpd2	Ifna1	Entpd2	Wnt3
Entpd6	Ifna2	Entpd6	Zic2
Entpd5	Ifna4	Entpd5	Sufu
Dck	Ifna5	Dck	Csnk1g2
Fhit	Ifna9	Fhit	Cdh2
Gart	Ifnab	Gart	Vcan
Gda	Ifnar1	Gda	Ncam1
Gucy2c	Ifnar2	Gucy2c	Nrxn1
Gucy2e	Ifnb1	Gucy2e	Nrxn2
Guk1	Ifng	Guk1	Nrxn3
Hprt	Ifngr1	Hprt	Spn
Itpa	Ifngr2	Itpa	Cntn2
Nme1	Il10	Nme1	Vcam1
Nme2	Il10ra	Nme2	Cntnap1
Npr1	Il11	Npr1	Cadm1
Pde1a	Il12a	Pde1a	Pvrl3
Pde1b	Il12b	Pde1b	Cntnap2
Pde1c	Il12rb1	Pde1c	Jam3
Pde3b	Il12rb2	Pde3b	Itga8
Pde4a	Il13	Pde4a	Nfasc
Pde4b	Il13ra1	Pde4b	Cd59a
Pde6d	Il15	Pde6d	Cr2
Pde7a	Il17a	Pde7a	Slc27a4
Pde8a	Il17ra	Pde8a	Lrp1
Pde9a	Il18	Pde9a	Thbs2
Pde6b	Il18rap	Pde6b	Itgb5
Pde6g	Il1a	Pde6g	Itgb6
Enpp1	Il1b	Enpp1	Sgcb
Pnp	Il1r1	Pnp	Actn1
Pola1	Il1r2	Pola1
Pola2	Il1rap	Pola2
Pold1	Il18r1	Pold1
Pold2	Il2	Pold2
Pole	Il2ra	Pole
Tk1	Il2rb	Tk1
Dtymk	Il2rg	Dtymk
Cmpk2	Il3	Cmpk2
Tyms	Il3ra	Tyms
Uck1	Il4	Uck1
Umps	Il4ra	Umps
Upp1	Il5	Upp1
Txnrd2	Il5ra	Txnrd2
Txnrd1	Il6	Txnrd1
Ctps	Il6ra	Ctps
Ctps2	Il6st	Ctps2
Ak3	Il7	Ak3
Dhodh	Il9	Dhodh
Tk2	Inhba	Tk2
Dpys	Inhbb	Dpys
Cmpk1	Inhbc	Cmpk1
Uckl1	Inhbe	Uckl1
Cad	Kdr	Cad
Cda	Kit	Cda
Upp2	Lep	Upp2
Uck2	Lif	Uck2
Dpyd	Xcl1	Dpyd
Upb1	Lta	Upb1
Dut	Ltbr	Dut
Txnrd3	Met	Txnrd3
Dctd	Kitl	Dctd
Aspa	Cxcl9	Aspa
Agxt	Mpl	Agxt
Ass1	Ngfr	Ass1
Gad1	Tnfrsf11b	Gad1
Gad2	Osm	Gad2
Gfpt1	Pdgfa	Gfpt1
Gfpt2	Pdgfb	Gfpt2
Glul	Prl	Glul
Gls	Ccl1	Gls
Glud1	Ccl11	Glud1
Got1	Ccl17	Got1
Got2	Ccl20	Got2
Asns	Ccl22	Asns
Nit2	Ccl25	Nit2
Ddo	Ccl27a /// Ccl27b	Ddo
Acy3	Ccl3	Acy3
Gpt	Ccl4	Gpt
Lao1	Ccl5	Lao1
Gpt2	Ccl6	Gpt2
Asl	Ccl7	Asl
Aldh4a1	Ccl9	Aldh4a1
Aldh5a1	Cxcl15	Aldh5a1
Gls2	Cxcl2	Gls2
Cps1	Cxcl5	Cps1
Agxt2	Cx3cl1	Agxt2
Abat	Cxcl12	Abat
Alas1	Tgfb1	Alas1
Alas2	Tgfb2	Alas2
Aoc3	Tgfb3	Aoc3
Bhmt	Tgfbr1	Bhmt
Cbs	Tgfbr2	Cbs
Dao	Tnf	Dao
Gamt	Tnfrsf10b	Gamt
Gnmt	Tnfrsf11a	Gnmt
Maoa	Tnfrsf17	Maoa
Pipox	Tnfrsf18	Pipox
Shmt1	Tnfrsf1a	Shmt1
Srr	Tnfrsf1b	Srr
Tdh	Cd40	Tdh
Gatm	Cd27	Gatm
Tha1	Tnfrsf8	Tha1
Dmgdh	Tnfrsf9	Dmgdh
Psph	Tnfsf11	Psph
Gldc	Cd40lg	Gldc
Cth	Cd70	Cth
Shmt2	Tnfsf8	Shmt2
Maob	Tnfsf9	Maob
Sardh	Tpo	Sardh
Chdh	Tnfsf10	Chdh
Sds	Tnfrsf4	Sds
Glyctk	Tnfsf4	Glyctk
Phgdh	Vegfa	Phgdh
Amd1	Vegfb	Amd1
Mat1a	Vegfc	Mat1a
Cdo1	Xcr1	Cdo1
Dnmt1	Tnfsf13b	Dnmt1
Trdmt1	Tnfrsf12a	Trdmt1
Dnmt3a	Tnfrsf19	Dnmt3a
Dnmt3b	Il17rb	Dnmt3b
	Tnfsf14	Srm
Srm	Tslp	Tst
Tst	Pdgfc	Dnmt3l
Dnmt3l	Cxcl13	Apip
Apip	Cxcl11	Mtap
Mtap	Il17b	Enoph1
Enoph1	Ccl24	Mri1
Mri1	Clcf1	Ahcyl2
Ahcyl2	Pf4	Adi1
Adi1	Ccl28	Mat2b
Mat2b	Cxcl14	Ahcyl1
Ahcyl1	Ppbp	Mat2a
Mat2a	Crlf2	Tat
Tat	Tnfrsf13b	Mtr
Mtr	Il20	Mpst
Mpst	Il21r	Ahcy
Ahcy	Cxcl16	Aox1
Aox1	Pdgfd	Auh
Auh	Tnfrsf13c	Bcat1
Bcat1	Cxcr6	Bcat2
Bcat2	Il23a	Bckdha
Bckdha	Tnfrsf25	Bckdhb
Bckdhb	Il24	Dbt
Dbt	Tnfrsf21	Hsd17b10
Hsd17b10	Il25	Hmgcl
Hmgcl	9130219A07Rik	Hmgcs2
Hmgcs2	Tnfrsf14	Mut
Mut	Il22ra2	Ivd
Ivd	Il28ra	Hibadh
Hibadh	Relt	Oxct2a
Oxct2a	Actg2	Pccb
Pccb	Acta2	Acad8
Acad8	Adcy6	Oxct1
Oxct1	Araf	Mccc1
Mccc1	Rhoa	Mcee
Mcee	Cyp4a14	Mccc2
Mccc2	Gna12	Aldh6a1
Aldh6a1	Gna13	Pcca
Pcca	Kcnma1	Hmgcs1
Hmgcs1	Kcnu1	Hibch
Hibch	Kcnmb1	Copg
Copg	Arhgef1	Atp6v0d1
Atp6v0d1	Mrvi1	Golga7
Golga7	Myh11	Trappc4
Trappc4	Myl6	Dpm2
Dpm2	Ppp1r12a	Psmb5
Psmb5	Npr1	Dhrs1
Dhrs1	Prkcd	Ppm1a
Ppm1a	Prkce	Psenen
Psenen	Prkch	Anapc1
Anapc1	Prkcq	Mrpl43
Mrpl43	Pla2g1b	Nsd1
Nsd1	Pla2g2a	Plod1
Plod1	Pla2g2c	Suv39h1
Suv39h1	Pla2g2d	Aadat
Aadat	Pla2g4a	Plod2
Plod2	Pla2g5	Plod3
Plod3	Ppp1ca	Aass
Aass	Ppp1cb	Suv39h2
Suv39h2	Ppp1cc	Setd8
Setd8	LOC100503436 /// Prkg1	Setd7
Setd7	Ptgir	Setmar
Setmar	Rock1	Ehmt1
Ehmt1	Rock2	Setdb1
Setdb1	Map2k1	Whsc1
Whsc1	Map2k2	Ehmt2
Ehmt2	Mapk1	Bbox1
Bbox1	Mapk3	Ash1l
Ash1l	Pla2g10	Tmlhe
Tmlhe	Pla2g2e	Setd1b
Setd1b	Pla2g2f	Dot1l
Dot1l	Ramp1	Suv420h1
Suv420h1	Pla2g6	Suv420h2
Suv420h2	Gucy1b3	Setd1a
Setd1a	Ramp2	Whsc1l1
Whsc1l1	Calcrl	Glt25d1
Glt25d1	Ramp3	Setd2
Setd2	Kcnmb4	Setdb2
Setdb2	Gucy1a3	Glt25d2
Glt25d2	Pla2g12a	Arg1
Arg1	Ppp1r14a	Arg2
Arg2	Pla2g12b	Ckb
Ckb	Kcnmb2	Ckm
Ckm	Pla2g4d	Ckmt1
Ckmt1	Myl9	Nos1
Nos1	Cald1	Nos2
Nos2	Braf	Nos3
Nos3	Raf1	Oat
Oat	Adcy5	Odc1
Odc1	Npr2	Otc
Otc	6330407I18Rik	P4ha1
P4ha1	Pla2g3	P4ha2
P4ha2	Cyp4a12a	Prodh
Prodh	Ppp1r12b	Sat1
Sat1	Pla2g4e	Prodh2
Prodh2	Cyp4a31	Aldh18a1
Aldh18a1	Adam17	Pycrl
Pycrl	Crebbp	Lap3
Lap3	Ctbp1	Pycr2
Pycr2	Ctbp2	Sat2
Sat2	Dll1	Agmat
Agmat	Dll3	Abp1
Abp1	Dvl1	Ckmt2
Ckmt2	Dvl2	Acy1
Acy1	Dvl3	Pycr1
Pycr1	Dtx1	Nags
Nags	Kat2a	Adc
Adc	Hdac2	P4ha3
P4ha3	Hes1	Lcmt2
Lcmt2	Hes5	Ddc
Ddc	Jag1	Ftcd
Ftcd	Jag2	Hal
Hal	Lfng	Hdc
Hdc	Mfng	Mettl2
Mettl2	Notch1	Wbscr22
Wbscr22	Notch2	Mettl6
Mettl6	Notch3	Hemk1
Hemk1	Notch4	Amdhd1
Amdhd1	Numb	Hnmt
Hnmt	Kat2b	Uroc1
Uroc1	Psen1	Cndp1
Cndp1	Psen2	Dbh
Dbh	Ptcra	Dct
Dct	Rbpj	Fah
Fah	Rfng	Gstz1
Gstz1	Ncor2	Hgd
Hgd	Dll4	Hpd
Hpd	Ncstn	Mif
Mif	Psenen	Pnmt
Pnmt	Snw1	Th
Th	Cir1	Tpo
Tpo	Dtx2	Tyr
Tyr	Dtx3	Tyrp1
Tyrp1	Maml1	Prdx6
Prdx6	Dtx4	Pah
Pah	Aph1b	Aanat
Aanat	Aph1a	Cat
Cat	Hdac1	Cyp1a2
Cyp1a2	Bmp4	Ido1
Ido1	Bmp5	Inmt
Inmt	Bmp6	Tph1
Tph1	Bmp8a	Wars
Wars	Bmp8b	Tdo2
Tdo2	Btrc	Ccbl1
Ccbl1	Dhh	Wars2
Wars2	Gas1	Kynu
Kynu	Gli1	Afmid
Afmid	Gli2	Kmo
Kmo	Gli3	Haao
Haao	Lrp2	Ido2
Ido2	Hhip	Tph2
Tph2	Ihh	Ccbl2
Ccbl2	Ptch1	Sephs2
Sephs2	Ptch2	Scly
Scly	Rab23	Sephs1
Sephs1	Shh	Sepsecs
Sepsecs	Wnt8a	Mars2
Mars2	Wnt1	Pstk
Pstk	Wnt9b	Mars
Mars	Wnt2	Fut4
Fut4	Wnt3	Fut7
Fut7	Wnt4	Fut9
Fut9	Wnt5a	Lfng
Lfng	Wnt5b	Mfng
Mfng	Wnt6	Rfng
Rfng	Wnt7a	St6gal1
St6gal1	Wnt7b	St3gal3
St3gal3	Wnt8b	B4galt3
B4galt3	Zic2	Pomgnt1
Pomgnt1	Sufu	Pofut2
Pofut2	Csnk1e	Chst10
Chst10	Gsk3b	Pomt1
Pomt1	Csnk1g3	Ogt
Ogt	Csnk1a1	Pofut1
Pofut1	Csnk1g2	Pomt2
Pomt2	Fbxw11	Gxylt1
Gxylt1	Csnk1d	Poglut1
Poglut1	Csnk1g1	Gxylt2
Gxylt2	Wnt9a	St6gal2
St6gal2	Stk36	Mgat5b
Mgat5b	Smo	B3galtl
B3galtl	Alcam	Inpp1
Inpp1	Ctla4	Inpp5b
Inpp5b	Cd22	Inppl1
Inppl1	Cd28	Minpp1
Minpp1	Cd34	Pik3c2a
Pik3c2a	Cd4	Pik3c2g
Pik3c2g	Cd6	Pik3ca
Pik3ca	Cd80	Pik3cd
Pik3cd	Cd86	Pikfyve
Pikfyve	Cd8a	Pip5k1c
Pip5k1c	Cd8b1	Pip4k2a
Pip4k2a	Cdh1	Pip5k1b
Pip5k1b	Cdh15	Pip5k1a
Pip5k1a	Cdh2	Plcb1
Plcb1	Cdh3	Plcb2
Plcb2	Cdh4	Plcb3
Plcb3	Cdh5	Plcb4
Plcb4	Cldn1	Plcd1
Plcd1	Cldn2	Plcd4
Plcd4	Cldn3	Plcg1
Plcg1	Cldn4	Inpp5k
Inpp5k	Cldn5	Pten
Pten	Cntn1	Synj2
Synj2	Vcan	Pik3cg
Pik3cg	Glycam1	Cdipt
Cdipt	H2-Aa	Impa1
Impa1	H2-Ab1	Miox
Miox	H2-Bl	Inpp5e
Inpp5e	H2-D1	Pi4k2b
Pi4k2b	H2-Eb1	Ipmk
Ipmk	H2-K1	Isyna1
Isyna1	H2-M10.1	Plcd3
Plcd3	H2-M3	Plce1
Plce1	H2-M9	Pik3cb
Pik3cb	H2-DMa	Ippk
Ippk	H2-DMb2	Pi4k2a
Pi4k2a	H2-Oa	Synj1
Synj1	H2-Ob	Pi4kb
Pi4kb	H2-Q10	Pip4k2b
Pip4k2b	H2-T24	Impa2
Impa2	Sdc2	Plcz1
Plcz1	Icam1	Pip4k2c
Pip4k2c	Icam2	Inpp5j
Inpp5j	Itga4	Inpp5a
Inpp5a	Itga6	Itpk1
Itpk1	Itgal	Pi4ka
Pi4ka	Itgam	Pik3c3
Pik3c3	Itgav	Pip5kl1
Pip5kl1	Itgb1	Itpka
Itpka	Itgb2	Inpp4b
Inpp4b	Itgb7	Plcg2
Plcg2	F11r	Inpp4a
Inpp4a	L1cam	Itpkb
Itpkb	Madcam1	Ocrl
Ocrl	Mag	Pafah1b1
Pafah1b1	Mpz	Pafah1b2
Pafah1b2	Ncam1	Pafah1b3
Pafah1b3	Ncam2	Enpp2
Enpp2	Neo1	Pla2g1b
Pla2g1b	Nrxn1	Pla2g2a
Pla2g2a	Nrxn2	Pla2g2c
Pla2g2c	Nrxn3	Pla2g2d
Pla2g2d	Ocln	Pla2g4a
Pla2g4a	Cldn11	Pla2g5
Pla2g5	Pdcd1	Pld1
Pld1	Pecam1	Pld2
Pld2	Ptprc	Ppap2a
Ppap2a	Ptprf	Pla2g10
Pla2g10	Ptprm	Pla2g2e
Pla2g2e	Pvrl2	Pla2g2f
Pla2g2f	Sele	Pla2g7
Pla2g7	Glg1	Ept1
Ept1	Sell	Ppap2c
Ppap2c	Selp	Pla2g6
Pla2g6	Siglec1	Pla2g12a
Pla2g12a	Spn	Ppap2b
Ppap2b	Sdc1	Pla2g12b
Pla2g12b	Sdc3	Pla2g4d
Pla2g4d	Sdc4	Lpcat4
Lpcat4	Cntn2	Cept1
Cept1	Vcam1	Pafah2
Pafah2	Icosl	Lpcat1
Lpcat1	Cntnap1	Chpt1
Chpt1	Cldn7	Agps
Agps	Icos	Pla2g3
Pla2g3	Cldn6	Lpcat2
Lpcat2	Cldn8	Enpp6
Enpp6	Cadm1	Pla2g4e
Pla2g4e	Cldn14	Plb1
Plb1	Cldn18	Hagh
Hagh	Cldn9	Me1
Me1	Cldn13	Ldhd
Ldhd	Cldn10	Acyp1
Acyp1	Pdcd1lg2	Haghl
Haghl	Pvrl1	Acot12
Acot12	Pvrl3	Acyp2
Acyp2	Cldn15	Grhpr
Grhpr	Cntnap2	Acacb
Acacb	Jam2	LOC100505264 /// Me2
LOC100505264 /// Me2	Esam	Me3
Me3	Cldn23	Glo1
Glo1	4930412D23Rik	Mlycd
Mlycd	4930468A15Rik	Dhfr
Dhfr	Cldn22	Mthfd2
Mthfd2	Jam3	Mthfr
Mthfr	Cadm3	Mtfmt
Mtfmt	Itga9	Aldh1l1
Aldh1l1	Cldn16	Mthfs
Mthfs	Nlgn1	Mthfd1
Mthfd1	Nlgn2	Aldh1l2
Aldh1l2	Itga8	Mthfd1l
Mthfd1l	Cldn19	Mthfd2l
Mthfd2l	Nlgn3	Bst1
Bst1	Nfasc	Cd38
Cd38	Nrcam	Nnmt
Nnmt	Negr1	Nnt
Nnt	Itgb8	Nampt
Nampt	Cd99	Nmnat1
Nmnat1	Cfd	Qprt
Qprt	Serpinc1	Nudt12
Nudt12	Serping1	Nmnat3
Nmnat3	C1qa	Nadsyn1
Nadsyn1	C1qb	Nadk
Nadk	C1qc	BC016495
BC016495	C2	Nmnat2
Nmnat2	C3ar1	Vnn1
Vnn1	C4bp	Ppcdc
Ppcdc	C5ar1	Coasy
Coasy	C6	Pank2
Pank2	C9	Pank1
Pank1	Cd59a	Ppcs
Ppcs	Cfh	Pank3
Pank3	Cfi	Pank4
Pank4	Cr2	Hars
Hars	Cr1l	Sars
Sars	Cd55	Vars
Vars	Daf2	Farsb
Farsb	F10	Cars
Cars	F13b	Farsa
Farsa	F3	Ears2
Ears2	F5	Vars2
Vars2	F7	Fars2
Fars2	F8	Yars2
Yars2	F9	Nars
Nars	Fga	Hars2
Hars2	Hc	Tars2
Tars2	Serpind1	Cars2
Cars2	Klkb1	Sars2
Sars2	Kng1	Qars
Qars	Masp1	Lars2
Lars2	Masp2	Rars
Rars	Mbl1	Iars
Iars	Mbl2	Lars
Lars	Cd46	Yars
Yars	Serpine1	Eprs
Eprs	Plat	Rars2
Rars2	Plau	Tars
Tars	Plg	Aars2
Aars2	Serpinf2	Dars
Dars	Proc	Dars2
Dars2	Pros1	Pet112l
Pet112l	Serpina1a	Pars2
Pars2	Serpina1b	Aars
Aars	Serpina1c	Nars2
Nars2	Tfpi	Tarsl2
Tarsl2	Thbd	Gars
Gars	Vwf	Iars2
Iars2	C1s	Slc33a1
Slc33a1	C1ra	Alpl
Alpl	Cpb2	Akp3
Akp3	F12	Alppl2
Alppl2	C8g	Alox12
Alox12	F13a1	Alox12e
Alox12e	Fgg	Alox12b
Alox12b	Fgb	Alox15
Alox15	C8b	Alox8
Alox8	C8a	Alox5
Alox5	A2m	Amy1
Amy1	Serpina5	Arsb
Arsb	Ctnnb1	Asah1
Asah1	Creb1	Atp5a1
Atp5a1	Creb3	Atp5b
Atp5b	Dct	Atp5c1
Atp5c1	Edn1	Atp5f1
Atp5f1	Fzd1	Atp5g1
Atp5g1	Fzd3	Atp5j
Atp5j	Fzd4	Atp5k
Atp5k	Fzd5	Atp6v1a
Atp6v1a	Fzd6	Atp6v1b2
Atp6v1b2	Fzd7	Atp6v1e1
Atp6v1e1	Fzd8	Atp6v0e
Atp6v0e	Fzd9	Atp6v0a1
Atp6v0a1	Gnai1	Atp6v0c
Atp6v0c	Gnai2	Baat
Baat	Gnai3	Cbr1
Cbr1	Gnao1	Cbr2
Cbr2	Hras1	Chkb
Chkb	Kras	Chka
Chka	Lef1	Cmas
Cmas	Mc1r	Coq7
Coq7	Mitf	Cox17
Cox17	Nras	Cox4i1
Cox4i1	Pomc	Cox5a
Cox5a	Tcf7	Cox5b
Cox5b	Tcf7l1	Cox6a1
Cox6a1	Tcf7l2	Cox6a2
Cox6a2	Tyr	Cox8b
Cox8b	Tyrp1	Cpox
Cpox	Creb3l1	Pcyt1a
Pcyt1a	Fzd2	Cyp2a12
Cyp2a12	Creb3l4	Cyp2b10
Cyp2b10	Creb3l2	Cyp2b13
Cyp2b13	Creb3l3	Cyp2b19
Cyp2b19	Abca1	Cyp2b9
Cyp2b9	Apoa1	Cyp2c29
Cyp2c29	Apoa4	Cyp2c37
Cyp2c37	Cd36	Cyp2c38
Cyp2c38	Cel	Cyp2c39
Cyp2c39	Dgat1	Cyp2e1
Cyp2e1	Fabp2	Cyp2j5
Cyp2j5	Fabp1	Cyp2j6
Cyp2j6	Got2	Cyp8b1
Cyp8b1	Mttp	Dad1
Dad1	Pnliprp1	Dgka
Dgka	Pnliprp2	Ddost
Ddost	Ppap2a	Degs1
Degs1	Scarb1	Dgat1
Dgat1	Slc27a4	Dpagt1
Dpagt1	Abcg5	Dpm1
Dpm1	Ppap2c	Ephx2
Ephx2	Agpat1	Ces1e
Ces1e	Abcg8	Ext1
Ext1	Agpat2	Ext2
Ext2	Lipf	Fasn
Fasn	Dgat2	Fech
Fech	Ppap2b	Fpgs
Fpgs	Pnlip	Fut1
Fut1	Clps	Fut2
Fut2	Mogat2	Ganab
Ganab	Npc1l1	G6pd2
G6pd2	Apob	G6pdx
G6pdx	Bax	Galc
Galc	Casp12	B4galnt1
B4galnt1	Egr1	Galnt1
Galnt1	Elk1	Galnt3
Galnt3	Fyn	Galnt4
Galnt4	Hspa5	Gba
Gba	Prnp	Gch1
Gch1	Sod1	Gcnt1
Gcnt1	Stip1	Gcnt2
Gcnt2	Hspa1a	Ggps1
Ggps1	Lamc1	Ggt1
Ggt1	Hbb-b2	Gk2
Gk2	Ido1	Gclc
Gclc	Lama4	Gclm
Gclm	Myd88	Gpaa1
Gpaa1	Thop1	Gpam
Gpam	Tlr9	Pigq
Pigq	Ido2	Gss
Gss	Cd81	Gyk
Gyk	Comp	Hao1
Hao1	Darc	Hexa
Hexa	Gypa	Hexb
Hexb	Lrp1	Gm6453 /// Hmbs
Gm6453 /// Hmbs	Thbs1	Hmgcr
Hmgcr	Thbs2	Hpse
Hpse	Thbs3	Lipc
Lipc	Thbs4	Hsd17b4
Hsd17b4	Tlr4	Ndst1
Ndst1	Tlr2	Hyal2
Hyal2	Gypc	Ids
Ids	Actb	Idua
Idua	Actg1	Stt3a
Stt3a	Actn2	Anpep
Anpep	Actn3	Lipg
Lipg	Cacna2d1	Lta4h
Lta4h	Cacna2d3	Ltc4s
Ltc4s	Cacnb1	Alad
Alad	Cacnb2	Amacr
Amacr	Cacnb3	Man1a
Man1a	Cacnb4	Man1a2
Man1a2	Cacng1	Man2a1
Man2a1	Cacng2	Rdh11
Rdh11	Ctnna1	Mgat1
Mgat1	Ctnna2	Mgat3
Mgat3	Dag1	Ndst2
Ndst2	Des	Gm4076 /// ND5
Gm4076 /// ND5	Dmd	Mvk
Mvk	Dsc2	Nat1
Nat1	Dsg2	Nat2
Nat2	Emd	Nat3
Nat3	Gja1	Ndufa2
Ndufa2	Itga2	Ndufa4
Ndufa4	Itga3	Ndufs4
Ndufs4	Itga5	Ndufv1
Ndufv1	Itga7	Pemt
Pemt	Itgb3	Piga
Piga	Itgb5	Pigf
Pigf	Itgb6	Pnliprp1
Pnliprp1	Jup	Pnliprp2
Pnliprp2	Lama2	Polg
Polg	Lmna	Pon1
Pon1	Sgca	Ppox
Ppox	Sgcb	Ppt1
Ppt1	Sgcd	Ptdss1
Ptdss1	Sgcg	Ptgds
Ptgds	Cacng3	Ptgis
Ptgis	Cacng4	Ptgs1
Ptgs1	Cacng6	Ptgs2
Ptgs2	Cacna2d2	Pts
Pts	Actn4	Aldh1a2
Aldh1a2	Pkp2	Rdh16
Rdh16	Cacng7	Rev3l
Rev3l	Cacng8	Rpia
Rpia	Dsp	Rpn2
Rpn2	Itga1	Dhrs3
Dhrs3	Actn1	Acsm3
Acsm3	Cacng5	Scp2
Scp2	Itgb4	Sgpl1
Sgpl1	Ctnna3	St3gal1
St3gal1	Cacna2d4	St3gal4
St3gal4		St3gal2
St3gal2		St6galnac1
St6galnac1		St6galnac3
St6galnac3		St6galnac4
St6galnac4		St8sia1
St8sia1		St3gal5
St3gal5		Smpd1
Smpd1		Smpd2
Smpd2		Spam1
Spam1		Csnk2a1
Csnk2a1		Csnk2a2
Csnk2a2		Csnk2b
Csnk2b		Emg1
Emg1		Eif6
Eif6		Rasl2-9-ps
Rasl2-9-ps		Tcof1
Tcof1		Cirh1a
Cirh1a		Xrn1
Xrn1		Xrn2
Xrn2		Imp4
Imp4		Gnl3
Gnl3		Nhp2
Nhp2		Nxf1
Nxf1		Rpp30
Rpp30		Nop58
Nop58		Nxt1
Nxt1		Spata5
Spata5		Rcl1
Rcl1		Pop4
Pop4		Nop10
Nop10		Sbds
Sbds		Rexo1
Rexo1		Nop56
Nop56		Nvl
Nvl		Nob1
Nob1		Pop1
Pop1		Mphosph10
Mphosph10		Gar1
Gar1		Rbm28
Rbm28		Gtpbp4
Gtpbp4		2810432D09Rik
2810432D09Rik		Riok1
Riok1		Wdr43
Wdr43		Utp14a
Utp14a		Wdr75
Wdr75		Pop7
Pop7		Rrp7a
Rrp7a		1700009N14Rik
1700009N14Rik		Nxf2
Nxf2		Nmd3
Nmd3		Rexo2
Rexo2		Utp15
Utp15		Taf9
Taf9		Pwp2
Pwp2		Pop5
Pop5		Nxf7
Nxf7		Utp14b
Utp14b		Rpp40
Rpp40		Tbl3
Tbl3		Bms1
Bms1		Utp6
Utp6		Utp18
Utp18		Heatr1
Heatr1		Lsg1
Lsg1		Wdr36
Wdr36		Nol6
Nol6		LOC100505087
LOC100505087		Nxt2
Nxt2		Gnl3l
Gnl3l		Dkc1
Dkc1		Nxf3
Nxf3		Wdr3
Wdr3		Clns1a
Clns1a		Eef1a1
Eef1a1		Eef1a2
Eef1a2		Eif1a
Eif1a		Eif2s1
Eif2s1		Eif2b4
Eif2b4		Eif3a
Eif3a		Eif4a1
Eif4a1		Eif4a2
Eif4a2		Eif4e
Eif4e		Eif4ebp1
Eif4ebp1		Eif4g2
Eif4g2		Kpnb1
Kpnb1		Eif3e
Eif3e		Magoh
Magoh		Nup50
Nup50		Nup62
Nup62		Pabpc1
Pabpc1		Pabpc2
Pabpc2		Pnn
Pnn		Nup88
Nup88		Ranbp2
Ranbp2		Rangap1
Rangap1		Upf1
Upf1		Rnps1
Rnps1		Smn1
Smn1		Sumo3
Sumo3		Strap
Strap		Tacc3
Tacc3		Thoc4
Thoc4		Ube2i
Ube2i		Sumo1
Sumo1		Eif2s3x
Eif2s3x		Eif2s3y
Eif2s3y		Eif4e2
Eif4e2		Prmt5
Prmt5		Eif3b
Eif3b		Srrm1
Srrm1		Eif3g
Eif3g		Bat1a
Bat1a		Ddx20
Ddx20		Nup210
Nup210		Eif3i
Eif3i		Eif3d
Eif3d		Acin1
Acin1		Eif3c
Eif3c		Phax
Phax		Nup160
Nup160		Rbm8a
Rbm8a		Snupn
Snupn		Eif3f
Eif3f		Eif1ax
Eif1ax		Magohb
Magohb		Sip1
Sip1		Rae1
Rae1		Upf3a
Upf3a		Rpp14
Rpp14		Eif2s2
Eif2s2		Pabpc6
Pabpc6		Rpp21
Rpp21		Ncbp2
Ncbp2		Upf3b
Upf3b		Eif3h
Eif3h		Elac2
Elac2		Eif1b
Eif1b		Nup35
Nup35		Gemin7
Gemin7		Nup43
Nup43		Trnt1
Trnt1		Nup205
Nup205		4933411G06Rik
4933411G06Rik		Nup93
Nup93		Nupl1
Nupl1		Seh1l
Seh1l		Xpo5
Xpo5		Tmem48
Tmem48		Xpot
Xpot		Thoc3
Thoc3		Eif4b
Eif4b		Senp2
Senp2		Nup210l
Nup210l		Wibg
Wibg		Pabpc5
Pabpc5		Rpp25
Rpp25		Nup107
Nup107		Xpo1
Xpo1		Thoc5
Thoc5		Pom121
Pom121		Eif2b3
Eif2b3		Tpr
Tpr		Sec13
Sec13		Elac1
Elac1		Tgs1
Tgs1		Nup155
Nup155		Sumo2
Sumo2		Casc3
Casc3		Eif4a3
Eif4a3		Pom121l2
Pom121l2		Eif4g1
Eif4g1		Eif2b1
Eif2b1		Gemin5
Gemin5		Eif2b2
Eif2b2		Eif5
Eif5		Nup153
Nup153		Paip1
Paip1		Aaas
Aaas		Eif2b5
Eif2b5		Thoc1
Thoc1		Eif5b
Eif5b		Nup188
Nup188		Nup214
Nup214		Pabpc4
Pabpc4		Eif4g3
Eif4g3		Nupl2
Nupl2		AF366264
AF366264		Nup133
Nup133		Gemin8
Gemin8		Pabpc4l
Pabpc4l		Nup54
Nup54		Nup98
Nup98		Upf2
Upf2		Thoc2
Thoc2		Pabpc1l
Pabpc1l		Thoc6
Thoc6		Ncbp1
Ncbp1		Nup85
Nup85		Gspt1
Gspt1		Gspt2
Gspt2		Msi1
Msi1		Papola
Papola		Ppp2ca
Ppp2ca		Ppp2cb
Ppp2cb		Ppp2r3d
Ppp2r3d		Ppp2r5d
Ppp2r5d		Rngtt
Rngtt		Ppp2r5c
Ppp2r5c		Ppp2r5e
Ppp2r5e		Cpsf2
Cpsf2		Ppp2r1a
Ppp2r1a		Ppp2r2d
Ppp2r2d		Cpsf4
Cpsf4		Pabpn1
Pabpn1		Cpsf3
Cpsf3		Hbs1l
Hbs1l		Papolb
Papolb		Ppp2r3c
Ppp2r3c		Fip1l1
Fip1l1		Cstf1
Cstf1		Rnmt
Rnmt		Sympk
Sympk		Nudt21
Nudt21		Dazap1
Dazap1		Ppp2r2a
Ppp2r2a		Ppp2r2b
Ppp2r2b		Ppp2r1b
Ppp2r1b		Pcf11
Pcf11		Msi2
Msi2		Cstf2t
Cstf2t		Cpsf1
Cpsf1		Clp1
Clp1		Smg6
Smg6		Pelo
Pelo		Cstf2
Cstf2		Papolg
Papolg		Etf1
Etf1		Ppp2r5b
Ppp2r5b		Smg7
Smg7		Ppp2r5a
Ppp2r5a		Cstf3
Cstf3		Smg5
Smg5		Smg1
Smg1		Ppp2r3a
Ppp2r3a		Cpsf7
Cpsf7		Ppp2r2c
Ppp2r2c		Pabpn1l
Pabpn1l		Cpsf6
Cpsf6		Btg1
Btg1		Btg2
Btg2		Ddx6
Ddx6		Hspd1
Hspd1		Hspa9
Hspa9		Cnot7
Cnot7		Tob1
Tob1		Lsm2
Lsm2		Exosc5
Exosc5		Lsm4
Lsm4		Exosc9
Exosc9		Exosc10
Exosc10		Cnot4
Cnot4		Btg4
Btg4		Tob2
Tob2		C1d
C1d		Rqcd1
Rqcd1		Wdr61
Wdr61		Exosc3
Exosc3		Exosc7
Exosc7		Exosc1
Exosc1		Lsm1
Lsm1		Lsm3
Lsm3		Mphosph6
Mphosph6		Cnot8
Cnot8		Dcps
Dcps		Exosc8
Exosc8		Dcp2
Dcp2		Cnot2
Cnot2		Dhx36
Dhx36		Skiv2l2
Skiv2l2		Exosc6
Exosc6		Pan3
Pan3		Dis3
Dis3		Parn
Parn		Dcp1a
Dcp1a		Naa38
Naa38		Lsm6
Lsm6		Cnot10
Cnot10		Pan2
Pan2		Cnot6
Cnot6		Skiv2l
Skiv2l		Exosc4
Exosc4		Papd7
Papd7		Ttc37
Ttc37		Patl1
Patl1		Exosc2
Exosc2		Cnot6l
Cnot6l		Cnot3
Cnot3		Edc4
Edc4		Dcp1b
Dcp1b		Zcchc7
Zcchc7		Edc3
Edc3		Gtf2h1
Gtf2h1		Gtf2h4
Gtf2h4		Gtf2i
Gtf2i		Taf6
Taf6		Tbp
Tbp		Gtf2h2
Gtf2h2		Taf7
Taf7		Taf10
Taf10		Gtf2ird1
Gtf2ird1		Taf12
Taf12		Gtf2e2
Gtf2e2		Gtf2f2
Gtf2f2		Taf11
Taf11		Gtf2a1l
Gtf2a1l		Taf4b
Taf4b		Gtf2e1
Gtf2e1		Taf7l
Taf7l		Ston1
Ston1		Gtf2a1
Gtf2a1		Gtf2f1
Gtf2f1		Taf13
Taf13		Taf5l
Taf5l		Gtf2h3
Gtf2h3		Taf6l
Taf6l		Taf5
Taf5		Taf4a
Taf4a		Gtf2b
Gtf2b		Tbpl1
Tbpl1		Taf1
Taf1		Taf2
Taf2		Fen1
Fen1		Lig1
Lig1		Mcm3
Mcm3		Mcm2
Mcm2		Mcm4
Mcm4		Mcm5
Mcm5		Mcm6
Mcm6		Mcm7
Mcm7		Pcna
Pcna		Rfc1
Rfc1		Rfc2
Rfc2		Rnaseh1
Rnaseh1		Rpa2
Rpa2		Rnaseh2b
Rnaseh2b		Rnaseh2c
Rnaseh2c		Rpa3
Rpa3		Rpa1
Rpa1		Rfc3
Rfc3		Rnaseh2a
Rnaseh2a		Rfc5
Rfc5		Rfc4
Rfc4		Dna2
Dna2		Ssbp1
Ssbp1		Aqr
Aqr		Dhx15
Dhx15		Ddx5
Ddx5		Srsf10
Srsf10		Hnrnpc
Hnrnpc		Hnrnpa1
Hnrnpa1		Hnrnpk
Hnrnpk		Hspa8
Hspa8		Hspa1l
Hspa1l		Hspa1b
Hspa1b		Hspa2
Hspa2		Rbmx
Rbmx		Sf3a2
Sf3a2		Sart1
Sart1		Srsf2
Srsf2		Srsf3
Srsf3		Srsf5
Srsf5		Tra2b
Tra2b		Eftud2
Eftud2		Snrpc
Snrpc		Snrnp70
Snrnp70		Snrpb
Snrpb		Snrpb2
Snrpb2		Snrpe
Snrpe		U2af2
U2af2		Pcbp1
Pcbp1		Cherp
Cherp		Prpf19
Prpf19		Usp39
Usp39		Hnrnpu
Hnrnpu		Plrg1
Plrg1		Prpf40b
Prpf40b		Pqbp1
Pqbp1		Ppie
Ppie		Tcerg1
Tcerg1		Prpf40a
Prpf40a		Srsf4
Srsf4		Isy1
Isy1		Wbp11
Wbp11		Dhx38
Dhx38		0610009D07Rik
0610009D07Rik		Cwc15
Cwc15		Sf3b5
Sf3b5		Snw1
Snw1		Zmat2
Zmat2		Snrnp40
Snrnp40		Snrnp27
Snrnp27		Ctnnbl1
Ctnnbl1		Rbm22
Rbm22		Crnkl1
Crnkl1		Prpf38b
Prpf38b		Rbm25
Rbm25		Prpf18
Prpf18		Snrpd3
Snrpd3		Xab2
Xab2		Sf3a1
Sf3a1		2610101N10Rik
2610101N10Rik		Puf60
Puf60		Srsf6
Srsf6		Snrpg
Snrpg		Bcas2
Bcas2		Phf5a
Phf5a		Syf2
Syf2		Ppil1
Ppil1		Prpf6
Prpf6		Snrpa1
Snrpa1		Prpf31
Prpf31		Dhx16
Dhx16		Snrpf
Snrpf		Prpf4
Prpf4		Prpf3
Prpf3		Cdc5l
Cdc5l		Cdc40
Cdc40		Ddx42
Ddx42		Ccdc12
Ccdc12		Ddx23
Ddx23		Sf3a3
Sf3a3		Smndc1
Smndc1		Hnrnpm
Hnrnpm		Rbm17
Rbm17		Sf3b1
Sf3b1		Tra2a
Tra2a		Sf3b3
Sf3b3		Snrpd2
Snrpd2		Sf3b4
Sf3b4		Srsf9
Srsf9		U2af1
U2af1		Srsf1
Srsf1		Prpf8
Prpf8		Slu7
Slu7		Hspa1a
Hspa1a		Ddx46
Ddx46		Dhx8
Dhx8		Srsf7
Srsf7		Hnrnpa3
Hnrnpa3		Prpf38a
Prpf38a		Sf3b2
Sf3b2		Snrnp200
Snrnp200		Ifng
Ifng		Psmb9
Psmb9		Psmb8
Psmb8		Psmd7
Psmd7		Psma2
Psma2		Psma3
Psma3		Psmb1
Psmb1		Psmb10
Psmb10		Psmb4
Psmb4		Psmb6
Psmb6		Psmb7
Psmb7		Psmc1
Psmc1		Psmc2
Psmc2		Psmc3
Psmc3		Psmc5
Psmc5		Psmd4
Psmd4		Psme1
Psme1		Psme2
Psme2		Psme3
Psme3		Shfm1
Shfm1		Psmd2
Psmd2		Psmd3
Psmd3		Psmc4
Psmc4		Psmd13
Psmd13		Psma1
Psma1		Psma4
Psma4		Gm8394 /// Psma5
Gm8394 /// Psma5		Psma6
Psma6		Psma7
Psma7		Psmb2
Psmb2		Psmb3
Psmb3		Psmd8
Psmd8		Psmd14
Psmd14		Psmd6
Psmd6		Pomp
Pomp		Psmd12
Psmd12		Psmc6
Psmc6		Psmd11
Psmd11		Psmd1
Psmd1		Psma8
Psma8		Psmb11
Psmb11		Psme4
Psme4		Psmf1
Psmf1		Parp1
Parp1		Parp2
Parp2		Apex1
Apex1		Lig3
Lig3		Mbd4
Mbd4		Nthl1
Nthl1		Ogg1
Ogg1		Polb
Polb		Ung
Ung		Xrcc1
Xrcc1		Poll
Poll		Mutyh
Mutyh		Smug1
Smug1		Neil1
Neil1		Apex2
Apex2		Neil3
Neil3		Parp3
Parp3		Mpg
Mpg		Parp4
Parp4		Cdk7
Cdk7		Ddb1
Ddb1		Ercc1
Ercc1		Ercc2
Ercc2		Ercc3
Ercc3		Mnat1
Mnat1		Rad23a
Rad23a		Rad23b
Rad23b		Xpa
Xpa		Xpc
Xpc		Ercc5
Ercc5		Cetn2
Cetn2		Ercc4
Ercc4		Rbx1
Rbx1		Gtf2h5
Gtf2h5		Ccnh
Ccnh		Ercc8
Ercc8		Cul4b
Cul4b		Cul4a
Cul4a		Ddb2
Ddb2		Ercc6
Ercc6		Mlh1
Mlh1		Msh2
Msh2		Msh3
Msh3		Msh6
Msh6		Pms2
Pms2		Exo1
Exo1		Mlh3
Mlh3		Blm
Blm		Brca2
Brca2		Mre11a
Mre11a		Rad50
Rad50		Rad51
Rad51		Rad51l1
Rad51l1		Rad51l3
Rad51l3		Rad52
Rad52		Rad54l
Rad54l		Top3a
Top3a		Top3b
Top3b		Nbn
Nbn		Xrcc2
Xrcc2		Mus81
Mus81		Xrcc3
Xrcc3		Rad51c
Rad51c		Eme1
Eme1		Rad54b
Rad54b		Xrcc6
Xrcc6		Prkdc
Prkdc		Dntt
Dntt		Xrcc5
Xrcc5		Polm
Polm		Nhej1
Nhej1		Dclre1c
Dclre1c		Lig4
Lig4		Akt2
Akt2		Atf4
Atf4		Bdnf
Bdnf		Cacna1a
Cacna1a		Cacna1b
Cacna1b		Cacna1c
Cacna1c		Cacna1d
Cacna1d		Cacna1e
Cacna1e		Cacna1g
Cacna1g		Cacna1s
Cacna1s		Cacna2d1
Cacna2d1		Cacna2d3
Cacna2d3		Cacnb1
Cacnb1		Cacnb2
Cacnb2		Cacnb3
Cacnb3		Cacnb4
Cacnb4		Cacng1
Cacng1		Cacng2
Cacng2		Casp3
Casp3		Cd14
Cd14		Cdc25b
Cdc25b		Cdc42
Cdc42		Chuk
Chuk		Crk
Crk		Crkl
Crkl		Daxx
Daxx		Gadd45a
Gadd45a		Ddit3
Ddit3		Dusp2
Dusp2		Egf
Egf		Egfr
Egfr		Elk1
Elk1		Elk4
Elk4		Mecom
Mecom		Fas
Fas		Fasl
Fasl		Fgf1
Fgf1		Fgf10
Fgf10		Fgf11
Fgf11		Fgf12
Fgf12		Fgf13
Fgf13		Fgf14
Fgf14		Fgf15
Fgf15		Fgf17
Fgf17		Fgf18
Fgf18		Fgf2
Fgf2		Fgf3
Fgf3		Fgf4
Fgf4		Fgf5
Fgf5		Fgf6
Fgf6		Fgf7
Fgf7		Fgf8
Fgf8		Fgf9
Fgf9		Fgfr1
Fgfr1		Fgfr3
Fgfr3		Fgfr4
Fgfr4		Fos
Fos		Gna12
Gna12		Gng12
Gng12		Grb2
Grb2		Nr4a1
Nr4a1		Hras1
Hras1		Hspb1
Hspb1		Ikbkb
Ikbkb		Ikbkg
Ikbkg		Il1a
Il1a		Il1b
Il1b		Il1r1
Il1r1		Il1r2
Il1r2		Jun
Jun		Jund
Jund		Kras
Kras		Stmn1
Stmn1		Mapkapk2
Mapkapk2		Mapkapk5
Mapkapk5		Max
Max		Mef2c
Mef2c		Mknk1
Mknk1		Mknk2
Mknk2		Mos
Mos		Mras
Mras		Mapt
Mapt		Myc
Myc		Gadd45b
Gadd45b		Nf1
Nf1		Nfatc2
Nfatc2		Nfkb1
Nfkb1		Nfkb2
Nfkb2		Ngf
Ngf		Nlk
Nlk		Nras
Nras		Ntf3
Ntf3		Ntrk1
Ntrk1		Ntrk2
Ntrk2		Dusp8
Dusp8		Pak1
Pak1		Pdgfa
Pdgfa		Pdgfb
Pdgfb		Pdgfra
Pdgfra		Pdgfrb
Pdgfrb		Prkaca
Prkaca		Prkacb
Prkacb		Prkca
Prkca		Prkcb
Prkcb		Prkcc
Prkcc		Ppm1b
Ppm1b		Ppp3ca
Ppp3ca		Ppp3cb
Ppp3cb		Ppp3cc
Ppp3cc		Ppp3r1
Ppp3r1		Ppp3r2
Ppp3r2		Ppp5c
Ppp5c		Mapk11
Mapk11		Mapk8ip1
Mapk8ip1		Prkx
Prkx		Dusp1
Dusp1		Ptpn5
Ptpn5		Ptprr
Ptprr		Rac1
Rac1		Rac2
Rac2		Rasgrp2
Rasgrp2		Rasgrf1
Rasgrf1		Rasgrf2
Rasgrf2		Rasgrp1
Rasgrp1		Rela
Rela		Relb
Relb		Rps6ka1
Rps6ka1		Rps6ka2
Rps6ka2		Rras
Rras		Sos1
Sos1		Sos2
Sos2		Srf
Srf		Tgfb1
Tgfb1		Tgfb2
Tgfb2		Tgfb3
Tgfb3		Tgfbr1
Tgfbr1		Tgfbr2
Tgfbr2		Tnf
Tnf		Tnfrsf1a
Tnfrsf1a		Traf2
Traf2		Traf6
Traf6		Trp53
Trp53		Akt3
Akt3		Gadd45g
Gadd45g		Map2k5
Map2k5		Mapk7
Mapk7		Map2k1
Map2k1		Map2k2
Map2k2		Map2k3
Map2k3		Map2k4
Map2k4		Map2k6
Map2k6		Map2k7
Map2k7		Map3k1
Map3k1		Map3k11
Map3k11		Map3k12
Map3k12		Map3k2
Map3k2		Map3k3
Map3k3		Map3k4
Map3k4		Map3k5
Map3k5		Map3k7
Map3k7		Map3k8
Map3k8		Map4k1
Map4k1		Map4k2
Map4k2		Mapk1
Mapk1		Mapk10
Mapk10		Mapk13
Mapk13		Mapk14
Mapk14		Mapk3
Mapk3		Mapk8
Mapk8		Mapk9
Mapk9		Map4k4
Map4k4		Ecsit
Ecsit		Mapk12
Mapk12		Mapk8ip3
Mapk8ip3		Map3k6
Map3k6		Map3k14
Map3k14		Cacng3
Cacng3		Cacng4
Cacng4		Cacng6
Cacng6		Cacna1f
Cacna1f		Stk3
Stk3		Dusp14
Dusp14		Rps6ka4
Rps6ka4		Cacna2d2
Cacna2d2		Cacna1h
Cacna1h		Stk4
Stk4		Mapk8ip2
Mapk8ip2		Dusp10
Dusp10		Fgf23
Fgf23		B230120H23Rik
B230120H23Rik		Tab1
Tab1		Rras2
Rras2		Rps6ka6
Rps6ka6		Fgf22
Fgf22		Dusp6
Dusp6		Tab2
Tab2		Flnc
Flnc		2010110P09Rik
2010110P09Rik		Dusp16
Dusp16		Dusp3
Dusp3		Rps6ka5
Rps6ka5		Nfatc4
Nfatc4		Dusp9
Dusp9		Rapgef2
Rapgef2		Ntf5
Ntf5		Fgf20
Fgf20		Fgf16
Fgf16		Cacng7
Cacng7		Cacng8
Cacng8		Mapkapk3
Mapkapk3		Dusp22
Dusp22		Arrb1
Arrb1		Braf
Braf		Rap1a
Rap1a		Raf1
Raf1		Rps6ka3
Rps6ka3		Rasa2
Rasa2		Cacng5
Cacng5		Rac3
Rac3		Flna
Flna		Rap1b
Rap1b		Arrb2
Arrb2		Taok1
Taok1		Rasa1
Rasa1		Pak2
Pak2		Map4k3
Map4k3		Rasgrp4
Rasgrp4		Dusp7
Dusp7		Rasgrp3
Rasgrp3		Dusp5
Dusp5		Flnb
Flnb		Dusp4
Dusp4		Cacna2d4
Cacna2d4		Taok3
Taok3		Taok2
Taok2		Abl1
Abl1		Abl2
Abl2		Araf
Araf		Areg
Areg		Bad
Bad		Btc
Btc		Camk2a
Camk2a		Camk2b
Camk2b		Camk2g
Camk2g		Cbl
Cbl		Cdkn1a
Cdkn1a		Cdkn1b
Cdkn1b		Erbb2
Erbb2		Erbb3
Erbb3		Erbb4
Erbb4		Ereg
Ereg		Ptk2
Ptk2		Gab1
Gab1		Hbegf
Hbegf		Nck1
Nck1		Nck2
Nck2		Nrg3
Nrg3		Pak3
Pak3		Pik3r1
Pik3r1		Pik3r2
Pik3r2		Pik3r3
Pik3r3		Shc1
Shc1		Shc3
Shc3		Src
Src		Stat5a
Stat5a		Stat5b
Stat5b		Tgfa
Tgfa		Gsk3b
Gsk3b		Mtor
Mtor		Rps6kb2
Rps6kb2		Pak4
Pak4		Rps6kb1
Rps6kb1		Cblc
Cblc		Nrg4
Nrg4		Camk2d
Camk2d		Cblb
Cblb		Nrg1
Nrg1		Pak6
Pak6		Shc2
Shc2		Pak7
Pak7		Pik3r5
Pik3r5		Nrg2
Nrg2		Rhoa
Rhoa		Cxcr5
Cxcr5		Ccr6
Ccr6		Cxcr2
Cxcr2		Cxcr3
Cxcr3		Cxcr4
Cxcr4		Ccr1
Ccr1		Ccr9
Ccr9		Ccr1l1
Ccr1l1		Ccr3
Ccr3		Ccr2
Ccr2		Ccr4
Ccr4		Ccr5
Ccr5		Ccr7
Ccr7		Ccr8
Ccr8		Ccr10
Ccr10		Bcar1
Bcar1		Csk
Csk		Cx3cr1
Cx3cr1		Fgr
Fgr		Gnai1
Gnai1		Gnai2
Gnai2		Gnai3
Gnai3		Gnb1
Gnb1		Gnb2
Gnb2		Gnb3
Gnb3		Gnb4
Gnb4		Gnb5
Gnb5		Gngt1
Gngt1		Gng10
Gng10		Gng2
Gng2		Gng3
Gng3		Gng4
Gng4		Gng7
Gng7		Gng8
Gng8		Gngt2
Gngt2		Grk4
Grk4		Grk5
Grk5		Cxcl1
Cxcl1		Hck
Hck		Cxcl10
Cxcl10		Itk
Itk		Jak2
Jak2		Jak3
Jak3		Xcl1
Xcl1		Cxcl9
Cxcl9		Ncf1
Ncf1		Nfkbia
Nfkbia		Nfkbib
Nfkbib		Prkcd
Prkcd		Prkcz
Prkcz		Ptk2b
Ptk2b		Pxn
Pxn		Rock1
Rock1		Rock2
Rock2		Ccl1
Ccl1		Ccl11
Ccl11		Ccl17
Ccl17		Ccl2
Ccl2		Ccl20
Ccl20		Ccl22
Ccl22		Ccl25
Ccl25		Ccl27a /// Ccl27b
Ccl27a /// Ccl27b		Ccl3
Ccl3		Ccl4
Ccl4		Ccl5
Ccl5		Ccl6
Ccl6		Ccl7
Ccl7		Ccl9
Ccl9		Cxcl15
Cxcl15		Cxcl2
Cxcl2		Cxcl5
Cxcl5		Cx3cl1
Cx3cl1		Cxcl12
Cxcl12		Stat1
Stat1		Stat2
Stat2		Stat3
Stat3		Tiam1
Tiam1		Vav1
Vav1		Vav2
Vav2		Was
Was		Xcr1
Xcr1		Tiam2
Tiam2		Grk1
Grk1		Grk6
Grk6		Cxcl13
Cxcl13		Cxcl11
Cxcl11		Ccl24
Ccl24		Foxo3
Foxo3		Pf4
Pf4		Ccl28
Ccl28		Vav3
Vav3		Cxcl14
Cxcl14		Ppbp
Ppbp		Gng13
Gng13		Gng11
Gng11		Cxcl16
Cxcl16		Wasl
Wasl		Cxcr6
Cxcr6		Pard3
Pard3		Adrbk1
Adrbk1		Elmo1
Elmo1		Prex1
Prex1		Gsk3a
Gsk3a		Inpp5d
Inpp5d		Itpr1
Itpr1		Itpr2
Itpr2		Itpr3
Itpr3		Dgke
Dgke		Calml3
Calml3		Cds1
Cds1		Calm4
Calm4		Dgkz
Dgkz		Dgkg
Dgkg		Dgkq
Dgkq		Cds2
Cds2		Dgkb
Dgkb		Dgkd
Dgkd		Dgki
Dgki		Dgkh
Dgkh		Atm
Atm		Bub1
Bub1		Bub1b
Bub1b		Bub3
Bub3		Ccna1
Ccna1		Ccna2
Ccna2		Ccnb2
Ccnb2		Ccnd1
Ccnd1		Ccnd2
Ccnd2		Ccnd3
Ccnd3		Ccne1
Ccne1		Ccne2
Ccne2		Cdc25a
Cdc25a		Cdc25c
Cdc25c		Cdk1
Cdk1		Cdc45
Cdc45		Cdc7
Cdc7		Cdk2
Cdk2		Cdk6
Cdk6		Cdkn1c
Cdkn1c		Cdkn2a
Cdkn2a		Cdkn2b
Cdkn2b		Cdkn2c
Cdkn2c		Cdkn2d /// Gm4694
Cdkn2d /// Gm4694		Chek1
Chek1		Crebbp
Crebbp		Smc3
Smc3		E2f1
E2f1		E2f3
E2f3		E2f5
E2f5		Hdac2
Hdac2		Mad1l1
Mad1l1		Smad2
Smad2		Smad3
Smad3		Smad4
Smad4		Mdm2
Mdm2		Orc1
Orc1		Orc2
Orc2		Plk1
Plk1		Rad21
Rad21		Rb1
Rb1		Rbl1
Rbl1		Rbl2
Rbl2		Stag1
Stag1		Stag2
Stag2		Skp1a
Skp1a		Tfdp1
Tfdp1		Ttk
Ttk		Wee1
Wee1		Ywhae
Ywhae		Ywhag
Ywhag		Ywhah
Ywhah		LOC100503129 /// Ywhaq
LOC100503129 /// Ywhaq		LOC100505062 /// Ywhaz
LOC100505062 /// Ywhaz		Zbtb17
Zbtb17		Cdc6
Cdc6		Smc1a
Smc1a		Orc4
Orc4		Orc5
Orc5		Cul1
Cul1		Dbf4
Dbf4		Skp2
Skp2		Pttg1
Pttg1		Orc3
Orc3		Chek2
Chek2		Anapc4
Anapc4		Cdc23
Cdc23		Ywhab
Ywhab		Sfn
Sfn		Anapc7
Anapc7		Fzr1
Fzr1		Orc6
Orc6		Anapc5
Anapc5		Anapc11
Anapc11		Cdc26
Cdc26		Anapc10
Anapc10		Anapc13
Anapc13		Cdc16
Cdc16		Mad2l2
Mad2l2		Anapc2
Anapc2		E2f4
[truncated: 1,743 more rows]

## Sheet: 24h
24hr upregulated_Gene Symbol	24hr downregulated_Gene Symbol	24hr_Gene Symbol(3279)	24hr_Microarray overlap(362)
Comt1	Aco1	Comt1	Ablim1
Cyp11a1	Aco2	Cyp11a1	Cacnb2
Cyp11b2	Cs	Cyp11b2	Camkk2
Cyp17a1	Dld	Cyp17a1	Capn2
Cyp19a1	Fh1	Cyp19a1	Cdh1
Cyp1a1	Idh1	Cyp1a1	Col4a1
Cyp1b1	Idh3g	Cyp1b1	Col4a2
Cyp21a1	Mdh2	Cyp21a1	Cpt1a
Cyp3a11	Mdh1	Cyp3a11	Dgkg
Cyp3a13	Ogdh	Cyp3a13	Dkk1
Cyp3a16	Pck1	Cyp3a16	Dll1
Cyp7a1	Pcx	Cyp7a1	Dll3
Cyp7b1	Pdha1	Cyp7b1	Dnmt3b
H2-Ke6	Pdha2	H2-Ke6	Efna3
Hsd11b1	Sucla2	Hsd11b1	Epas1
Hsd11b2	Suclg2	Hsd11b2	Epb4.1l3
Hsd17b1	Suclg1	Hsd17b1	Epha4
Hsd17b2	Sdhc	Hsd17b2	Fabp7
Hsd17b3	Sdhd	Hsd17b3	Gad1
Hsd17b7	Sdha	Hsd17b7	Gadd45g
Hsd3b1	Sdhb	Hsd3b1	Gna14
Hsd3b2	Idh3a	Hsd3b2	Gng2
Hsd3b5	Pdhb	Hsd3b5	Grin2c
Sult1e1	Pck2	Sult1e1	H2-Ab1
Sts	Dlst	Sts	Id3
Ugt2b5	Acly	Ugt2b5	Itga8
Hsd17b6	Idh3b	Hsd17b6	Itpkb
Sult2b1	Dlat	Sult2b1	Kcnma1
Hsd17b12	Idh2	Hsd17b12	Lama1
Cyp3a25	Aspa	Cyp3a25	Lef1
Srd5a3	Adsl	Srd5a3	Man1c1
Ugt2b1	Adssl1	Ugt2b1	Map2k6
Ugt2a3	Agxt	Ugt2a3	Mapk13
Srd5a1	Ass1	Srd5a1	Met
Srd5a2		Srd5a2	Myc
Ugt2b34	Gad1	Ugt2b34	Myl7
Akr1c18	Gad2	Akr1c18	Nfatc1
Cyp11b1	Gfpt1	Cyp11b1	Nme5
Akr1d1	Gfpt2	Akr1d1	Notch1
Ugt2b36	Glul	Ugt2b36	Pak3
Cyp3a44	Gls	Cyp3a44	Pdgfra
Entpd1	Glud1	Entpd1	Plce1
Entpd6	Got1	Entpd6	Plcg2
Entpd5	Got2	Entpd5	Plxna2
Dck	Asns	Dck	Plxna4
Itpa	Nit2	Itpa	Ppp3ca
Nme1	Cad	Nme1	Prex1
Nme2	Ddo	Nme2	Prkce
Pnp	Acy3	Pnp	Rasgrp3
Pola1	Gpt	Pola1	Reln
Pola2	Lao1	Pola2	Sema6a
Pold1	Asl	Pold1	Sfrp1
Pold2	Aldh4a1	Pold2	Sgcb
Pole	Aldh5a1	Pole	Smad1
Pole2	Cps1	Pole2	Snai1
Prim1	Ppat	Prim1	Thbs2
Prim2	Abat	Prim2	Tnc
Polr1c	Acadm	Polr1c	Unc5c
Polr1b	Aldh1a1	Polr1b	Vav3
Polr1d	Aldh2	Polr1d	Wnt3
Polr1a	Aldh3a2	Polr1a	Zic2
Polr2a	Aoc3	Polr2a	Cd59a
Polr2c	Srm	Polr2c	Flt1
Polr2j	Mlycd	Polr2j	Lefty2
Rrm1	Aldh9a1	Rrm1	Prickle1
Rrm2	Dpys	Rrm2	Rhobtb1
Tk1	Aldh1b1	Tk1	Sema6d
Dtymk	Ehhadh	Dtymk	Fbp1
Cmpk2	Echs1	Cmpk2	Hck
Tyms	Hadha	Tyms	Itpr1
Uck1	Dpyd	Uck1	Ntf3
Umps	Upb1	Umps	A4galt
Upp1	Aldh7a1	Upp1	Aanat
Nt5e	Hibch	Nt5e	Abl1
Txnrd2	Cndp1	Txnrd2	Abl2
Txnrd1	Amy1	Txnrd1	Acadl
Nt5c	G6pc	Nt5c	Acin1
Ctps	Gaa	Ctps	Acly
Nme6	Gpi1	Nme6	Actn1
Ctps2	Gys1	Ctps2	Adcy3
Ak3	Hk1	Ak3	Adcy5
Nme4	Hk2	Nme4	Adcy6
Dhodh	Enpp1	Dhodh	Adcy8
Tk2	Pygm	Tk2	Adi1
Pole3	Ugdh	Pole3	Adipor1
Polr1e	Ugt2b5	Polr1e	Adra1b
Dpys	Treh	Dpys	Agap3
Znrd1	Pgm1	Znrd1	Agpat3
Nudt2	Uxs1	Nudt2	Agrp
Polr2e	Pgm2l1	Polr2e	Akt2
Cmpk1	Ugt2b1	Cmpk1	Aldh1b1
Pole4	Ugt2a3	Pole4	Aldh1l1
Polr3k	Gbe1	Polr3k	Ap2b1
Polr3d	Ganc	Polr3d	Aqp5
Entpd4	Agl	Entpd4	Arap2
Polr3g	Ugt2b34	Polr3g	Arnt
Polr2g	Gck	Polr2g	Arrb1
Pold3	Gusb	Pold3	Atm
Uckl1	Pygb	Uckl1	Atp2b1
Polr2d	Pygl	Polr2d	Atp2b2
Cad	Enpp3	Cad	B230120H23Rik
Pold4	Hk3	Pold4	Bace2
Polr2f	Ugp2	Polr2f	Bbc3
Polr3gl	Ugt2b36	Polr3gl	Bcat1
Polr2i	Gys2	Polr2i	Bdh1
Polr3f	Mgam	Polr3f	Bhmt
Polr3b	Dad1	Polr3b	Blnk
Nt5c1b	Dpagt1	Nt5c1b	Cacna1a
Pnpt1	Adnp /// Dpm1	Pnpt1	Cacna1d
Entpd8	Dpm2	Entpd8	Cacna1s
Cda	Ganab	Cda	Cacna2d2
Polr3c	B4galt1	Polr3c	Cacna2d3
Nme5	Stt3a	Nme5	Cacna2d4
Cant1	Man1a	Cant1	Cacnb4
Upp2	Man2a1	Upp2	Cacng5
Nt5c2	Mgat1	Nt5c2	Camk2a
Polr3h	Mgat3	Polr3h	Camk2d
Uck2	Rpn2	Uck2	Cant1
Dpyd	St6gal1	Dpyd	Cav1
Upb1	B4galt2 /// Ccdc24	Upb1	Ccbl2
Nt5m	Fut8	Nt5m	Ccdc12
Nt5c3	Alg2	Nt5c3	Ccnd3
Dut	Dolpp1	Dut	Ccr5
Nme7	B4galt3	Nme7	Cd247
Entpd3	Mogs	Entpd3	Cd47
Polr3a	Alg5	Polr3a	Cdc14b
Polr2b	Alg14	Polr2b	Cdc6
Txnrd3	4933434I20Rik	Txnrd3	Cdk6
Dctd	Mgat4c	Dctd	Cds1
Rrm2b	Alg13	Rrm2b	Chd8
Agxt	Stt3b	Agxt	Chit1
Alas1	Dpm3	Alas1	Chmp5
Alas2	Tusc3	Alas2	Cldn4
Aoc3	Alg9	Aoc3	Clp1
Bhmt	Mgat4b	Bhmt	Cr2
Cbs	Mgat5	Cbs	Crh
Dao	Man2a2	Dao	Csk
Dld	Alg11	Dld	Csnk1g2
Gamt	Alg3	Gamt	Ctnnbl1
Gnmt	Mgat2	Gnmt	Cul5
Maoa	Alg12	Maoa	Cx3cl1
Pipox	Man1b1	Pipox	Cyld
Shmt1	Dolk	Shmt1	Cyp17a1
Srr	Man1c1	Srr	Daam1
Tdh	St6gal2	Tdh	Dapk2
Gatm	Mgat4a	Gatm	Ddit4
Tha1	Glt28d2	Tha1	Degs1
Dmgdh	Alg6	Dmgdh	Dgkh
Psph	Alg10b	Psph	Dgki
Gldc	Alg8	Gldc	Dgkz
Cth	Galnt1	Cth	Diap3
Shmt2	Galnt3	Shmt2	Dnmt3a
Maob	Galnt4	Maob	Dock1
Aldh7a1	Gcnt1	Aldh7a1	Dock2
Sardh	St3gal1	Sardh	Dtx3
Chdh	St3gal2	Chdh	Dusp1
Sds	St6galnac1	Sds	Dusp4
Glyctk	B4galt5	Glyctk	Dync1i1
Phgdh	C1galt1c1	Phgdh	Dync1li1
Agxt2	Galntl5	Agxt2	Eef1a2
Amd1	Gcnt3	Amd1	Efna5
Mat1a	Galntl2	Mat1a	Ehd1
Cdo1	Galnt2	Cdo1	Ehd3
Dnmt1	Galnt7	Dnmt1	Eif1a
Trdmt1	Galntl1	Trdmt1	Eif2b5
Dnmt3a	Galnt6	Dnmt3a	Eif3h
Dnmt3b	Galntl4	Dnmt3b	Eif4b
Ldha	Galntl6	Ldha	Eif4e
Ldhb	B3gnt6	Ldhb	Elmo1
Ldhc	Fut4	Ldhc	Endod1
Srm	Fut7	Srm	Epb4.1l2
Tst	Fut9	Tst	Epha1
Dnmt3l	Lfng	Dnmt3l	Epha3
Apip	Mfng	Apip	Epha6
Mtap	Rfng	Mtap	Espl1
Enoph1	St3gal3	Enoph1	Etf1
Mri1	Plod3	Mri1	Ets2
Ahcyl2	Pomgnt1	Ahcyl2	Etv6
Lao1	Pofut2	Lao1	Exoc4
Adi1	Chst10	Adi1	Fads2
Ldhal6b	Pomt1	Ldhal6b	Fbxw8
Mat2b	Ogt	Mat2b	Fert2
Ahcyl1	Pofut1	Ahcyl1	Fgf6
Mat2a	Pomt2	Mat2a	Fgfr1
Tat	Gxylt1	Tat	Fhit
Mtr	Poglut1	Mtr	Flnb
Mpst	Gxylt2	Mpst	Fyn
Ahcy	Glt25d1	Ahcy	Galnt7
Aldh1a1	Glt25d2	Aldh1a1	Gck
Aldh2	B3galtl	Aldh2	Gcnt2
Aldh3a2	Chi3l1	Aldh3a2	Git1
Hadh	Cmah	Hadh	Gli3
Nsd1	Cmas	Nsd1	Gmds
Ogdh	Galt	Ogdh	Gna12
Plod1	Galk1	Plod1	Gnaq
Suv39h1	Hexa	Suv39h1	Gp1ba
Aadat	Hexb	Aadat	Gpat2
Plod2	Renbp	Plod2	Gpi1
Plod3	Tsta3	Plod3	Grid2
Aass	Gnpda1	Aass	Grk5
Aldh9a1	Pmm1	Aldh9a1	Grm1
Suv39h2	Gne	Suv39h2	Grm5
Setd8	Pmm2	Setd8	Gsk3a
Aldh1b1	Gnpnat1	Aldh1b1	Gsk3b
Setd7	Nagk	Setd7	Gucy1a3
Ehhadh	Nanp	Ehhadh	Herc3
Setmar	Gnpda2	Setmar	Hk2
Ehmt1	Gmppa	Ehmt1	Hrh2
Dlst	Galk2	Dlst	Hspg2
Setdb1	Chit1	Setdb1	Igsf5
Echs1	Cyb5r1	Echs1	Il3
Hadha	Npl	Hadha	Immp2l
Whsc1	Gale	Whsc1	Impa2
Ehmt2	Fpgt	Ehmt2	Inpp4a
Acat1	Chia	Acat1	Inpp5a
Bbox1	Nans	Bbox1	Iqgap2
Ash1l	LOC640502 /// Uap1	Ash1l	Irak3
Tmlhe	Cyb5r3	Tmlhe	Irs1
Setd1b	Pgm3	Setd1b	Itga5
Dot1l	Mpi	Dot1l	Itgb5
Suv420h1	Gmds	Suv420h1	Itgb6
Suv420h2	Uap1l1	Suv420h2	Itpk1
Setd1a	Fuk	Setd1a	Jam3
Whsc1l1	Amdhd2	Whsc1l1	Kat2b
Glt25d1	Cyb5r2	Glt25d1	Kcnj16
Setd2	Gmppb	Setd2	Lama5
Setdb2	Gla	Setdb2	Lamb3
Glt25d2	Arsa	Glt25d2	Ldha
Gcdh	Asah1	Gcdh	Lfng
Aldh3a1	Glb1	Aldh3a1	Llgl1
Prdx6	Degs1	Prdx6	Lmo7
Ddc	Galc	Ddc	Lpar1
Got1	Gba	Got1	Lpcat3
Got2	Neu1	Got2	Lrp1
Hpd	Ppap2a	Hpd	Lypla2
Mif	Sgpl1	Mif	Magi1
Pah	Smpd1	Pah	Magi2
Aldh1a3	Smpd2	Aldh1a3	Magi3
Aldh3b1	Sphk1	Aldh3b1	Map2k5
Aanat	Sptlc2	Aanat	Map3k3
Aox1	Ugcg	Aox1	Map3k7
Cat	Ugt8a	Cat	Map4k3
Cyp1a2	Neu2	Cyp1a2	Mboat2
Ido1	Ppap2c	Ido1	Mecom
Inmt	Neu3	Inmt	Mrc1
Tph1	Gal3st1	Tph1	Msi1
Wars	Asah2	Wars	Msi2
Tdo2	B4galt6	Tdo2	Mthfd1
Ccbl1	Sphk2	Ccbl1	Myh11
Wars2	Smpd3	Wars2	Myh9
Kynu	Acer3	Kynu	Naga
Afmid	Ppap2b	Afmid	Ncf2
Abp1	Degs2	Abp1	Ndufa9
Kmo	Kdsr	Kmo	Nedd4
Haao	Sgms2	Haao	Nfkb1
Ido2	Smpd4	Ido2	Nme1
Tph2	Sgpp1	Tph2	Nme2
Ccbl2	Acer1	Ccbl2	Nos1
Inpp1	Sgms1	Inpp1	Notch2
Inpp5b	Cerk	Inpp5b	Npr2
Inppl1	Sptlc3	Inppl1	Nrg3
Minpp1	Acer2	Minpp1	Nt5c2
Pik3c2a	Sptlc1	Pik3c2a	Ntrk3
Pik3c2g	Sgpp2	Pik3c2g	Ntsr1
Pik3ca	9130409I23Rik	Pik3ca	Paip1
Pik3cd	Fut1	Pik3cd	Pank2
Pikfyve	Fut2	Pikfyve	Papola
Pip5k1c	Gcnt2	Pip5k1c	Pard3
Pip4k2a	Ggta1	Pip4k2a	Park2
Pip5k1b	St3gal4	Pip5k1b	Parva
Pip5k1a	St8sia1	Pip5k1a	Pde1b
Plcb1	B3galt1	Plcb1	Pdss1
Plcb2	B3galt2	Plcb2	Phgdh
Plcb3	St3gal6	Plcb3	Pip4k2a
Plcb4	B4galt4	Plcb4	Piwil1
Plcd1	Sec1	Plcd1	Pla2g6
Plcd4	B3gnt3	Plcd4	Plcb1
Plcg1	Abo	Plcg1	Plcb4
Inpp5k	B3galt5	Inpp5k	Plxnc1
Pten	B3gnt5	Pten	Pofut2
Synj2	B3gnt1	Synj2	Polr3gl
Tpi1	B3gnt4	Tpi1	Pomt1
Pik3cg	Naga	Pik3cg	Ppap2b
Cdipt	B3galnt1	Cdipt	Prickle2
Impa1	Gbgt1	Impa1	Prkca
Miox	A4galt	Miox	Prkcq
Inpp5e	Slc33a1	Inpp5e	Prkdc
Pi4k2b	B4galnt1	Pi4k2b	Prkg1
Ipmk	St6galnac3	Ipmk	Psma8
Isyna1	St6galnac4	Isyna1	Psmb4
Plcd3	St3gal5	Plcd3	Psmd4
Plce1	St6galnac5	Plce1	Ptk2
Pik3cb	St6galnac6	Pik3cb	Ptprj
Ippk	B3galt4	Ippk	Ptprr
Pi4k2a	St8sia5	Pi4k2a	Pvrl3
Synj1	Hao1	Synj1	Pxn
Aldh6a1	Mut	Aldh6a1	Pygb
Pi4kb	Hao2	Pi4kb	Rab31
Pip4k2b	Pccb	Pip4k2b	Ralgds
Impa2	Pgp	Impa2	Rapgef2
Plcz1	Hyi	Plcz1	Rassf5
Pip4k2c	Afmid	Pip4k2c	Rb1
Inpp5j	Mcee	Inpp5j	Rgs3
Inpp5a	Grhpr	Inpp5a	Rheb
Itpk1	Acat1	Itpk1	Rictor
Pi4ka	Pcca	Pi4ka	Robo1
Pik3c3	Glyctk	Pik3c3	Robo3
Pip5kl1	Acads	Pip5kl1	Rps10
Itpka	Hmgcl	Itpka	Rptor
Inpp4b	Hmgcs2	Inpp4b	Runx1
Plcg2	Acsm3	Plcg2	Sema4c
Inpp4a	Oxct2a	Inpp4a	Setd1b
Itpkb	Oxct1	Itpkb	Sgms1
Ocrl	Bdh2	Ocrl	Sgpp1
Ache	Bdh1	Ache	Sh3gl3
Chat	Aacs	Chat	Sh3kbp1
Chkb	Akr1c6	Chkb	Shc3
Chka	Acsm1	Chka	Slc12a2
Pcyt1a	Hmgcs1	Pcyt1a	Slc27a4
Dgka	L2hgdh	Dgka	Slit1
Gpd1	Acsm2	Gpd1	Slit2
Gnpat	Acsm5	Gnpat	Slit3
Gpam	Ggps1	Gpam	Smg6
Lpcat3	Hmgcr	Lpcat3	Smndc1
Lcat	Mvk	Lcat	Sorbs1
Pemt	Pdss1	Pemt	Sort1
Lypla1	Dhdds	Lypla1	Spire1
Pla2g1b	Pmvk	Pla2g1b	Sptlc2
Pla2g2a	Fdps	Pla2g2a	Srgap2
Pla2g2c	Mvd	Pla2g2c	Srsf4
Pla2g2d	Idi1	Pla2g2d	Srsf9
Pla2g4a	Rplp0	Pla2g4a	St3gal3
Pla2g5	Fau	Pla2g5	St6gal1
Pld1	Rps2	Pld1	St6galnac3
Pld2	Rpl10a	Pld2	Stag1
Ppap2a	Rpl18	Ppap2a	Stam
Ptdss1	Rpl26	Ptdss1	Sufu
Lypla2	Rpl27	Lypla2	Suv420h2
Pla2g10	Rpl37a	Pla2g10	Sv2b
Pla2g2e	Rpl6	Pla2g2e	Synj2
Pla2g2f	Rpl7	Pla2g2f	Tacr2
Ptdss2	Rpl9	Ptdss2	Tacr3
Ept1	Rps14	Ept1	Tbxa2r
Agpat3	Rps16	Agpat3	Tha1
Ppap2c	Rps17	Ppap2c	Tiam2
Pla2g6	Rps18	Pla2g6	Tln2
Agpat1	Rps19	Agpat1	Tnfrsf19
Dgke	Gm10119 /// Gm9000 /// Rps3a	Dgke	Tpm3
Pla2g12a	Rps4x	Pla2g12a	Traf2
2310004I24Rik	Rps5	2310004I24Rik	Tubb6
Crls1	Rps6	Crls1	Tyk2
Taz	Rps7	Taz	Ube2o
Mboat2	Rpl13a	Mboat2	Ube2u
Agpat2	Uba52	Agpat2	Uck2
Ppap2b	Rpl8	Ppap2b	Upf2
Agpat4	Rps3	Agpat4	Vasp
Pcyt2	Rps11	Pcyt2	Vcam1
Pla2g12b	Rpl3l	Pla2g12b	Vcl
Pgs1	Rpl35	Pgs1	Vdac1
Cds1	Rpl11	Cds1	Vnn1
Etnk1	Rps10	Etnk1	Vps37b
Mboat7	Rpl14	Mboat7	Wwp1
Pla2g4d	Rplp2	Pla2g4d
Lpcat4	LOC100503815 /// LOC100504784 /// Rpl39	Lpcat4
Cept1	Rpl38	Cept1
Agpat6	Rpl4	Agpat6
Dgkz	Rpl22l1	Dgkz
Dgkg	Rpl39l	Dgkg
Dgkq	Rps9	Dgkq
Cds2	Rsl24d1	Cds2
Pla2g15	Rpl17	Pla2g15
Chpt1	Hspa5	Chpt1
Etnk2	Srprb	Etnk2
Gpat2	Srp9	Gpat2
Dgkb	Sec61a1	Dgkb
Mboat1	Sec61a2	Mboat1
Lclat1	Sec61b	Lclat1
Lpgat1	Srp19	Lpgat1
Dgkd	Immp1l	Dgkd
Agpat9	Spcs2	Agpat9
Pcyt1b	Srp72	Pcyt1b
Pla2g3	Spcs1	Pla2g3
Lpcat2	Oxa1l	Lpcat2
Dgki	Sec62	Dgki
Pisd	Spcs3	Pisd
Pla2g4e	Immp2l	Pla2g4e
Gpd1l	Akt1	Gpd1l
Dgkh	Akt2	Dgkh
Plb1	Atf4	Plb1
Pafah1b1	Bdnf	Pafah1b1
Pafah1b2	Cacna1a	Pafah1b2
Pafah1b3	Cacna1b	Pafah1b3
Enpp2	Cacna1c	Enpp2
Pla2g7	Cacna1d	Pla2g7
Pafah2	Cacna1e	Pafah2
	Cacna1g	Agps
Agps	Cacna1s	Enpp6
Enpp6	Cacna2d1	Dhfr
Dhfr	Cacna2d3	Ftcd
Ftcd	Cacnb1	Gart
Gart	Cacnb2	Mthfd2
Mthfd2	Cacnb3	Mthfr
Mthfr	Cacnb4	Mtfmt
Mtfmt	Cacng1	Aldh1l1
Aldh1l1	Cacng2	Mthfs
Mthfs	Casp3	Atic
Atic	Cd14	Mthfd1
Mthfd1	Cdc25b	Aldh1l2
Aldh1l2	Cdc42	Mthfd2l
Mthfd2l	Chuk	Bcat1
Bcat1	Crk	Bcat2
Bcat2	Daxx	Enpp1
Enpp1	Gadd45a	Vnn1
Vnn1	Ddit3	Ppcdc
Ppcdc	Dusp2	Coasy
Coasy	Egf	Pank2
Pank2	Elk1	Pank1
Pank1	Elk4	Ppcs
Ppcs	Mecom	Enpp3
Enpp3	Fas	Pank3
Pank3	Fgf1	Pank4
Pank4	Fgf2	Csnk2a1
Csnk2a1	Fgf3	Csnk2a2
Csnk2a2	Fgf4	Csnk2b
Csnk2b	Fgf5	Emg1
Emg1	Fgf6	Eif6
Eif6	Fgf7	Rasl2-9-ps
Rasl2-9-ps	Fgf8	Tcof1
Tcof1	Fgf9	Cirh1a
Cirh1a	Fgfr1	Xrn1
Xrn1	Fgfr3	Xrn2
Xrn2	Fgfr4	Imp4
Imp4	Fos	Gnl3
Gnl3	Gna12	Nhp2
Nhp2	Gng12	Nxf1
Nxf1	Grb2	Rpp30
Rpp30	Nr4a1	Nop58
Nop58	Hras1	Nxt1
Nxt1	Hspa8	Spata5
Spata5	Hspa1l	Rcl1
Rcl1	Hspb1	Pop4
Pop4	Hspa1b	Nop10
Nop10	Hspa2	Sbds
Sbds	Ikbkg	Rexo1
Rexo1	Il1a	Riok2
Riok2	Il1b	Nop56
Nop56	Il1r1	Nvl
Nvl	Il1r2	Nob1
Nob1	Jun	Pop1
Pop1	Kras	Mphosph10
Mphosph10	Stmn1	Gar1
Gar1	Mapkapk2	Rbm28
Rbm28	Mapkapk5	Gtpbp4
Gtpbp4	Max	2810432D09Rik
2810432D09Rik	Mef2c	Riok1
Riok1	Mknk1	Wdr43
Wdr43	Mknk2	Utp14a
Utp14a	Mos	Wdr75
Wdr75	Mras	Pop7
Pop7	Mapt	Rrp7a
Rrp7a	Myc	1700009N14Rik
1700009N14Rik	Gadd45b	Nxf2
Nxf2	Nf1	Nmd3
Nmd3	Nfatc2	Nat10
Nat10	Nfkb1	Mdn1
Mdn1	Nfkb2	Eftud1
Eftud1	Ngf	Imp3
Imp3	Nlk	Rpp25
Rpp25	Nras	Xpo1
Xpo1	Ntf3	Rexo2
Rexo2	Ntrk1	Utp15
Utp15	Ntrk2	Taf9
Taf9	5530400B01Rik /// Dusp8	Pwp2
Pwp2	Pak1	Pop5
Pop5	Pdgfa	Nxf7
Nxf7	Pdgfb	Utp14b
Utp14b	Pdgfra	Rpp40
Rpp40	Pdgfrb	Tbl3
Tbl3	Prkaca	Bms1
Bms1	Prkacb	Utp6
Utp6	Prkca	Utp18
Utp18	Prkcb	Heatr1
Heatr1	Prkcc	Lsg1
Lsg1	Pla2g1b	Wdr36
Wdr36	Pla2g2a	Nol6
Nol6	Pla2g2c	Gnl2
Gnl2	Pla2g2d	Nxt2
Nxt2	Pla2g4a	Gnl3l
Gnl3l	Pla2g5	Dkc1
Dkc1	Ppm1a	Nxf3
Nxf3	Ppm1b	Wdr3
Wdr3	Ppp3ca	Eef1a1
Eef1a1	Ppp3cb	Eef1a2
Eef1a2	Ppp3cc	Eif1a
Eif1a	Ppp3r1	Eif2s1
Eif2s1	Ppp3r2	Eif2b4
Eif2b4	Ppp5c	Eif3a
Eif3a	Mapk11	Eif4a1
Eif4a1	Mapk8ip1	Eif4a2
Eif4a2	Prkx	Eif4e
Eif4e	Dusp1	Eif4ebp1
Eif4ebp1	Ptpn5	Eif4g2
Eif4g2	Ptprr	Kpnb1
Kpnb1	Rac1	Eif3e
Eif3e	Rac2	Magoh
Magoh	Rasgrp2	Nup50
Nup50	Rasgrf1	Nup62
Nup62	Rasgrf2	Pabpc1
Pabpc1	Rasgrp1	Pabpc2
Pabpc2	Rela	Pnn
Pnn	Relb	Nup88
Nup88	Rras	Ranbp2
Ranbp2	Sos1	Rangap1
Rangap1	Sos2	Upf1
Upf1	Srf	Rnps1
Rnps1	Tgfb1	Smn1
Smn1	Tgfb2	Sumo3
Sumo3	Tgfb3	Strap
Strap	Tgfbr1	Tacc3
Tacc3	Tgfbr2	Thoc4
Thoc4	Tnf	Ube2i
Ube2i	Tnfrsf1a	Sumo1
Sumo1	Traf2	Eif2s3x /// Gm2223
Eif2s3x /// Gm2223	Traf6	Eif2s3y
Eif2s3y	Trp53	Eif4e2
Eif4e2	Akt3	Prmt5
Prmt5	Gadd45g	Eif3b
Eif3b	Map2k5	Srrm1
Srrm1	Mapk7	Eif3g
Eif3g	Map2k1	Bat1a
Bat1a	Map2k2	Ddx20
Ddx20	Map2k3	Nup210
Nup210	Map2k4	Eif3i
Eif3i	Map2k6	Eif3d
Eif3d	Map2k7	Acin1
Acin1	Map3k1	Eif3c
Eif3c	Map3k2	Phax
Phax	Map3k3	Nup160
Nup160	Map3k4	Rbm8a
Rbm8a	Map3k5	Snupn
Snupn	Map3k7	Eif3f
Eif3f	Map3k8	Eif1ax
Eif1ax	Map4k1	Magohb
Magohb	Map4k2	Sip1
Sip1	Mapk10	Rae1
Rae1	Mapk13	Upf3a
Upf3a	Mapk14	Rpp14
Rpp14	Mapk3	Eif2s2
Eif2s2	Mapk9	Pabpc6
Pabpc6	Pla2g10	Rpp21
Rpp21	Map4k4	Ncbp2
Ncbp2	Ecsit	Upf3b
Upf3b	Pla2g2e	Eif3h
Eif3h	Pla2g2f	Elac2
Elac2	Mapk12	Eif1b
Eif1b	Mapk8ip3	Nup35
Nup35	Pla2g6	Gemin7
Gemin7	Map3k6	Nup43
Nup43	Cacng3	Trnt1
Trnt1	Cacng4	Nup205
Nup205	Cacng6	4933411G06Rik
4933411G06Rik	Cacna1f	Nup93
Nup93	Stk3	Nupl1
Nupl1	Cacna2d2	Seh1l
Seh1l	Cacna1h	Xpo5
Xpo5	Stk4	Tmem48
Tmem48	Mapk8ip2	Xpot
Xpot	B230120H23Rik	Thoc3
Thoc3	Pla2g12a	Eif4b
Eif4b	Tab1	Senp2
Senp2	Dusp6	Nup210l
Nup210l	Tab2	Wibg
Wibg	Flnc	Pabpc5
Pabpc5	Pla2g12b	Nup107
Nup107	2010110P09Rik	Thoc5
Thoc5	Dusp3	Pom121
Pom121	Nfatc4	Eif2b3
Eif2b3	Dusp9	Tpr
Tpr	Rapgef2	Sec13
Sec13	Pla2g4d	Elac1
Elac1	Ntf5	Tgs1
Tgs1	Cacng7	Nup155
Nup155	Cacng8	Sumo2
Sumo2	Mapkapk3	Casc3
Casc3	Arrb1	Pom121l2
Pom121l2	Braf	Eif4g1
Eif4g1	Rap1a	Eif2b1
Eif2b1	Raf1	Gemin5
Gemin5	Rasa2	Eif2b2
Eif2b2	Cacng5	Eif5
Eif5	Rac3	Nup153
Nup153	Flna	Paip1
Paip1	Hspa1a	Aaas
Aaas	Rap1b	Eif2b5
Eif2b5	Arrb2	Thoc1
Thoc1	Taok1	Eif5b
Eif5b	Rasa1	Nup188
Nup188	Pak2	Nup214
Nup214	Map4k3	Pabpc4
Pabpc4	Rasgrp4	Eif4g3
Eif4g3	Dusp7	Nupl2
Nupl2	Pla2g3	4930444G20Rik /// AF366264
4930444G20Rik /// AF366264	Rasgrp3	Nup133
Nup133	Dusp5	Gemin8
Gemin8	Flnb	Pabpc4l
Pabpc4l	Dusp4	Nup54
Nup54	Cacna2d4	Nup98
Nup98	Pla2g4e	Upf2
Upf2	Abl1	Thoc2
Thoc2	Abl2	Pabpc1l
Pabpc1l	Araf	Thoc6
Thoc6	Areg	Ncbp1
Ncbp1	Bad	Nup85
Nup85	Btc	Gspt1
Gspt1	Camk2a	Gspt2
Gspt2	Camk2b	Msi1
Msi1	Camk2g	Papola
Papola	Cbl	Ppp2ca
Ppp2ca	Cdkn1a	Ppp2cb
Ppp2cb	Cdkn1b	Ppp2r3d
Ppp2r3d	Eif4ebp1	Ppp2r5d
Ppp2r5d	Erbb2	Rngtt
Rngtt	Erbb3	Ppp2r5c
Ppp2r5c	Erbb4	Ppp2r5e
Ppp2r5e	Ereg	Cpsf2
Cpsf2	Ptk2	Ppp2r1a
Ppp2r1a	Gab1	Ppp2r2d
Ppp2r2d	Hbegf	Cpsf4
Cpsf4	Nck1	Pabpn1
Pabpn1	Nck2	Cpsf3
Cpsf3	Nrg3	Hbs1l
Hbs1l	Pak3	Papolb
Papolb	Pik3ca	Ppp2r3c
Ppp2r3c	Pik3cd	Fip1l1
Fip1l1	Pik3r1	Cstf1
Cstf1	Pik3r2	Rnmt
Rnmt	Pik3r3	Sympk
Sympk	Plcg1	Nudt21
Nudt21	Shc1	Dazap1
Dazap1	Shc3	Ppp2r2a
Ppp2r2a	Src	Ppp2r2b
Ppp2r2b	Stat5a	Ppp2r1b
Ppp2r1b	Stat5b	Pcf11
Pcf11	Tgfa	Msi2
Msi2	Pik3cg	Cstf2t
Cstf2t	Gsk3b	Cpsf1
Cpsf1	Mtor	Clp1
Clp1	Pak4	Smg6
Smg6	Pik3cb	Pelo
Pelo	Nrg4	Papolg
Cstf2	Camk2d	Etf1
Papolg	Nrg1	Ppp2r5b
Etf1	Pak6	Smg7
Ppp2r5b	Shc2	Ppp2r5a
Smg7	Plcg2	Cstf3
Ppp2r5a	Pak7	Smg5
Cstf3	Pik3r5	Smg1
Smg5	Nrg2	Ppp2r3a
Smg1	Chrna7	Cpsf7
Ppp2r3a	Adcy7	Ppp2r2c
Cpsf7	Adcy8	Pabpn1l
Ppp2r2c	Adcy9	Cpsf6
Pabpn1l	Adora2a	Aqr
Cpsf6	Adora2b	Dhx15
Aqr	Adra1b	Ddx5
Dhx15	Adra1a	Srsf10
Ddx5	Adrb1	Hnrnpc
Srsf10	Adrb2	Hnrnpa1
Hnrnpc	Adrb3	Hnrnpk
Hnrnpa1	Agtr1a	Hspa8
Hnrnpk	Agtr1b	Hspa1l
Hspa8	Slc25a4	Hspa1b
Hspa1l	Slc25a5	Hspa2
Hspa1b	Atp2a1	Rbmx
Hspa2	Atp2a2	Sf3a2
Rbmx	Atp2b2	Sart1
Sf3a2	Bdkrb1	Srsf2
Sart1	Bdkrb2	Srsf3
Srsf2	Bst1	Srsf5
Srsf3	Camk4	Eftud2
Srsf5	Cckar	Snrpc
Eftud2	Cckbr	Snrnp70
Snrpc	Cd38	Snrpb
Snrnp70	Chrm1	Snrpb2
Snrpb	Chrm3	Snrpe
Snrpb2	Drd1a	U2af2
Snrpe	Ednra	Pcbp1
U2af2	Ednrb	Lsm2
Pcbp1	F2r	Cherp
Lsm2	Gna11	Prpf19
Cherp	Gna14	Usp39
Prpf19	Gna15	Lsm4
Usp39	Gnal	Hnrnpu
Lsm4	Gnaq	Plrg1
Hnrnpu	Gnas	Prpf40b
Plrg1	Grin1	LOC631302 /// Pqbp1
Prpf40b	Grin2a	Ppie
LOC631302 /// Pqbp1	Grin2c	Tcerg1
Ppie	Grin2d	Prpf40a
Tcerg1	Grm1	Srsf4
Prpf40a	Grpr	Isy1
Srsf4	Hrh1	Wbp11
Isy1	Hrh2	Dhx38
Wbp11	Htr2b	0610009D07Rik
Dhx38	Htr2c	Cwc15
0610009D07Rik	Htr4	Sf3b5
Cwc15	Htr5a	Snw1
Sf3b5	Htr5b	Zmat2
Snw1	Htr6	Snrnp40
Zmat2	Htr7	Snrnp27
Snrnp40	Itpr1	Ctnnbl1
Snrnp27	Itpr2	Rbm22
Ctnnbl1	Itpr3	Crnkl1
Rbm22	Lhcgr	Prpf38b
Crnkl1	Nos1	Rbm25
Prpf38b	Nos2	Prpf18
Rbm25	Nos3	Snrpd3
Prpf18	Ntsr1	Xab2
Snrpd3	Oxtr	Sf3a1
Xab2	P2rx1	Lsm3
Sf3a1	P2rx4	2610101N10Rik
Lsm3	P2rx7	Puf60
2610101N10Rik	P2rx6	Srsf6
Puf60	Pde1a	Snrpg
Srsf6	Pde1b	Bcas2
Snrpg	Pde1c	Phf5a
Bcas2	Phka1	Syf2
Phf5a	Phkg1	Ppil1
Syf2	Plcb1	Prpf6
Ppil1	Plcb2	Snrpa1
Prpf6	Plcb3	Prpf31
Snrpa1	Plcb4	Dhx16
Prpf31	Plcd1	Snrpf
Dhx16	Plcd4	Prpf4
Snrpf	Pln	Prpf3
Prpf4	Ptafr	Cdc5l
Prpf3	Ptger1	Cdc40
Cdc5l	Ptger3	Ddx42
Cdc40	Ptgfr	Ccdc12
Ddx42	Ryr1	Ddx23
Ccdc12	Ryr2	Sf3a3
Ddx23	Ryr3	Smndc1
Sf3a3	Slc8a1	Naa38
Smndc1	Tacr1	Hnrnpm
Naa38	Tacr2	Rbm17
Hnrnpm	Tacr3	Lsm6
Rbm17	Tbxa2r	Sf3b1
Lsm6	Tnnc1	Tra2a
Sf3b1	Tnnc2	Sf3b3
Tra2a	Trhr	Snrpd2
Sf3b3	Trpc1	Sf3b4
Snrpd2	Vdac1	Srsf9
Sf3b4	Vdac2	U2af1
Srsf9	Vdac3	Srsf1
U2af1	Avpr1b	Prpf8
Srsf1	Atp2a3	Slu7
Prpf8	Avpr1a	Hspa1a
Slu7	Ltb4r2	Ddx46
Hspa1a	Cysltr1	Dhx8
Ddx46	Atp2b1	Srsf7
Dhx8	Phkg2	Hnrnpa3
Srsf7	Cysltr2	Prpf38a
Hnrnpa3	Calml3	Sf3b2
Prpf38a	Plcd3	Snrnp200
Sf3b2	Slc25a31	Ifng
Snrnp200	Plce1	Psmb9
Ifng	Calm4	Psmb8
Psmb9	P2rx5	Psmd7
Psmb8	Phkb	Psma2
Psmd7	Adcy4	Psma3
Psma2	Adcy3	Psmb1
Psma3	Mylk	Psmb10
Psmb1	Grm5	Psmb4
Psmb10	Phka2	Psmb5
Psmb4	Slc8a2	Psmb6
Psmb5	Slc8a3	Psmb7
Psmb6	Plcz1	Psmc1
Psmb7	Adcy2	Psmc2
Psmc1	P2rx3	Psmc3
Psmc2	Itpka	Psmc5
Psmc3	P2rx2	Psmd4
Psmc5	Itpkb	Psme1
Psmd4	Atp2b3	Psme2
Psme1	Atp2b4	Psme3
Psme2	Adcy1	Shfm1
Psme3	Acvr1	Psmd2
Shfm1	Acvr2a	Psmd3
Psmd2	Acvr2b	Psmc4
Psmd3	Amh	Psmd13
Psmc4	Cxcr5	Psma1
Psmd13	Bmp2	Psma4
Psma1	Bmp7	Psma5
Psma4	Bmpr1a	Psma6
Psma5	Bmpr1b	Psma7
Psma6	Bmpr2	Psmb2
Psma7	Ccr6	Psmb3
Psmb2	Cxcr2	Psmd8
Psmb3	Cxcr3	Psmd14
Psmd8	Cxcr4	Psmd6
Psmd14	Ccr1	Pomp
Psmd6	Ccr9	Psmd12
Pomp	Ccr3	Psmc6
Psmd12	Ccr2	Psmd11
Psmc6	Ccr4	Psmd1
Psmd11	Ccr5	Psma8
Psmd1	Ccr7	Psmb11
Psma8	Ccr8	Psme4
Psmb11	Cxcr7	Psmf1
Psme4	Cntfr	Acadl
Psmf1	Csf2ra /// LOC100045292	Acadm
Acadl	Csf2rb2	Acox1
Acadm	Ctf1	Adipoq
Acox1	Cx3cr1	Fabp4
Adipoq	Eda	Apoa1
Fabp4	Epor	Apoa2
Apoa1	Figf	Apoc3
Apoa2	Flt1	Aqp7
Apoc3	Flt3	Fabp7
Aqp7	Flt4	Cd36
Fabp7	Gdf5	Cpt1a
Cd36	Ghr	Cpt2
Cpt1a	Cxcl1	Cyp4a14
Cpt2	Hgf	Cyp8b1
Cyp4a14	Ifna1	Dbi
Cyp8b1	Ifna2	Fabp3
Dbi	Ifna4	Fabp2
Fabp3	Ifna5	Fabp1
Fabp2	Ifna9	Acsl1
Fabp1	Ifnab	Gk2
Acsl1	Ifnar1	Gyk
Gk2	Ifnar2	Hmgcs2
Gyk	Ifnb1	Ilk
Hmgcs2	Ifng	Fabp6
Ilk	Il10	Fabp5
Fabp6	Il11	Lpl
Fabp5	Il12a	Me1
Lpl	Il12b	Pck1
Me1	Il12rb1	Pdpk1
Pck1	Il12rb2	Pltp
Pdpk1	Il13	Ppara
Pltp	Il15	Ppard
Ppara	Il17a	Pparg
Ppard	Il17ra	Rxra
Pparg	Il18	Rxrb
Rxra	Il1rap	Rxrg
Rxrb	Il2	Scd1
Rxrg	Il3	Scd2
Scd1	Il4	Scp2
Scd2	Il5	Sorbs1
Scp2	Il6	Ubc
Sorbs1	Il7	Ucp1
Ubc	Il9	Nr1h3
Ucp1	Inhba	Slc27a1
Nr1h3	Inhbb	Slc27a2
Slc27a1	Inhbc	Slc27a5
Slc27a2	Inhbe	Slc27a4
Slc27a5	Kdr	Scd3
Slc27a4	Kit	Acsl4
Scd3	Lep	Fads2
Acsl4	Lif	Angptl4
Fads2	Xcl1	Apoa5
Angptl4	Lta	Acsl3
Apoa5	Ltbr	Pck2
Acsl3	Met	Cpt1c
Pck2	Cxcl9	Acox3
Cpt1c	Mpl	Mmp1a
Acox3	Tnfrsf11b	Mmp1b
Mmp1a	Osm	Acox2
Mmp1b	Prl	Cyp27a1
Acox2	Ccl1	Olr1
Cyp27a1	Ccl20	Acaa1a
Olr1	Ccl22	Acsl6
Acaa1a	Ccl25	Acaa1b
Acsl6	Ccl27a /// Ccl27b	Cyp4a12a
Acaa1b	Ccl3	Acsbg2
Cyp4a12a	Ccl4	Acsl5
Acsbg2	Ccl5	Cyp4a31
Acsl5	Ccl6	Apaf1
Cyp4a31	Ccl7	Atm
Apaf1	Ccl9	Bax
Atm	Cxcl2	Bid
Bax	Cxcl5	Casp3
Bid	Cx3cl1	Casp8
Casp3	Tnfrsf10b	Casp9
Casp8	Tnfrsf11a	Ccnb2
Casp9	Tnfrsf17	Ccnd1
Ccnb2	Tnfrsf18	Ccnd2
Ccnd1	Tnfrsf1b	Ccnd3
Ccnd2	Cd40	Ccne1
Ccnd3	Cd27	Ccne2
Ccne1	Cd70	Ccng1
Ccne2	Tpo	Ccng2
Ccng1	Vegfa	Cd82
Ccng2	Vegfb	Cdk1
Cd82	Vegfc	Cdk2
Cdk1	Xcr1	Cdk6
Cdk2	Tnfsf13b	Cdkn1a
Cdk6	Tnfrsf12a	Cdkn2a
Cdkn1a	Tnfrsf19	Chek1
Cdkn2a	Il17rb	Cycs
Chek1	Tslp	Cyct
Cycs	Pdgfc	Gadd45a
Cyct	Il17b	Ei24
Gadd45a	Ccl24	Fas
Ei24	Clcf1	Igf1
Fas	Pf4	Igfbp3
Igf1	Ccl28	Mdm2
Igfbp3	Ppbp	Mdm4
Mdm2	Crlf2	Gadd45b
Mdm4	Tnfrsf13b	Serpine1
Gadd45b	Pdgfd	Siah1a
Serpine1	Tnfrsf13c	Serpinb5
Siah1a	Cxcr6	Thbs1
Serpinb5	Tnfrsf25	Trp53
Thbs1	Tnfrsf21	Trp73
Trp53	9130219A07Rik	Tsc2
Trp73	Tnfrsf14	Zmat3
Tsc2	Relt	Gadd45g
Zmat3	Adcy6	Rfwd2
Gadd45g	Rhoa	Gtse1
Rfwd2	Bcar1	Chek2
Gtse1	Fgr	Ppm1d
Chek2	Gnai1	Sfn
Ppm1d	Gnai2	Lrdd
Sfn	Gnai3	Pmaip1
Lrdd	Gnb1	Perp
Pmaip1	Gnb2	Shisa5
Perp	Gnb3	Rprm
Shisa5	Gnb4	Rchy1
Rprm	Gnb5	Steap3
Rchy1	Gngt1	Sesn3
Steap3	Gng10	Bai1
Sesn3	Gng2	Ddb2
Bai1	Gng3	Sesn1
Ddb2	Gng4	Bbc3
Sesn1	Gng7	Ccnb3
Bbc3	Gng8	Sesn2
Ccnb3	Gngt2	Atr
Sesn2	Grk4	LOC100504316 /// LOC100505168
Atr	Grk5	Aire
LOC100504316 /// LOC100505168	Hck	Birc3
Aire	Itk	Birc2
Birc3	Jak2	Xiap
Birc2	Jak3	Brca1
Xiap	Ncf1	Btrc
Brca1	Nfkbia	Cbl
Btrc	Nfkbib	Socs3
Cbl	Prkcd	Socs1
Socs3	Prkcz	Ddb1
Socs1	Pxn	Trip12
Ddb1	Rock1	Herc2
Trip12	Rock2	Itch
Herc2	Stat1	Anapc1
Itch	Stat2	Mgrn1
Anapc1	Stat3	Mid1
Mgrn1	Tiam1	Pias2
Mid1	Vav1	Nedd4
Pias2	Vav2	Pml
Nedd4	Was	Skp1a
Pml	Tiam2	Traf6
Skp1a	Grk1	Ube2m
Traf6	Grk6	Ube2e3
Ube2m	Foxo3	Uba3
Ube2e3	Vav3	Uba1
Uba3	Gng13	Ube1y1
Uba1	Gng11	Ube2a
Ube1y1	Pard3	Ube2b
Ube2a	Dock2	Ube2g2
Ube2b	Adrbk1	Ube2h
Ube2g2	Elmo1	Ube3a
Ube2h	Adcy5	Vhl
Ube3a	Prex1	Map3k1
Vhl	Gsk3a	Cul3
Map3k1	Atm	Cul1
Cul3	Bub1	Skp2
Cul1	Bub3	Fbxw7
Skp2	Ccna1	Keap1
Fbxw7	Ccna2	Park2
Keap1	Ccnb2	Uba2
Park2	Ccnd1	Anapc4
Uba2	Ccnd2	Cdc23
Anapc4	Ccnd3	Ube2k
Cdc23	Ccne1	Ube2j1
Ube2k	Ccne2	Anapc7
Ube2j1	Cdc25a	Fzr1
Anapc7	Cdc25c	Stub1
Fzr1	Cdk1	Rbx1
Stub1	Cdc45	Sae1
Rbx1	Cdc7	Pias1
Sae1	Cdk2	Ube2d2
Pias1	Cdk6	Ube2l6
Ube2d2	Cdk7	Pias4
Ube2l6	Cdkn1c	Anapc5
Pias4	Cdkn2a	Huwe1
Anapc5	Cdkn2b	Ube4b
Huwe1	Cdkn2c	Ppil2
Ube4b	Cdkn2d /// Gm4694	Ube2d3
Ppil2	Crebbp	Anapc11
Ube2d3	Smc3	Smurf2
Anapc11	E2f1	Cdc26
Smurf2	E2f3	Cul7
Cdc26	E2f5	Ube2w
Cul7	Hdac2	Wwp2
Ube2w	Mad1l1	Fancl
Wwp2	7120426M23Rik	Ube2g1
Fancl	Smad3	Herc4
Ube2g1	Smad4	Klhl13
Herc4	Mcm3	Ube2r2
Klhl13	Mcm2	Tceb2
Ube2r2	Mcm4	Ube2f
Tceb2	Mcm5	Tceb1
Ube2f	Mcm6	Ube2c
Tceb1	Mcm7	Trim37
Ube2c	Anapc1	Anapc10
Trim37	Mdm2	Anapc13
Anapc10	Orc1	Rhobtb1
Anapc13	Orc2	Trim32
Rhobtb1	Pcna	Cdc16
Trim32	Plk1	Ube2q1
Cdc16	Prkdc	Ubr5
Ube2q1	Rad21	Cul2
Ubr5	Rb1	Ercc8
Cul2	Rbl1	Cul4b
Ercc8	Rbl2	Herc3
Cul4b	Stag1	Syvn1
Herc3	Stag2	Cdh29 /// Uba7
Syvn1	Skp1a	Cul5
Cdh29 /// Uba7	Tfdp1	Smurf1
Cul5	Ttk	Ube2ql1
Smurf1	Wee1	Ube2s
Ube2ql1	Ywhae	Cblc
Ube2s	Ywhag	Nedd4l
Cblc	Ywhah	Anapc2
Nedd4l	LOC100503129 /// Ywhaq	Cul4a
Anapc2	LOC100505062 /// Ywhaz	Ube3c
Cul4a	Zbtb17	Fbxw11
Ube3c	Cdc6	Nhlrc1
Fbxw11	Smc1a	Fbxo4
Nhlrc1	Orc4	Wwp1
Fbxo4	Orc5	Cdc20
Wwp1	Cul1	Ube2q2
Cdc20	Dbf4	Ube3b
Ube2q2	Skp2	Ube2j2
Ube3b	Pttg1	Ubox5
Ube2j2	Orc3	Ube4a
Ubox5	Chek2	Cblb
Ube4a	Anapc4	Ube2d1
Cblb	Cdc23	Cdc34
Ube2d1	Ywhab	Cdc27
Cdc34	Sfn	Ube2o
Cdc27	Anapc7	Pias3
Ube2o	Fzr1	Fbxo2
Pias3	Rbx1	Uba6
Fbxo2	Orc6	Fbxw8
Uba6	Anapc5	Herc1
Fbxw8	Cdc26	Klhl9
Herc1	Ccnh	Rhobtb2
Klhl9	Cdc16	Ube2z
Rhobtb2	Mad2l2	Ube2u
Ube2z	Anapc2	Actb
Ube2u	E2f4	Actg1
Actb	Espl1	Atp6v1a
Actg1	Cdc20	Atp6v1b2
Atp6v1a	Smc1b	Atp6v0d1
Atp6v1b2	Ccnb3	Atp6v1e1
Atp6v0d1	Tfdp2	Atp6v0e
Atp6v1e1	Cdc27	Atp6v0a1
Atp6v0e	Cdc14b	Atp6v0c
Atp6v0a1	Cdc14a	Calr
Atp6v0c	E2f2	Canx
Calr	Atr	Cd14
Canx	LOC100504316 /// LOC100505168	Coro1a
Cd14	Pkmyt1	Comp
Coro1a	Wee2	Ctsl
Comp	Hdac1	Ctss
Ctsl	Btrc	Cyba
Ctss	Cpeb1	Cybb
Cyba	Igf1	Dync1h1
Cybb	Ins1	Dync1i1
Dync1h1	Ins2	Dync1i2
Dync1i1	Pgr	Fcgr1
Dync1i2	Ppp1ca	Fcgr2b
Fcgr1	Ppp1cb	Fcgr3
Fcgr2b	Ppp1cc	H2-Aa
Fcgr3	Ppp2ca	H2-Ab1
H2-Aa	Ppp2cb	H2-Bl
H2-Ab1	Slk	H2-D1
H2-Bl	Aurka	H2-Eb1
H2-D1	Ppp2r5d	H2-K1
H2-Eb1	Ppp2r5c	H2-M10.1
H2-K1	Ppp2r5e	H2-M3
H2-M10.1	Stag3	H2-M9
H2-M3	Ppp2r1a	H2-DMa
H2-M9	Rec8	H2-DMb2
H2-DMa	Fbxo5	H2-Oa
H2-DMb2	Spdya	H2-Ob
H2-Oa	Sgol1	H2-Q10
H2-Ob	Ppp2r1b	H2-T24
H2-Q10	Spdyb	Hgs
H2-T24	Fbxo43	Itga2
Hgs	Fbxw11	Itga5
Itga2	Ppp2r5b	Itgam
Itga5	Ppp2r5a	Itgav
Itgam	Ap2a1	Itgb1
Itgav	Ap2a2	Itgb2
Itgb1	Ap2m1	Itgb2l
Itgb2	Arf6	Itgb3
Itgb2l	Cav1	Itgb5
Itgb3	Cav2	Lamp1
Itgb5	Cav3	Lamp2
Lamp1	Clta	M6pr
Lamp2	Dab2	Marco
M6pr	Dnm1	Mbl1
Marco	Dnm2	Mbl2
Mbl1	Ehd1	Mpo
Mbl2	Epn1	Mrc1
Mpo	Epn2	Mrc2
Mrc1	Eps15	Ncf1
Mrc2	Folr1	Ncf2
Ncf1	Folr2	Ncf4
Ncf2	H2-Bl	Nos1
Ncf4	H2-D1	Pla2r1
Nos1	H2-K1	Rab5b
Pla2r1	H2-M10.1	Rab5c
Rab5b	H2-M3	Rab7
Rab5c	H2-M9	Rac1
Rab7	H2-Q10	Msr1
Rac1	H2-T24	Sec22b
Msr1	Hgs	Sftpa1
Sec22b	Itch	Sftpd
Sftpa1	Ldlr	Scarb1
Sftpd	Smad6	Tap1
Scarb1	Smad7	Tap2
Tap1	Nedd4	Thbs2
Tap2	Pdcd6ip	Thbs3
Thbs2	Pip5k1c	Thbs4
Thbs3	Pip5k1b	Atp6v0a2
Thbs4	Pip5k1a	Tlr4
Atp6v0a2	Prkci	Tlr6
Tlr4	Pld1	Tuba1a
Tlr6	Pld2	Tuba4a
Tuba1a	Pml	Tubb2a
Tuba4a	Rab11b	Tubb3
Tubb2a	Rab22a	Tubb4
Tubb3	Rab4a	Tubb5
Tubb4	Rab5b	Vamp3
Tubb5	Rab5c	Tlr2
Vamp3	Rab7	Tcirg1
Tlr2	Ret	C1ra
Tcirg1	Sh3gl2	Stx7
C1ra	Sh3gl1	Sec61a1
Stx7	Sh3gl3	Tuba8
Sec61a1	Vps4b	Atp6ap1
Tuba8	Stam	Clec7a
Atp6ap1	Tsg101	Sec61a2
Clec7a	Vps45	Atp6v1f
Sec61a2	Git2	Sec61b
Atp6v1f	Snf8	Atp6v1g2
Sec61b	Vps25	Atp6v1g1
Atp6v1g2	Rab11fip5	Atp6v1c1
Atp6v1g1	Vps37a	Tubb6
Atp6v1c1	Rab11a	Atp6v1c2
Tubb6	Rabep1	Cd209f
Atp6v1c2	Sh3glb1	Cd209b
Cd209f	Pard6a	Cd209g
Cd209b	Ehd3	Stx18
Cd209g	Sh3kbp1	Colec11
Stx18	Pard6b	Tubb2b
Colec11	Folr4	Atp6v1d
Tubb2b	Vta1	Atp6v1e2
Atp6v1d	Arfgap3	Stx12
Atp6v1e2	Smurf2	Atp6v1h
Stx12	Chmp4c	Dync2h1
Atp6v1h	Vps24	Atp6v1b1
Dync2h1	Vps28	Atp6v0b
Atp6v1b1	Chmp1b	Atp6v0a4
Atp6v0b	Cltc	Colec12
Atp6v0a4	Rnf41	Cd209c
Colec12	Chmp2b	Cd209d
Cd209c	Chmp2a	Cd209e
Cd209d	Arap1	Cd209a
Cd209e	Smap2	Eea1
Cd209a	Vps36	5430435G22Rik
Eea1	Ap2b1	Tubb2c
5430435G22Rik	Epn3	Dync1li2
Tubb2c	Fam125b	Dync1li1
Dync1li2	Dnajc6	Atp6v0d2
Dync1li1	Fam125a	Fcgr4
Atp6v0d2	Psd	Rab5a
Fcgr4	Cltb	Rilp
Rab5a	Rab11fip2	Tubb1
Rilp	Chmp4b	B2m
Tubb1	Rab11fip1	Ciita
B2m	Smurf1	Cd4
Ciita	Chmp5	Cd8a
Cd4	Arfgap2	Cd8b1
Cd8a	Zfyve20	Creb1
Cd8b1	Acap2	Ctsb
Creb1	Usp8	Pdia3
Ctsb	Pard6g	Hspa5
Pdia3	Smap1	Hsp90ab1
Hspa5	Ehd4	Hsp90aa1
Hsp90ab1	Dnm3	Hspa4
Hsp90aa1	Rab31	Cd74
Hspa4	Arap3	Klrc1
Cd74	Vps37c	Klrc2
Klrc1	Wwp1	Klrd1
Klrc2	Vps4a	Nfya
Klrd1	Acap3	Nfyb
Nfya	Vps37d	Nfyc
Nfyb	Chmp6	Lgmn
Nfyc	Asap2	Rfxank
Lgmn	Arap2	Tapbp
Rfxank	Agap3	Tnf
Tapbp	Rab11fip3	Klrc3
Tnf	Eea1	Ifi30
Klrc3	Agap2	Rfxap
Ifi30	Rufy1	Atg5
Rfxap	Acap1	Chuk
Atg5	Git1	Ddx3x
Chuk	Zfyve16	Fadd
Ddx3x	Sh3glb2	Cxcl10
Fadd	Pip5kl1	Ifna1
Cxcl10	Arfgap1	Ifna2
Ifna1	Zfyve9	Ifna4
Ifna2	Asap3	Ifna5
Ifna4	Iqsec1	Ifna9
Ifna5	Ap2s1	Ifnab
Ifna9	Chmp1a	Ifnb1
Ifnab	Iqsec3	Ikbkg
Ifnb1	Iqsec2	Il12a
Ikbkg	Ehd2	Il12b
Il12a	Rab11fip4	Nfkb1
Il12b	Rab5a	Nfkbia
Nfkb1	Vps37b	Nfkbib
Nfkbia	Agap1	Mapk11
Nfkbib	Cab39	Rela
Mapk11	Hif1a	Ripk1
Rela	Pdpk1	Tank
Ripk1	Pgf	Traf2
Tank	Rheb	Traf3
Traf2	Stk11	Map3k7
Traf3	Tsc2	Mapk10
Map3k7	Ulk1	Mapk13
Mapk10	Eif4e2	Mapk14
Mapk13	Ulk2	Mapk8
Mapk14	Mlst8	Mapk9
Mapk8	Tsc1	Ddx3y
Mapk9	Ulk3	Azi2
Ddx3y	Strada	Mapk12
Azi2	Rptor	Irf7
Mapk12	Ddit4	Irf3
Irf7	Eif4b	Otud5
Irf3	Rictor	Tbk1
Otud5	Prkaa1	Ikbke
Tbk1	Prkaa2	Sike1
Ikbke	Apaf1	Atg12
Sike1	Birc3	Rnf125
Atg12	Birc2	Ifih1
Rnf125	Xiap	Tradd
Ifih1	Bax	Tmem173
Tradd	Bcl2	Tbkbp1
Tmem173	Bid	Cyld
Tbkbp1	Capn1	Dhx58
Cyld	Capn2	D1Pas1
Dhx58	Casp12	Trim25
D1Pas1	Casp6	Dak
Trim25	Casp7	Mavs
Dak	Casp8	Ddx58
Mavs	Casp9	Nlrx1
Ddx58	Cflar	Atp4a
Nlrx1	Cycs	Atp4b
Atp4a	Cyct	Car2
Atp4b	Dffa	Slc12a7
Car2	Dffb	Slc4a1
Slc12a7	Endog	Clcnkb
Slc4a1	Fadd	Cfd
Clcnkb	Irak1	C1qa
Cfd	Myd88	C1qb
C1qa	Prkar1a	C1qc
C1qb	Prkar1b	C2
C1qc	Prkar2a	C3ar1
C2	Prkar2b	C5ar1
C3ar1	Ripk1	Cfh
C5ar1	Aifm1	Cfi
Cfh	Tradd	Dsg1a
Cfi	Endod1	Fpr2
Dsg1a	Irak3	Fpr1
Fpr2	Irak2	Fpr3
Fpr1	Exog	Hc
Fpr3	Irak4	Icam1
Hc	Actc1	Il10
Icam1	Atp1a1	Itgal
Il10	Atp1b1	Krt10
Itgal	Atp1b2	Masp1
Krt10	Atp1b3	Masp2
Masp1	Fxyd2	Plg
Masp2	Cox4i1	Ptafr
Plg	Cox5a	Selp
Ptafr	Cox5b	Selplg
Selp	Cox6a1	C1s
Selplg	Cox6a2	Fgg
C1s	Cox7a1	Dsg1b
Fgg	Cox7a2	Ctla4
Dsg1b	Cox8b	Cd28
Ctla4	Myl3	Cd80
Cd28	Myl2	Cd86
Cd80	Slc9a1	Cga
Cd86	Tnni3	Fasl
Cga	Tnnt2	Gzmb
Fasl	Tpm1	Il2
Gzmb	Tpm2	Il4
Il2	Uqcrq	Il5
Il4	Uqcrc1	Tg
Il5	Atp1a4	Cd40
Tg	Tpm3	Cd40lg
Cd40	Cyc1	Tpo
Cd40lg	Uqcrh	Tshb
Tpo	Uqcr11	Tshr
Tshb	Uqcrfs1	Il1a
Tshr	Uqcrc2	Il1b
Il1a	Uqcrb	Il6
Il1b	Atp1b4	Klra1
Il6	Cox7b2	Klra7
Klra1	Cox4i2	Aco1
Klra7	Atp1a2	Aco2
	Cox6b1	Cs
	Myh7	Fh1
	Atp1a3	Idh1
	Slc9a6	Idh3g
	Tpm4	Mdh2
	Cox6b2	Mdh1
	Actg2	Pcx
	Acta2	Pdha1
	Cyp4a14	Pdha2
	Gna13	Sucla2
	Kcnma1	Suclg2
	Kcnu1	Suclg1
	Kcnmb1	Sdhc
	Arhgef1	Sdhd
	Mrvi1	Sdha
	Myh11	Sdhb
	Myl6	Idh3a
	Ppp1r12a	Pdhb
	Npr1	Acly
	Prkce	Idh3b
	Prkch	Dlat
	Prkcq	Idh2
	Prkg1	Aspa
	Ptgir	Adsl
	Ramp1	Adssl1
	Gucy1b3	Ass1
	Ramp2
	Calcrl	Gad1
	Ramp3	Gad2
	Kcnmb4	Gfpt1
	Gucy1a3	Gfpt2
	Ppp1r14a	Glul
	Kcnmb2	Gls
	Myl9	Glud1
	Cald1	Asns
	Npr2	Nit2
	Gucy1a2	Ddo
	Cyp4a12a	Acy3
	Ppp1r12b	Gpt
	Cyp4a31	Asl
	Apc	Aldh4a1
	Axin1	Aldh5a1
	Axin2	Cps1
	Cacybp	Ppat
	Ctnnb1	Abat
	Cer1	Mlycd
	Csnk2a1	Hibch
	Csnk2a2	Cndp1
	Ctbp1	Amy1
	Ctbp2	G6pc
	Dkk1	Gaa
	Dvl1	Gpi1
	Dvl2	Gys1
	Dvl3	Hk1
	Frat1	Hk2
	Fzd1	Pygm
	Fzd3	Ugdh
	Fzd4	Treh
	Fzd5	Pgm1
	Fzd6	Uxs1
	Fzd7	Pgm2l1
	Fzd8	Gbe1
	Fzd9	Ganc
	Lef1	Agl
	Lrp5	Gck
	Lrp6	Gusb
	Mmp7	Pygb
	Nfatc1	Pygl
	Nfatc3	Hk3
	Ppard	Ugp2
	Psen1	Gys2
	Sfrp2	Mgam
	Sfrp1	Dad1
	Sfrp4	Dpagt1
	Siah1a	Adnp /// Dpm1
	Sox17	Dpm2
	Wnt8a	Ganab
	Tbl1x	B4galt1
	Tcf7	Stt3a
	Wnt1	Man1a
	Wnt9b	Man2a1
	Wnt2	Mgat1
	Wnt3	Mgat3
	LOC100503611 /// Wnt4	Rpn2
	Wnt5a	St6gal1
	Wnt5b	B4galt2 /// Ccdc24
	Wnt6	Fut8
	Wnt7a	Alg2
	Wnt7b	Dolpp1
	Wnt8b	B4galt3
	Wif1	Mogs
	Porcn	Alg5
	Nfat5	Alg14
	Sfrp5	4933434I20Rik
	Ruvbl1	Mgat4c
	Dkk2	Alg13
	Fzd2	Stt3b
	Ctnnbip1	Dpm3
	Chd8	Tusc3
	Nkd2	Alg9
	Senp2	Mgat4b
	Daam2	Mgat5
	Csnk1a1	Man2a2
	Vangl2	Alg11
	Nkd1	Alg3
	Prickle1	Mgat2
	Daam1	Alg12
	Frat2	Man1b1
	Wnt9a	Dolk
	Vangl1	Man1c1
	4930444G20Rik /// AF366264	St6gal2
	Dkk4	Mgat4a
	Prickle2	Glt28d2
	Cxxc4	Alg6
	Etv6	Alg10b
	Notch1	Alg8
	Notch2	Galnt1
	Notch3	Galnt3
	Notch4	Galnt4
	Ets1	Gcnt1
	Ets2	St3gal1
	Fmn2	St3gal2
	Piwil2	St6galnac1
	Piwil1	B4galt5
	Spire1	C1galt1c1
	Spire2	Galntl5
	Piwil4	Gcnt3
	Adam17	Galntl2
	Dll1	Galnt2
	Dll3	Galnt7
	Dtx1	Galntl1
	Kat2a	Galnt6
	Hes1	Galntl4
	Hes5	Galntl6
	Jag1	B3gnt6
	Jag2	Fut4
	Numb	Fut7
	Kat2b	Fut9
	Psen2	Lfng
	Ptcra	Mfng
	Rbpj	Rfng
	Ncor2	St3gal3
	Dll4	Pomgnt1
	Ncstn	Pofut2
	Psenen	Chst10
	Snw1	Pomt1
	Cir1	Ogt
	Dtx2	Pofut1
	Dtx3	Pomt2
	Maml1	Gxylt1
	Dtx4	Poglut1
	Aph1b	Gxylt2
	Aph1a	B3galtl
	Bmp4	Chi3l1
	Bmp5	Cmah
	Bmp6	Cmas
	Bmp8a	Galt
	Bmp8b	Galk1
	Dhh	Hexa
	Gas1	Hexb
	Gli1	Renbp
	Gli2	Tsta3
	Gli3	Gnpda1
	Lrp2	Pmm1
	Hhip	Gne
	Ihh	Pmm2
	Ptch1	Gnpnat1
	Ptch2	Nagk
	Rab23	Nanp
	Shh	Gnpda2
	Zic2	Gmppa
	Sufu	Galk2
	Csnk1g3	Chit1
	Csnk1g2	Cyb5r1
	Csnk1d	Npl
	Csnk1g1	Gale
	Smo	Fpgt
	Chrd	Chia
	Comp	Nans
	Dcn	LOC640502 /// Uap1
	Lefty1	Cyb5r3
	Fst	Pgm3
	Id1	Mpi
	Id2	Gmds
	Id3	Uap1l1
	Id4	Fuk
	Smad1	Amdhd2
	Smad5	Cyb5r2
	Nodal	Gmppb
	Nog	Gla
	Pitx2	Arsa
	Sp1	Asah1
	Thbs1	Glb1
	Thbs2	Degs1
	Thbs3	Galc
	Thbs4	Gba
	Smad9	Neu1
	Ltbp1	Sgpl1
	Lefty2	Smpd1
	Rhod	Smpd2
	Cdk5	Sphk1
	Cfl1	Sptlc2
	Cfl2	Ugcg
	Dcc	Ugt8a
	Efna1	Neu2
	Efna2	Neu3
	Efna3	Gal3st1
	Efna4	Asah2
	Efna5	B4galt6
	Efnb1	Sphk2
	Efnb2	Smpd3
	Efnb3	Acer3
	Epha1	Degs2
	Epha2	Kdsr
	Epha3	Sgms2
	Epha4	Smpd4
	Epha5	Sgpp1
	Epha6	Acer1
	Epha7	Sgms1
	Epha8	Cerk
	Ephb2	Sptlc3
	Ephb3	Acer2
	Ephb4	Sptlc1
	Ephb6	Sgpp2
	Fes	9130409I23Rik
	Srgap2	Fut1
	Fyn	Fut2
	Itgb1	Gcnt2
	L1cam	Ggta1
	Limk1	St3gal4
	Limk2	St8sia1
	Nrp1	B3galt1
	Ntn1	B3galt2
	Ntn3	St3gal6
	Plxna1	B4galt4
	Plxna2	Sec1
	Plxna3	B3gnt3
	Robo3	Abo
	Robo1	B3galt5
	Sema3a	B3gnt5
	Sema3b	B3gnt1
	Sema3c	B3gnt4
	Sema3e	Naga
	Sema3f	B3galnt1
	Sema4a	Gbgt1
	Sema4b	A4galt
	Sema4c	Slc33a1
	Sema4d	B4galnt1
	Sema4f	St6galnac3
	Sema5a	St6galnac4
	Sema5b	St3gal5
	Sema6a	St6galnac5
	Sema6b	St6galnac6
	Sema6c	B3galt4
	Sema7a	St8sia5
	Slit1	Hao1
	Slit2	Mut
	Slit3	Hao2
	Unc5c	Pccb
	Sema4g	Pgp
	Rgs3	Hyi
	Ngef	Mcee
	Plxnc1	Grhpr
	Ntn4	Pcca
	Ntng1	Acads
	Unc5a	Hmgcl
	Unc5b	Acsm3
	Sema3d	Oxct2a
	C030027H14Rik /// Srgap1	Oxct1
	Plxnb2	Bdh2
	Plxnb3	Bdh1
	Unc5d	Aacs
	Sema6d	Akr1c6
	Sema3g	Acsm1
	Rnd1	Hmgcs1
	Ablim1	L2hgdh
	Ablim2	Acsm2
	Plxnb1	Acsm5
	Lrrc4c	Ggps1
	Plxna4	Hmgcr
	Srgap3	Mvk
	Robo2	Pdss1
	Ephb1	Dhdds
	Ablim3	Pmvk
	Acp5	Fdps
	Btk	Mvd
	Socs3	Idi1
	Socs1	Rplp0
	Creb1	Fau
	Csf1	Rps2
	Ctsk	Rpl10a
	Cyba	Rpl18
	Cybb	Rpl26
	Fcgr1	Rpl27
	Fcgr2b	Rpl37a
	Fcgr3	Rpl6
	Fhl2	Rpl7
	Gab2	Rpl9
	Irf9	Rps14
	Itgb3	Rps16
	Jak1	Rps17
	Lck	Rps18
	Lcp2	Rps19
	Blnk	Gm10119 /// Gm9000 /// Rps3a
	Mitf	Rps4x
	Ncf2	Rps5
	Ncf4	Rps6
	Lilrb3	Rps7
	Pparg	Rpl13a
	Sirpa	Uba52
	Sfpi1	Rpl8
	Sykb	Rps3
	Tec	Rps11
	Tyrobp	Rpl3l
	Tyk2	Rpl35
	Cyld	Rpl11
	Trem2	Rps10
	Oscar	Rpl14
	Fcgr4	Rplp2
	Actb	LOC100503815 /// LOC100504784 /// Rpl39
	Actg1	Rpl38
	Actn2	Rpl4
	Actn3	Rpl22l1
	Arhgap5	Rpl39l
	Chad	Rps9
	Col11a1	Rsl24d1
	Col11a2	Rpl17
	Col2a1	Srprb
	Col3a1	Srp9
	Col4a1	Srp19
	Col4a2	Immp1l
	Col4a4	Spcs2
	Col4a5	Srp72
	Col5a1	Spcs1
	Col5a2	Oxa1l
	Col6a1	Sec62
	Col6a2	Spcs3
	Col6a3	Immp2l
	Col1a1	Akt1
	Col1a2	Akt2
	Diap1	Atf4
	Fn1	Bdnf
	Ibsp	Cacna1a
	Ilk	Cacna1b
	Itga2	Cacna1c
	Itga3	Cacna1d
	Itga4	Cacna1e
	Itga5	Cacna1g
	Itga6	Cacna1s
	Itga7	Cacna2d1
	Itgav	Cacna2d3
	Itgb5	Cacnb1
	Itgb6	Cacnb2
	Itgb7	Cacnb3
	Lama1	Cacnb4
	Lama2	Cacng1
	Lama3	Cacng2
	Lama4	Cdc25b
	Lama5	Cdc42
	Lamb1	Crk
	Lamb2	Daxx
	Lamb3	Ddit3
	Lamc2	Dusp2
	Myl7	Egf
	Mylpf	Elk1
	Pten	Elk4
	Reln	Mecom
	Spp1	Fgf1
	Tln1	Fgf2
	Tnc	Fgf3
	Vasp	Fgf4
	Vcl	Fgf5
	Vtn	Fgf6
	Vwf	Fgf7
	Zyx	Fgf8
	Lamc3	Fgf9
	Col5a3	Fgfr1
	Parva	Fgfr3
	Myl10	Fgfr4
	Actn4	Fos
	Parvg	Gna12
	2900073G15Rik	Gng12
	Myl12b	Grb2
	Col6a4	Nr4a1
	Tln2	Hras1
	Tnxb	Hspb1
	Col4a6	Il1r1
	Itga9	Il1r2
	Rapgef1	Jun
	Itga1	Kras
	Actn1	Stmn1
	Parvb	Mapkapk2
	Itgb4	Mapkapk5
	Lamc1	Max
	Grlf1	Mef2c
	Itga8	Mknk1
	Itgb8	Mknk2
	Dock1	Mos
	Agrn	Mras
	Cd36	Mapt
	Cd44	Myc
	Dag1	Nf1
	Gp1ba	Nfatc2
	Gp1bb	Nfkb2
	Gp5	Ngf
	Hmmr	Nlk
	Sdc2	Nras
	Hspg2	Ntf3
	Cd47	Ntrk1
	Sdc1	Ntrk2
	Sdc3	5530400B01Rik /// Dusp8
	Sdc4	Pak1
	Gp9	Pdgfa
	Sv2a	Pdgfb
	Sv2b	Pdgfra
	Sv2c	Pdgfrb
	Npnt	Prkaca
	Gp6	Prkacb
	Ctnna1	Prkca
	Ctnna2	Prkcb
	Ctnnd1	Prkcc
	Cdh1	Ppm1a
	Fert2	Ppm1b
	Ptpn6	Ppp3ca
	Insr	Ppp3cb
	Mllt4	Ppp3cc
	Ptpn1	Ppp3r1
	Ptprb	Ppp3r2
	Ptprf	Ppp5c
	Ptprj	Mapk8ip1
	Ptprm	Prkx
	Pvrl2	Dusp1
	Sorbs1	Ptpn5
	Snai2	Ptprr
	Snai1	Rac2
	Tjp1	Rasgrp2
	Yes1	Rasgrf1
	Iqgap1	Rasgrf2
	Pvrl1	Rasgrp1
	Pvrl3	Relb
	Pvrl4	Rras
	Ssx2ip	Sos1
	Baiap2	Sos2
	Ctnna3	Srf
	Farp2	Tgfb1
	Lmo7	Tgfb2
	Cask	Tgfb3
	Inadl	Tgfbr1
	Cldn1	Tgfbr2
	Cldn2	Tnfrsf1a
	Cldn3	Akt3
	Cldn4	Map2k5
	Cldn5	Mapk7
	Cttn	Map2k1
	Epb4.1l1	Map2k2
	Epb4.1l2	Map2k3
	Epb4.1l3	Map2k4
	Magi1	Map2k6
	Hcls1	Map2k7
	F11r	Map3k2
	Llgl1	Map3k3
	Mpdz	Map3k4
	Myh2	Map3k5
	Myh3	Map3k8
	Myh4	Map4k1
	Myh9	Map4k2
	Ocln	Mapk3
	Exoc4	Map4k4
	Spnb2	Ecsit
	Tjp2	Mapk8ip3
	Tjp3	Map3k6
	Vapa	Cacng3
	Magi2	Cacng4
	Ppp2r2d	Cacng6
	Cldn7	Cacna1f
	Cldn6	Stk3
	Cldn8	Cacna2d2
	Mpp5	Cacna1h
	Csda	Stk4
	Cldn9	Mapk8ip2
	Jam2	B230120H23Rik
	Sympk	Tab1
	Rab13	Dusp6
	Rab3b	Tab2
	Cgn	Flnc
	Myh14	2010110P09Rik
	Ppp2r2a	Dusp3
	Igsf5	Nfatc4
	Ppp2r2b	Dusp9
	4930412D23Rik	Rapgef2
	Tjap1	Ntf5
	4930468A15Rik	Cacng7
	Amotl1	Cacng8
	Myh10	Mapkapk3
	Jam3	Arrb1
	Magi3	Braf
	Ash1l	Rap1a
	Exoc3	Raf1
	Llgl2	Rasa2
	Crb3	Cacng5
	Ppp2r2c	Rac3
	Drd2	Flna
	Gja1	Rap1b
	Gjd2	Arrb2
	Lpar1	Taok1
	Prkg2	Rasa1
	Tuba1a	Pak2
	Tuba4a	Map4k3
	Tubb2a	Rasgrp4
	Tubb3	Dusp7
	Tubb4	Rasgrp3
	Tubb5	Dusp5
	Tuba8	Flnb
	Tubb6	Dusp4
	Tubb2b	Cacna2d4
	Tubb2c	Abl1
	Tubb1	Abl2
	Cfd	Araf
	Serpinc1	Areg
	Serping1	Bad
	C1qa	Btc
	C1qb	Camk2a
	C1qc	Camk2b
	C2	Camk2g
	C3ar1	Cdkn1b
	C4bp	Erbb2
	C5ar1	Erbb3
	C6	Erbb4
	C9	Ereg
	Cd59a	Ptk2
	Cfh	Gab1
	Cfi	Hbegf
	Cr2	Nck1
	Cr1l	Nck2
	Cd55	Nrg3
	Daf2	Pak3
	F10	Pik3r1
	F13b	Pik3r2
	F3	Pik3r3
	F5	Shc1
	F7	Shc3
	F8	Src
	F9	Stat5a
	Fga	Stat5b
	Serpind1	Tgfa
	Klkb1	Gsk3b
	Kng1	Mtor
	Masp1	Pak4
	Masp2	Nrg4
	Mbl1	Camk2d
	Mbl2	Nrg1
	Cd46	Pak6
	Serpine1	Shc2
	Plat	Pak7
	Plau	Pik3r5
	Plg	Nrg2
	Serpinf2	Chrna7
	Proc	Adcy7
	Pros1	Adcy8
	Serpina1a	Adcy9
	Serpina1b	Adora2a
	Serpina1c	Adora2b
	Tfpi	Adra1b
	Thbd	Adra1a
	C1s	Adrb1
	C1ra	Adrb2
	Cpb2	Adrb3
	F12	Agtr1a
	C8g	Agtr1b
	F13a1	Slc25a4
	Fgg	Slc25a5
	Fgb	Atp2a1
	C8b	Atp2a2
	C8a	Atp2b2
	A2m	Bdkrb1
	Serpina5	Bdkrb2
	Cd247	Bst1
	Cd48	Camk4
	Fcer1g	Cckar
	Gzmb	Cckbr
	H60a	Cd38
	Icam1	Chrm1
	Icam2	Chrm3
	Itgal	Drd1a
	Itgb2	Ednra
	Klra1	Ednrb
	Klra7	F2r
	Klrc1	Gna11
	Klrc2	Gna14
	Klrd1	Gna15
	Lat	Gnal
	Klrb1c	Gnaq
	Ncr1	Gnas
	Cd244	Grin1
	Sh2d1a	Grin2a
	Zap70	Grin2c
	Hcst	Grin2d
	Sh3bp2	Grm1
	Klrk1	Grpr
	Ulbp1	Hrh1
	Bcl10	Hrh2
	Ctla4	Htr2b
	Cd28	Htr2c
	Cd3d	Htr4
	Cd3e	Htr5a
	Cd3g	Htr5b
	Cd8a	Htr6
	Cd8b1	Htr7
	Dlg1	Itpr1
	Grap2	Itpr2
	Nfkbie	Itpr3
	Pdcd1	Lhcgr
	Ptprc	Nos2
	Icos	Nos3
	Card11	Ntsr1
	Pdk1	Oxtr
	Malt1	P2rx1
	Cdh5	P2rx4
	Itgam	P2rx7
	Mmp2	P2rx6
	Mmp9	Pde1a
	Msn	Pde1b
	Pecam1	Pde1c
	Sipa1	Phka1
	Thy1	Phkg1
	Txk	Pln
	Vcam1	Ptger1
	Ezr	Ptger3
	Rassf5	Ptgfr
	Esam	Ryr1
	Rhoh	Ryr2
	Rapgef3	Ryr3
	Cd99	Slc8a1
	Gria1	Tacr1
	Gria2	Tacr2
	Grin2b	Tacr3
	Ppp1r1a	Tbxa2r
	Arhgdib	Tnnc1
	Csk	Tnnc2
	Irs1	Trhr
	Irs3	Trpc1
	Irs4	Vdac1
	Sh2b3	Vdac2
	Ntrk3	Vdac3
	Sh2b1	Avpr1b
	Sort1	Atp2a3
	Trp73	Avpr1a
	Sh2b2	Ltb4r2
	Zfp110	Cysltr1
	Prdm4	Atp2b1
	Kidins220	Phkg2
	Maged1	Cysltr2
	Zfp369	Calml3
	Ripk2	Slc25a31
	Arhgdia	Calm4
	Frs2	P2rx5
	Irs2	Phkb
	Crh	Adcy4
	Gnao1	Adcy3
	Gnaz	Mylk
	Grid2	Grm5
	Gsbs	Phka2
	Gria3	Slc8a2
	Chrm4	Slc8a3
	Enah	Adcy2
	Fgd1	P2rx3
	Itgae	P2rx2
	Itgax	Atp2b3
	Pfn1	Atp2b4
	Pfn2	Adcy1
	Pikfyve	Acvr1
	Pip4k2a	Acvr2a
	Tmsb4x	Acvr2b
[truncated: 1,280 more rows]

## Sheet: 48h
48hr upregulated_Gene Symbol	48hr downregulated_Gene Symbol	48hr_Gene Symbol(4580)	48hr_Microarray overlap(484)
Adh1	Aco1	Aco1	Acly
Adh7	Aco2	Aco2	Fbp1
Adh5	Cs	Cs	Gpi1
Aldh1a1	Dld	Dld	Rbks
Aldh2	Fh1	Fh1	Pgm2
Aldh3a1	Idh1	Idh1	Dera
Aldh3a2	Idh3g	Idh3g	Aldh1b1
Aldoc	Mdh2	Mdh2	Hk2
Bpgm	Mdh1	Mdh1	Gck
Dld	Ogdh	Ogdh	Cyp39a1
Eno1 /// Gm5506 /// LOC100503183	Pck1	Pck1	Cyp17a1
Eno2	Pcx	Pcx	Adcy6
Eno3	Pdha1	Pdha1	Adcy8
Fbp2	Pdha2	Pdha2	Adk
Fbp1	Sucla2	Sucla2	Fhit
G6pc	Suclg2	Suclg2	Nme1
Gapdh	Suclg1	Suclg1	Nme2
Gpi1	Sdhc	Sdhc	Pde1b
Hk1	Sdhd	Sdhd	Pde4b
Hk2	Sdha	Sdha	Gucy1a3
Ldha	Sdhb	Sdhb	Polr3gl
Ldhb	Idh3a	Idh3a	Nme5
Ldhc	Pdhb	Pdhb	Cant1
Pck1	Csl	Csl	Nt5c2
Pdha1	Pck2	Pck2	Adcy3
Pdha2	Dlst	Dlst	Pde2a
Pfkl	Acly	Acly	Pde8b
Pfkm	Idh3b	Idh3b	Adcy5
Pgam1	Dlat	Dlat	Npr2
Pgk1	Idh2	Idh2	Pde11a
Pgk2	Aldoc	Aldoc	Adcy10
Pkm2	Fbp2	Fbp2	Gad1
Pklr	Fbp1	Fbp1	Gpt2
Tpi1	G6pd2	G6pd2	Bcat1
Adh4	G6pdx	G6pdx	Pygb
Pgam2	Gpi1	Gpi1	Man1a2
Pfkp	Pfkl	Pfkl	St6gal1
Aldh9a1	Pfkm	Pfkm	Man1c1
Aldh1a3	Prps1	Prps1	Mgat5b
Akr1a4	Rpia	Rpia	Galnt7
Acss2	Taldo1	Taldo1	Lfng
Pgm1	Tkt	Tkt	St3gal3
Aldh3b1	Pfkp	Pfkp	Pofut2
Pdhb	Pgls	Pgls	Pomt1
Acss1	Pgm1	Pgm1	Chst11
Adpgk	Rbks	Rbks	Ext1
Pgm2	Pgm2	Pgm2	Ext2
Aldh1b1	Tktl2	Tktl2	Hs6st2
Pck2	Prps1l1	Prps1l1	Hs6st3
Gck	Tktl1	Tktl1	Extl3
Ldhal6b	H6pd	H6pd	Hs3st3b1
Aldh7a1	Pgd	Pgd	Hs3st2
Hk3	Prps2	Prps2	Agpat3
Aldob	Aldob	Aldob	Mboat2
Dlat	Dera	Dera	Ppap2b
Galm	Aldh1a1	Aldh1a1	Dgkz
Akr1b3	Aldh2	Aldh2	Dgkg
Akr1b7	Aldh3a2	Aldh3a2	Gpat2
Akr1b8	Akr1b3	Akr1b3	Dgki
Khk	Akr1b7	Akr1b7	Dgkh
Pfkfb1	Akr1b8	Akr1b8	Cyp2e1
Pfkfb2	Ugdh	Ugdh	Ptgds
Sord	Ugt2b5	Ugt2b5	Ptgs1
Tsta3	Dcxr	Dcxr	Tbxas1
Pmm1	Cryl1	Cryl1	Pla2g6
Mtmr1	Dhdh	Dhdh	Cyp4f15
Pmm2	Ugt2b1	Ugt2b1	St6galnac3
Mtmr7	Ugt2a3	Ugt2a3	Bdh1
Gmppa	Aldh1b1	Aldh1b1	Fech
Phpt1	Ugt2b34	Ugt2b34	Hmox2
Fpgt	Xylb	Xylb	Pdss1
Mtmr2	Gusb	Gusb	Farsb
Akr1c6	Ugp2	Ugp2	Fars2
Mpi	Ugt2b36	Ugt2b36	Uck2
Pfkfb3	Gla	Gla	Fads2
Gmds	Glb1	Glb1	Aanat
Mtmr6	G6pc	G6pc	Acadl
Fuk	Gaa	Gaa	Alpl
Pfkfb4	Galt	Galt	Bckdhb
9630033F20Rik	B4galt1	B4galt1	Bhmt
Gmppb	Galk1	Galk1	Degs1
Ugdh	Hk1	Hk1	Dnmt3a
Ugt2b5	Hk2	Hk2	Dnmt3b
Miox	Lalba	Lalba	Gcnt2
Ugt2b1	B4galt2 /// Ccdc24	B4galt2 /// Ccdc24	Ldha
Ugt2a3	Galk2	Galk2	Nos1
Ugt2b34	Gale	Gale	Odc1
Ugt2b36	Ganc	Ganc	Plcb1
Gulo	Gck	Gck	Plcb4
Acadl	Hk3	Hk3	Polg
Acadm	Lct	Lct	Aldh1a2
Acadvl	Mgam	Mgam	Sptlc2
Acads	Cel	Cel	Synj2
Acox1	Cyp27b1	Cyp27b1	Btd
Cpt1a	Cyp51	Cyp51	Naglu
Cpt2	Dhcr7	Dhcr7	Aldh18a1
Cyp4a14	Ebp	Ebp	Hibadh
Dci	Fdft1	Fdft1	Bcmo1
Acsl1	Hsd17b7	Hsd17b7	Ndufa9
Hadh	Lipa	Lipa	Pigc
Peci	Nsdhl	Nsdhl	Qprt
Acsl4	Soat1	Soat1	Tha1
Acaa2	Sqle	Sqle	Coq2
Ehhadh	Sc4mol	Sc4mol	Plce1
Acsl3	Tm7sf2	Tm7sf2	Pank2
Cpt1c	Dhcr24	Dhcr24	Cds1
Acox3	Soat2	Soat2	Mccc2
Echs1	Sc5d	Sc5d	Adi1
Acat1	Cyp2r1	Cyp2r1	Mthfd1
Acaa1a	Baat	Baat	Sephs1
Acsl6	Ch25h	Ch25h	Impa2
Acaa1b	Cyp46a1	Cyp46a1	Sgms1
Gcdh	Cyp7a1	Cyp7a1	Inpp5a
Cyp4a12a	Cyp7b1	Cyp7b1	Itpk1
Acsbg2	Cyp8b1	Cyp8b1	Gmds
Acsl5	Hsd17b4	Hsd17b4	Nmnat2
Cyp4a31	Amacr	Amacr	Ccbl2
Agxt	Scp2	Scp2	Plcg2
Alas1	Slc27a5	Slc27a5	Phgdh
Alas2	Cyp39a1	Cyp39a1	A4galt
Aoc3	Acox2	Acox2	Inpp4a
Bhmt	Hsd3b7	Hsd3b7	Itpkb
Cbs	Cyp27a1	Cyp27a1	Pigl
Dao	Akr1d1	Akr1d1	Pon2
Gamt	Comt1	Comt1	Abcb1a
Gnmt	Cyp11a1	Cyp11a1	Abcd4
Maoa	Cyp11b2	Cyp11b2	Abcc6
Pipox	Cyp17a1	Cyp17a1	Abcb9
Shmt1	Cyp19a1	Cyp19a1	Rps10
Srr	Cyp1a1	Cyp1a1	Immp2l
Tdh	Cyp1b1	Cyp1b1	Akt2
Gatm	Cyp21a1	Cyp21a1	Cacna1a
Tha1	Cyp3a11	Cyp3a11	Cacna1d
Dmgdh	Cyp3a13	Cyp3a13	Cacna1s
Psph	Cyp3a16	Cyp3a16	Cacna2d3
Gldc	H2-Ke6	H2-Ke6	Cacnb2
Cth	Hsd11b1	Hsd11b1	Cacnb4
Shmt2	Hsd11b2	Hsd11b2	Mecom
Maob	Hsd17b1	Hsd17b1	Fgf10
Sardh	Hsd17b2	Hsd17b2	Fgf12
Chdh	Hsd17b3	Hsd17b3	Fgf15
Sds	Hsd3b1	Hsd3b1	Fgf6
Glyctk	Hsd3b2	Hsd3b2	Fgfr1
Phgdh	Hsd3b5	Hsd3b5	Fgfr2
Amd1	Sult1e1	Sult1e1	Gna12
Mat1a	Sts	Sts	Myc
Cdo1	Hsd17b6	Hsd17b6	Nfkb1
Dnmt1	Sult2b1	Sult2b1	Ntf3
Trdmt1	Hsd17b12	Hsd17b12	Pdgfra
Dnmt3a	Cyp3a25	Cyp3a25	Prkca
Dnmt3b	Srd5a3	Srd5a3	Ppp3ca
Got1	Srd5a1	Srd5a1	Dusp1
Got2	Srd5a2	Srd5a2	Ptprr
Srm	Akr1c18	Akr1c18	Traf2
Tst	Cyp11b1	Cyp11b1	Gadd45g
Dnmt3l	Cyp3a44	Cyp3a44	Map2k5
Apip	Ada	Ada	Map2k6
Mtap	Adcy6	Adcy6	Map3k11
Enoph1	Adcy7	Adcy7	Map3k3
Mri1	Adcy8	Adcy8	Map3k7
Ahcyl2	Adcy9	Adcy9	Mapk13
Lao1	Adk	Adk	Cacna2d2
Adi1	Adsl	Adsl	Fgf23
Mat2b	Adssl1	Adssl1	B230120H23Rik
Ahcyl1	Adss	Adss	Rras2
Mat2a	Ak1	Ak1	Rapgef2
Tat	Ak2	Ak2	Arrb1
Mtr	Ak4	Ak4	Cacng5
Mpst	Ampd3	Ampd3	Map4k3
Ahcy	Aprt	Aprt	Rasgrp3
Aox1	Entpd1	Entpd1	Flnb
Auh	Entpd2	Entpd2	Dusp4
Bcat1	Entpd6	Entpd6	Cacna2d4
Bcat2	Entpd5	Entpd5	Adra1b
Bckdha	Dck	Dck	Atp2b2
Bckdhb	Fhit	Fhit	Camk2a
Dbt	Gart	Gart	Gna14
Hsd17b10	Gda	Gda	Gnaq
Hmgcl	Gucy2c	Gucy2c	Grin2c
Hmgcs2	Gucy2e	Gucy2e	Grm1
Mut	Guk1	Guk1	Hrh2
Ivd	Hprt	Hprt	Itpr1
Hibadh	Itpa	Itpa	Ntsr1
Oxct2a	Nme1	Nme1	Tacr2
Pccb	Nme2	Nme2	Tacr3
Acad8	Npr1	Npr1	Tbxa2r
Oxct1	Pde1a	Pde1a	Vdac1
Mccc1	Pde1b	Pde1b	Atp2b1
Mcee	Pde1c	Pde1c	Camk2d
Mccc2	Pde3b	Pde3b	Grm5
Aldh6a1	Pde4a	Pde4a	Ccr5
Pcca	Pde4b	Pde4b	Flt1
Hmgcs1	Pde6d	Pde6d	Il10rb
Hibch	Pde7a	Pde7a	Il3
Abat	Pde8a	Pde8a	Met
Nsd1	Pde9a	Pde9a	Cx3cl1
Ogdh	Pde6b	Pde6b	Cxcl12
Plod1	Pde6g	Pde6g	Tnfrsf19
Suv39h1	Enpp1	Enpp1	Csk
Aadat	Pkm2	Pkm2	Ptk2
Plod2	Pklr	Pklr	Gng2
Plod3	Pnp	Pnp	Grk5
Aass	Pola1	Pola1	Hck
Suv39h2	Pola2	Pola2	Pxn
Setd8	Pold1	Pold1	Shc3
Setd7	Pold2	Pold2	Tiam2
Setmar	Pole	Pole	Gsk3b
Ehmt1	Pole2	Pole2	Vav3
Dlst	Prim1	Prim1	Wasl
Setdb1	Prim2	Prim2	Pard3
Whsc1	Polr1c	Polr1c	Elmo1
Ehmt2	Polr1b	Polr1b	Prex1
Bbox1	Polr1d	Polr1d	Gsk3a
Ash1l	Polr1a	Polr1a	Adra2a
Tmlhe	Polr2a	Polr2a	Cnr2
Setd1b	Polr2c	Polr2c	Fshr
Dot1l	Polr2j	Polr2j	Gabrg3
Suv420h1	Rrm1	Rrm1	Lpar1
Suv420h2	Rrm2	Rrm2	Grid1
Setd1a	Uox	Uox	Grid2
Glt25d1	Xdh	Xdh	Grik3
Setd2	Impdh1	Impdh1	Ptger4
Setdb2	Nt5e	Nt5e	Thrb
Glt25d2	Papss1	Papss1	Aplnr
Aspa	Papss2	Papss2	S1pr5
Ddc	Pde10a	Pde10a	Grik4
Ftcd	Dguok	Dguok	Gipr
Hal	Pde7b	Pde7b	Hcrtr2
Hdc	Nt5c	Nt5c	Atm
Mettl2	Nudt5	Nudt5	Ccnd3
Wbscr22	Gucy1b3	Gucy1b3	Cdk6
Mettl6	Nme6	Nme6	Bbc3
Hemk1	Pde3a	Pde3a	Nfe2l2
Acy3	Nme4	Nme4	Rad23a
Amdhd1	Pole3	Pole3	Park2
Abp1	Gucy1a3	Gucy1a3	Dnajc5b
Hnmt	Polr1e	Polr1e	Sil1
Uroc1	Znrd1	Znrd1	Ssr1
Cndp1	Gmpr	Gmpr	Nploc4
Prdx6	2310004I24Rik	2310004I24Rik	Capn2
Hpd	Nudt2	Nudt2	Ap3b1
Mif	Polr2e	Polr2e	Ctsc
Pah	2310079N02Rik	2310079N02Rik	Ctsh
Aanat	Pole4	Pole4	Igf2r
Cat	Polr3k	Polr3k	Naga
Cyp1a1	Paics	Paics	Sort1
Cyp1a2	Polr3d	Polr3d	Gga1
Cyp1b1	Entpd4	Entpd4	Laptm4b
Ido1	Polr3g	Polr3g	Cav1
Inmt	Polr2g	Polr2g	Asap1
Tph1	Pold3	Pold3	Ehd1
Wars	Polr2d	Polr2d	Igf1r
Tdo2	Pold4	Pold4	Smad2
Ccbl1	Polr2f	Polr2f	Nedd4
Kynu	Polr3gl	Polr3gl	Sh3gl3
Afmid	Polr2i	Polr2i	Stam
Kmo	Polr3f	Polr3f	Ehd3
Haao	Polr3b	Polr3b	Sh3kbp1
Ido2	Nt5c1b	Nt5c1b	Ap2b1
Tph2	Pnpt1	Pnpt1	Chmp5
Ccbl2	Entpd8	Entpd8	Rab31
Aga	Nudt9	Nudt9	Wwp1
Glb1	Polr3c	Polr3c	Arap2
Gba	Nme5	Nme5	Agap3
Hexa	Cant1	Cant1	Git1
Hexb	Nt5c2	Nt5c2	Vps37b
Man2b1	1190003J15Rik	1190003J15Rik	Eif4e
Man2b2	Pde6h	Pde6h	Rheb
Neu1	Ak7	Ak7	Rptor
Neu2	Polr3h	Polr3h	Ddit4
Neu3	Allc	Allc	Eif4b
Fuca2	Nt5m	Nt5m	Rictor
Fuca1	Adcy4	Adcy4	Bcl2l1
Man2c1	Adcy3	Adcy3	Endod1
Manba	Gmpr2	Gmpr2	Irak3
Engase	Nt5c3	Nt5c3	Tpm3
Hexdc	Atic	Atic	Kcnma1
B4galt1	Ampd2	Ampd2	Myh11
St3gal3	Pde6c	Pde6c	Prkce
St3gal1	Nme7	Nme7	Prkcq
St3gal2	Pde2a	Pde2a	Prkg1
Chst4	Enpp3	Enpp3	Myl7
B4galt2 /// Ccdc24	Adcy2	Adcy2	Dkk1
Fut8	Entpd3	Entpd3	Lef1
Chst2	Pde8b	Pde8b	Nfatc1
B4galt4	Polr3a	Polr3a	Sfrp1
Chst5	Adcy5	Adcy5	Tcf7l1
B4galt3	Pde6a	Pde6a	Tcf7l2
Chst1	Gmps	Gmps	Wnt3
B3gnt1	Prune	Prune	Chd8
B3gnt7	Ampd1	Ampd1	Prickle1
Inpp1	Ak5	Ak5	Daam1
Inpp5b	Npr2	Npr2	Prickle2
Inppl1	Ppat	Ppat	Etv6
Minpp1	Polr2b	Polr2b	Notch1
Pik3c2a	6330407I18Rik	6330407I18Rik	Notch2
Pik3c2g	Pfas	Pfas	Ets2
Pik3ca	AI452195	AI452195	Piwil1
Pik3cd	Pde11a	Pde11a	Spire1
Pikfyve	Pde5a	Pde5a	Gli3
Pip5k1c	Adcy10	Adcy10	Zic2
Pip4k2a	Rrm2b	Rrm2b	Sufu
Pip5k1b	Adcy1	Adcy1	Csnk1g2
Pip5k1a	Aspa	Aspa	Id3
Plcb1	Agxt	Agxt	Smad1
Plcb2	Ass1	Ass1	Thbs2
Plcb3	Gad1	Gad1	Lefty2
Plcb4	Gad2	Gad2	Abl1
Plcd1	Gfpt1	Gfpt1	Dpysl2
Plcd4	Gfpt2	Gfpt2	Efna3
Plcg1	Glul	Glul	Efna5
Inpp5k	Gls	Gls	Epha1
Pten	Glud1	Glud1	Epha3
Synj2	Got1	Got1	Epha4
Pik3cg	Got2	Got2	Epha6
Cdipt	Asns	Asns	Srgap2
Impa1	Nit2	Nit2	Fyn
Inpp5e	Cad	Cad	Pak3
Pi4k2b	Ddo	Ddo	Plxna2
Ipmk	Acy3	Acy3	Robo3
Isyna1	Gpt	Gpt	Robo1
Plcd3	Lao1	Lao1	Sema4c
Plce1	Gpt2	Gpt2	Sema6a
Pik3cb	Asl	Asl	Slit1
Ippk	Aldh4a1	Aldh4a1	Slit2
Pi4k2a	Aldh5a1	Aldh5a1	Slit3
Synj1	Gls2	Gls2	Unc5c
Pi4kb	Cps1	Cps1	Rgs3
Pip4k2b	Agxt2	Agxt2	Plxnc1
Impa2	Abat	Abat	Dpysl5
Plcz1	Bcat1	Bcat1	Sema6d
Pip4k2c	Bcat2	Bcat2	Ablim1
Inpp5j	Vars	Vars	Plxna4
Inpp5a	Vars2	Vars2	Blnk
Itpk1	Lars2	Lars2	Ncf2
Pi4ka	Iars	Iars	Tyk2
Pik3c3	Lars	Lars	Cyld
Pip5kl1	Iars2	Iars2	Col4a1
Itpka	Amy1	Amy1	Col4a2
Inpp4b	Gys1	Gys1	Itga5
Plcg2	Pygm	Pygm	Itgb5
Inpp4a	Treh	Treh	Itgb6
Itpkb	Uxs1	Uxs1	Lama1
Ocrl	Pgm2l1	Pgm2l1	Lama5
Cyp2c29	Gbe1	Gbe1	Lamb3
Cyp2c37	Agl	Agl	Reln
Cyp2c38	Pygb	Pygb	Tnc
Cyp2c39	Pygl	Pygl	Vasp
Cyp2e1	Gys2	Gys2	Vcl
Cyp2j5	Dad1	Dad1	Parva
Cyp2j6	Ddost	Ddost	Tln2
Cyp3a11	Dpagt1	Dpagt1	Actn1
Cyp3a13	Dpm1	Dpm1	Itga8
Cyp3a16	Dpm2	Dpm2	Dock1
Pla2g1b	Ganab	Ganab	Gp1ba
Pla2g2a	Stt3a	Stt3a	Hspg2
Pla2g2c	Man1a	Man1a	Cd47
Pla2g2d	Man1a2	Man1a2	Sv2b
Pla2g4a	Man2a1	Man2a1	Cdh1
Pla2g5	Mgat1	Mgat1	Fert2
Pla2g10	Mgat3	Mgat3	Ptprj
Pla2g2e	Rpn2	Rpn2	Sorbs1
Pla2g2f	St6gal1	St6gal1	Snai1
Pla2g6	Fut8	Fut8	Pvrl3
Cyp3a25	Alg2	Alg2	Wasf3
Pla2g12a	Dolpp1	Dolpp1	Lmo7
Pla2g12b	B4galt3	B4galt3	Tubb6
Cyp2c55	Mogs	Mogs	Adar
Cyp2c65	Alg5	Alg5	Spry1
Cyp2j9	Alg14	Alg14	Spry2
Pla2g4d	4933434I20Rik	4933434I20Rik	Spred2
Cyp2j11-ps	Mgat4c	Mgat4c	Cd9
Cyp2c50	Alg13	Alg13	Cr2
Cyp2c70	Stt3b	Stt3b	Cd247
Cyp2c44	Dpm3	Dpm3	Ifitm1
Cyp2j13	Tusc3	Tusc3	Pik3ap1
Pla2g3	Alg9	Alg9	Cldn4
Pla2g4e	Mgat4b	Mgat4b	Vcam1
Cyp3a44	Rpn1	Rpn1	Rassf5
Cyp2c54	Mgat5	Mgat5	Rapgef4
Cyp2c68	Man2a2	Man2a2	Jam3
Plb1	Alg11	Alg11	H2-Ab1
Fads2	Alg1	Alg1	Adrbk2
Gla	Alg3	Alg3	Scnn1a
Fut1	Mgat2	Mgat2	Myh9
Fut2	Alg12	Alg12	Pip4k2a
Fut9	Man1b1	Man1b1	Diap3
Naga	Dolk	Dolk	Iqgap2
St8sia1	Man1c1	Man1c1	Agrp
B3galnt1	St6gal2	St6gal2	Cpt1a
Sec1	Mgat5b	Mgat5b	Irs1
B3galt5	Mgat4a	Mgat4a	Adipor1
Gbgt1	Glt28d2	Glt28d2	Camkk2
A4galt	Alg10b	Alg10b	Dync1i1
Hagh	Alg8	Alg8	Nsf
Me1	Galnt1	Galnt1	Dync1li1
Mdh2	Galnt3	Galnt3	Aqp5
Mdh1	Galnt4	Galnt4	Slc12a2
Pcx	Gcnt1	Gcnt1	Kcnj16
Ldhd	St3gal1	St3gal1	Slc26a3
Acyp1	St3gal2	St3gal2	Cela2a
Haghl	St6galnac1	St6galnac1	Cpa2
Acot12	B4galt5	B4galt5	Tpcn2
Acyp2	C1galt1c1	C1galt1c1	Col14a1
Grhpr	Galntl5	Galntl5	Slc7a7
Acacb	Galnt14	Galnt14	Slc27a4
LOC100505264 /// Me2	Gcnt3	Gcnt3	Aqp8
Me3	Galntl2	Galntl2	Slc46a1
Glo1	C1galt1	C1galt1	Lrp1
Sucla2	Galnt2	Galnt2	Bace2
Suclg2	Galnt7	Galnt7	Uba7
Suclg1	Galntl1	Galntl1	Prph2
Mlycd	Galnt10	Galnt10	Slc1a2
Dhfr	Galnt6	Galnt6	Ncam1
Gart	Galnt12	Galnt12	Rhog
Mthfd2	Galnt11	Galnt11	Arhgap10
Mthfr	Galntl4	Galntl4	Arnt
Tyms	Galntl6	Galntl6	Runx1
Mtfmt	Galnt13	Galnt13	Dapk2
Aldh1l1	B3gnt6	B3gnt6	Epas1
Mthfs	Fut4	Fut4	Rb1
Atic	Fut7	Fut7	Ralgds
Mthfd1	Fut9	Fut9	H3f3b
Aldh1l2	Lfng	Lfng	Sgcb
Mthfd2l	Mfng	Mfng	Cdh2
Bst1	Rfng	Rfng	Setd1b
Cd38	St3gal3	St3gal3	Suv420h2
Nnmt	Plod3	Plod3	Acyp2
Nnt	Pomgnt1	Pomgnt1	Aldh1l1
Enpp1	Pofut2	Pofut2	Vnn1
Pnp	Chst10	Chst10	Gstt1
Nt5e	Pomt1	Pomt1	Mgst2
Nt5c	Ogt	Ogt	Eef1a2
Nampt	Pofut1	Pofut1	Eif1a
Nmnat1	Pomt2	Pomt2	Acin1
Qprt	Gxylt1	Gxylt1	Eif3h
Nudt12	Poglut1	Poglut1	Paip1
Nt5c1b	Gxylt2	Gxylt2	Eif2b5
Nmnat3	Glt25d1	Glt25d1	Upf2
Nt5c2	Glt25d2	Glt25d2	Msi1
Nadsyn1	B3galtl	B3galtl	Papola
Nt5m	Chst3	Chst3	Msi2
Nt5c3	Chst11	Chst11	Clp1
Nadk	Chst12	Chst12	Smg6
Enpp3	Chst7	Chst7	Etf1
BC016495	Chst13	Chst13	Cnot8
Nmnat2	Chst14	Chst14	Dcp1b
Vnn1	B3gat3	B3gat3	Taf6l
Dpys	Chpf	Chpf	Taf4a
Ppcdc	B3gat1	B3gat1	Srsf4
Coasy	Chst15	Chst15	Ctnnbl1
Pank2	Csgalnact2	Csgalnact2	Ccdc12
Pank1	Chsy3	Chsy3	Smndc1
Dpyd	Chpf2	Chpf2	Srsf9
Upb1	B3galt6	B3galt6	Psmb4
Ppcs	Dse	Dse	Psmd4
Pank3	Xylt2	Xylt2	Psma8
Pank4	B4galt7	B4galt7	Mnat1
Alpl	Csgalnact1	Csgalnact1	Prkdc
Akp3	Chsy1	Chsy1	Rhobtb1
Alppl2	B3gat2	B3gat2	Herc3
Fpgs	Ust	Ust	Cul5
Gch1	Ext1	Ext1	Ube2o
Ggh	Ext2	Ext2	Fbxw8
Pts	Hs3st1	Hs3st1	Ube2u
Spr	Hs3st3a1	Hs3st3a1	Mrc1
Alpi	Ndst1	Ndst1	Pex26
Qdpr	Ndst2	Ndst2	Nudt19
Cyp2b10	Hs2st1	Hs2st1	Dll1
Cyp2b13	Hs6st1	Hs6st1	Dll3
Cyp2b19	Hs6st2	Hs6st2	Kat2b
Cyp2b9	Hs6st3	Hs6st3	Dtx3
Cyp2f2	Extl3	Extl3	Epb4.1l2
Ephx1	Hs3st3b1	Hs3st3b1	Epb4.1l3
Gsta2	Extl1	Extl1	Magi1
Gsta3	Extl2	Extl2	Llgl1
Gsta4	Ndst4	Ndst4	Exoc4
Gstm1	Ndst3	Ndst3	Magi2
Gstm2	Glce	Glce	Igsf5
Gstm3	Hs3st2	Hs3st2	Magi3
Gstm4	Dgka	Dgka	Nln
Gstm5	Dgat1	Dgat1	Fbxl3
Gstm6	Gk2	Gk2	Pax4
Gstp1	Gpam	Gpam	Nr5a2
Gstt1	Gyk	Gyk
Gstt2	Lipc	Lipc
Gsto1	Lipg	Lipg
Gstz1	Lpl	Lpl
Mgst1	Pnliprp1	Pnliprp1
Mgst3	Pnliprp2	Pnliprp2
Gsto2	Ppap2a	Ppap2a
Gstm7	Mgll	Mgll
Dhdh	Agpat3	Agpat3
Cyp2s1	Ppap2c	Ppap2c
Gstk1	Agpat1	Agpat1
Mgst2	Dgke	Dgke
Cyp2a12	Aldh9a1	Aldh9a1
Cyp2d10	Akr1a4	Akr1a4
Cyp2d9	Mboat2	Mboat2
Fmo1	Agpat2	Agpat2
Fmo3	Lipf	Lipf
Fmo5	Dgat2	Dgat2
Fmo2	Ppap2b	Ppap2b
Cyp2d22	Agpat4	Agpat4
Cyp2d26	Pnlip	Pnlip
Fmo4	Agk	Agk
Csnk2a1	Agpat6	Agpat6
Csnk2a2	Dgkz	Dgkz
Csnk2b	Dgkg	Dgkg
Emg1	Dgkq	Dgkq
Eif6	Aldh7a1	Aldh7a1
Rasl2-9-ps	Pnpla3	Pnpla3
Tcof1	Gpat2	Gpat2
Cirh1a	Dgkb	Dgkb
Xrn1	Mboat1	Mboat1
Xrn2	Lclat1	Lclat1
Imp4	Dak	Dak
Gnl3	Dgkd	Dgkd
Nhp2	Agpat9	Agpat9
Nxf1	Glyctk	Glyctk
Rpp30	Dgki	Dgki
Nop58	Dgkh	Dgkh
Nxt1	Alox12	Alox12
Spata5	Alox12e	Alox12e
Rcl1	Alox12b	Alox12b
Pop4	Alox15	Alox15
Nop10	Alox8	Alox8
Sbds	Alox5	Alox5
Rexo1	Cbr1	Cbr1
Riok2	Cbr2	Cbr2
Nop56	Cyp2b10	Cyp2b10
Nvl	Cyp2b13	Cyp2b13
Nob1	Cyp2b19	Cyp2b19
Pop1	Cyp2b9	Cyp2b9
Mphosph10	Cyp2c29	Cyp2c29
Gar1	Cyp2c37	Cyp2c37
Rbm28	Cyp2c38	Cyp2c38
Gtpbp4	Cyp2c39	Cyp2c39
2810432D09Rik	Cyp2e1	Cyp2e1
Riok1	Cyp2j5	Cyp2j5
Wdr43	Cyp2j6	Cyp2j6
Utp14a	Cyp4a14	Cyp4a14
Wdr75	Ephx2	Ephx2
Pop7	Ggt1	Ggt1
Rrp7a	Gpx1	Gpx1
1700009N14Rik	Gpx2	Gpx2
Nxf2	Gpx3	Gpx3
Nmd3	Gpx5	Gpx5
Nat10	Lta4h	Lta4h
Mdn1	Ltc4s	Ltc4s
Eftud1	Pla2g1b	Pla2g1b
Imp3	Pla2g2a	Pla2g2a
Rpp25	Pla2g2c	Pla2g2c
Xpo1	Pla2g2d	Pla2g2d
Rexo2	Pla2g4a	Pla2g4a
Utp15	Pla2g5	Pla2g5
Taf9	Ptgds	Ptgds
Pwp2	Ptgis	Ptgis
Pop5	Ptgs1	Ptgs1
Nxf7	Ptgs2	Ptgs2
Utp14b	Tbxas1	Tbxas1
Rpp40	Ggt5	Ggt5
Tbl3	Pla2g10	Pla2g10
Bms1	Pla2g2e	Pla2g2e
Utp6	Pla2g2f	Pla2g2f
Utp18	Pla2g6	Pla2g6
Heatr1	Hpgds	Hpgds
Lsg1	Ptges	Ptges
Wdr36	Cyp4f14	Cyp4f14
Nol6	Pla2g12a	Pla2g12a
Gnl2	Gpx7	Gpx7
Nxt2	Gpx8	Gpx8
Dkc1	Pla2g12b	Pla2g12b
Nxf3	Cyp4f16	Cyp4f16
Wdr3	Cyp2u1	Cyp2u1
Eef1a1	Ggt6	Ggt6
Eef1a2	Cyp4f18	Cyp4f18
Eif1a	Cyp2c55	Cyp2c55
Eif2s1	Cyp2c65	Cyp2c65
Eif2b4	Cyp2j9	Cyp2j9
Eif3a	Gpx6	Gpx6
Eif4a1	Pla2g4d	Pla2g4d
Eif4a2	Ptges2	Ptges2
Eif4e	Cyp2j11-ps	Cyp2j11-ps
Eif4ebp1	Cyp4f15	Cyp4f15
Eif4g2	Cyp2c50	Cyp2c50
Kpnb1	Cbr3	Cbr3
Eif3e	Cyp4f13	Cyp4f13
Magoh	Ggt7	Ggt7
Nup50	Cyp2c70	Cyp2c70
Nup62	Cyp2c44	Cyp2c44
Pabpc1	Cyp2j13	Cyp2j13
Pabpc2	Pla2g3	Pla2g3
Pnn	Cyp4a12a	Cyp4a12a
Nup88	Pla2g4e	Pla2g4e
Ranbp2	Cyp2c54	Cyp2c54
Rangap1	Cyp2c68	Cyp2c68
Upf1	Plb1	Plb1
Rnps1	Cyp4a31	Cyp4a31
Smn1	Slc33a1	Slc33a1
Sumo3	B4galnt1	B4galnt1
Strap	Hexa	Hexa
Tacc3	Hexb	Hexb
Thoc4	St6galnac3	St6galnac3
Ube2i	St6galnac4	St6galnac4
Sumo1	St8sia1	St8sia1
Eif2s3x	St3gal5	St3gal5
Eif2s3y	St6galnac5	St6galnac5
Eif4e2	St6galnac6	St6galnac6
Prmt5	B3galt4	B3galt4
Eif3b	St8sia5	St8sia5
Srrm1	Hao1	Hao1
Eif3g	Mut	Mut
Bat1a	Hao2	Hao2
Ddx20	Pccb	Pccb
Nup210	Pgp	Pgp
Eif3i	Hyi	Hyi
Eif3d	Afmid	Afmid
Acin1	Mcee	Mcee
Eif3c	Grhpr	Grhpr
Phax	Acat1	Acat1
Nup160	Pcca	Pcca
Rbm8a	Acads	Acads
Snupn	Hadh	Hadh
Eif3f	Hmgcl	Hmgcl
Eif1ax	Hmgcs2	Hmgcs2
Sip1	Acsm3	Acsm3
Rae1	Oxct2a	Oxct2a
Upf3a	Oxct1	Oxct1
Rpp14	Bdh2	Bdh2
Eif2s2	Bdh1	Bdh1
Pabpc6	Ehhadh	Ehhadh
Rpp21	Aacs	Aacs
Ncbp2	Akr1c6	Akr1c6
Upf3b	Echs1	Echs1
Eif3h	Hadha	Hadha
Elac2	Acsm1	Acsm1
Eif1b	Hmgcs1	Hmgcs1
Nup35	L2hgdh	L2hgdh
Gemin7	Acsm2	Acsm2
Nup43	Acsm5	Acsm5
Trnt1	Alas1	Alas1
Nup205	Alas2	Alas2
4933411G06Rik	Cpox	Cpox
Nup93	Fech	Fech
Nupl1	Fth1	Fth1
Seh1l	Hccs	Hccs
Xpo5	Gm6453 /// Hmbs	Gm6453 /// Hmbs
Tmem48	Hmox1	Hmox1
Xpot	Hmox2	Hmox2
Thoc3	Alad	Alad
Eif4b	Ppox	Ppox
Senp2	Urod	Urod
Wibg	Uros	Uros
Pabpc5	Ears2	Ears2
Nup107	Ftmt	Ftmt
Thoc5	Cox10	Cox10
Pom121	Mmab	Mmab
Eif2b3	Eprs	Eprs
Tpr	Blvra	Blvra
Elac1	Cox15	Cox15
Tgs1	Blvrb	Blvrb
Nup155	Ggps1	Ggps1
Sumo2	Hmgcr	Hmgcr
Casc3	Mvk	Mvk
Pom121l2	Pdss1	Pdss1
Eif4g1	Dhdds	Dhdds
Eif2b1	Pmvk	Pmvk
Gemin5	Pdss2	Pdss2
Eif2b2	Fdps	Fdps
Eif5	Mvd	Mvd
Nup153	Idi1	Idi1
Paip1	Car8	Car8
Aaas	Car1	Car1
Eif2b5	Car2	Car2
Thoc1	Car3	Car3
Eif5b	Car4	Car4
Nup188	Car5a	Car5a
Nup214	Car6	Car6
Pabpc4	Car7	Car7
Eif4g3	Hal	Hal
Nupl2	Car5b	Car5b
AF366264	Car15 /// Dgcr2	Car15 /// Dgcr2
Nup133	Cth	Cth
Gemin8	Car9	Car9
Nup54	Hars	Hars
Nup98	Sars	Sars
Upf2	Wars	Wars
Thoc2	Farsb	Farsb
Thoc6	Cars	Cars
Ncbp1	Mtfmt	Mtfmt
Nup85	Fars2	Fars2
Gspt1	Yars2	Yars2
Gspt2	Nars	Nars
Msi1	Wars2	Wars2
Papola	Hars2	Hars2
Ppp2ca	Tars2	Tars2
Ppp2cb	Cars2	Cars2
Ppp2r3d	Sars2	Sars2
Ppp2r5d	Qars	Qars
Rngtt	Rars	Rars
Ppp2r5c	Yars	Yars
Ppp2r5e	Rars2	Rars2
Cpsf2	Tars	Tars
Ppp2r1a	Sepsecs	Sepsecs
Ppp2r2d	Mars2	Mars2
Cpsf4	Pstk	Pstk
Pabpn1	Mars	Mars
Cpsf3	Aars2	Aars2
Hbs1l	Dars	Dars
Papolb	Dars2	Dars2
Ppp2r3c	Pet112l	Pet112l
Fip1l1	Pars2	Pars2
Cstf1	Aars	Aars
Rnmt	Nars2	Nars2
Sympk	Tarsl2	Tarsl2
Nudt21	Gars	Gars
Dazap1	Cyp2a12	Cyp2a12
Ppp2r2a	Ces1c	Ces1c
Ppp2r2b	Ces1e	Ces1e
Ppp2r1b	Nat1	Nat1
Pcf11	Nat2	Nat2
Msi2	Nat3	Nat3
Cstf2t	Tk1	Tk1
Cpsf1	Tpmt	Tpmt
Clp1	Uck1	Uck1
Smg6	Umps	Umps
Pelo	Upp1	Upp1
Papolg	Tk2	Tk2
Etf1	Dpys	Dpys
Ppp2r5b	Ces5a	Ces5a
Smg7	Uckl1	Uckl1
Ppp2r5a	Cda	Cda
Cstf3	Ces2g	Ces2g
Smg5	Upp2	Upp2
Smg1	Uck2	Uck2
Ppp2r3a	Dpyd	Dpyd
Cpsf7	Upb1	Upb1
Ppp2r2c	Ces1d	Ces1d
Cpsf6	Ces2e	Ces2e
Btg1	Acox1	Acox1
Btg2	Scd1	Scd1
Ddx6	Scd2	Scd2
Hspd1	Acot1	Acot1
Hspa9	Scd3	Scd3
Cnot7	Elovl2	Elovl2
Tob1	Fads2	Fads2
Lsm2	Elovl5	Elovl5
Exosc5	Acot7	Acot7
Lsm4	Ptplb	Ptplb
Exosc9	Fads1	Fads1
Exosc10	Acox3	Acox3
Cnot4	Tecr	Tecr
Btg4	Pecr	Pecr
Tob2	Acaa1a	Acaa1a
C1d	Elovl6	Elovl6
Rqcd1	Acot2	Acot2
Wdr61	Acot3	Acot3
Exosc3	Acot4	Acot4
Exosc7	Acot5	Acot5
Exosc1	Acaa1b	Acaa1b
Lsm1	Aanat	Aanat
Lsm3	Acadl	Acadl
Mphosph6	Acadm	Acadm
Cnot8	Acadvl	Acadvl
Dcps	Adh1	Adh1
Exosc8	Adh7	Adh7
Dcp2	Adh5	Adh5
Pnpt1	Alpl	Alpl
Cnot2	Akp3	Akp3
Dhx36	Alppl2	Alppl2
Skiv2l2	Aldh3a1	Aldh3a1
Exosc6	Amd1	Amd1
Pan3	Mat1a	Mat1a
Dis3	Aoc3	Aoc3
Parn	Prdx6	Prdx6
Dcp1a	Aox1	Aox1
Naa38	Arg1	Arg1
Lsm6	Arg2	Arg2
Cnot10	Arsb	Arsb
Pan2	Asah1	Asah1
Cnot6	LOC100503191	LOC100503191
Skiv2l	Atp5b	Atp5b
Exosc4	Atp5c1	Atp5c1
Papd7	Atp5f1	Atp5f1
Ttc37	Atp5g1	Atp5g1
Exosc2	Atp5j	Atp5j
Cnot6l	Atp5k	Atp5k
Cnot3	Atp6v1a	Atp6v1a
Edc4	Atp6v1b2	Atp6v1b2
Dcp1b	Atp6v0d1	Atp6v0d1
Zcchc7	Atp6v1e1	Atp6v1e1
Edc3	Atp6v0e	Atp6v0e
Gtf2h1	Atp6v0a1	Atp6v0a1
Gtf2h4	Atp6v0c	Atp6v0c
Gtf2i	Auh	Auh
Taf6	Bckdha	Bckdha
Tbp	Bckdhb	Bckdhb
Gtf2h2	Bhmt	Bhmt
Taf7	Bst1	Bst1
Taf10	Bpgm	Bpgm
Gtf2ird1	Cat	Cat
Taf12	Cbs	Cbs
Gtf2e2	Cd38	Cd38
Gtf2f2	Cdo1	Cdo1
Taf11	Chkb	Chkb
Gtf2a1l	Chka	Chka
Taf4b	Ckb	Ckb
Gtf2e1	Ckm	Ckm
Taf7l	Ckmt1	Ckmt1
Ston1	Cmas	Cmas
Gtf2a1	Coq7	Coq7
Gtf2f1	Cox17	Cox17
Taf13	Cox4i1	Cox4i1
Taf5l	Cox5a	Cox5a
Gtf2h3	Cox5b	Cox5b
Taf6l	Cox6a1	Cox6a1
Taf5	Cox6a2	Cox6a2
Taf4a	Cox8b	Cox8b
Gtf2b	Pcyt1a	Pcyt1a
Tbpl1	Cyp1a2	Cyp1a2
Taf1	Dao	Dao
Taf2	Dbh	Dbh
Taf9b	Dbt	Dbt
Fen1	Dct	Dct
Lig1	Ddc	Ddc
Mcm3	Degs1	Degs1
Mcm2	Dhfr	Dhfr
Mcm4	Dnmt1	Dnmt1
Mcm5	Trdmt1	Trdmt1
Mcm6	Dnmt3a	Dnmt3a
Mcm7	Dnmt3b	Dnmt3b
Pcna	Eno1 /// Gm5506 /// LOC100503183	Eno1 /// Gm5506 /// LOC100503183
Pola1	Eno2	Eno2
Pola2	Eno3	Eno3
Pold1	Acsl1	Acsl1
Pold2	Fah	Fah
Pole	Fasn	Fasn
Prim1	Fpgs	Fpgs
Prim2	Ftcd	Ftcd
Rfc1	Fut1	Fut1
Rfc2	Fut2	Fut2
Rnaseh1	Galc	Galc
Rpa2	Gamt	Gamt
Rnaseh2b	Gapdhs	Gapdhs
Pold3	Gba	Gba
Rnaseh2c	Gch1	Gch1
Rpa3	Gcnt2	Gcnt2
Rpa1	Gclc	Gclc
Rfc3	Gclm	Gclm
Rnaseh2a	Gpaa1	Gpaa1
Pold4	Pigq	Pigq
Rfc5	Gss	Gss
Rfc4	Gstz1	Gstz1
Dna2	Hsd17b10	Hsd17b10
Ssbp1	Hdc	Hdc
Aqr	Hgd	Hgd
Dhx15	Hpse	Hpse
Ddx5	Hpd	Hpd
Srsf10	Hyal2	Hyal2
Hnrnpc	Ido1	Ido1
Hnrnpa1	Ids	Ids
Hnrnpk	Idua	Idua
Hspa8	Inpp1	Inpp1
Hspa1l	Inpp5b	Inpp5b
Hspa1b	Inppl1	Inppl1
Hspa2	Khk	Khk
Rbmx	Anpep	Anpep
Sf3a2	Ldha	Ldha
Sart1	Ldhb	Ldhb
Srsf2	Ldhc	Ldhc
Srsf3	Maoa	Maoa
Srsf5	Rdh11	Rdh11
Eftud2	Me1	Me1
Snrpc	Gm4076 /// ND5	Gm4076 /// ND5
Snrnp70	Mthfd2	Mthfd2
Snrpb	Mthfr	Mthfr
Snrpb2	Ndufa2	Ndufa2
Snrpe	Ndufa4	Ndufa4
U2af2	Ndufs4	Ndufs4
Pcbp1	Ndufv1	Ndufv1
Cherp	Nnmt	Nnmt
Prpf19	Nnt	Nnt
Usp39	Nos1	Nos1
Hnrnpu	Nos2	Nos2
Plrg1	Nos3	Nos3
Prpf40b	Oat	Oat
LOC631302 /// Pqbp1	Odc1	Odc1
Ppie	Otc	Otc
Tcerg1	P4ha1	P4ha1
Prpf40a	P4ha2	P4ha2
Srsf4	Pafah1b1	Pafah1b1
Isy1	Pafah1b2	Pafah1b2
Wbp11	Pafah1b3	Pafah1b3
Dhx38	Pah	Pah
0610009D07Rik	Pemt	Pemt
Cwc15	Pgam1	Pgam1
Sf3b5	Pgk1	Pgk1
Snw1	Pgk2	Pgk2
Zmat2	Piga	Piga
Snrnp40	Pigf	Pigf
Snrnp27	Pik3c2a	Pik3c2a
Ctnnbl1	Pik3c2g	Pik3c2g
Rbm22	Pip5k1c	Pip5k1c
Crnkl1	Pip5k1b	Pip5k1b
Prpf38b	Pip5k1a	Pip5k1a
Rbm25	Plcb1	Plcb1
Prpf18	Plcb2	Plcb2
Snrpd3	Plcb3	Plcb3
Xab2	Plcb4	Plcb4
Sf3a1	Plcd1	Plcd1
2610101N10Rik	Plcd4	Plcd4
Puf60	Plcg1	Plcg1
Srsf6	Pld1	Pld1
Snrpg	Pld2	Pld2
Bcas2	Pnmt	Pnmt
Phf5a	Polg	Polg
Syf2	Pon1	Pon1
Ppil1	Inpp5k	Inpp5k
Prpf6	Ppt1	Ppt1
Snrpa1	Prodh	Prodh
Prpf31	Pipox	Pipox
Dhx16	Ptdss1	Ptdss1
Snrpf	Pts	Pts
Prpf4	Aldh1a2	Aldh1a2
Prpf3	Rdh16	Rdh16
Cdc5l	Rev3l	Rev3l
Cdc40	Dhrs3	Dhrs3
Ddx42	Sat1	Sat1
Ccdc12	Sord	Sord
Ddx23	Sgpl1	Sgpl1
Sf3a3	Shmt1	Shmt1
Smndc1	St3gal4	St3gal4
Hnrnpm	Smpd1	Smpd1
Rbm17	Smpd2	Smpd2
Sf3b1	Spam1	Spam1
Tra2a	Spr	Spr
Sf3b3	Sephs2	Sephs2
Snrpd2	Sptlc2	Sptlc2
Sf3b4	Srm	Srm
Srsf9	Synj2	Synj2
U2af1	Th	Th
Prpf8	Atp6v0a2	Atp6v0a2
Slu7	Dtymk	Dtymk
Hspa1a	Tph1	Tph1
Ddx46	Tpi1	Tpi1
Dhx8	Tpo	Tpo
Srsf7	Tst	Tst
Hnrnpa3	Tsta3	Tsta3
Prpf38a	Cmpk2	Cmpk2
Sf3b2	Tyms	Tyms
Snrnp200	Tyr	Tyr
Ifng	Tyrp1	Tyrp1
Psmb9	Ugcg	Ugcg
Psmb8	Ugt8a	Ugt8a
Psmd7	Uqcrq	Uqcrq
Psma2	Uqcrc1	Uqcrc1
Psma3	Bpnt1 /// LOC100504952	Bpnt1 /// LOC100504952
Psmb1	Aadat	Aadat
Psmb4	Aldh1a7	Aldh1a7
Psmb5	Btd	Btd
Psmb6	Gnpda1	Gnpda1
Psmb7	Adh4	Adh4
Psmc1	B3galt1	B3galt1
Psmc2	B3galt2	B3galt2
Psmc3	B3galnt1	B3galnt1
Psmc5	Mecr	Mecr
Psmd4	Sgsh	Sgsh
Psme1	Tcirg1	Tcirg1
Psme2	Pla2g7	Pla2g7
Psme3	Ptdss2	Ptdss2
Shfm1	Pign	Pign
Psmd2	Pdhx	Pdhx
Psmd3	Naglu	Naglu
Psmc4	Atp5l /// Gm10221	Atp5l /// Gm10221
Psmd13	Ept1	Ept1
Psma1	Dhrs4	Dhrs4
Psma4	Tpk1	Tpk1
Gm8394 /// Psma5	Pmm1	Pmm1
Psma6	Aass	Aass
Psma7	Polg2	Polg2
Psmb2	Acsl4	Acsl4
Psmb3	Gne	Gne
Psmd8	Scly	Scly
Psmd14	Acaa2	Acaa2
Psmd6	Cdipt	Cdipt
Pomp	Gal3st1	Gal3st1
Psmd12	Pmm2	Pmm2
Psmc6	Rfk	Rfk
Psmd11	Ppt2	Ppt2
Psma8	Ndufa1	Ndufa1
Psme4	Atp6ap1	Atp6ap1
Psmf1	Dnmt3l	Dnmt3l
Cdk7	Asah2	Asah2
Ddb1	St3gal6	St3gal6
Ercc1	Ctps2	Ctps2
Ercc2	Impa1	Impa1
Ercc3	Pigb	Pigb
Mnat1	Pgam2	Pgam2
Rad23a	Pigp	Pigp
Rad23b	Prodh2	Prodh2
Xpa	Ivd	Ivd
Xpc	Apip	Apip
Ercc5	B4galt4	B4galt4
Cetn2	B4galt6	B4galt6
Ercc4	Aldh18a1	Aldh18a1
Rbx1	Sec1	Sec1
Gtf2h5	Sphk2	Sphk2
Ccnh	Mlycd	Mlycd
Ercc8	Pigo	Pigo
Cul4b	Tdo2	Tdo2
Cul4a	Dhodh	Dhodh
Ddb2	Aldh1a3	Aldh1a3
Ercc6	Pdxp	Pdxp
Mlh1	Atp5j2	Atp5j2
Msh2	Hibadh	Hibadh
Msh3	Smpd3	Smpd3
Msh6	Acss2	Acss2
Pms2	Bcmo1	Bcmo1
Exo1	Inpp5e	Inpp5e
Mlh3	Atp5d	Atp5d
Blm	Ndufb5	Ndufb5
Brca2	Ndufa3	Ndufa3
Mre11a	Ndufa9	Ndufa9
Rad50	Atp6v1f	Atp6v1f
Rad51	Pycrl	Pycrl
Rad52	Ndufb9	Ndufb9
Rad54l	Atp6v1g2	Atp6v1g2
Top3a	Pigyl	Pigyl
Top3b	Atp6v1g1	Atp6v1g1
Nbn	Atp6v1c1	Atp6v1c1
Xrcc2	Ndufc1	Ndufc1
Mus81	Ndufa7	Ndufa7
Xrcc3	Cyc1	Cyc1
Eme1	Nmnat1	Nmnat1
Rad54b	Ndufb3	Ndufb3
Xrcc6	Uqcrh	Uqcrh
Prkdc	Crls1	Crls1
Dntt	Cmpk1	Cmpk1
Xrcc5	Uqcr11	Uqcr11
Polm	Uqcrfs1	Uqcrfs1
Poll	Ppcdc	Ppcdc
Nhej1	Acadsb	Acadsb
Dclre1c	Mtap	Mtap
Lig4	Ndufb7	Ndufb7
Dgka	Acad8	Acad8
Inpp5d	Trit1	Trit1
Itpr1	Lap3	Lap3
Itpr2	Uqcrc2	Uqcrc2
Itpr3	Pi4k2b	Pi4k2b
Pik3r1	Gatm	Gatm
Pik3r2	Atp5e	Atp5e
Pik3r3	Ndufa6	Ndufa6
Prkca	Lipt2	Lipt2
Prkcb	Ndufb8	Ndufb8
Prkcc	Ndufa10	Ndufa10
Dgke	Pigc	Pigc
Calml3	Nanp	Nanp
Cds1	Qprt	Qprt
Calm4	Uqcrb	Uqcrb
Dgkz	Pigm	Pigm
Dgkg	Aldh3b1	Aldh3b1
Dgkq	Mri1	Mri1
Cds2	Atp5g2	Atp5g2
Dgkb	Gnpda2	Gnpda2
Dgkd	Ndufb4	Ndufb4
Dgki	Ndufc2	Ndufc2
Pik3r5	Ndufb2	Ndufb2
Dgkh	Ndufa5	Ndufa5
Aire	Ndufb10	Ndufb10
Birc3	Ndufs3	Ndufs3
Birc2	Ndufa8	Ndufa8
Xiap	Pcyt2	Pcyt2
Brca1	Acss1	Acss1
Btrc	Atp6v1c2	Atp6v1c2
Cbl	Pycr2	Pycr2
Socs3	Gmppa	Gmppa
Socs1	Sat2	Sat2
Trip12	Cmbl	Cmbl
Herc2	Cox11	Cox11
Itch	Degs2	Degs2
Anapc1	Ccbl1	Ccbl1
Mgrn1	Ndufab1	Ndufab1
Mdm2	Kdsr	Kdsr
Mid1	Kynu	Kynu
Pias2	Oxsm	Oxsm
Nedd4	Atp5h	Atp5h
Pml	Coasy	Coasy
Siah1a	Amdhd1	Amdhd1
Skp1a	Tha1	Tha1
Traf6	Isyna1	Isyna1
Ube2m	Coq2	Coq2
Ube2e3	Mccc1	Mccc1
Uba3	Pigx	Pigx
Uba1	Adpgk	Adpgk
Ube1y1	B3gnt3	B3gnt3
Ube2a	Plcd3	Plcd3
Ube2b	Ndufv2	Ndufv2
Ube2g2	Phospho2	Phospho2
Ube2h	Atp6v1d	Atp6v1d
Ube3a	Plce1	Plce1
Vhl	Nmnat3	Nmnat3
Rfwd2	Dmgdh	Dmgdh
Map3k1	Acsl3	Acsl3
Cul3	Ahcyl2	Ahcyl2
Cul1	Hyal6	Hyal6
Skp2	Sgms2	Sgms2
Fbxw7	Pank2	Pank2
Keap1	Pgs1	Pgs1
Park2	Hyal5	Hyal5
Uba2	Cds1	Cds1
Anapc4	Atp6v1e2	Atp6v1e2
Cdc23	Etnk1	Etnk1
Ube2k	Ndufs7	Ndufs7
Ube2j1	Fpgt	Fpgt
Anapc7	Gns	Gns
Fzr1	Ippk	Ippk
Stub1	Pank1	Pank1
Sae1	Agmat	Agmat
Pias1	Atp6v0e2	Atp6v0e2
Ube2d2	Tgds	Tgds
Ube2l6	Ckmt2	Ckmt2
Pias4	Alpi	Alpi
Anapc5	Hyal4	Hyal4
Huwe1	Smpd4	Smpd4
Ube4b	Rdh12	Rdh12
Ppil2	Mccc2	Mccc2
Ube2d3	Cox7b2	Cox7b2
Anapc11	Ndufv3	Ndufv3
Smurf2	Nadsyn1	Nadsyn1
Cdc26	Pigt	Pigt
Cul7	Lias	Lias
Ube2w	Abo	Abo
Wwp2	Pi4k2a	Pi4k2a
Fancl	Cox4i2	Cox4i2
Ube2g1	B3galt5	B3galt5
Herc4	Nans	Nans
Klhl13	Kmo	Kmo
Ube2r2	Rdh10	Rdh10
Tceb2	Lpcat4	Lpcat4
Ube2f	Olah	Olah
Tceb1	Cept1	Cept1
Rchy1	Pafah2	Pafah2
Ube2c	Psph	Psph
Trim37	Acacb	Acacb
Anapc10	Pnpo	Pnpo
Anapc13	Synj1	Synj1
Rhobtb1	Gldc	Gldc
Trim32	Aldh6a1	Aldh6a1
Cdc16	Adi1	Adi1
Ube2q1	Thtpa	Thtpa
Ubr5	Ldhal6b	Ldhal6b
Cul2	Ppcs	Ppcs
Herc3	Pi4kb	Pi4kb
Syvn1	LOC640502 /// Uap1	LOC640502 /// Uap1
Uba7	Haao	Haao
Cul5	Mthfs	Mthfs
Smurf1	Shmt2	Shmt2
Det1	B3gnt5	B3gnt5
Ube2ql1	Mthfd1	Mthfd1
Ube2s	Mat2b	Mat2b
Anapc2	Atp6v1h	Atp6v1h
Ube3c	B3gnt1	B3gnt1
Fbxw11	Sephs1	Sephs1
Nhlrc1	Me3	Me3
Fbxo4	Acy1	Acy1
Wwp1	Hyal3	Hyal3
Cdc20	Maob	Maob
Ube2q2	Dut	Dut
Ube3b	Mpi	Mpi
Ube2j2	Cox6b1	Cox6b1
Ubox5	Qdpr	Qdpr
Ube4a	Pigh	Pigh
Ube2d1	Cds2	Cds2
Cdc34	Atp6v1b1	Atp6v1b1
Cdc27	Hlcs	Hlcs
Ube2o	Atp6v0b	Atp6v0b
Ube2e2	Impa2	Impa2
Pias3	Plcz1	Plcz1
Fbxo2	Atp6v0a4	Atp6v0a4
Uba6	Inpp5j	Inpp5j
Fbxw8	Acer1	Acer1
Herc1	Sardh	Sardh
Klhl9	Nadk	Nadk
Rhobtb2	Sgms1	Sgms1
Ube2z	Pycr1	Pycr1
Ube2u	Ido2	Ido2
Actb	Lpcat1	Lpcat1
Actg1	Pank3	Pank3
Atp6v1a	Ado	Ado
Atp6v1b2	Inpp5a	Inpp5a
Atp6v0d1	Chpt1	Chpt1
Atp6v1e1	Etnk2	Etnk2
Atp6v0e	Pdxk	Pdxk
Atp6v0a1	Tph2	Tph2
Atp6v0c	Acsl6	Acsl6
Calr	Nags	Nags
Canx	Coq6	Coq6
Cd14	Itpk1	Itpk1
Cd36	Gmds	Gmds
Coro1a	Mcat	Mcat
Comp	Pi4ka	Pi4ka
Ctsl	Pik3c3	Pik3c3
Ctss	Ndufs8	Ndufs8
Cyba	Nmnat2	Nmnat2
Cybb	Ndufs2	Ndufs2
Dync1h1	Hibch	Hibch
Dync1i1	Ndufs1	Ndufs1
Dync1i2	Uap1l1	Uap1l1
Fcgr1	Gbgt1	Gbgt1
Fcgr2b	Pip5kl1	Pip5kl1
Fcgr3	Atp5g3	Atp5g3
H2-Aa	Agps	Agps
H2-Ab1	Itpka	Itpka
H2-Bl	Sptlc3	Sptlc3
H2-D1 /// H2-L	Pigu	Pigu
H2-Eb1	Ahcyl1	Ahcyl1
H2-L	Ccbl2	Ccbl2
H2-M10.1	Coq3	Coq3
H2-M3	Ndufb6	Ndufb6
H2-M9	Acer2	Acer2
H2-DMa	Pigv	Pigv
H2-DMb2	Hadhb	Hadhb
H2-Oa	Sds	Sds
H2-Ob	B3gnt4	B3gnt4
H2-Q10	Mat2a	Mat2a
H2-T24	Inpp4b	Inpp4b
H2-D1	Tat	Tat
Hgs	Fuk	Fuk
Itga2	Plcg2	Plcg2
Itga5	Phgdh	Phgdh
Itgam	Pcyt1b	Pcyt1b
Itgav	Mtr	Mtr
Itgb1	A4galt	A4galt
Itgb2	LOC100504348	LOC100504348
Itgb3	Atp6v0d2	Atp6v0d2
Itgb5	Adc	Adc
Lamp1	Uroc1	Uroc1
Lamp2	Mpst	Mpst
M6pr	Csad	Csad
Marco	Sptlc1	Sptlc1
Mbl1	Gulo	Gulo
Mbl2	Inpp4a	Inpp4a
Mpo	Ahcy	Ahcy
Mrc1	Pank4	Pank4
Mrc2	Pon3	Pon3
Ncf1	Gcdh	Gcdh
Ncf2	Lpcat2	Lpcat2
Ncf4	Mthfd1l	Mthfd1l
Nos1	Pigs	Pigs
Pla2r1	Itpkb	Itpkb
Rab5b	P4ha3	P4ha3
Rab5c	Ocrl	Ocrl
Rab7	Dctd	Dctd
Rac1	Pisd	Pisd
Msr1	Pigl	Pigl
Sec22b	Acsbg2	Acsbg2
Sftpa1	Lcmt2	Lcmt2
Sftpd	Pigk	Pigk
Scarb1	Pon2	Pon2
Tap1	Ndufa4l2	Ndufa4l2
Tap2	Acsl5	Acsl5
Thbs1	9130409I23Rik	9130409I23Rik
Thbs2	Lipt1	Lipt1
Thbs3	Mthfd2l	Mthfd2l
Thbs4	Abca1	Abca1
Atp6v0a2	Abca4	Abca4
Tlr4	Abca2	Abca2
Tlr6	Abcb7	Abcb7
Tfrc	Abcg1	Abcg1
Tuba1a	Abcd1	Abcd1
Tuba4a	Cftr	Cftr
Tubb2a	Abcc2	Abcc2
Tubb3	Abcc1	Abcc1
Tubb4	Abcb1b	Abcb1b
Tubb5	Abcb4	Abcb4
Vamp3	Abcb1a	Abcb1a
Tlr2	Abcd3	Abcd3
Tcirg1	Abcd4	Abcd4
C1ra	Abcc8	Abcc8
Stx7	Abcc9	Abcc9
Sec61a1	Tap1	Tap1
Tuba8	Tap2	Tap2
Atp6ap1	Abcg2	Abcg2
Clec7a	Abcd2	Abcd2
Sec61a2	Abca7	Abca7
Atp6v1f	Abca8b	Abca8b
Sec61b	Abcg3	Abcg3
Atp6v1g2	Abcg5	Abcg5
Atp6v1g1	Abca3	Abca3
Atp6v1c1	Abcb11	Abcb11
Tubb6	Abcc5	Abcc5
Atp6v1c2	Abcc6	Abcc6
Cd209f	Abcb10	Abcb10
Cd209b	Abcb9	Abcb9
Cd209g	Abcg8	Abcg8
Stx18	Abcb6	Abcb6
Colec11	Abcb8	Abcb8
Tubb2b	Abca6	Abca6
Atp6v1d	Abcc3	Abcc3
Atp6v1e2	Abcg4	Abcg4
Stx12	Abca8a	Abca8a
Colec12	Abca9	Abca9
Cd209c	Abca5	Abca5
Cd209d	Abcc4	Abcc4
Cd209e	Rplp0	Rplp0
Cd209a	Fau	Fau
Eea1	Rps2	Rps2
5430435G22Rik	Rpl10a	Rpl10a
Tubb2c	Rpl18	Rpl18
Dync1li2	Rpl26	Rpl26
Dync1li1	Rpl27	Rpl27
Atp6v0d2	Rpl37a	Rpl37a
Fcgr4	Rpl6	Rpl6
Rab5a	Rpl7	Rpl7
Rilp	Rpl9	Rpl9
Tubb1	Rps14	Rps14
Abcd1	Rps16	Rps16
Baat	Rps17	Rps17
Crat	Rps18	Rps18
Ephx2	Rps19	Rps19
Gnpat	Gm10119 /// Gm9000 /// Rps3a	Gm10119 /// Gm9000 /// Rps3a
Hao1	Rps4x	Rps4x
Hsd17b4	Rps5	Rps5
Idh1	Rps6	Rps6
Phyh	Rps7	Rps7
Amacr	Rpl13a	Rpl13a
Mpv17	Uba52	Uba52
Mvk	Gm7536	Gm7536
Nos2	Rpl8	Rpl8
Pex11a	Rps3	Rps3
Pex11b	Rps11	Rps11
Pex16	Rpl3l	Rpl3l
Pex7	Gm10269 /// Rpl35	Gm10269 /// Rpl35
Pex19	Rpl11	Rpl11
Abcd3	Rps10	Rps10
Abcd4	Rpl14	Rpl14
Pxmp2	Rplp2	Rplp2
Pxmp3	LOC100503815 /// LOC100504784 /// Rpl39	LOC100503815 /// LOC100504784 /// Rpl39
Pex5	Rpl38	Rpl38
Scp2	Rpl4	Rpl4
Slc25a17	Rpl22l1	Rpl22l1
Sod1	Rpl39l	Rpl39l
Sod2	Rps9	Rps9
Xdh	Rsl24d1	Rsl24d1
Decr2	Rpl17	Rpl17
Slc27a2	Hspa5	Hspa5
Abcd2	Srprb	Srprb
Dhrs4	Srp9	Srp9
Ech1	Sec61a1	Sec61a1
Prdx5	Sec11a	Sec11a
Hao2	Sec61a2	Sec61a2
Pex14	Sec61b	Sec61b
Pex3	Sec11c	Sec11c
Hacl1	Srp19	Srp19
Pxmp4	Immp1l	Immp1l
Far1	Spcs2	Spcs2
Pmvk	Srp72	Srp72
Pex11c	Spcs1	Spcs1
Ddo	Oxa1l	Oxa1l
Pex1	Sec62	Sec62
Pex13	Spcs3	Spcs3
Pex26	Immp2l	Immp2l
Crot	Sec63	Sec63
Acox2	Srp68	Srp68
Mpv17l	Srp54b	Srp54b
Pex12	Akt1	Akt1
Nudt19	Akt2	Akt2
Pecr	Atf4	Atf4
Acot8	Bdnf	Bdnf
Paox	Cacna1a	Cacna1a
Pex6	Cacna1b	Cacna1b
Agps	Cacna1c	Cacna1c
Idh2	Cacna1d	Cacna1d
Far2	Cacna1e	Cacna1e
Pex10	Cacna1g	Cacna1g
Adam17	Cacna1s	Cacna1s
Crebbp	Cacna2d1	Cacna2d1
Ctbp1	Cacna2d3	Cacna2d3
Ctbp2	Cacnb1	Cacnb1
Dll1	Cacnb2	Cacnb2
Dll3	Cacnb3	Cacnb3
Dvl1	Cacnb4	Cacnb4
Dvl2	Cacng1	Cacng1
Dvl3	Cacng2	Cacng2
Dtx1	Casp3	Casp3
Kat2a	Cd14	Cd14
Hdac2	Cdc25b	Cdc25b
Hes1	Cdc42	Cdc42
Hes5	Chuk	Chuk
Jag1	Crk	Crk
Jag2	Crkl	Crkl
Lfng	Daxx	Daxx
Mfng	Gadd45a	Gadd45a
Notch1	Ddit3	Ddit3
Notch2	Dusp2	Dusp2
Notch3	Egf	Egf
Notch4	Egfr	Egfr
Numb	Elk1	Elk1
Kat2b	Elk4	Elk4
Psen1	Mecom	Mecom
Psen2	Fas	Fas
Ptcra	Fasl	Fasl
Rbpj	Fgf1	Fgf1
Rfng	Fgf10	Fgf10
Ncor2	Fgf11	Fgf11
Dll4	Fgf12	Fgf12
Ncstn	Fgf13	Fgf13
Psenen	Fgf14	Fgf14
Cir1	Fgf15	Fgf15
Dtx2	Fgf17	Fgf17
Dtx3	Fgf18	Fgf18
Maml1	Fgf2	Fgf2
Dtx4	Fgf3	Fgf3
Aph1b	Fgf4	Fgf4
Aph1a	Fgf5	Fgf5
Hdac1	Fgf6	Fgf6
Actn2	Fgf7	Fgf7
Actn3	Fgf8	Fgf8
Akt1	Fgf9	Fgf9
Akt2	Fgfr1	Fgfr1
Rhoa	Fgfr2	Fgfr2
Cask	Fgfr3	Fgfr3
Ctnna1	Fgfr4	Fgfr4
Ctnna2	Fos	Fos
Ctnnb1	Gna12	Gna12
Cdc42	Gng12	Gng12
Inadl	Grb2	Grb2
Cldn1	Nr4a1	Nr4a1
Cldn2	Hras1	Hras1
Cldn3	Hspa8	Hspa8
Cldn4	Hspa1l	Hspa1l
Cldn5	Hspb1	Hspb1
Cttn	Hspa1b	Hspa1b
Epb4.1l1	Hspa2	Hspa2
Epb4.1l2	Ikbkb	Ikbkb
Epb4.1l3	Ikbkg	Ikbkg
Gnai1	Il1a	Il1a
Gnai2	Il1b	Il1b
Gnai3	Il1r1	Il1r1
Magi1	Il1r2	Il1r2
Hcls1	Jun	Jun
Hras1	Jund	Jund
F11r	Kras	Kras
Kras	Stmn1	Stmn1
Llgl1	Mapkapk2	Mapkapk2
Mllt4	Mapkapk5	Mapkapk5
Mpdz	Max	Max
Mras	Mef2c	Mef2c
Myh1	Mknk1	Mknk1
Myh2	Mknk2	Mknk2
Myh3	Mos	Mos
Myh4	Mras	Mras
Myh9	Mapt	Mapt
Myl7	Myc	Myc
Myl2	Gadd45b	Gadd45b
Mylpf	Nf1	Nf1
Nras	Nfatc2	Nfatc2
Ocln	Nfkb1	Nfkb1
Prkcd	Nfkb2	Nfkb2
Prkce	Ngf	Ngf
Prkch	Nlk	Nlk
Prkci	Nras	Nras
Prkcq	Ntf3	Ntf3
Prkcz	Ntrk1	Ntrk1
Rras	Ntrk2	Ntrk2
Exoc4	Dusp8	Dusp8
Spnb2	Pak1	Pak1
Src	Pdgfa	Pdgfa
Tjp1	Pdgfb	Pdgfb
Tjp2	Pdgfra	Pdgfra
Yes1	Pdgfrb	Pdgfrb
Akt3	Prkaca	Prkaca
Tjp3	Prkacb	Prkacb
Vapa	Prkca	Prkca
Magi2	Prkcb	Prkcb
Cldn7	Prkcc	Prkcc
Cldn6	Ppm1a	Ppm1a
Cldn8	Ppm1b	Ppm1b
Mpp5	Ppp3ca	Ppp3ca
Csda	Ppp3cb	Ppp3cb
Pard6a	Ppp3cc	Ppp3cc
Cldn9	Ppp3r1	Ppp3r1
Pard6b	Ppp3r2	Ppp3r2
Myl10	Ppp5c	Ppp5c
Actn4	Mapk11	Mapk11
B230120H23Rik	Mapk8ip1	Mapk8ip1
2900073G15Rik	Prkx	Prkx
Jam2	Dusp1	Dusp1
Myl12b	Ptpn5	Ptpn5
Rab13	Ptprr	Ptprr
Rab3b	Rac1	Rac1
Cgn	Rac2	Rac2
Igsf5	Rasgrp2	Rasgrp2
4930412D23Rik	Rasgrf1	Rasgrf1
Tjap1	Rasgrf2	Rasgrf2
4930468A15Rik	Rasgrp1	Rasgrp1
Amotl1	Rela	Rela
Jam3	Relb	Relb
Pard6g	Rras	Rras
Pard3	Sos1	Sos1
Myl9	Sos2	Sos2
Magi3	Srf	Srf
Actn1	Tgfb1	Tgfb1
Myh7	Tgfb2	Tgfb2
Exoc3	Tgfb3	Tgfb3
Ctnna3	Tgfbr1	Tgfbr1
Llgl2	Tgfbr2	Tgfbr2
Crb3	Tnf	Tnf
B2m	Tnfrsf1a	Tnfrsf1a
Ciita	Traf2	Traf2
Cd4	Traf6	Traf6
Cd8a	Trp53	Trp53
Cd8b1	Akt3	Akt3
Creb1	Gadd45g	Gadd45g
Ctsb	Map2k5	Map2k5
Pdia3	Mapk7	Mapk7
Hspa5	Map2k1	Map2k1
Hsp90ab1	Map2k2	Map2k2
Hsp90aa1	Map2k3	Map2k3
Hspa4	Map2k4	Map2k4
Cd74	Map2k6	Map2k6
Klrc1	Map2k7	Map2k7
Klrc2	Map3k1	Map3k1
Klrd1	Map3k11	Map3k11
Nfya	Map3k12	Map3k12
Nfyb	Map3k2	Map3k2
Nfyc	Map3k3	Map3k3
Lgmn	Map3k4	Map3k4
Rfxank	Map3k5	Map3k5
Tapbp	Map3k7	Map3k7
Tnf	Map3k8	Map3k8
Klrc3	Map4k1	Map4k1
Ifi30	Map4k2	Map4k2
Rfxap	Mapk1	Mapk1
Ace	Mapk10	Mapk10
Agt	Mapk13	Mapk13
Agtr1a	Mapk14	Mapk14
Agtr1b	Mapk3	Mapk3
Agtr2	Mapk8	Mapk8
Cpa3	Mapk9	Mapk9
Ctsg	Map4k4	Map4k4
Enpep	Ecsit	Ecsit
Anpep	Mapk12	Mapk12
Mas1	Mapk8ip3	Mapk8ip3
Cma1	Map3k6	Map3k6
Mme	Map3k14	Map3k14
Ctsa	Cacng3	Cacng3
Thop1	Cacng4	Cacng4
Ace2	Cacng6	Cacng6
Nln	Cacna1f	Cacna1f
Lnpep	Stk3	Stk3
Casp1	Dusp14	Dusp14
Casp8	Cacna2d2	Cacna2d2
Chuk	Cacna1h	Cacna1h
Cxcl1	Stk4	Stk4
Ikbkb	Mapk8ip2	Mapk8ip2
Ikbkg	Dusp10	Dusp10
Il18	Fgf23	Fgf23
Il1b	B230120H23Rik	B230120H23Rik
Il6	Tab1	Tab1
Naip1	Rras2	Rras2
Naip2	Fgf22	Fgf22
Naip5	Dusp6	Dusp6
Nfkb1	Tab2	Tab2
Nfkbia	Flnc	Flnc
Nfkbib	2010110P09Rik	2010110P09Rik
Mapk11	Dusp16	Dusp16
Pstpip1	Dusp3	Dusp3
Rela	Nfatc4	Nfatc4
Ccl5	Dusp9	Dusp9
Cxcl2	Rapgef2	Rapgef2
Tnfaip3	Ntf5	Ntf5
Hsp90b1	Fgf20	Fgf20
Trip6	Fgf16	Fgf16
Map3k7	Cacng7	Cacng7
Mapk1	Cacng8	Cacng8
Mapk10	Mapkapk3	Mapkapk3
Mapk13	Dusp22	Dusp22
Mapk14	Arrb1	Arrb1
Mapk3	Braf	Braf
Mapk8	Rap1a	Rap1a
Mapk9	Raf1	Raf1
Mapk12	Rasa2	Rasa2
Mefv	Cacng5	Cacng5
Erbb2ip	Rac3	Rac3
Tab1	Flna	Flna
Tab3	Hspa1a	Hspa1a
Pycard	Rap1b	Rap1b
Sugt1	Arrb2	Arrb2
Tab2	Taok1	Taok1
Nod1	Rasa1	Rasa1
Ripk2	Pak2	Pak2
Nlrp3	Map4k3	Map4k3
Card6	Rasgrp4	Rasgrp4
Arntl	Dusp7	Dusp7
Clock	Rasgrp3	Rasgrp3
Cry1	Dusp5	Dusp5
Cry2	Flnb	Flnb
Npas2	Dusp4	Dusp4
Per1	Cacna2d4	Cacna2d4
Per2	Taok3	Taok3
Per3	Taok2	Taok2
Rora	Chrna7	Chrna7
Rorc	Adora2a	Adora2a
Bhlhe40	Adora2b	Adora2b
Csnk1e	Adra1b	Adra1b
Fbxl3	Adra1a	Adra1a
6430520M22Rik /// Bhlhe41	Adrb1	Adrb1
Csnk1d	Adrb2	Adrb2
Nr1d1	Adrb3	Adrb3
Rorb	Agtr1a	Agtr1a
Cnga1	Agtr1b	Agtr1b
Gnat1	Slc25a4	Slc25a4
Gnat2	Slc25a5	Slc25a5
Gnb1	Atp2a1	Atp2a1
Gngt1	Atp2a2	Atp2a2
Guca1a	Atp2b2	Atp2b2
Gucy2e	Bdkrb1	Bdkrb1
Pde6b	Bdkrb2	Bdkrb2
Pde6g	Camk2a	Camk2a
Rcvrn	Camk2b	Camk2b
Rgs9	Camk2g	Camk2g
Grk1	Camk4	Camk4
Guca1b	Cckar	Cckar
Arrb1	Cckbr	Cckbr
Rho	Chrm1	Chrm1
Slc24a1	Chrm3	Chrm3
Arrb2	Drd1a	Drd1a
Pde6a	Ednra	Ednra
Cngb1	Ednrb	Ednrb
Neurog3	Erbb2	Erbb2
Hhex	Erbb3	Erbb3
Mnx1	Erbb4	Erbb4
Foxa2	F2r	F2r
Foxa3	Gna11	Gna11
Hnf4a	Gna14	Gna14
Onecut1	Gna15	Gna15
Iapp	Gnal	Gnal
Ins1	Gnaq	Gnaq
Ins2	Gnas	Gnas
Bhlha15	Grin1	Grin1
Neurod1	Grin2a	Grin2a
Nkx2-2	Grin2c	Grin2c
Nkx6-1	Grin2d	Grin2d
Pax4	Grm1	Grm1
Pax6	Grpr	Grpr
Pdx1	Hrh1	Hrh1
Slc2a2	Hrh2	Hrh2
Hnf1a	Htr2b	Htr2b
Hnf1b	Htr2c	Htr2c
Nr5a2	Htr4	Htr4
Hnf4g	Htr5a	Htr5a
Atp4a	Htr5b	Htr5b
Atp4b	Htr6	Htr6
Car2	Htr7	Htr7
Slc12a7	Itpr1	Itpr1
Slc4a1	Itpr2	Itpr2
Clcnkb	Itpr3	Itpr3
Atp6v1b1	Lhcgr	Lhcgr
Atp6v0a4	Ntsr1	Ntsr1
	Oxtr	Oxtr
	P2rx1	P2rx1
	P2rx4	P2rx4
	P2rx7	P2rx7
	P2rx6	P2rx6
	Phka1	Phka1
	Phkg1	Phkg1
	Pln	Pln
	Ptafr	Ptafr
	Ptger1	Ptger1
	Ptger3	Ptger3
	Ptgfr	Ptgfr
	Ptk2b	Ptk2b
	Ryr1	Ryr1
	Ryr2	Ryr2
	Ryr3	Ryr3
	Slc8a1	Slc8a1
	Tacr1	Tacr1
	Tacr2	Tacr2
	Tacr3	Tacr3
	Tbxa2r	Tbxa2r
	Tnnc1	Tnnc1
	Tnnc2	Tnnc2
	Trhr	Trhr
	Trpc1	Trpc1
	Vdac1	Vdac1
	Vdac2	Vdac2
	Vdac3	Vdac3
	Avpr1b	Avpr1b
	Atp2a3	Atp2a3
	Avpr1a	Avpr1a
	Ltb4r2	Ltb4r2
	Cysltr1	Cysltr1
	Atp2b1	Atp2b1
	Phkg2	Phkg2
	Cysltr2	Cysltr2
	Calml3	Calml3
	Slc25a31	Slc25a31
	Calm4	Calm4
	P2rx5	P2rx5
	Phkb	Phkb
	Mylk	Mylk
	Camk2d	Camk2d
	Grm5	Grm5
	Phka2	Phka2
	Slc8a2	Slc8a2
	Slc8a3	Slc8a3
	Mylk3	Mylk3
	P2rx3	P2rx3
	Mylk2	Mylk2
	P2rx2	P2rx2
	Atp2b3	Atp2b3
	Atp2b4	Atp2b4
	Acvr1	Acvr1
	Acvr2a	Acvr2a
	Acvr2b	Acvr2b
	Amh	Amh
	Cxcr5	Cxcr5
	Bmp2	Bmp2
	Bmp7	Bmp7
	Bmpr1a	Bmpr1a
	Bmpr1b	Bmpr1b
	Bmpr2	Bmpr2
	Ccr6	Ccr6
	Cxcr2	Cxcr2
	Cxcr3	Cxcr3
	Cxcr4	Cxcr4
	Ccr1	Ccr1
	Ccr9	Ccr9
	Ccr1l1	Ccr1l1
	Ccr3	Ccr3
	Ccr2	Ccr2
	Ccr4	Ccr4
	Ccr5	Ccr5
	Ccr7	Ccr7
	Ccr8	Ccr8
	Ccr10	Ccr10
	Cxcr7	Cxcr7
	Cntfr	Cntfr
	Csf1	Csf1
	Csf2	Csf2
	Csf2ra /// LOC100045292	Csf2ra /// LOC100045292
	Csf2rb	Csf2rb
	Csf3	Csf3
	Ctf1	Ctf1
	Cx3cr1	Cx3cr1
	Eda	Eda
	Epor	Epor
	Figf	Figf
	Flt1	Flt1
	Flt3	Flt3
	Flt4	Flt4
	Gdf5	Gdf5
	Ghr	Ghr
	Cxcl1	Cxcl1
	Hgf	Hgf
	Cxcl10	Cxcl10
	Ifna1	Ifna1
	Ifna2	Ifna2
	Ifna4	Ifna4
	Ifna5	Ifna5
	Ifna9	Ifna9
	Ifnab	Ifnab
	Ifnar1	Ifnar1
	Ifnar2	Ifnar2
	Ifnb1	Ifnb1
	Ifng	Ifng
	Ifngr1	Ifngr1
	Ifngr2	Ifngr2
	Il10	Il10
	Il10ra	Il10ra
	Il10rb	Il10rb
	Il11	Il11
	Il12a	Il12a
	Il12b	Il12b
	Il12rb1	Il12rb1
	Il12rb2	Il12rb2
	Il13	Il13
	Il13ra1	Il13ra1
	Il15	Il15
	Il17a	Il17a
	Il17ra	Il17ra
	Il18	Il18
	Il18rap	Il18rap
	Il1rap	Il1rap
	Il18r1	Il18r1
	Il2	Il2
	Il2ra	Il2ra
	Il2rb	Il2rb
	Il2rg	Il2rg
	Il3	Il3
	Il3ra	Il3ra
	Il4	Il4
	Il4ra	Il4ra
	Il5	Il5
	Il5ra	Il5ra
	Il6	Il6
	Il6ra	Il6ra
	Il6st	Il6st
	Il7	Il7
	Il9	Il9
	Inhba	Inhba
	Inhbb	Inhbb
	Inhbc	Inhbc
	Inhbe	Inhbe
	Kdr	Kdr
	Kit	Kit
	Lep	Lep
	Lif	Lif
	Xcl1	Xcl1
	Ltbr	Ltbr
	Met	Met
	Kitl	Kitl
	Cxcl9	Cxcl9
	Mpl	Mpl
	Ngfr	Ngfr
	Tnfrsf11b	Tnfrsf11b
	Osm	Osm
	Prl	Prl
	Ccl1	Ccl1
	Ccl11	Ccl11
	Ccl17	Ccl17
	Ccl20	Ccl20
	Ccl22	Ccl22
	Ccl25	Ccl25
	Ccl27a /// Ccl27b	Ccl27a /// Ccl27b
	Ccl3	Ccl3
	Ccl4	Ccl4
	Ccl5	Ccl5
	Ccl6	Ccl6
	Ccl7	Ccl7
	Ccl9	Ccl9
	Cxcl15	Cxcl15
	Cxcl2	Cxcl2
	Cxcl5	Cxcl5
	Cx3cl1	Cx3cl1
	Cxcl12	Cxcl12
	Tnfrsf10b	Tnfrsf10b
	Tnfrsf11a	Tnfrsf11a
	Tnfrsf17	Tnfrsf17
	Tnfrsf18	Tnfrsf18
	Tnfrsf1b	Tnfrsf1b
	Cd40	Cd40
	Cd27	Cd27
	Tnfrsf8	Tnfrsf8
	Tnfrsf9	Tnfrsf9
	Tnfsf11	Tnfsf11
	Cd40lg	Cd40lg
	Cd70	Cd70
	Tnfsf8	Tnfsf8
	Tnfsf9	Tnfsf9
	Tnfsf10	Tnfsf10
	Tnfrsf4	Tnfrsf4
	Tnfsf4	Tnfsf4
	Vegfa	Vegfa
	Vegfb	Vegfb
	Vegfc	Vegfc
	Xcr1	Xcr1
	Tnfsf13b	Tnfsf13b
	Tnfrsf12a	Tnfrsf12a
	Tnfrsf19	Tnfrsf19
	Il17rb	Il17rb
	Tnfsf14	Tnfsf14
	Tslp	Tslp
	Pdgfc	Pdgfc
	Cxcl13	Cxcl13
	Cxcl11	Cxcl11
	Il17b	Il17b
	Ccl24	Ccl24
	Clcf1	Clcf1
	Pf4	Pf4
	Ccl28	Ccl28
	Cxcl14	Cxcl14
	Ppbp	Ppbp
	Crlf2	Crlf2
	Tnfrsf13b	Tnfrsf13b
	Il20	Il20
	Il21r	Il21r
	Cxcl16	Cxcl16
	Pdgfd	Pdgfd
	Tnfrsf13c	Tnfrsf13c
	Cxcr6	Cxcr6
	Il23a	Il23a
	Tnfrsf25	Tnfrsf25
	Il24	Il24
	Tnfrsf21	Tnfrsf21
	Il25	Il25
	9130219A07Rik	9130219A07Rik
	Tnfrsf14	Tnfrsf14
	Il22ra2	Il22ra2
	Il28ra	Il28ra
	Relt	Relt
	Rhoa	Rhoa
	Bcar1	Bcar1
	Csk	Csk
	Ptk2	Ptk2
	Fgr	Fgr
	Gnai1	Gnai1
	Gnai2	Gnai2
	Gnai3	Gnai3
	Gnb1	Gnb1
	Gnb2	Gnb2
	Gnb3	Gnb3
	Gnb4	Gnb4
	Gnb5	Gnb5
	Gngt1	Gngt1
	Gng10	Gng10
	Gng2	Gng2
	Gng3	Gng3
	Gng4	Gng4
	Gng7	Gng7
	Gng8	Gng8
	Gngt2	Gngt2
	Grk4	Grk4
	Grk5	Grk5
	Hck	Hck
	Itk	Itk
	Jak2	Jak2
	Jak3	Jak3
	Ncf1	Ncf1
	Nfkbia	Nfkbia
	Nfkbib	Nfkbib
	Pik3ca	Pik3ca
	Pik3cd	Pik3cd
	Pik3r1	Pik3r1
	Pik3r2	Pik3r2
	Pik3r3	Pik3r3
	Prkcd	Prkcd
	Prkcz	Prkcz
	Pxn	Pxn
	Rock1	Rock1
	Rock2	Rock2
	Ccl2	Ccl2
	Shc1	Shc1
	Shc3	Shc3
	Stat1	Stat1
	Stat2	Stat2
	Stat3	Stat3
	Stat5b	Stat5b
	Tiam1	Tiam1
	Vav1	Vav1
	Vav2	Vav2
	Was	Was
	Tiam2	Tiam2
	Grk1	Grk1
	Grk6	Grk6
	Pik3cg	Pik3cg
	Foxo3	Foxo3
	Gsk3b	Gsk3b
	Vav3	Vav3
	Gng13	Gng13
	Gng11	Gng11
	Wasl	Wasl
	Pik3cb	Pik3cb
	Pard3	Pard3
	Adrbk1	Adrbk1
	Elmo1	Elmo1
	Shc2	Shc2
	Prex1	Prex1
	Pik3r5	Pik3r5
	Gsk3a	Gsk3a
	Chrna1	Chrna1
	Chrna4	Chrna4
	Chrna6	Chrna6
	Chrnb1	Chrnb1
	Chrnb2	Chrnb2
	Chrnd	Chrnd
	Chrne	Chrne
	Chrng	Chrng
	Adcyap1r1	Adcyap1r1
	Adora1	Adora1
	Adora3	Adora3
	Adra2a	Adra2a
	Adra2b	Adra2b
	Adra2c	Adra2c
	Agtr2	Agtr2
	Avpr2	Avpr2
	Brs3	Brs3
	Tspo	Tspo
	C3ar1	C3ar1
	C5ar1	C5ar1
	Calcr	Calcr
	Cga	Cga
	Chrm4	Chrm4
	Cnr1	Cnr1
	Cnr2	Cnr2
	Crhr1	Crhr1
	Crhr2	Crhr2
	Ctsg	Ctsg
	Drd2	Drd2
	Drd3	Drd3
	Drd4	Drd4
	S1pr1	S1pr1
	S1pr3	S1pr3
	S1pr4	S1pr4
	Fpr2	Fpr2
	Fpr1	Fpr1
	Fpr3	Fpr3
[truncated: 2,581 more rows]

## Sheet: Msgn1 CHIP-seq gene symbol
Msgn1 CHIP-seq gene symbol
2510009E07Rik
4933426M11Rik
Abcd4
Ablim1
Abtb2
Acot11
Adam22
Adamts3
Adamts9
Aldh18a1
Amhr2
Ankrd1
Aplnr
Arhgap28
Arhgef18
Arid3a
Asb4
Asxl3
Atp7b
Atp8a1
Bcl6
Bend3
Cacnb2
Camk1d
Camkk2
Capn2
Capn5
Cbfa2t3
Ccdc109b
Ccdc134
Ccdc80
Cdc42ep1
Cdc42ep3
Cdh1
Cdh11
Cdh8
Cdk14
Ceacam10
Clvs1
Cnrip1
Col13a1
Col14a1
Col23a1
Col4a1
Col4a2
Cpt1a
Cpxm2
Ctsc
Cxcl12
Cyp4f15
Dgkg
Dkk1
Dlc1
Dlg5
Dll1
Dll3
Dmrta1
Dnahc2
Dnmt3b
Dpysl2
Ece1
Edil3
Efna3
Ell2
Elovl7
Emid2
Epas1
Epb4.1l3
Epha4
Erg
Eya1
Fabp7
Fam134b
Fam19a2
Fbln2
Fbn2
Fbxo15
Fgf10
Fgf15
Fli1
Foxc1
Foxp1
Frem1
Frem2
Frmd4a
Frmd4b
Frmd5
Frmd6
Fstl1
Gad1
Gadd45g
Gas7
Gata4
Gbx2
Gfra2
Glipr2
Gna14
Gng2
Gpr116
Gpt2
Greb1l
Grik3
Grin2c
H2-Ab1
Hapln1
Hmga2
Hoxb1
Hoxb3
Hs3st3b1
Hspa12a
Id3
Ifitm1
Irf2
Itga8
Itpkb
Kalrn
Kcnj5
Kcnk1
Kcnma1
Kcnq5
Kif21a
Kirrel
Klhl29
Lama1
Lef1
Leprel1
Lhfp
Lhfpl2
Lima1
Limch1
Lrig1
Mamdc2
Man1c1
Map2k6
Mapk13
Mbp
Meis2
Met
Mllt3
Mn1
Morc1
Moxd1
Mpped2
Msrb3
Myc
Myl1
Myl7
Nav2
Ncam1
Nfatc1
Nin
Nme5
Notch1
Nrp2
Nuak1
Otx2
Pak3
Pcdh19
Pcsk5
Pde4dip
Pdgfra
Pdlim4
Pdlim5
Phc1
Phf17
Plce1
Plcg2
Plekhg1
Plxna2
Plxna4
Ppm1h
Ppp3ca
Prdm1
Prdm6
Prex1
Prkce
Prkd1
Prtg
Prune2
Ptgds
Ptpre
Qprt
Rapgef5
Rasgrp3
Rbms1
Rbms3
Reep1
Reln
Rftn1
Rgl1
Rimbp2
Rnd3
S1pr5
Scube2
Sdk2
Sema6a
Sept8
Sfrp1
Sgcb
Sh3bp1
Sh3rf3
Shb
Shisa9
Slc38a4
Slc39a8
Slc40a1
Slco3a1
Smad1
Smarca2
Snai1
Snx10
Snx24
Sox6
Sparc
Sparcl1
Spats2l
Spon1
Spry2
Syt13
Tanc2
Tbc1d4
Tbx3
Tbx6
Thbs2
Tmem132c
Tnc
Trim2
Tsc22d1
Ucma
Unc5c
Vav3
Vcan
Wnt3
Wwc1
Zc3hav1
Zdhhc14
Zeb2
Zfp365
Zfp423
Zfp703
Zfpm2
Zic2
Zmynd8
Adrbk2
Alpl
C77370
Cd59a
Cdh2
Cdk5r2
Celf4
Cotl1
Ctsh
Dock11
Ebf2
Eomes
Fam19a4
Fhl1
Flt1
Gata6
Gm11744
Gstt1
Hmgn3
Hsdl2
Krt12
Lefty2
Lgr5
Lrig3
Pacsin1
Pam
Pdzrn3
Phc2
Prickle1
Prmt8
Rai2
Rhobtb1
Sema6d
Six1
Slc22a23
Spsb4
Tes
Zc3h6
Ankrd6
Btbd17
D630045J12Rik
Fbp1
Gpr155
Greb1
Hck
Irgm2
Itpr1
Lyn
Ntf3
Zfpm1
Sept11
0610012H03Rik
1110004E09Rik
1110051M20Rik
1190005I06Rik
1500002O10Rik
1600002D24Rik
1700007G11Rik
1700012B09Rik
1700019N19Rik
1700019O17Rik
1700023C21Rik
1700025G04Rik
1700052N19Rik
1700054A03Rik
1700065I16Rik
1700091E21Rik
1700112E06Rik
1700123O12Rik
2010300C02Rik
2210018M11Rik
2210404J11Rik
2210408F21Rik
2210408I21Rik
2310005A03Rik
2310007L24Rik
2410137M14Rik
2610203C22Rik
2610307P16Rik
2810025M15Rik
2810055G20Rik
2900057B20Rik
3100003L05Rik
3425401B19Rik
3930402G23Rik
4732471J01Rik
4921509O07Rik
4921513I03Rik
4921531C22Rik
4921536K21Rik
4930430J02Rik
4930447A16Rik
4930448I06Rik
4930449E01Rik
4930455H04Rik
4930478P22Rik
4930502E18Rik
4930518P08Rik
4930528P14Rik
4930533P14Rik
4930545L23Rik
4930548J01Rik
4930552P12Rik
4930593A02Rik
4932412D23Rik
4932435O22Rik
4933406J08Rik
4933406J10Rik
4933412E24Rik
4933417E11Rik
4933432G23Rik
5031426D15Rik
5730522E02Rik
5830416P10Rik
5830418P13Rik
6030407O03Rik
8430410A17Rik
9030617O03Rik
9230105E05Rik
9430014N10Rik
9430076C15Rik
9430076G02Rik
9530026F06Rik
A330050F15Rik
A430093F15Rik
A4galt
A630072M18Rik
A930001A20Rik
A930003A15Rik
A930024E05Rik
Aanat
Aasdh
Abcb1a
Abcb9
Abcc6
Abhd14b
Abi3bp
Abl1
Abl2
Acadl
Acin1
Acly
Actn1
Acyp2
Adam19
Adamts17
Adamtsl2
Adar
Adcy10
Adcy3
Adcy5
Adcy6
Adcy8
Add2
Adi1
Adipor1
Adk
Adra1b
Adra1d
Adra2a
Aff3
Afg3l2
Agap3
Agbl3
Agfg1
Agpat3
Agrp
Ahdc1
Ahi1
Ahsg
AI182371
Akap1
Akap11
Akap13
Akap6
Akap8
Akna
Aknad1
Akt2
Aldh1a2
Aldh1b1
Aldh1l1
Alk
Ambra1
Amn1
Amotl2
Ank2
Anks1
Anks1b
Ano2
Antxr1
Anxa6
Ap2b1
Ap3b1
Apba1
Apol7d
Appbp2
Aqp11
Aqp5
Aqp8
Arap2
Arhgap10
Arhgap15
Arhgap17
Arhgap24
Arhgap42
Arhgef28
Arhgef3
Arid1a
Arid1b
Arid3b
Arl15
Arl4d
Arl6
Armc2
Armc4
Arnt
Arnt2
Arpp21
Arrb1
Arsj
Asap1
Asb14
Asb2
Asb3
Ascc3
Ascl5
Asic2
Aspg
Asph
Astn1
Astn2
Atg16l2
Atg7
Atm
Atp10b
Atp2b1
Atp2b2
Atp2c1
Atp8a2
Atp8b1
Atp9b
Atrnl1
Atxn10
Atxn7l1
Auts2
B230118H07Rik
B230120H23Rik
B930018H19Rik
B930092H01Rik
Baalc
Bace2
Bag3
Baiap2l1
Banf2
Basp1
Baz2a
Bbc3
Bbs1
Bbs5
Bbs9
BC017158
BC018242
BC021891
BC030307
BC030476
BC035044
BC049635
BC052040
Bcap29
Bcar3
Bcas1
Bcat1
Bcdin3d
Bckdhb
Bcl2a1c
Bcl2l1
Bcl2l13
Bcl2l15
Bclaf1
Bcmo1
Bcor
Bdh1
Begain
Best1
Bhlhe41
Bhmt
Bin1
Birc6
Blnk
Bloc1s5
Brd4
Bre
Btbd16
Btbd9
Btd
Btn2a2
Bub1b
C430002E04Rik
C87198
Cachd1
Cacna1a
Cacna1d
Cacna1i
Cacna1s
Cacna2d2
Cacna2d3
Cacna2d4
Cacnb4
Cacng5
Cadm1
Calhm1
Camk2a
Camk2d
Cant1
Cartpt
Casz1
Catsperb
Cav1
Cbfa2t2
Cbfb
Cc2d2a
Ccar1
Ccbl2
Ccdc12
Ccdc162
Ccdc33
Ccdc42
Ccdc53
Ccdc81
Ccdc83
Ccnd3
Ccnl1
Ccny
Ccr5
Ccsap
Ccser1
Cd160
Cd164l2
Cd247
Cd47
Cd9
Cdc14b
Cdc6
Cdcp1
Cdcp2
Cdh22
Cdh26
Cdhr1
Cdk15
Cdk5rap2
Cdk5rap3
Cdk6
Cdkal1
Cdkl1
Cdkl4
Cdkl5
Cds1
Cdyl2
Cecr2
Cecr5
Cela2a
Celf2
Cep164
Cep170b
Cep85
Cep85l
Cgnl1
Chd8
Chd9
Chit1
Chmp5
Chn1
Chn2
Chodl
Chst11
Chst8
Cib4
Clcn2
Cldn10
Cldn17
Cldn25
Cldn26
Cldn4
Clec2i
Clic4
Clmp
Clnk
Clp1
Clybl
Cmc1
Cmip
Cnbd2
Cnot8
Cnr2
Cntn2
Cntn4
Cntnap1
Cntnap2
Cntnap5c
Cobll1
Cog1
Cog2
Col19a1
Col25a1
Colq
Commd1
Commd10
Copz1
Coq2
Coro2a
Cpa2
Cpa5
Cpe
Cped1
Cplx3
Cpq
Cr2
Crabp2
Cradd
Crcp
Crh
Crmp1
Crtc3
Csf3r
Csk
Csmd1
Csnk1g2
Ctif
Ctnnbl1
Cts6
Cttnbp2
Cul5
Cwc27
Cx3cl1
Cxxc5
Cyb5
Cyb561d1
Cyb5rl
Cyld
Cyp17a1
Cyp2e1
Cyp39a1
Cyp4f39
Cyp4x1
D030018L15Rik
D030024E09Rik
D130009I18Rik
D230030E09Rik
D430041D05Rik
D430042O09Rik
D630013N20Rik
D730050B12Rik
D7Ertd443e
D930015E06Rik
Daam1
Dab1
Dab2ip
Dach1
Dagla
Dapk2
Dcaf10
Dcbld1
Dcdc2c
Dclk3
Dcp1b
Ddhd1
Ddit4
Ddr2
Ddx11
Def6
Degs1
Dennd1a
Dennd1b
Deptor
Dera
Dgkh
Dgki
Dgkz
Dhx29
Diap3
Dicer1
Dip2b
Dlg3
Dlgap1
Dmkn
Dmrtb1
Dnahc11
Dnahc6
Dnahc8
Dnajb13
Dnajc1
Dnajc5b
Dnmbp
Dnmt3a
Dock1
Dock2
Dock4
Dock8
Dock9
Dopey2
Dph3
Dpp6
Dppa5a
Dpysl5
Dscam
Dst
Dstn
Dtl
Dtnbp1
Dtx3
Dusp1
Dusp4
Dydc1
Dym
Dync1i1
Dync1li1
E130012A19Rik
E130114P18Rik
E130307A14Rik
E2f7
Ebf1
Ebf3
Edf1
Eef1a2
Eef1g
Efna5
Ehd1
Ehd3
Ehf
Eif1a
Eif2b5
Eif3h
Eif4b
Eif4e
Elmo1
Emilin3
Eml6
Enc1
Endod1
Eno4
Epb4.1l2
Epb4.1l4a
Epb4.1l5
Epc2
Epha1
Epha3
Epha6
Epm2a
Eps15l1
Erc1
Erc2
Erich1
Espl1
Etf1
Ets2
Etv1
Etv6
Exoc4
Ext1
Ext2
Extl3
Eya4
Fads2
Faf1
Fam108c
Fam110a
Fam120b
Fam124a
Fam124b
Fam129b
Fam135b
Fam13a
Fam159a
Fam160a1
Fam168a
Fam189a1
Fam35a
Fam53a
Fam53b
Fam60a
Fam65a
Fam72a
Fam81a
Fam82b
Fam83b
Farp1
Fars2
Farsb
Fat3
Fbln1
Fbxl2
Fbxl3
Fbxl5
Fbxl8
Fbxo25
Fbxw8
Fcho2
Fchsd2
Fech
Fermt1
Fert2
Fgd2
Fgd4
Fgf12
Fgf23
Fgf6
Fgfr1
Fgfr2
Fggy
Fhit
Fhod3
Filip1l
Fkbp5
Fkbpl
Flnb
Fmn1
Fmnl2
Fndc7
Fnip2
Fntb
Focad
Foxj2
Foxn3
Frmd8
Frmpd4
Fsd1l
Fshr
Fstl4
Fto
Ftsjd2
Fut4-ps1
Fxr2
Fyn
G630025P09Rik
G630055G22Rik
Gabbr2
Gabrg3
Galnt7
Garnl3
Gbf1
Gcc2
Gck
Gcnt2
Gdap1l1
Gfra3
Gga1
Ggcx
Gipr
Git1
Gk5
Gle1
Gli3
Glis1
Glt1d1
Gm10494
Gm11202
Gm11602
Gm12522
Gm12695
Gm12718
Gm13031
Gm13497
Gm14492
Gm15217
Gm15386
Gm16039
Gm16119
Gm1631
Gm1653
Gm16532
Gm16897
Gm1715
Gm17359
Gm20125
Gm20597
Gm20755
Gm20757
Gm4262
Gm4559
Gm5086
Gm5095
Gm5134
Gm527
Gm6116
Gm6614
Gm7244
Gm765
Gm805
Gm833
Gm9079
Gm973
Gmds
Gna12
Gnaq
Golm1
Gorab
Gosr1
Gp1ba
Gpat2
Gpatch1
Gpatch2
Gphn
Gpi1
Gpr115
Gpr125
Gpr126
Gpr158
Gpr19
Gpr56
Gpr98
Gramd1b
Gramd3
Grhl3
Grid1
Grid2
Grik4
Grk5
Grm1
Grm5
Grp
Gse1
Gsg1l
Gsk3a
Gsk3b
Gt(ROSA)26Sor
Gtf3c1
Gtf3c2
Gucy1a3
Gzmk
Gzmm
H13
H2afy2
H3f3b
Hace1
Hand2
Hbp1
Hcrtr2
Hdac4
Hdac8
Heg1
Hells
Hephl1
Herc3
Hhat
Hibadh
Hist1h1e
Hivep2
Hk2
Hkdc1
Hmgxb3
Hmox2
Hnrnpa2b1
Hnrnpl
Hpse2
Hrh2
Hs3st2
Hs3st4
Hs6st2
Hs6st3
Hspg2
Htra1
I830077J02Rik
Icmt
Iffo2
Ifitm10
Ift43
Igdcc3
Igf1r
Igf2bp1
Igf2r
Igsf11
Igsf21
Igsf5
Igsf9b
Ikzf1
Il10rb
Il17d
Il17rd
Il23r
Il3
Il31ra
Immp2l
Immt
Impa2
Inf2
Inpp4a
Inpp5a
Ints6
Invs
Iqca
Iqcb1
Iqcd
Iqgap2
Irak3
Ireb2
Irf2bpl
Irs1
Irx6
Itga5
Itgb5
Itgb6
Itgbl1
Itpk1
Itpkc
Itsn1
Jakmip1
Jakmip3
Jam3
Jph1
Kank1
Kansl1
Kat2b
Kat6b
Kat7
Katnal1
Kcmf1
Kcnab1
Kcnab2
Kcnab3
Kcnd3
Kcng3
Kcnh7
Kcnj16
Kcnk13
Kcnk3
Kcnn3
Kcnq3
Kctd6
Khdrbs2
Kif13a
Kif15
Kif3b
Kif5a
Kif6
Kifc2
Kirrel3
Klf9
Klhdc10
Kng2
Krt8
Krtap26-1
Krtap5-3
Ksr1
Lactbl1
Lama5
Lamb3
Laptm4b
Larp7
Lass6
Lats2
Ldb2
Ldha
Ldlrad3
Lfng
Lhfpl3
Lhpp
Lhx6
Lingo2
Llgl1
Lmo7
Lmtk2
Lmx1b
Lnx2
Loh12cr1
Lpar1
Lpcat3
Lphn3
Lpp
Lrba
Lrch4
Lrmp
Lrp1
Lrp11
Lrp1b
Lrpprc
Lrrc1
Lrrc34
Lrrc49
Lrrc6
Lrrfip1
Lrrfip2
Lsamp
Lsm14a
Ly86
Lypla2
Lysmd4
Lyzl6
Lzts1
Macf1
Macrod2
Magi1
Magi2
Magi3
Mak16
Maml3
Mamld1
Man1a2
Map2k5
Map3k11
Map3k3
Map3k7
Map4
Map4k3
Map6d1
Map7
Mapk4
Mapkap1
Mapre3
Marcksl1-ps4
Mark3
Mast4
Matn1
Mb21d2
Mbd2
Mboat2
Mccc2
Mcph1
Mcu
Mdga1
Mdga2
Mecom
Med4
Medag
Megf9
Mei1
Memo1
Meox2
Mettl25
Mfhas1
Mfsd10
Mgat5b
Mgst2
Mical2
Mir101c
Mir129-1
Mir1932
Mir23a
Mir3061
Mir30d
Mir449c
Mir802
Mis12
Mis18a
Mkl1
Mkx
Mlec
Mlip
Mlxip
Mmel1
Mmp24
Mmp27
Mms19
Mnat1
Mnd1
Mob1a
Mobp
Morn5
Mprip
Mrap2
Mrc1
Mroh8
Mrpl11
Mrpl3
Mrps27
Mrrf
Msi1
Msi2
Mtch1
Mthfd1
Mtus1
Mvb12b
Mvp
Mxd3
Mybphl
Mycn
Myh11
Myh9
Myo16
Myo18b
Myo1b
Myo1d
Myo3a
Myo3b
Myo5c
Myocd
Myrfl
Myt1l
Nacc2
Naga
Naglu
Nalcn
Nanog
Nat8
Nav1
Ncald
Ncf2
Nckap5
Ncoa2
Nctc1
Ndnf
Ndufa9
Nedd1
Nedd4
Nek7
Nell1
Nes
Neu4
Nf2
Nfasc
Nfe2l2
Nfia
Nfic
Nfkb1
Nhs
Nhsl1
Nkain1
Nkain3
Nln
Nme1
Nme2
Nmnat2
Nod2
Nos1
Nos1ap
Notch2
Npas3
Npas4
Nphp1
Nploc4
Npm3-ps1
Npr2
Nr5a2
Nrg3
Nrip1
Nrxn1
Nrxn2
Nrxn3
Nsf
Nt5c2
Nt5dc3
Ntm
Ntrk3
Ntsr1
Nub1
Nudt13
Nudt19
Nudt3
Nxn
Nxph4
Nynrin
Oacyl
Oaz1
Odc1
Ofcc1
Olfr1045
Olfr1102
Olfr1378
Olfr539
Olfr571
Opcml
Optc
Optn
Osbpl2
Otop3
Otp
Otud7a
Pacrg
Paip1
Paip2b
Pamr1
Pank2
Papola
Pappa
Pard3
Pard3b
Park2
Parp8
Parva
Pax3
Pax4
Pax5
Pbx1
Pcdh9
Pced1b
Pcgf5
Pcm1
Pcmtd1
Pcnxl2
Pcp4
Pdcl
Pde11a
Pde1b
Pde2a
Pde4b
Pde4d
Pde8b
Pds5b
Pdss1
Pdyn
Pdzd2
Pea15a
Pebp4
Peli3
Pex26
Pgc
Pgm2
Pgpep1l
Phactr3
Phgdh
Phtf2
Phxr4
Pid1
Pigc
Pigl
Pik3ap1
Pik3c2b
Pik3ip1
Pip4k2a
Pitpnm2
Piwil1
Pkig
Pkn2
Pknox2
Pla2g6
Plagl2
Plcb1
Plcb4
Plcl1
Plcxd1
Pld5
Plk1s1
Plxdc2
Plxnc1
Pmepa1
Pnpla7
Poc1a
Poc1b
Pofut2
Polg
Polk
Poln
Polq
Polr3gl
Pomt1
Pon2
Pou2f3
Pou6f2
Ppap2b
Ppfia2
Ppfibp1
Ppm1k
Ppm1l
Ppp1r21
Ppp1r9a
Pptc7
Pradc1
Prdm2
Prep
Prickle2
Prkca
Prkcq
Prkd2
Prkdc
Prkg1
Prok2
Prph2
Prrc2b
Prss22
Psd2
Psd3
Psma8
Psmb4
Psmd4
Ptchd4
Ptger4
Ptgs1
Ptk2
Ptp4a1
Ptp4a3
Ptpn13
Ptpn21
Ptpn3
Ptpra
Ptprg
Ptprj
Ptprk
Ptpro
Ptprr
Ptprz1
Pum1
Pvrl3
Pvt1
Pwwp2a
Pxn
Pygb
Qsox1
Qtrtd1
R3hcc1l
Rab15
Rab31
Rab6b
Rad23a
Rad51b
Ralgds
Ranbp17
Ranbp9
Rapgef2
Rapgef4
Rapsn
Rarg
Rasef
Rassf5
Rb1
Rbfox1
Rbfox3
Rbks
Rbm4
Rcan2
Rcbtb1
Rcn2
Rcor1
Rcsd1
Reep3
Ren1
Rere
Rfx4
Rgma
Rgmb
Rgs10
Rgs20
Rgs3
Rgs6
Rhbdd1
Rhbg
Rhd
Rheb
Rhobtb3
Rhof
Rhog
Rictor
Rin2
Rit2
Rlim
Rnf103
Rnf112
Rnf14
Rnf145
Rnf165
Rnf186
Rnf19b
Rnmtl1
Robo1
Robo3
Ropn1l
Ror2
Rph3a
Rps10
Rptor
Rras2
Rsbn1l
Rtdr1
Rtn4ip1
Rubie
Runx1
Rwdd4a
Rxfp4
Samd8
Sap30l
Sash1
Satb2
Sbf2
Scai
Schip1
Sclt1
Scn8a
Scnn1a
Scrt2
Scube3
Sdccag8
Sde2
Sdk1
Sdr16c5
Sdsl
Sema4c
Sephs1
Sergef
Setbp1
Setd1b
Sez6
Sgk1
Sgms1
Sgpp1
Sh3gl3
Sh3kbp1
Sh3pxd2a
Sh3rf2
Shank2
Shc3
Shroom3
Sidt1
Sik3
Sil1
Sim2
Sipa1l2
Sipa1l3
Sirt1
Ska1
Skap1
Ski
Sla
Slc12a1
Slc12a2
Slc12a8
Slc14a2
Slc16a5
Slc17a6
Slc18b1
Slc1a2
Slc1a7
Slc22a15
Slc22a18
Slc22a22
Slc24a3
Slc25a12
Slc26a3
Slc26a4
Slc27a4
Slc2a12
Slc35f3
Slc35f4
Slc39a11
Slc39a3
Slc43a1
Slc44a5
Slc46a1
Slc52a3
Slc5a4b
Slc7a5
Slc7a6
Slc7a7
Slc9a3r1
Slc9a9
Slco1c1
Slit1
Slit2
Slit3
Smad2
Smarcal1
Smarcb1
Smcr8
Smg6
Smndc1
Smtnl2
Smug1
Smyd3
Sncaip
Snd1
Snhg6
Snrnp35
Snrnp48
Snx11
Snx29
Sorbs1
Sorbs3
Sorcs3
Sort1
Sowahd
Sp140
Spata16
Spg20
Spink4
Spinkl
Spire1
Spn
Spred2
Spry1
Spsb1
Sptbn1
Sptlc2
Srgap1
Srgap2
Srrm4
Srsf4
Srsf9
Ssbp2
Ssbp3
Ssr1
St3gal3
St6gal1
St6galnac3
Stac2
Stag1
Stam
Stard13
Stim2
Ston2
Stox2
Stpg1
Strip1
Strip2
Strn
Sufu
Sulf1
Susd4
Suv420h2
Sv2b
Syn3
Syne3
Synj2
Synm
Synpr
Syt10
Syt7
Szt2
Taar4
Tacc2
Tacr2
Tacr3
Taf3
Taf4a
Taf6l
Tanc1
Tasp1
Tbc1d1
Tbc1d15
Tbc1d22a
Tbc1d9
Tbca
Tbcel
Tbr1
Tbxa2r
Tbxas1
Tceal6
Tcf4
Tcf7l1
Tcf7l2
Tcte2
Tdgf1
Tead1
Tenm2
Tenm3
Tenm4
Tfcp2l1
Tff3
Tha1
Thada
Thap6
Thrb
Thsd7a
Tiam2
Tifa
Timm50
Timp3
Tle3
Tle4
Tlk2
Tll2
Tln2
Tm9sf4
Tmcc1
Tmcc2
Tmem100
Tmem104
Tmem116
Tmem123
Tmem132d
Tmem135
Tmem143
Tmem144
Tmem178b
Tmem183a
Tmem200c
Tmem238
Tmem33
Tmem41a
Tmem44
Tmem47
Tmem51
Tmem63a
Tmod1
Tmprss6
Tmx1
Tnfaip6
Tnfaip8
Tnfrsf19
Tnfrsf23
Tnip1
Tnni1
Tnr
Tnrc6b
Tns4
Tox
Tpcn2
Tpm3
Trabd2b
Traf2
Trak1
Trappc8
Trappc9
Trat1
Trim24
Trim36
Trim44
Trim71
Trmt10c
Trp53bp1
Trp53i13
Trp53inp2
Trpc4
Trpc4ap
Trpm3
Trps1
Tshz2
Tsku
Tspan14
Tspan5
Ttc27
Ttc33
Ttc8
Ttll11
Tuba1c
Tubal3
Tubb4a
Tubb6
Tuft1
Tyk2
Uaca
Uba7
Ube2o
Ube2u
Ubn2
Ubxn7
Uck2
Uevld
Unc13c
Upf2
Urm1
Ush2a
Usp29
Usp47
Uvssa
Vasp
Vcam1
Vcl
Vdac1
Veph1
Vmn1r1
Vmn1r53
Vmn2r19
Vnn1
Vps13d
Vps37b
Vps41
Vrk2
Vstm2l
Vsx1
Vwa3a
Wasf3
Wasl
Wbscr17
Wbscr27
Wdpcp
Wdr12
Wdr27
Wdr37
Wdr65
Wdr72
Wdr91
Wnt2b
Wrap53
Wscd1
Wscd2
Wwox
Wwp1
Xkr7
Xkr9
Xrra1
Xylt1
Yap1
Zan
Zbtb18
Zbtb20
Zbtb40
Zc3h12b
Zcchc10
Zcchc16
Zcchc24
Zfand3
Zfat
Zfhx3
Zfp280b
Zfp282
Zfp292
Zfp329
Zfp330
Zfp37
Zfp385b
Zfp407
Zfp473
Zfp523
Zfp532
Zfp592
Zfp608
Zfp609
Zfp618
Zfp770
Zfp804b
Zfp939
Zhx2
Zmiz1
Znrf1
Znrf2
Znrf3
Znrf4
Zranb3
Zscan26
