# Supplementary material for: A comprehensive transcriptomic analysis of differentiating embryonic stem cells in response to the overexpression of Mesogenin 1
Source: Aging (Albany NY). 2016 Oct 6;8(10):2324–35. doi: 10.18632/aging.101049 (PMC5115891; doi:10.18632/aging.101049)
Supplement: Supplementary file 5 [file aging-08-2324-s005.xls]

## Sheet: 12up
00010: Glycolysis / Gluconeogenesis(57)		00020: Citrate cycle (TCA cycle)(30)		00040: Pentose and glucuronate interconversions(19)		00051: Fructose and mannose metabolism(36)		00052: Galactose metabolism(27)		00071: Fatty acid metabolism(41)		00100: Steroid biosynthesis(18)		00140: Steroid hormone biosynthesis(41)		00230: Purine metabolism(152)		00240: Pyrimidine metabolism(89)		00250: Alanine, aspartate and glutamate metabolism(32)		00260: Glycine, serine and threonine metabolism(30)		00270: Cysteine and methionine metabolism(35)		00280: Valine, leucine and isoleucine degradation(48)		00290: Valine, leucine and isoleucine biosynthesis(12)		00310: Lysine degradation(43)		00330: Arginine and proline metabolism(53)		00340: Histidine metabolism(26)		00350: Tyrosine metabolism(34)		00360: Phenylalanine metabolism(16)		00380: Tryptophan metabolism(40)		00450: Selenocompound metabolism(17)		00514: Other types of O-glycan biosynthesis(32)		00562: Inositol phosphate metabolism(56)		00565: Ether lipid metabolism(35)
ID	Gene Symbol	IDs	Gene Symbol	ID	Gene Symbol	ID	Gene Symbol	ID	Gene Symbol	ID	Gene Symbol	ID	Gene Symbol	ID	Gene Symbol	ID	Gene Symbol	ID	Gene Symbol	ID	Gene Symbol	ID	Gene Symbol	ID	Gene Symbol	ID	Gene Symbol	ID	Gene Symbol	ID	Gene Symbol	ID	Gene Symbol	ID	Gene Symbol	ID	Gene Symbol	ID	Gene Symbol	ID	Gene Symbol	ID	Gene Symbol	ID	Gene Symbol	ID	Gene Symbol	ID	Gene Symbol
1416225_at	Adh1	1456728_x_at	Aco1	1416468_at	Aldh1a1	1424714_at	Aldoc	1449006_at	Gla	1448987_at	Acadl	1417257_at	Cel	1418701_at	Comt1	1417976_at	Ada	1453586_at	Entpd1	1418472_at	Aspa	1418833_at	Agxt	1448484_at	Amd1	1415984_at	Acadm	1415670_at	Copg	1416468_at	Aldh1a1	1416468_at	Aldh1a1	1418472_at	Aspa	1416225_at	Adh1	1418752_at	Aldh3a1	1421666_a_at	Aanat	1418325_at	Sephs2	1455843_at	Fut4	1442073_at	Inpp1	1460199_a_at	Pafah1b1
1421058_at	Adh7	1451002_at	Aco2	1448143_at	Aldh2	1448319_at	Akr1b3	1448319_at	Akr1b3	1415984_at	Acadm	1427372_at	Cyp27b1	1457604_x_at	Cyp11a1	1418128_at	Adcy6	1460433_at	Entpd6	1418372_at	Adsl	1424126_at	Alas1	1423147_at	Mat1a	1460216_at	Acads	1415671_at	Atp6v0d1	1448143_at	Aldh2	1448143_at	Aldh2	1416468_at	Aldh1a1	1421058_at	Adh7	1449396_at	Aoc3	1416468_at	Aldh1a1	1418697_at	Inmt	1420756_at	Fut7	1451330_a_at	Inpp5b	1422791_at	Pafah1b2
1416185_a_at	Adh5	1422577_at	Cs	1415776_at	Aldh3a2	1423556_at	Akr1b7	1423556_at	Akr1b7	1424184_at	Acadvl	1450646_at	Cyp51	1450574_at	Cyp11b2	1456307_s_at	Adcy7	1458677_at	Entpd5	1449383_at	Adssl1	1451675_a_at	Alas2	1450624_at	Bhmt	1416468_at	Aldh1a1	1415672_at	Golga7	1415776_at	Aldh3a2	1415776_at	Aldh3a2	1448143_at	Aldh2	1416185_a_at	Adh5	1442878_at	Prdx6	1448143_at	Aldh2	1415890_at	Papss1	1435308_at	Fut9	1460394_a_at	Inppl1	1416410_at	Pafah1b3
1416468_at	Aldh1a1	1423159_at	Dld	1448319_at	Akr1b3	1449088_at	Fbp2	1416205_at	Glb1	1460216_at	Acads	1448619_at	Dhcr7	1417017_at	Cyp17a1	1418754_at	Adcy8	1439012_a_at	Dck	1460726_at	Adss	1449396_at	Aoc3	1423844_s_at	Cbs	1448143_at	Aldh2	1415673_at	Psph	1436756_x_at	Hadh	1448484_at	Amd1	1418752_at	Aldh3a1	1418752_at	Aldh3a1	1430591_at	Ddc	1415776_at	Aldh3a2	1434510_at	Papss2	1418014_a_at	B4galt1	1455787_x_at	Minpp1	1448136_at	Enpp2
1448143_at	Aldh2	1424828_a_at	Fh1	1423556_at	Akr1b7	1448470_at	Fbp1	1448894_at	Akr1b8	1416409_at	Acox1	1416667_at	Ebp	1449920_at	Cyp19a1	1434454_at	Adcy9	1416448_at	Itpa	1418833_at	Agxt	1450624_at	Bhmt	1448842_at	Cdo1	1415776_at	Aldh3a2	1415674_a_at	Trappc4	1456916_at	Nsd1	1419549_at	Arg1	1415776_at	Aldh3a2	1449396_at	Aoc3	1437612_at		1419435_at	Aox1	1429972_s_at	Txnrd2	1420643_at	Lfng	1443655_s_at	Pik3c2a	1416626_at	Pla2g1b
1418752_at	Aldh3a1	1419821_s_at	Idh1	1448894_at	Akr1b8	1448894_at	Akr1b8	1417880_at	G6pc	1416225_at	Adh1	1448130_at	Fdft1	1422217_a_at	Cyp1a1	1416319_at	Adk	1435277_x_at	Nme1	1416239_at	Ass1	1423844_s_at	Cbs	1447877_x_at	Dnmt1	1419435_at	Aox1	1415675_at	Dpm2	1451274_at	Ogdh	1418847_at	Arg2	1430591_at	Ddc	1419435_at	Aox1	1450970_at	Got1	1416429_a_at	Cat	1424486_a_at	Txnrd1	1416992_at	Mfng	1421704_a_at	Pik3c2g	1450128_at	Pla2g2a
1415776_at	Aldh3a2	1416789_at	Idh3g	1416308_at	Ugdh	1420901_a_at	Hk1	1419428_a_at	Gaa	1421058_at	Adh7	1457248_x_at	Hsd17b7	1416613_at	Cyp1b1	1418372_at	Adsl	1448808_a_at	Nme2	1437612_at		1420709_s_at	Dao	1419749_at	Trdmt1	1430487_at	Auh	1415676_a_at	Psmb5	1445893_at	Plod1	1416239_at	Ass1	1419670_at	Ftcd	1418701_at	Comt1	1417715_a_at	Got2	1422217_a_at	Cyp1a1	1417671_at	Scly	1421160_a_at	Rfng	1429434_at	Pik3ca	1420584_at	Pla2g2c
1424714_at	Aldoc	1416478_a_at	Mdh2	1419622_at	Ugt2b5	1422612_at	Hk2	1450187_a_at	Galt	1416185_a_at	Adh5	1423141_at	Lipa	1455691_at	Cyp21a1	1449383_at	Adssl1	1416530_a_at	Pnp	1416562_at	Gad1	1423159_at	Dld		Dnmt3a	1450871_a_at	Bcat1	1415677_at	Dhrs1	1449374_at	Pipox	1455106_a_at	Ckb	1418645_at	Hal	1450670_at	Dbh	1424618_at	Hpd	1450715_at	Cyp1a2	1438348_x_at	Ccbl1	1420928_at	St6gal1	1453281_at	Pik3cd	1418987_at	Pla2g2d
1448119_at	Bpgm	1448172_at	Mdh1	1419456_at	Dcxr	1449062_at	Khk	1418014_a_at	B4galt1	1416468_at	Aldh1a1	1420013_s_at	Lss	1416809_at	Cyp3a11	1460726_at	Adss	1459319_at	Pola1	1421978_at	Gad2	1422558_at	Gamt	1418351_a_at	Dnmt3b	1425764_a_at	Bcat2	1415678_at	Ppm1a	1432236_a_at	Suv39h1	1417614_at	Ckm	1451796_s_at	Hdc	1418028_at	Dct	1428667_at	Maoa	1416613_at	Cyp1b1	1426243_at	Cth	1450406_a_at	St3gal3	1446974_at	Pikfyve	1448558_a_at	Pla2g4a
1423159_at	Dld	1451274_at	Ogdh	1447112_s_at	Cryl1	1427213_at	Pfkfb1	1417177_at	Galk1	1448143_at	Aldh2	1416222_at	Nsdhl	1419523_at	Cyp3a13	1422184_a_at	Ak1	1448369_at	Pola2	1428715_at	Gfpt1	1417422_at	Gnmt	1437612_at		1416647_at	Bckdha	1415679_at	Psenen	1418519_at	Aadat	1432418_a_at	Ckmt1	1428667_at	Maoa	1430591_at	Ddc	1416335_at	Mif	1430591_at	Ddc	1433974_at	Sephs1	1419622_at	Ugt2b5	1424954_a_at	Pip5k1c	1417814_at	Pla2g5
1419023_x_at	Eno1 /// Gm5506 /// LOC100503183	1455209_at	Pck1	1453487_at	Dhdh	1429486_at	Pfkfb2	1420901_a_at	Hk1	1415776_at	Aldh3a2	1417697_at	Soat1	1421741_at	Cyp3a16	1448451_at	Ak2	1448187_at	Pold1	1418753_at	Gfpt2	1428667_at	Maoa	1450970_at	Got1	1427153_at	Bckdhb	1415680_at	Anapc1	1416686_at	Plod2	1420709_s_at	Dao	1456118_at	Mettl2	1417220_at	Fah	1454638_a_at	Pah	1437612_at		1435161_at	Sepsecs	1415901_at	Plod3	1449404_at	Pip4k2a	1437112_at	Pld1
1418829_a_at	Eno2	1416383_a_at	Pcx	1424934_at	Ugt2b1	1450269_a_at	Pfkl	1422612_at	Hk2	1460409_at	Cpt1a	1415993_at	Sqle	1438743_at	Cyp7a1	1421831_at	Ak4	1448277_at	Pold2	1426235_a_at	Glul	1449374_at	Pipox	1417715_a_at	Got2	1449118_at	Dbt	1415681_at	Mrpl43	1415901_at	Plod3	1422558_at	Gamt	1436689_a_at	Aldh9a1	1437612_at		1427395_a_at	Aldh1a3	1436756_x_at	Hadh	1436777_at	Mars2	1448941_at	B4galt2	1421833_at	Pip5k1b	1457252_x_at	Pld2
1417951_at	Eno3	1418560_at	Pdha1	1450133_at	Ugt2a3	1416780_at	Pfkm	1418363_at	Lalba	1447820_x_at	Cpt2	1423078_a_at	Sc4mol	1446995_at	Cyp7b1	1422573_at	Ampd3	1448650_a_at	Pole	1436299_at	Gls	1425179_at	Shmt1	1419737_a_at	Ldha	1423159_at	Dld			1423523_at	Aass	1426235_a_at	Glul	1427395_a_at	Aldh1a3	1450970_at	Got1	1452301_at	Aldh3b1	1420437_at	Ido1	1455953_x_at	Pstk	1449435_at	B4galt3	1455191_x_at	Pip5k1a	1422620_s_at	Ppap2a
1449088_at	Fbp2	1450962_at	Pdha2	1451260_at	Aldh1b1	1426584_a_at	Sord	1450269_a_at	Pfkl	1423257_at	Cyp4a14	1460684_at	Tm7sf2	1454987_a_at	H2-Ke6	1423801_a_at	Aprt	1431440_at	Pole2	1448253_at	Glud1	1453421_at	Srr	1455235_x_at	Ldhb	1437612_at				1436689_a_at	Aldh9a1	1436299_at	Gls	1423575_a_at	Wbscr22	1417715_a_at	Got2	1417650_at	Lao1	1428667_at	Maoa	1455951_at	Mars	1426618_a_at	Pomgnt1	1435043_at	Plcb1	1451502_at	Pla2g10
1448470_at	Fbp1	1430402_at	Sucla2	1427960_at	Ugt2b34	1452927_x_at	Tpi1	1416780_at	Pfkm	1418321_at	Dci	1451895_a_at	Dhcr24	1449038_at	Hsd11b1	1453586_at	Entpd1	1449061_a_at	Prim1	1450970_at	Got1	1449064_at	Tdh	1415847_at	Ldhc	1436756_x_at	Hadh			1422979_at	Suv39h2	1448253_at	Glud1	1432384_a_at	Mettl6	1427552_a_at	Gstz1	1434354_at	Maob	1451274_at	Ogdh	1455991_at	Ccbl2	1424934_at	Ugt2b1	1452481_at	Plcb2	1420674_at	Pla2g2e
1417880_at	G6pc	1427441_a_at	Suclg2	1426706_s_at	Xylb	1448495_at	Tsta3	1448941_at	B4galt2	1447355_at	Acsl1	1460722_at	Soat2	1416761_at	Hsd11b2	1418259_a_at	Entpd2	1418035_a_at	Prim2	1417715_a_at	Got2	1423569_at	Gatm	1421260_a_at	Srm	1438391_x_at	Hsd17b10			1426406_at	Setd8	1450970_at	Got1	1452301_at	Aldh3b1	1458049_at	Hgd	1451557_at	Tat	1418697_at	Inmt	1423869_s_at	Txnrd3	1450133_at	Ugt2a3	1448661_at	Plcb3	1434852_at	Pla2g2f
AFFX-GapdhMur/M32599_5_at	Gapdh	1415891_at	Suclg1	1430332_a_at	Gusb	1430780_a_at	Pmm1	1430634_a_at	Pfkp	1436756_x_at	Hadh	1451457_at	Sc5d	1449392_at	Hsd17b1	1460433_at	Entpd6	1417041_at	Polr1c	1451095_at	Asns	1428780_at	Tha1	1448609_at	Tst	1424639_a_at	Hmgcl			1451260_at	Aldh1b1	1417715_a_at	Got2	1430287_s_at	Hemk1	1424618_at	Hpd			1419524_at	Tph1	1439811_at	Mtr	1448384_at	Pofut2	1425338_at	Plcb4	1430700_a_at	Pla2g7
1449974_at	Gapdhs	1448630_a_at	Sdhc	1434486_x_at	Ugp2	1421880_at	Mtmr1	1453283_at	Pgm1	1431012_a_at	Peci	1444138_at	Cyp2r1	1418352_at	Hsd17b2	1458677_at	Entpd5	1416126_at	Polr1b	1418763_at	Nit2	1452311_at	Dmgdh	1425035_s_at	Dnmt3l	1423858_a_at	Hmgcs2			1435437_at	Setd7	1428667_at	Maoa	1448539_a_at	Acy3	1428667_at	Maoa			1425106_a_at	Wars			1426620_at	Chst10	1448432_at	Plcd1	1431802_a_at	Ept1
1450081_x_at	Gpi1	1437489_x_at	Sdhd	1455595_at	Ugt2b36	1431464_a_at	Pmm2	1455798_at	Galk2	1422070_at	Adh4			1421671_at	Hsd17b3	1439012_a_at	Dck	1451120_at	Polr1d	1452830_s_at	Cad	1415673_at	Psph	1418254_at	Apip	1448486_at	Mut			1448382_at	Ehhadh	1458626_at	Nos1	1447380_at	Amdhd1	1416335_at	Mif			1418519_at	Aadat			1424284_at	Pomt1	1432928_at	Plcd4	1420910_at	Ppap2c
1420901_a_at	Hk1	1433293_at	Sdha			1427025_at	Mtmr7	1437240_at	Pgm2	1451828_a_at	Acsl4			1457248_x_at	Hsd17b7	1425893_a_at	Fhit	1417775_at	Polr1a	1454025_at	Ddo	1416049_at	Gldc	1424425_a_at	Mtap	1455061_a_at	Acaa2			1429389_at	Setmar	1420393_at	Nos2	1451260_at	Aldh1b1	1460269_at	Pnmt			1449337_at	Tdo2			1427960_at	Ugt2b34	1442963_at	Plcg1	1431278_s_at	Pla2g6
1422612_at	Hk2	1418005_at	Sdhb			1430634_a_at	Pfkp	1424140_at	Gale	1455061_a_at	Acaa2			1448453_at	Hsd3b1	1424436_at	Gart	1422311_a_at	Polr2a	1448539_a_at	Acy3	1426243_at	Cth	1423705_at	Enoph1	1449001_at	Ivd			1454776_at	Ehmt1	1422622_at	Nos3	1424600_at	Abp1	1420546_at	Th			1436689_a_at	Aldh9a1			1460631_at	Ogt	1416195_at	Inpp5k	1452026_a_at	Pla2g12a
1419737_a_at	Ldha	1432016_a_at	Idh3a			1417579_x_at	Gmppa	1431063_at	Ganc	1436689_a_at	Aldh9a1			1425127_at	Hsd3b2	1435748_at	Gda	1416341_at	Polr2c	1426502_s_at	Gpt	1455985_x_at	Shmt2	1426549_at	Mri1	1436689_a_at	Aldh9a1			1423710_at	Dlst	1416452_at	Oat	1434354_at	Maob	1420600_at	Tpo			1438348_x_at	Ccbl1			1450137_at	Pofut1	1454722_at	Pten	1429514_at	Ppap2b
1455235_x_at	Ldhb	1416090_at	Pdhb			1427903_at	Phpt1	1419146_a_at	Gck	1455446_x_at	Acadsb			1420531_at	Hsd3b5	1436370_at	Gucy2c	1417720_at	Polr2j	1417650_at	Lao1	1434354_at	Maob	1452703_at	Ahcyl2	1423780_at	Hibadh			1451833_a_at	Setdb1	1427364_a_at	Odc1	1460167_at	Aldh7a1	1456095_at	Tyr			1429279_at	Wars2			1451396_at	Pomt2	1452344_at	Synj2	1419614_at	Pla2g12b
1415847_at	Ldhc	1449400_at	Csl			1429519_at	Fpgt	1442798_x_at	Hk3	1451260_at	Aldh1b1			1420447_at	Sult1e1	1422193_at	Gucy2e	1448127_at	Rrm1	1455007_s_at	Gpt2	1460167_at	Aldh7a1	1417650_at	Lao1	1418272_at	Oxct2a			1452341_at	Echs1	1436615_a_at	Otc	1417702_a_at	Hnmt	1415861_at	Tyrp1			1451903_at	Kynu			1434876_at	Gxylt1	1452927_x_at	Tpi1	1453405_at	Pla2g4d
1455209_at	Pck1	1425615_a_at	Pck2			1425459_at	Mtmr2	1434486_x_at	Ugp2	1448382_at	Ehhadh			1421500_at	Sts	1416395_at	Guk1	1434437_x_at	Rrm2	1448350_at	Asl	1448426_at	Sardh	1438759_x_at	Adi1	1455446_x_at	Acadsb			1452173_at	Hadha	1452094_at	P4ha1	1451565_s_at	Uroc1	1422070_at	Adh4			1428885_at	Afmid			1426535_at	Poglut1	1422708_at	Pik3cg	1440207_at	Lpcat4
1418560_at	Pdha1	1423710_at	Dlst			1417085_at	Akr1c6	1439479_at	Lct	1452771_s_at	Acsl3			1419622_at	Ugt2b5	1448736_a_at	Hprt	1416258_at	Tk1	1452375_at	Aldh4a1	1455435_s_at	Chdh	1434247_at	Ldhal6b	1450969_at	Pccb			1443741_x_at	Whsc1	1417149_at	P4ha2	1455561_at	Cndp1	1456118_at	Mettl2			1451260_at	Aldh1b1			1455595_at	Ugt2b36	1423657_at	Cdipt	1416471_at	Cept1
1450962_at	Pdha2	1439459_x_at	Acly			1451540_at	Mpi	1456777_at	Mgam	1435281_at	Cpt1c			1449386_at	Hsd17b6	1416448_at	Itpa	1452681_at	Dtymk	1453065_at	Aldh5a1	1424744_at	Sds	1426243_at	Cth	1419262_at	Acad8			1426888_at	Ehmt2	1417629_at	Prodh			1427395_a_at	Aldh1a3			1448382_at	Ehhadh			1444302_at	Gxylt2	1436848_x_at	Impa1	1448489_at	Pafah2
1450269_a_at	Pfkl	1418886_s_at	Idh3b			1456676_a_at	Pfkfb3			1420684_at	Acox3			1417335_at	Sult2b1	1435277_x_at	Nme1	1450484_a_at	Cmpk2	1435245_at	Gls2	1424995_at	Glyctk	1448196_at	Mat2b	1428140_at	Oxct1			1451271_a_at	Acat1	1420502_at	Sat1			1423575_a_at	Wbscr22			1424600_at	Abp1			1433495_at	Glt25d1	1416460_at	Miox	1451359_at	Lpcat1
1416780_at	Pfkm	1452005_at	Dlat			1442798_x_at	Hk3			1452341_at	Echs1			1450010_at	Hsd17b12	1448808_a_at	Nme2	1438690_at	Tyms	1455540_at	Cps1	1426658_x_at	Phgdh	1426831_at	Ahcyl1	1417227_at	Mccc1			1460167_at	Aldh7a1	1421260_a_at	Srm			1432384_a_at	Mettl6			1452341_at	Echs1			1434819_at	St6gal2	1423230_at	Inpp5e	1435870_at	Chpt1
1426554_a_at	Pgam1	1453601_at	Idh2			1439428_x_at	Gmds			1452173_at	Hadha			1424973_at	Cyp3a25	1449160_at	Npr1	1424399_at	Uck1	1452831_s_at	Ppat	1435838_at	Agxt2	1424744_at	Sds	1451260_at	Aldh1b1			1419618_at	Bbox1	1432099_a_at	Prodh2			1452301_at	Aldh3b1			1452173_at	Hadha			1434531_at	Mgat5b	1416489_at	Pi4k2b	1454918_at	Agps
1438640_x_at	Pgk1					1425486_s_at	Mtmr6			1451271_a_at	Acat1			1423573_at	Srd5a3	1431625_at	Pde1a	1434859_at	Umps	1435838_at	Agxt2			1423667_at	Mat2a	1438477_a_at	Mcee			1450071_at	Ash1l	1437620_x_at	Aldh18a1			1430287_s_at	Hemk1			1418998_at	Kmo			1437930_at	Glt25d2	1456200_at	Ipmk	1456231_at	Pla2g3
1416784_at	Pgk2					1451194_at	Aldob			1460167_at	Aldh7a1			1424934_at	Ugt2b1	1449420_at	Pde1b	1448562_at	Upp1	1433855_at	Abat			1451557_at	Tat	1448382_at	Ehhadh			1420727_a_at	Tmlhe	1436689_a_at	Aldh9a1			1417650_at	Lao1			1417650_at	Lao1			1457043_at	B3galtl	1415977_at	Isyna1	1440684_at	Lpcat2
1417308_at	Pkm2					1454634_at	Fuk			1456011_x_at	Acaa1a			1450133_at	Ugt2a3	1429643_a_at	Pde1c	1459023_at	Nt5e					1439811_at	Mtr	1428021_at	Mccc2			1437353_at	Setd1b	1416400_at	Pycrl			1434354_at	Maob			1432492_a_at	Haao					1431892_a_at	Plcd3	1436090_at	Enpp6
1421258_a_at	Pklr					1456888_at	Pfkfb4			1437031_at	Acsl6			1438699_at	Srd5a1	1433694_at	Pde3b	1429972_s_at	Txnrd2					1418356_at	Mpst	1452341_at	Echs1			1439488_at	Dot1l	1450860_at	Lap3			1451557_at	Tat			1434354_at	Maob					1452398_at	Plce1	1429862_at	Pla2g4e
1452927_x_at	Tpi1					1435929_at	9630033F20Rik			1426522_at	Hadhb			1422960_at	Srd5a2	1421535_a_at	Pde4a	1424486_a_at	Txnrd1					1417125_at	Ahcy	1452173_at	Hadha			1455171_at	Suv420h1	1423569_at	Gatm							1451271_a_at	Acat1					1453069_at	Pik3cb	1431535_at	Plb1
1422070_at	Adh4					1439030_at	Gmppb			1424451_at	Acaa1b			1427960_at	Ugt2b34	1422474_at	Pde4b	1417252_at	Nt5c							1417650_at	Lao1			1424059_at	Suv420h2	1448315_a_at	Pycr2							1460167_at	Aldh7a1					1438019_at	Ippk
1418373_at	Pgam2									1448717_at	Gcdh			1419136_at	Akr1c18	1416843_at	Pde6d	1416563_at	Ctps							1448104_at	Aldh6a1			1427116_at	Setd1a	1430318_at	Sat2							1425778_at	Ido2					1454605_a_at	Pi4k2a
1430634_a_at	Pfkp									1424352_at	Cyp4a12a			1456362_at	Cyp11b1	1451839_a_at	Pde7a	1448574_at	Nme6							1451271_a_at	Acat1			1442085_at	Whsc1l1	1451260_at	Aldh1b1							1435314_at	Tph2					1436333_a_at	Synj1
1436689_a_at	Aldh9a1									1439000_at	Acsbg2			1455100_at	Akr1d1	1418406_at	Pde8a	1448111_at	Ctps2							1460167_at	Aldh7a1			1433495_at	Glt25d1	1427214_at	Agmat							1455991_at	Ccbl2					1448104_at	Aldh6a1
1427395_a_at	Aldh1a3									1428082_at	Acsl5			1455595_at	Ugt2b36	1449403_at	Pde9a	1432436_a_at	Ak3							1447577_x_at	Pcca			1428555_at	Setd2	1424600_at	Abp1							1448717_at	Gcdh					1439197_at	Pi4kb
1451035_a_at	Akr1a4									1424943_at	Cyp4a31			1426064_at	Cyp3a44	1419740_at	Pde6b	1416798_a_at	Nme4							1456011_x_at	Acaa1a			1436120_at	Setdb2	1428722_at	Ckmt2													1435068_at	Pip4k2b
1446542_at	Acss2															1425100_a_at	Pde6g	1417581_at	Dhodh							1433445_x_at	Hmgcs1			1437930_at	Glt25d2	1419173_at	Acy1													1418665_at	Impa2
1453283_at	Pgm1															1440339_at	Enpp1	1426100_a_at	Tk2							1451512_s_at	Hibch			1448717_at	Gcdh	1434354_at	Maob													1432405_a_at	Plcz1
1452301_at	Aldh3b1															1417308_at	Pkm2	1421015_s_at	Pole3							1426522_at	Hadhb					1448350_at	Asl													1416387_at	Pip4k2c
1416090_at	Pdhb															1421258_a_at	Pklr	1435057_x_at	Polr1e							1424451_at	Acaa1b					1460167_at	Aldh7a1													1433941_at	Inpp5j
1437583_x_at	Acss1															1416530_a_at	Pnp	1425689_at	Dpys							1433855_at	Abat					1424556_at	Pycr1													1433605_at	Inpp5a
1437848_x_at	Adpgk															1459319_at	Pola1	1422517_a_at	Znrd1													1452375_at	Aldh4a1													1426733_at	Itpk1
1437240_at	Pgm2															1448369_at	Pola2	1418737_at	Nudt2													1435245_at	Gls2													1435003_at	Pi4ka
1451260_at	Aldh1b1															1448187_at	Pold1	1417138_s_at	Polr2e													1425230_at	Nags													1425580_a_at	Pik3c3
1425615_a_at	Pck2															1448277_at	Pold2	1423073_at	Cmpk1													1455540_at	Cps1													1427900_at	Pip5kl1
1419146_a_at	Gck															1448650_a_at	Pole	1423371_at	Pole4													1439649_at	Adc													1424037_at	Itpka
1434247_at	Ldhal6b															1431440_at	Pole2	1456731_x_at	Polr3k													1446951_at	P4ha3													1441416_at	Inpp4b
1460167_at	Aldh7a1															1449061_a_at	Prim1	1424566_s_at	Polr3d													1433518_at	Lcmt2													1426926_at	Plcg2
1442798_x_at	Hk3															1418035_a_at	Prim2	1431761_at	Entpd4																											1421360_at	Inpp4a
1451194_at	Aldob															1416052_at	Prps1	1449155_at	Polr3g																											1441058_at	Itpkb
1452005_at	Dlat															1417041_at	Polr1c	1416270_at	Polr2g																											1438284_at	Ocrl
1420118_s_at																1416126_at	Polr1b	1426839_at	Pold3
																1451120_at	Polr1d	1424646_at	Uckl1
																1417775_at	Polr1a	1424258_at	Polr2d
																1422311_a_at	Polr2a	1452830_s_at	Cad
																1416341_at	Polr2c	1427885_at	Pold4
																1417720_at	Polr2j	1415754_at	Polr2f
																1448127_at	Rrm1	1451364_at	Polr3gl
																1434437_x_at	Rrm2	1428494_a_at	Polr2i
																1422604_at	Uox	1439075_at	Polr3f
																1451006_at	Xdh	1452949_at	Polr3b
																1423239_at	Impdh1	1427715_a_at	Nt5c1b
																1459023_at	Nt5e	1444288_at	Pnpt1
																1415890_at	Papss1	1429550_at	Entpd8
																1434510_at	Papss2	1427357_at	Cda
																1419390_at	Pde10a	1453256_at	Polr3c
																1425228_a_at	Dguok	1422727_at	Nme5
																1450213_at	Pde7b	1433709_at	Cant1
																1417252_at	Nt5c	1451548_at	Upp2
																1448651_at	Nudt5	1448614_at	Nt5c2
																1420872_at	Gucy1b3	1424228_at	Polr3h
																1448574_at	Nme6	1457980_x_at	Uck2
																1431913_a_at	Pde3a	1427945_at	Dpyd
																1416798_a_at	Nme4	1460244_at	Upb1
																1421015_s_at	Pole3	1453767_a_at	Nt5m
																1434141_at	Gucy1a3	1431306_at	Nt5c3
																1435057_x_at	Polr1e	1419270_a_at	Dut
																1422517_a_at	Znrd1	1418217_at	Nme7
																1448530_at	Gmpr	1434049_at	Entpd3
																1450987_a_at	2310004I24Rik	1434453_at	Polr3a
																1418737_at	Nudt2	1433552_a_at	Polr2b
																1417138_s_at	Polr2e	1423869_s_at	Txnrd3
																1457774_at	2310079N02Rik	1454659_at	Dctd
																1453283_at	Pgm1	1437222_x_at	Rrm2b
																1423371_at	Pole4
																1456731_x_at	Polr3k
																1423565_at	Paics
																1424566_s_at	Polr3d
																1431761_at	Entpd4
																1449155_at	Polr3g
																1416270_at	Polr2g
																1426839_at	Pold3
																1424258_at	Polr2d
																1427885_at	Pold4
																1415754_at	Polr2f
																1451364_at	Polr3gl
																1428494_a_at	Polr2i
																1439075_at	Polr3f
																1452949_at	Polr3b
																1427715_a_at	Nt5c1b
																1444288_at	Pnpt1
																1429550_at	Entpd8
																1437240_at	Pgm2
																1428164_at	Nudt9
																1453256_at	Polr3c
																1453203_at	Prps1l1
																1422727_at	Nme5
																1433709_at	Cant1
																1448614_at	Nt5c2
																1455186_a_at	1190003J15Rik
																1450765_a_at	Pde6h
																1430781_at	Ak7
																1424228_at	Polr3h
																1432104_a_at	Allc
																1453767_a_at	Nt5m
																1418098_at	Adcy4
																1421960_at	Adcy3
																1416356_at	Gmpr2
																1431306_at	Nt5c3
																1428506_at	Atic
																1426757_at	Ampd2
																1420638_at	Prps2
																1450830_a_at	Pde6c
																1418217_at	Nme7
																1447708_x_at	Pde2a
																1427302_at	Enpp3
																1455462_at	Adcy2
																1434049_at	Entpd3
																1435741_at	Pde8b
																1434453_at	Polr3a
																1447696_x_at	Adcy5
																1450415_at	Pde6a
																1433567_at	Gmps
																1434138_at	Prune
																1434722_at	Ampd1
																1457032_at	Ak5
																1427191_at	Npr2
																1452831_s_at	Ppat
																1433552_a_at	Polr2b
																1429579_at	6330407I18Rik
																1455496_at	Pfas
																1459311_at	Pde4d
																1454430_at	Pde11a
																1455970_at	Pde5a
																1439613_at	Adcy10
																1437222_x_at	Rrm2b
																1456487_at	Adcy1
[truncated: 116 more columns]

## Sheet: 12down
00512: Mucin type O-Glycan biosynthesis(25)		00790: Folate biosynthesis(11)		00983: Drug metabolism - other enzymes(39)		03010: Ribosome(53)		04020: Calcium signaling pathway(166)		04060: Cytokine-cytokine receptor interaction(218)		04270: Vascular smooth muscle contraction(110)		04330: Notch signaling pathway(45)		04340: Hedgehog signaling pathway(54)		04514: Cell adhesion molecules (CAMs)(128)		04610: Complement and coagulation cascades(67)		04916: Melanogenesis(95)		04975: Fat digestion and absorption(43)		05020: Prion diseases(34)		05143: African trypanosomiasis(30)		05144: Malaria(43)		05412: Arrhythmogenic right ventricular cardiomyopathy (ARVC)(73)
ID	Gene Symbol	ID	Gene Symbol	ID	Gene Symbol	ID	Gene Symbol	ID	Gene Symbol	ID	Gene Symbol	ID	Gene Symbol	ID	Gene Symbol	ID	Gene Symbol	ID	Gene Symbol	ID	Gene Symbol	ID	Gene Symbol	ID	Gene Symbol	ID	Gene Symbol	ID	Gene Symbol	ID	Gene Symbol	ID	Gene Symbol
1423236_at	Galnt1	1423611_at	Alpl	1418821_at	Cyp2a12	1419441_at	Rplp0	1450299_at	Chrna7	1448460_at	Acvr1	1422340_a_at	Actg2	1421858_at	Adam17	1423635_at	Bmp2	1437467_at	Alcam	1417867_at	Cfd	1418128_at	Adcy6	1421839_at	Abca1	1416837_at	Bax	1419233_x_at	Apoa1	1450883_a_at	Cd36	AFFX-b-ActinMur/M12481_5_at	Actb
1417588_at	Galnt3	1450572_at	Akp3	1416809_at	Cyp3a11	1417452_a_at	Fau	1456307_s_at	Adcy7	1422098_at	Acvr1b	1444105_at	Acta2	1459804_at	Crebbp	1422912_at	Bmp4	1419334_at	Ctla4	1417909_at	Serpinc1	1456307_s_at	Adcy7	1419233_x_at	Apoa1	1417381_at	C1qa	1448931_at	F2rl1	1416330_at	Cd81	1415779_s_at	Actg1
1423637_at	Galnt4	1450636_s_at	Alppl2	1419523_at	Cyp3a13	1431766_x_at	Rps2	1418754_at	Adcy8	1437382_at	Acvr2a	1418128_at	Adcy6	1415702_a_at	Ctbp1	1421282_at	Bmp5	1418770_at	Cd2	1450586_at	Bdkrb1	1418754_at	Adcy8	1417761_at	Apoa4	1417063_at	C1qb	1460251_at	Fas	1419527_at	Comp	1448327_at	Actn2
1460431_at	Gcnt1	1419172_at	Dhfr	1421741_at	Cyp3a16	1431177_a_at	Rpl10a	1434454_at	Adcy9	1439856_at	Acvr2b	1456307_s_at	Adcy7	1422887_a_at	Ctbp2	1450759_at	Bmp6	1419768_at	Cd22	1422263_at	Bdkrb2	1434454_at	Adcy9	1450883_a_at	Cd36	1449401_at	C1qc	1418803_a_at	Fasl	1419427_at	Csf3	1418677_at	Actn3
1441216_at	St3gal1	1460673_at	Fpgs	1416913_at	Ces1c	1450372_a_at	Rpl18	1460710_at	Adora2a	1450573_at	Amh	1418754_at	Adcy8	1419204_at	Dll1	1432410_a_at	Bmp7	1437025_at	Cd28	1416625_at	Serping1	1441734_at	Camk2a	1417257_at	Cel	1449308_at	C6	1428939_s_at	Gnaq	1432273_a_at	Darc	1427250_at	Atp2a2
1421892_at	St3gal2	1420499_at	Gch1	1419510_at	Ces1e	1436995_a_at	Rpl26	1434430_s_at	Adora2b	1422003_at	Cxcr5	1434454_at	Adcy9	1449236_at	Dll3	1449873_at	Bmp8a	1416072_at	Cd34	1417381_at	C1qa	1448676_at	Camk2b	1418295_s_at	Dgat1	1422815_at	C9	1427866_x_at	Hbb-b2	1423016_a_at	Gypa	1421297_a_at	Cacna1c
1421517_at	St6galnac1	1419595_a_at	Ggh	1448736_a_at	Hprt	1448217_a_at	Rpl27	1422183_a_at	Adra1b	1423635_at	Bmp2	1460710_at	Adora2a	1437301_a_at	Dvl1	1440706_at	Bmp8b	1419696_at	Cd4	1417063_at	C1qb	1423941_at	Camk2g	1418438_at	Fabp2	1449297_at	Casp12	1424067_at	Icam1	1427866_x_at	Hbb-b2	1428051_a_at	Cacna1d
1421967_at	B4galt5	1458402_at	Pts	1416448_at	Itpa	1460543_x_at	Rpl37a	1421659_at	Adra1a	1432410_a_at	Bmp7	1434430_s_at	Adora2b	1417207_at	Dvl2	1443142_at	Btrc	1451910_a_at	Cd6	1449401_at	C1qc	1420811_a_at	Ctnnb1	1417556_at	Fabp1	1417065_at	Egr1	1420437_at	Ido1	1442884_at	Hgf	1420442_at	Cacna1s
1416655_at	C1galt1c1	1432372_a_at	Spr	1421758_at	Nat1	1438926_at		1423420_at	Adrb1	1425493_at	Bmpr1a	1422183_a_at	Adra1b	1420457_at	Dvl3	1434959_at	Dhh	1451950_a_at	Cd80	1416051_at	C2	1421582_a_at	Creb1	1417715_a_at	Got2	1421897_at	Elk1	1425947_at	Ifng	1448545_at	Sdc2	1433643_at	Cacna2d1
1417641_at	Galntl5	1431077_at	Alpi	1449981_a_at	Nat2	1416546_a_at	Rpl6	1437302_at	Adrb2	1443720_s_at	Bmpr1b	1421659_at	Adra1a	1458643_at	Dtx1	1416855_at	Gas1	1420404_at	Cd86	1419483_at	C3ar1	1419979_s_at	Creb3	1419399_at	Mttp	1417558_at	Fyn	1450330_at	Il10	1424067_at	Icam1	1419225_at	Cacna2d3
1453630_at	Galnt14	1423664_at	Qdpr	1422961_at	Nat3	1427452_at	Gm5045 /// Rpl7	1455918_at	Adrb3	1419616_at	Bmpr2	1436739_at	Agtr1a	1422972_s_at	Kat2a	1449058_at	Gli1	1451673_at	Cd8a	1418037_at	C4bp	1459804_at	Crebbp	1416626_at	Pla2g1b	1427464_s_at	Hspa5	1425454_a_at	Il12a	1425947_at	Ifng	1425777_at	Cacnb1
1430963_at	Gcnt3			1416258_at	Tk1	1436798_at	Rpl9	1436739_at	Agtr1a	1450357_a_at	Ccr6	1446527_at	Agtr1b	1439704_at	Hdac2	1459211_at	Gli2	1426170_a_at	Cd8b1	1439902_at	C5ar1	1418028_at	Dct	1450128_at	Pla2g2a	1419407_at	Hc	1449497_at	Il12b	1450330_at	Il10	1456401_at	Cacnb2
1429235_at	Galntl2			1430889_a_at	Tpmt	1436586_x_at	Rps14	1446527_at	Agtr1b	1421734_at	Cxcr2	1428607_at	Araf	1418102_at	Hes1	1455154_at	Gli3	1448261_at	Cdh1	1449308_at	C6	1437301_a_at	Dvl1	1420584_at	Pla2g2c	1421473_at	Il1a	1417932_at	Il18	1425454_a_at	Il12a	1448656_at	Cacnb3
1428490_at	C1galt1			1419622_at	Ugt2b5	1455835_at	Rps16	1455069_x_at	Slc25a4	1449925_at	Cxcr3	1437628_s_at	Rhoa	1456010_x_at	Hes5	1427133_s_at	Lrp2	1418602_at	Cdh15	1422815_at	C9	1417207_at	Dvl2	1418987_at	Pla2g2d	1449399_a_at	Il1b	1449399_a_at	Il1b	1417932_at	Il18	1436912_at	Cacnb4
1425610_s_at	Galnt2			1424399_at	Uck1	1438501_at	Rps17	1434801_x_at	Slc25a5	1448710_at	Cxcr4	1421297_a_at	Cacna1c	1434070_at	Jag1	1455277_at	Hhip	1418815_at	Cdh2	1429830_a_at	Cd59a	1420457_at	Dvl3	1448558_a_at	Pla2g4a	1450297_at	Il6	1450297_at	Il6	1449399_a_at	Il1b	1422813_at	Cacng1
1452232_at	Galnt7			1434859_at	Umps	1421838_at	Rps18	1419312_at	Atp2a1	1419610_at	Ccr1	1428051_a_at	Cacna1d	1426431_at	Jag2	1450704_at	Ihh	1426673_at	Cdh3	1450876_at	Cfh	1451924_a_at	Edn1	1417814_at	Pla2g5	1426865_a_at	Ncam1	1424807_at	Lama4	1450297_at	Il6	1420596_at	Cacng2
1416760_at	Galntl1			1448562_at	Upp1	1449243_a_at	Rps19	1427250_at	Atp2a2	1436065_at	Ccr9	1420442_at	Cacna1s	1420643_at	Lfng	1450519_a_at	Prkaca	1456397_at	Cdh4	1418724_at	Cfi	1423594_a_at	Ednrb	1415777_at	Pnliprp1	1421593_at	Ncam2	1419272_at	Myd88	1435560_at	Itgal	1448149_at	Ctnna1
1418194_at	Galnt10			1451006_at	Xdh	1456628_x_at	Rps24	1433888_at	Atp2b2	1422349_at	Ccr1l1	1423257_at	Cyp4a14	1416992_at	Mfng	1420610_at	Prkacb	1433956_at	Cdh5	1425289_a_at	Cr2	1437284_at	Fzd1	1437438_x_at	Pnliprp2	1418633_at	Notch1	1437393_at	Prkca	1450678_at	Itgb2	1448895_a_at	Ctnna2
1434399_at	Galnt6			1423239_at	Impdh1	1438859_x_at	Rps29	1450586_at	Bdkrb1	1422957_at	Ccr3	1440093_at	Ednra	1418633_at	Notch1	1451299_at	Prkx	1437932_a_at	Cldn1	1430131_at	Cr1l	1438101_at	Fzd3	1422620_s_at	Ppap2a	1450519_a_at	Prkaca	1460419_a_at	Prkcb	1449829_at	Itgb2l	1420811_a_at	Ctnnb1
1437760_at	Galnt12			1424973_at	Cyp3a25	1422475_a_at	Gm10119 /// Gm9000 /// Rps3a	1422263_at	Bdkrb2	1421187_at	Ccr2	1434254_at	Gna11	1455556_at	Notch2	1439663_at	Ptch1	1417232_at	Cldn2	1460242_at	Cd55	1419301_at	Fzd4	1437378_x_at	Scarb1	1420610_at	Prkacb	1421446_at	Prkcc	1448655_at	Lrp1	1418815_at	Cdh2
1424748_at	Galnt11			1426100_a_at	Tk2	1420303_x_at	Rps4x	1449454_at	Bst1	1421655_a_at	Ccr4	1439206_at	Gna12	1421965_s_at	Notch3	1422655_at	Ptch2	1434651_a_at	Cldn3	1430457_at	Daf2	1455604_at	Fzd5	1451502_at	Pla2g10	1451299_at	Prkx	1435043_at	Plcb1	1434447_at	Met	1456131_x_at	Dag1
1454780_at	Galntl4			1425689_at	Dpys	1416054_at	Rps5	1459996_at	Cacna1a	1422260_x_at	Ccr5	1422555_s_at	Gna13	1449146_at	Notch4	1452113_a_at	Rab23	1418283_at	Cldn4	1418993_s_at	F10	1448662_at	Fzd6	1424441_at	Slc27a4	1416130_at	Prnp	1452481_at	Plcb2	1419272_at	Myd88	1426731_at	Des
1442272_at	Galntl6			1432406_at	Ces5a	1453466_at	Rps6	1425812_a_at	Cacna1b	1423466_at	Ccr7	1428939_s_at	Gnaq	1425368_a_at	Numb	1427571_at	Shh	1417839_at	Cldn5	1419131_at	F13b	1450043_at	Fzd7	1420674_at	Pla2g2e	1418126_at	Ccl5	1448661_at	Plcb3	1421287_a_at	Pecam1	1448665_at	Dmd
1457045_at	Galnt13			1424646_at	Uckl1	1435593_x_at	Rps7	1421297_a_at	Cacna1c	1422291_at	Ccr8	1453413_at	Gnas	1416491_at	Numbl	1422228_at	Wnt8a	1452981_at	Cntn1	1418897_at	F2	1423348_at	Fzd8	1434852_at	Pla2g2f	1459976_s_at	Sod1	1425338_at	Plcb4	1421712_at	Sele	1426911_at	Dsc2
1456680_at	B3gnt6			1424934_at	Ugt2b1	1455485_x_at	Rpl13a	1428051_a_at	Cacna1d	1421420_at	Ccr10	1460203_at	Itpr1	1434037_s_at	Kat2b	1425377_at	Wnt1	1427256_at	Vcan	1437308_s_at	F2r	1427529_at	Fzd9	1419393_at	Abcg5	1415909_at	Stip1	1421712_at	Sele	1420558_at	Selp	1439476_at	Dsg2
				1450133_at	Ugt2a3	1452701_x_at	Uba52	1421692_at	Cacna1e	1417625_s_at	Cxcr7	1424834_s_at	Itpr2	1450399_at	Psen1	1460657_at	Wnt10a	1424825_a_at	Glycam1	1417408_at	F3	1427510_at	Gnai1	1420910_at	Ppap2c	1416351_at	Map2k1	1419607_at	Tnf	1437279_x_at	Sdc1	1417357_at	Emd
				1427357_at	Cda	1419799_at		1423365_at	Cacna1g	1419429_at	Cntfr	1417297_at	Itpr3	1431542_at	Psen2	1426091_a_at	Wnt10b	1438858_x_at	H2-Aa	1418907_at	F5	1419449_a_at	Gnai2	1431278_s_at	Pla2g6	1415974_at	Map2k2	1451314_a_at	Vcam1	1420853_at	Sdc3	1438973_x_at	Gja1
				1424968_at	Ces2g	1417762_a_at	Rpl8	1420442_at	Cacna1s	1425154_a_at	Csf1	1424848_at	Kcnma1	1421760_at	Ptcra	1450772_at	Wnt11	1425477_x_at	H2-Ab1	1419321_at	F7	1437225_x_at	Gnai3	1421025_at	Agpat1	1426585_s_at	Mapk1	1448907_at	Thop1	1448793_a_at	Sdc4	1450501_at	Itga2
				1451548_at	Upp2	1447563_at	Rps3	1441734_at	Camk2a	1423593_a_at	Csf1r	1422838_at	Kcnu1	1448957_at	Rbpj	1443197_at	Wnt9b	1450531_at	H2-Bl	1449558_at	F8	1448031_at	Gnao1	1452026_a_at	Pla2g12a	1427060_at	Mapk3	1422083_at	Tlr9	1445360_at	Tgfb1	1417758_at	Itga2b
				1457980_x_at	Uck2	1424000_a_at	Rps11	1448676_at	Camk2b	1427429_at	Csf2	1421401_at	Kcnmb1	1450433_at	Rbpjl	1449425_at	Wnt2	1452544_x_at	H2-D1	1427393_at	F9	1428939_s_at	Gnaq	1420656_at	Abcg8	1451625_a_at	C8g	1425778_at	Ido2	1450922_a_at	Tgfb2	1455158_at	Itga3
				1427945_at	Dpyd	1451101_a_at	Rps28	1423941_at	Camk2g	1420703_at	Csf2ra	1440403_at	Arhgef1	1421160_a_at	Rfng	1421465_at	Wnt2b	1417025_at	H2-Eb1	1424279_at	Fga	1453413_at	Gnas	1428821_at	Agpat2	1427472_a_at	C8b			1417455_at	Tgfb3	1427615_at	Itga4
				1427960_at	Ugt2b34	1460699_at	Rps27	1441974_at	Camk4	1455660_at	Csf2rb	1422245_a_at	Mrvi1	1448893_at	Ncor2	1450763_x_at	Wnt3	1427746_x_at	H2-K1	1419407_at	Hc	1422407_s_at	Hras1	1416040_at	Lipf	1452388_at	Hspa1a			1460302_at	Thbs1	1458996_at	Itga5
				1460244_at	Upb1	1449398_at	Rpl3l	1421195_at	Cckar	1449360_at	Csf2rb2	1418122_at	Myh11	1421826_at	Dll4	1422093_at	Wnt3a	1450587_at	H2-M10.1	1418680_at	Serpind1	1415900_a_at	Kit	1422678_at	Dgat2	1423886_at	Lamc1			1450663_at	Thbs2	1422444_at	Itga6
				1449081_at	Ces1d	1460175_at	Rps23	1460663_at	Cckbr	1419427_at	Csf3	1435041_at	Myl6	1444532_at	Ncstn	1450782_at	Wnt4	1421358_at	H2-M3	1449034_at	Klkb1	1426228_at	Kras	1429514_at	Ppap2b	1428012_at	C8a			1416623_at	Thbs3	1418393_a_at	Itga7
				1430332_a_at	Gusb	1454833_at	Rpl35	1433741_at	Cd38	1418806_at	Csf3r	1453163_at	Ppp1r12a	1415679_at	Psenen	1436791_at	Wnt5a	1450529_at	H2-M9	1426045_at	Kng1	1454734_at	Lef1	1433431_at	Pnlip					1449388_at	Thbs4	1452784_at	Itgav
				1433567_at	Gmps	1417615_a_at	Rpl11	1450833_at	Chrm1	1449093_at	Ctf1	1449160_at	Npr1	1429003_at	Snw1	1439373_x_at	Wnt5b	1459872_x_at	H2-DMa	1438602_s_at	Masp1	1422069_at	Mc1r	1419614_at	Pla2g12b					1430695_at	Tlr4	1452545_a_at	Itgb1
				1455595_at	Ugt2b36	1439374_x_at	Rps10	1422258_at	Chrm3	1450020_at	Cx3cr1	1450519_a_at	Prkaca	1423375_at	Cir1	1435980_x_at	Wnt6	1443687_x_at	H2-DMb2	1451759_at	Masp2	1415855_at	Kitl	1453405_at	Pla2g4d					1419607_at	Tnf	1421511_at	Itgb3
				1427137_at	Ces2e	1438626_x_at	Rpl14	1456051_at	Drd1a	1419597_at	Eda	1420610_at	Prkacb	1439429_x_at	Dtx2	1447647_at	Wnt7a	1419297_at	H2-Oa	1419578_at	Mbl1	1455214_at	Mitf	1438612_a_at	Clps					1439221_s_at	Cd40	1417534_at	Itgb5
				1426064_at	Cyp3a44	1415879_a_at	Rplp2	1440093_at	Ednra	1447498_at	Edar	1437393_at	Prkca	1420752_at	Dtx3	1420892_at	Wnt7b	1422201_at	H2-Ob	1418787_at	Mbl2	1422688_a_at	Nras	1455099_at	Mogat2					1422283_at	Cd40lg	1432281_a_at	Itgb6
						1423032_at	LOC100503815 /// LOC100504784 /// Rpl39	1423594_a_at	Ednrb	1418093_a_at	Egf	1460419_a_at	Prkcb	1426769_s_at	Maml1	1421440_at	Wnt8b	1425137_a_at	H2-Q10	1421586_a_at	Cd46	1450519_a_at	Prkaca	1456231_at	Pla2g3					1451314_a_at	Vcam1	1418741_at	Itgb7
						1456436_x_at	Rps20	1435888_at	Egfr	1435888_at	Egfr	1421446_at	Prkcc	1455711_at	Dtx4	1421301_at	Zic2	1422160_at	H2-T24	1419149_at	Serpine1	1420610_at	Prkacb	1438514_at	Npc1l1					1419132_at	Tlr2	1426873_s_at	Jup
						1433472_x_at	Rpl38	1424919_at	Erbb2	1423344_at	Epor	1422847_a_at	Prkcd	1435793_at	Aph1b	1420848_at	Sufu	1427726_at	H2-D1	1415806_at	Plat	1437393_at	Prkca	1457554_at	Apob					1423878_at	Gypc	1426285_at	Lama2
						1425183_a_at	Rpl4	1434606_at	Erbb3	1460251_at	Fas	1452878_at	Prkce	1439825_at	Dtx3l	1435373_at	Csnk1e	1448545_at	Sdc2	1422138_at	Plau	1460419_a_at	Prkcb	1429862_at	Pla2g4e					1422083_at	Tlr9	1454734_at	Lef1
						1450925_a_at	Rps27l	1427783_at	Erbb4	1418803_a_at	Fasl	1434248_at	Prkch	1424980_s_at	Aph1a	1437001_at	Gsk3b	1424067_at	Icam1	1452521_a_at	Plaur	1421446_at	Prkcc									1426868_x_at	Lmna
						1455578_x_at	Rpl41	1437308_s_at	F2r	1449528_at	Figf	1426044_a_at	Prkcq	1448246_at	Hdac1	1429383_at	Csnk1g3	1448862_at	Icam2	1416729_at	Plg	1435043_at	Plcb1									1421126_at	Ryr2
						1417126_a_at	Rpl22l1	1434254_at	Gna11	1419300_at	Flt1	1416626_at	Pla2g1b			1424827_a_at	Csnk1a1	1427615_at	Itga4	1417498_at	Serpinf2	1452481_at	Plcb2									1422654_at	Sgca
						1423327_at	Rpl39l	1449848_at	Gna14	1419538_at	Flt3	1450128_at	Pla2g2a			1422941_at	Wnt16	1422444_at	Itga6	1418845_at	Proc	1448661_at	Plcb3									1437675_at	Slc8a1
						1460354_a_at	Mrpl13	1421302_a_at	Gna15	1444052_at	Flt4	1420584_at	Pla2g2c			1423370_a_at	Csnk1g2	1435560_at	Itgal	1426246_at	Pros1	1425338_at	Plcb4									1450461_at	Tcf7
						1430978_at	Rps25	1439957_at	Gnal	1419139_at	Gdf5	1418987_at	Pla2g2d			1425462_at	Fbxw11	1422046_at	Itgam	1420553_x_at	Serpina1a	1433800_a_at	Pomc									1436207_at	Tcf7l1
						1428152_a_at	Rpl18a	1428939_s_at	Gnaq	1451501_a_at	Ghr	1448558_a_at	Pla2g4a			1437690_x_at	Csnk1d	1452784_at	Itgav	1418282_x_at	Serpina1b	1451299_at	Prkx									1429427_s_at	Tcf7l2
						1434624_x_at	Rps9	1453413_at	Gnas	1457644_s_at	Cxcl1	1417814_at	Pla2g5			1428806_at	Csnk1g1	1452545_a_at	Itgb1	1448680_at	Serpina1c	1422228_at	Wnt8a									1419667_at	Sgcb
						1424377_at	Rsl24d1	1450202_at	Grin1	1442884_at	Hgf	1435043_at	Plcb1			1436978_at	Wnt9a	1450678_at	Itgb2	1451791_at	Tfpi	1450461_at	Tcf7									1450805_at	Sgcd
						1453752_at	Rpl17	1421616_at	Grin2a	1418930_at	Cxcl10	1452481_at	Plcb2			1453584_at	Stk36	1449829_at	Itgb2l	1448529_at	Thbd	1436207_at	Tcf7l1									1421254_a_at	Sgcg
								1449245_at	Grin2c	1450564_x_at	Ifna1	1448661_at	Plcb3			1427049_s_at	Smo	1418741_at	Itgb7	1435386_at	Vwf	1429427_s_at	Tcf7l2									1450520_at	Cacng3
								1442328_at	Grin2d	1423028_at	Ifna2	1425338_at	Plcb4					1424595_at	F11r	1424041_s_at	C1s	1456095_at	Tyr									1455230_at	Cacng4
								1425700_at	Grm1	1422408_at	Ifna4	1460165_at	Ppp1ca					1450435_at	L1cam	1417009_at	C1ra	1415861_at	Tyrp1									1425730_at	Cacng6
								1421470_at	Grpr	1450614_x_at	Ifna5	1426205_at	Ppp1cb					1425253_a_at	Madcam1	1432834_at	Cpb2	1425377_at	Wnt1									1449955_at	Cacna1f
								1438494_at	Hrh1	1422406_at	Ifna9	1452046_a_at	Ppp1cc					1460219_at	Mag	1420496_at	F12	1460657_at	Wnt10a									1451955_a_at	Cacna2d2
								1423639_at	Hrh2	1450613_x_at	Ifnab	1444232_at	LOC100503436 /// Prkg1					1423253_at	Mpz	1451625_a_at	C8g	1426091_a_at	Wnt10b									1423449_a_at	Actn4
								1422125_at	Htr2b	1449026_at	Ifnar1	1451299_at	Prkx					1426865_a_at	Ncam1	1448929_at	F13a1	1450772_at	Wnt11									1449799_s_at	Pkp2
								1435513_at	Htr2c	1451462_a_at	Ifnar2	1427313_at	Ptgir					1421593_at	Ncam2	1416025_at	Fgg	1443197_at	Wnt9b									1439745_at	Cacng7
								1443365_at	Htr4	1422305_at	Ifnb1	1423445_at	Rock1					1447693_s_at	Neo1	1451788_at	F11	1449425_at	Wnt2									1459579_at	Cacng8
								1422207_at	Htr5a	1425947_at	Ifng	1451041_at	Rock2					1428240_at	Nrxn1	1428079_at	Fgb	1421465_at	Wnt2b									1450029_s_at	Itga9
								1422196_at	Htr5b	1448167_at	Ifngr1	1422204_at	Avpr1b					1435907_at	Nrxn2	1427472_a_at	C8b	1450763_x_at	Wnt3									1435493_at	Dsp
								1421757_at	Htr6	1423557_at	Ifngr2	1416351_at	Map2k1					1438193_at	Nrxn3	1428012_at	C8a	1422093_at	Wnt3a									1439713_at	Itga1
								1435332_at	Htr7	1450330_at	Il10	1415974_at	Map2k2					1440220_at	Ocln	1434719_at	A2m	1450782_at	Wnt4									1428585_at	Actn1
								1460203_at	Itpr1	1437808_x_at	Il10ra	1426585_s_at	Mapk1					1416003_at	Cldn11	1418813_at	Serpina5	1436791_at	Wnt5a									1426330_at	Cacng5
								1424834_s_at	Itpr2	1429959_at		1427060_at	Mapk3					1449835_at	Pdcd1			1439373_x_at	Wnt5b									1427387_a_at	Itgb4
								1417297_at	Itpr3	1449982_at	Il11	1451502_at	Pla2g10					1421287_a_at	Pecam1			1435980_x_at	Wnt6									1440235_at	Itga10
								1450192_at	Lhcgr	1425454_a_at	Il12a	1420674_at	Pla2g2e					1440165_at	Ptprc			1447647_at	Wnt7a									1441193_at	Ctnna3
								1458626_at	Nos1	1449497_at	Il12b	1434852_at	Pla2g2f					1420842_at	Ptprf			1420892_at	Wnt7b									1427489_at	Itga8
								1420393_at	Nos2	1418166_at	Il12rb1	1431413_at	Ramp1					1422541_at	Ptprm			1421440_at	Wnt8b									1457703_at	Cacna2d4
								1422622_at	Nos3	1421623_at	Il12rb2	1431278_s_at	Pla2g6					1424456_at	Pvrl2			1416351_at	Map2k1									1436223_at	Itgb8
								1420799_at	Ntsr1	1420802_at	Il13	1418604_at	Avpr1a					1421712_at	Sele			1415974_at	Map2k2
								1440888_at	Oxtr	1425625_at	Il13ra1	1420872_at	Gucy1b3					1417087_at	Glg1			1426585_s_at	Mapk1
								1429794_a_at	P2rx1	1418219_at	Il15	1418187_at	Ramp2					1419481_at	Sell			1427060_at	Mapk3
								1452527_a_at	P2rx4	1422397_a_at	Il15ra	1418489_a_at	Calcrl					1420558_at	Selp			1419295_at	Creb3l1
								1419853_a_at	P2rx7	1421672_at	Il17a	1449955_at	Cacna1f					1449127_at	Selplg			1420516_at	a
								1450327_at	P2rx6	1420904_at	Il17ra	1420401_a_at	Ramp3					1427668_at	Siglec1			1437001_at	Gsk3b
								1431625_at	Pde1a	1417932_at	Il18	1449471_at	Kcnmb4					1439034_at	Spn			1418534_at	Fzd2
								1449420_at	Pde1b	1456545_at	Il18rap	1434141_at	Gucy1a3					1437279_x_at	Sdc1			1418608_at	Calml3
								1429643_a_at	Pde1c	1421473_at	Il1a	1452026_a_at	Pla2g12a					1420853_at	Sdc3			1424218_a_at	Creb3l4
								1421917_at	Pdgfra	1449399_a_at	Il1b	1418086_at	Ppp1r14a					1448793_a_at	Sdc4			1450633_at	Calm4
								1436970_a_at	Pdgfrb	1459777_at	Il1r1	1453853_a_at	Arhgef12					1435166_at	Cntn2			1422941_at	Wnt16
								1422743_at	Phka1	1419532_at	Il1r2	1419614_at	Pla2g12b					1439221_s_at	Cd40			1440182_at	Fzd10
								1425164_a_at	Phkg1	1421844_at	Il1rap	1418608_at	Calml3					1422283_at	Cd40lg			1418098_at	Adcy4
								1450519_a_at	Prkaca	1421628_at	Il18r1	1431844_at	Kcnmb2					1451314_a_at	Vcam1			1421960_at	Adcy3
								1420610_at	Prkacb	1449990_at	Il2	1453405_at	Pla2g4d					1419212_at	Icosl			1456844_at	Camk2d
								1437393_at	Prkca	1420691_at	Il2ra	1450633_at	Calm4					1421580_at	Cntnap1			1425419_a_at	Raf1
								1460419_a_at	Prkcb	1448759_at	Il2rb	1452670_at	Myl9					1448393_at	Cldn7			1437396_at	Creb3l2
								1421446_at	Prkcc	1416296_at	Il2rg	1418098_at	Adcy4					1421931_at	Icos			1424688_at	Creb3l3
								1435043_at	Plcb1	1450566_at	Il3	1421960_at	Adcy3					1417845_at	Cldn6			1455462_at	Adcy2
								1452481_at	Plcb2	1419712_at	Il3ra	1425504_at	Mylk					1449091_at	Cldn8			1436978_at	Wnt9a
								1448661_at	Plcb3	1449864_at	Il4	1424769_s_at	Cald1					1417377_at	Cadm1			1447696_x_at	Adcy5
								1425338_at	Plcb4	1421034_a_at	Il4ra	1456505_at	Braf					1420345_at	Cldn14			1456487_at	Adcy1
								1448432_at	Plcd1	1450550_at	Il5	1425419_a_at	Raf1					1425445_a_at	Cldn18
								1432928_at	Plcd4	1421620_at	Il5ra	1455462_at	Adcy2					1450524_at	Cldn9
								1442963_at	Plcg1	1450297_at	Il6	1439101_at	Mylk3					1422920_at	Cldn13
								1423359_at	Pln	1422270_a_at	Il6ra	1443539_at	Arhgef11					1426147_s_at	Cldn10
								1438478_a_at	Ppp3ca	1460295_s_at	Il6st	1430661_at	Myl6b					1450290_at	Pdcd1lg2
								1428474_at	Ppp3cb	1436861_at	Il7	1447696_x_at	Adcy5					1438111_at	Pvrl1
								1420743_a_at	Ppp3cc	1448576_at	Il7r	1427556_at	Mylk2					1421132_at	Pvrl3
								1433591_at	Ppp3r1	1450565_at	Il9	1427191_at	Npr2					1418920_at	Cldn15
								1437535_at	Ppp3r2	1421570_at	Il9r	1429579_at	6330407I18Rik					1419714_at	Cd274
								1451299_at	Prkx	1458291_at	Inhba	1456231_at	Pla2g3					1450758_at	Cntnap2
								1427872_at	Ptafr	1426859_at	Inhbb	1424352_at	Cyp4a12a					1436568_at	Jam2
								1450491_at	Ptger1	1422001_at	Inhbc	1431462_at	Ppp1r12b					1428167_a_at	Mpzl1
								1425251_at	Ptger3	1422144_at	Inhbe	1429862_at	Pla2g4e					1460356_at	Esam
								1440777_x_at	Ptgfr	1449379_at	Kdr	1456487_at	Adcy1					1424409_at	Cldn23
								1434653_at	Ptk2b	1415900_a_at	Kit	1424943_at	Cyp4a31					1432477_at	4930412D23Rik
								1427306_at	Ryr1	1422582_at	Lep							1431639_at	4930468A15Rik
								1421126_at	Ryr2	1456156_at	Lepr							1430237_at	Cldn22
								1427427_at	Ryr3	1450160_at	Lif							1423503_at	Jam3
								1437675_at	Slc8a1	1450207_at	Lifr							1449272_at	Cadm3
								1420566_at		1419412_at	Xcl1							1417599_at	Cd276
								1422282_at	Tacr1	1420353_at	Lta							1450029_s_at	Itga9
								1422234_at	Tacr2	1419135_at	Ltb							1420434_at	Cldn16
								1440803_x_at	Tacr3	1416435_at	Ltbr							1421648_at	Nlgn1
								1419222_at	Tbxa2r	1434447_at	Met							1460013_at	Nlgn2
								1418370_at	Tnnc1	1415855_at	Kitl							1445388_at	Cd226
								1417464_at	Tnnc2	1456907_at	Cxcl9							1427489_at	Itga8
								1449571_at	Trhr	1451919_a_at	Mpl							1425727_at	Cldn19
								1421096_at	Trpc1	1421241_at	Ngfr							1456384_at	Nlgn3
								1437192_x_at	Vdac1	1418309_at	Tnfrsf11b							1459357_at	Nfasc
								1415990_at	Vdac2	1438767_at	Osm							1430583_at	Nrcam
								1416175_a_at	Vdac3	1459217_at	Osmr							1456392_at	Negr1
								1422204_at	Avpr1b	1418711_at	Pdgfa							1436223_at	Itgb8
								1450124_a_at	Atp2a3	1450413_at	Pdgfb							1430514_a_at	Cd99
								1418604_at	Avpr1a	1421917_at	Pdgfra
								1449955_at	Cacna1f	1436970_a_at	Pdgfrb
								1417431_a_at	Sphk2	1429287_a_at	Prl
								1450807_at	Ltb4r2	1421382_at	Prlr
								1427607_at	Cacna1h	1421688_a_at	Ccl1
								1449282_at	Cysltr1	1417789_at	Ccl11
								1452969_at	Atp2b1	1419413_at	Ccl17
								1428511_at	Phkg2	1422029_at	Ccl20
								1421642_a_at	Cysltr2	1417925_at	Ccl22
								1431130_at	2010110P09Rik	1418777_at	Ccl25
								1418608_at	Calml3	1434962_x_at	Ccl27a /// Ccl27b
								1431892_a_at	Plcd3	1419561_at	Ccl3
								1453133_at	Slc25a31	1421578_at	Ccl4
								1452398_at	Plce1	1418126_at	Ccl5
								1450633_at	Calm4	1417266_at	Ccl6
								1449433_at	P2rx5	1421228_at	Ccl7
								1434511_at	Phkb	1417936_at	Ccl9
								1418098_at	Adcy4	1456428_at	Cxcl15
								1421960_at	Adcy3	1449984_at	Cxcl2
								1425504_at	Mylk	1419728_at	Cxcl5
								1456844_at	Camk2d	1415803_at	Cx3cl1
								1455272_at	Grm5	1417574_at	Cxcl12
								1434518_at	Phka2	1445360_at	Tgfb1
								1438262_at	Slc8a2	1450922_a_at	Tgfb2
								1450311_at	Slc8a3	1417455_at	Tgfb3
								1432405_a_at	Plcz1	1420895_at	Tgfbr1
								1450356_at	Trhr2	1422019_at	Tgfbr2
								1455462_at	Adcy2	1419607_at	Tnf
								1439101_at	Mylk3	1422344_s_at	Tnfrsf10b
								1458396_at	P2rx3	1419214_at	Tnfrsf11a
								1424037_at	Itpka	1420782_at	Tnfrsf17
								1427556_at	Mylk2	1422303_a_at	Tnfrsf18
								1435212_at	P2rx2	1417291_at	Tnfrsf1a
								1426926_at	Plcg2	1418099_at	Tnfrsf1b
								1441058_at	Itpkb	1439221_s_at	Cd40
								1442645_at	Atp2b3	1452389_at	Cd27
								1445701_at	Atp2b4	1421649_at	Tnfrsf8
								1456487_at	Adcy1	1460469_at	Tnfrsf9
										1451944_a_at	Tnfsf11
										1422283_at	Cd40lg
										1449926_at	Cd70
										1450272_at	Tnfsf8
										1422924_at	Tnfsf9
										1420600_at	Tpo
										1420412_at	Tnfsf10
										1420351_at	Tnfrsf4
										1421744_at	Tnfsf4
										1420909_at	Vegfa
										1451803_a_at	Vegfb
										1419417_at	Vegfc
										1422294_at	Xcr1
										1445251_at	Tnfsf13b
										1418572_x_at	Tnfrsf12a
										1448147_at	Tnfrsf19
										1420678_a_at	Il17rb
										1421588_at	Tnfsf14
										1450004_at	Tslp
										1449351_s_at	Pdgfc
										1448859_at	Cxcl13
										1419697_at	Cxcl11
										1431693_a_at	Il17b
										1450488_at	Ccl24
										1437271_at	Clcf1
										1448995_at	Pf4
										1450218_at	Ccl28
										1418456_a_at	Cxcl14
										1418480_at	Ppbp
										1418097_a_at	Crlf2
										1423182_at	Tnfrsf13b
										1421608_at	Il20
										1450456_at	Il21r
										1450334_at	Il21
										1418718_at	Cxcl16
										1456532_at	Pdgfd
										1419307_at	Tnfrsf13c
										1425832_a_at	Cxcr6
										1419529_at	Il23a
										1422231_a_at	Tnfrsf25
										1426181_a_at	Il24
										1450731_s_at	Tnfrsf21
										1427989_at	Amhr2
										1420740_at	Il25
										1437876_at	Il20rb
										1445457_at	9130219A07Rik
										1452425_at	Tnfrsf14
										1437665_at	Il22ra2
										1446498_at	Il20ra
										1460598_at	Il28ra
										1440085_at	Eda2r
										1455116_at	Relt

## Sheet: 24up
00140: Steroid hormone biosynthesis(41)		00240: Pyrimidine metabolism(89)		00260: Glycine, serine and threonine metabolism(30)		00270: Cysteine and methionine metabolism(33)		00310: Lysine degradation(43)		00360: Phenylalanine metabolism(16)		00380: Tryptophan metabolism(40)		00562: Inositol phosphate metabolism(56)		00564: Glycerophospholipid metabolism(78)		00565: Ether lipid metabolism(35)		00670: One carbon pool by folate(17)		00770: Pantothenate and CoA biosynthesis(15)		03008: Ribosome biogenesis in eukaryotes(70)		03013: RNA transport(142)		03015: mRNA surveillance pathway(81)		03020: RNA polymerase(24)		03040: Spliceosome(115)		03050: Proteasome(44)		03320: PPAR signaling pathway(71)		04115: p53 signaling pathway(65)		04120: Ubiquitin mediated proteolysis(130)		04145: Phagosome(139)		04612: Antigen processing and presentation(57)		04622: RIG-I-like receptor signaling pathway(58)		04966: Collecting duct acid secretion(26)
ID	Gene Symbol	ID	Gene Symbol	ID	Gene Symbol	ID	Gene Symbol	ID	Gene Symbol	ID	Gene Symbol	ID	Gene Symbol	ID	Gene Symbol	ID	Gene Symbol	ID	Gene Symbol	ID	Gene Symbol	ID	Gene Symbol	ID	Gene Symbol	ID	Gene Symbol	ID	Gene Symbol	ID	Gene Symbol	ID	Gene Symbol	ID	Gene Symbol	ID	Gene Symbol	ID	Gene Symbol	ID	Gene Symbol	ID	Gene Symbol	ID	Gene Symbol	ID	Gene Symbol	ID	Gene Symbol
1449183_at	Comt1	1423326_at	Entpd1	1418833_at	Agxt	1416835_s_at	Amd1	1416468_at	Aldh1a1	1418752_at	Aldh3a1	1421666_a_at	Aanat	1418045_at	Inpp1	1422635_at	Ache	1448578_at	Pafah1b1	1419172_at	Dhfr	1450871_a_at	Bcat1	1419036_at	Csnk2a1	1458906_at		1426736_at	Gspt1	1449648_s_at	Polr1c	1433497_at	Aqr	1425947_at	Ifng	1448988_at	Acadl	1450223_at	Apaf1	1419241_a_at	Aire	1419734_at	Actb	1452428_a_at	B2m	1418235_at	Atg5	1421286_a_at	Atp4a
1439947_at	Cyp11a1	1460433_at	Entpd6	1455282_x_at	Alas1	1423147_at	Mat1a	1448143_at	Aldh2	1449396_at	Aoc3	1416468_at	Aldh1a1	1451330_a_at	Inpp5b	1440070_at	Chat	1422792_at	Pafah1b2	1419670_at	Ftcd	1425764_a_at	Bcat2	1460646_at	Csnk2a2	1424635_at	Eef1a1	1418109_at	Gspt2	1416126_at	Polr1b	1416144_a_at	Dhx15	1450696_at	Psmb9	1415984_at	Acadm	1421205_at	Atm	1421392_a_at	Birc3	1415779_s_at	Actg1	1421211_a_at	Ciita	1424552_at	Casp8	1448911_at	Atp4b
1450574_at	Cyp11b2	1433763_at	Entpd5	1451675_a_at	Alas2	1450624_at	Bhmt	1415776_at	Aldh3a2	1442878_at	Prdx6	1448143_at	Aldh2	1460394_a_at	Inppl1	1448448_a_at	Chkb	1416410_at	Pafah1b3	1441911_x_at	Gart	1459546_s_at	Enpp1	1416728_at	Csnk2b	1418062_at	Eef1a2	1416212_at	Magoh	1448287_at	Polr1d	1433809_at	Ddx5	1422962_a_at	Psmb8	1416409_at	Acox1	1416837_at	Bax	1418854_at	Birc2	1450634_at	Atp6v1a	1433806_x_at	Calr	1417091_at	Chuk	1450634_at	Atp6v1a
1417017_at	Cyp17a1	1428838_a_at	Dck	1449396_at	Aoc3	1423844_s_at	Cbs	1460184_at	Hadh	1426215_at	Ddc	1415776_at	Aldh3a2	1429750_at	Minpp1	1450264_a_at	Chka	1415894_at	Enpp2	1419253_at	Mthfd2	1418486_at	Vnn1	1416393_at	Emg1	1424343_a_at	Eif1a	1452287_at	Msi1	1417775_at	Polr1a	1418526_at	Srsf10	1451056_at	Psmd7	1422651_at	Adipoq	1417045_at	Bid	1426636_a_at	Xiap	1446465_at	Atp6v1b2	1428935_at	Canx	1423043_s_at	Ddx3x	1446465_at	Atp6v1b2
1449920_at	Cyp19a1	1416448_at	Itpa	1450624_at	Bhmt	1448842_at	Cdo1	1456916_at	Nsd1	1437612_at		1419435_at	Aox1	1443655_s_at	Pik3c2a	1450434_s_at	Pcyt1a	1433948_at	Pla2g1b	1434087_at	Mthfr	1436291_a_at	Dpys	1431582_at	Eif6	1420491_at	Eif2s1	1418883_a_at	Pabpc1	1426242_at	Polr2a	1460240_a_at	Hnrnpc	1448206_at	Psma2	1425809_at	Fabp4	1430192_at	Casp3	1451417_at	Brca1	1415671_at	Atp6v0d1	1419696_at	Cd4	1416888_at	Fadd	1415671_at	Atp6v0d1
1422217_a_at	Cyp1a1	1424110_a_at	Nme1	1423844_s_at	Cbs	1447877_x_at	Dnmt1	1445632_at	Ogdh	1450970_at	Got1	1416429_a_at	Cat	1421704_a_at	Pik3c2g	1418578_at	Dgka	1450128_at	Pla2g2a	1425178_s_at	Shmt1	1430813_at	Ppcdc	1422656_at	Rasl2-9-ps	1449940_a_at	Eif2b4	1419500_at	Pabpc2	1416341_at	Polr2c	1436549_a_at	Hnrnpa1	1441707_at	Psma3	1419233_x_at	Apoa1	1424552_at	Casp8	1442495_at		1449712_s_at	Atp6v1e1	1440164_x_at	Cd8a	1418930_at	Cxcl10	1449712_s_at	Atp6v1e1
1432081_at	Cyp1b1	1448808_a_at	Nme2	1420709_s_at	Dao	1419749_at	Trdmt1	1416289_at	Plod1	1417716_at	Got2	1422217_a_at	Cyp1a1	1423144_at	Pik3ca	1448249_at	Gpd1	1420584_at	Pla2g2c	1442192_at	Tyms	1423701_at	Coasy	1424643_at	Tcof1	1416659_at	Eif3a	1424217_at	Papola	1417720_at	Polr2j	1448176_a_at	Hnrnpk	1420053_at	Psmb1	1417950_a_at	Apoa2	1437537_at	Casp9	1446925_at	Btrc	1416328_a_at	Atp6v0e	1426170_a_at	Cd8b1	1450564_x_at	Ifna1	1416328_a_at	Atp6v0e
1422333_at	Cyp21a1	1416530_a_at	Pnp	1433263_at	Dld	1423066_at	Dnmt3a	1449374_at	Pipox	1424618_at	Hpd	1450715_at	Cyp1a2	1453281_at	Pik3cd	1428324_at		1418987_at	Pla2g2d	1424908_at	Mtfmt	1431948_a_at	Pank2	1423884_at	Cirh1a	1427058_at	Eif4a1	1423324_at	Pnn	1419058_at	Polr1e	1455789_x_at	Hspa8	1448632_at	Psmb10	1418278_at	Apoc3	1450920_at	Ccnb2	1450457_at	Cbl	1417632_at	Atp6v0a1	1421582_a_at	Creb1	1423028_at	Ifna2	1417632_at	Atp6v0a1
1416809_at	Cyp3a11	1419397_at	Pola1	1422558_at	Gamt	1418351_a_at	Dnmt3b	1432236_a_at	Suv39h1	1428667_at	Maoa	1432081_at	Cyp1b1	1422994_at	Pikfyve	1417456_at	Gnpat	1448558_a_at	Pla2g4a	1424401_at	Aldh1l1	1457110_at	Pank1	1450308_a_at	Xrn1	1450934_at	Eif4a2	1456390_at	Ppp2ca	1422517_a_at	Znrd1	1419625_at	Hspa1l	1438984_x_at	Psmb4	1418848_at	Aqp7	1448698_at	Ccnd1	1416576_at	Socs3	1435732_x_at	Atp6v0c	1417491_at	Ctsb	1422408_at	Ifna4	1435732_x_at	Atp6v0c
1419523_at	Cyp3a13	1456713_at	Pola2	1417422_at	Gnmt	1437612_at		1418519_at	Aadat	1454481_at	Mif	1426215_at	Ddc	1424954_a_at	Pip5k1c	1425834_a_at	Gpam	1417814_at	Pla2g5	1443021_at	Mthfs	1427945_at	Dpyd	1422843_at	Xrn2	1450908_at	Eif4e	1421823_a_at	Ppp2cb	1417138_s_at	Polr2e	1427126_at	Hspa1b	1415676_a_at	Psmb5	1450779_at	Fabp7	1430127_a_at	Ccnd2	1440047_at	Socs1	1433806_x_at	Calr	1451310_a_at	Ctsl	1450614_x_at	Ifna5	1448752_at	Car2
1421741_at	Cyp3a16	1448187_at	Pold1	1428667_at	Maoa	1419737_a_at	Ldha	1416687_at	Plod2	1454638_a_at	Pah	1437612_at		1449404_at	Pip4k2a	1423960_at	Lpcat3	1437113_s_at	Pld1	1455985_x_at	Shmt2	1460244_at	Upb1	1426214_at	Imp4	1434976_x_at	Eif4ebp1	1455198_a_at	Ppp2r3d	1450737_at	Polr3k	1417101_at	Hspa2	1448822_at	Psmb6	1450883_a_at	Cd36	1415907_at	Ccnd3	1415735_at	Ddb1	1428935_at	Canx	1448591_at	Ctss	1422406_at	Ifna9	1418257_at	Slc12a7
1422100_at	Cyp7a1	1448277_at	Pold2	1449374_at	Pipox	1448237_x_at	Ldhb	1415901_at	Plod3	1448789_at	Aldh1a3	1460184_at	Hadh	1450389_s_at	Pip5k1b	1417043_at	Lcat	1457252_x_at	Pld2	1452811_at	Atic	1448722_s_at	Ppcs	1433656_a_at	Gnl3	1452758_s_at	Eif4g2	1419685_at	Upf1	1424565_at	Polr3d	1416212_at	Magoh	1416240_at	Psmb7	1438156_x_at	Cpt1a	1441910_x_at	Ccne1	1451158_at	Trip12	1417268_at	Cd14	1445330_at	Pdia3	1450613_x_at	Ifnab	1416464_at	Slc4a1
1421075_s_at	Cyp7b1	1448650_a_at	Pole	1425178_s_at	Shmt1	1415846_a_at	Ldhc	1423523_at	Aass	1452301_at	Aldh3b1	1420437_at	Ido1	1426009_a_at	Pip5k1a	1450612_a_at	Pemt	1422620_s_at	Ppap2a	1415916_a_at	Mthfd1	1439260_a_at	Enpp3	1416605_at	Nhp2	1451967_x_at	Kpnb1	1438267_x_at	Rnps1	1449155_at	Polr3g	1416354_at	Rbmx	1439392_x_at	Psmc1	1416772_at	Cpt2	1422535_at	Ccne2	1427623_at	Herc2	1450883_a_at	Cd36	1427464_s_at	Hspa5	1422305_at	Ifnb1	1424513_at	Atp6v0a2
1454987_a_at	H2-Ke6	1427094_at	Pole2	1438549_a_at	Srr	1421260_a_at	Srm	1436689_a_at	Aldh9a1	1417650_at	Lao1	1428667_at	Maoa	1435043_at	Plcb1	1448244_at	Lypla1	1451502_at	Pla2g10	1436119_at	Aldh1l2	1433613_at	Pank3	1416791_a_at	Nxf1	1460432_a_at	Eif3e	1417724_at	Thoc4	1416270_at	Polr2g	1450576_a_at	Sf3a2	1435859_x_at	Psmc2	1423257_at	Cyp4a14	1450017_at	Ccng1	1440582_at	Itch	1416246_a_at	Coro1a	1438858_x_at	H2-Aa	1445141_at		1420635_a_at	Tcirg1
1449038_at	Hsd11b1	1418369_at	Prim1	1449064_at	Tdh	1448609_at	Tst	1422979_at	Suv39h2	1434354_at	Maob	1445632_at	Ogdh	1452481_at	Plcb2	1433948_at	Pla2g1b	1420674_at	Pla2g2e	1458532_at	Mtr	1435004_at	Pank4	1423373_at	Rpp30	1416212_at	Magoh	1450560_a_at	Ppp2r5d	1424258_at	Polr2d	1442284_at	Sart1	1416282_at	Psmc3	1422100_at	Cyp7a1	1416488_at	Ccng2	1434443_at	Anapc1	1419527_at	Comp	1451721_a_at	H2-Ab1	1435647_at	Ikbkg	1450340_a_at	Clcnkb
1416761_at	Hsd11b2	1445474_at	Prim2	1423569_at	Gatm	1425035_s_at	Dnmt3l	1441557_at	Setd8	1451557_at	Tat	1418697_at	Inmt	1448661_at	Plcb3	1450128_at	Pla2g2a	1421325_at	Pla2g2f	1456653_a_at	Mthfd1l			1450986_at	Nop58	1450722_at	Nup50	1425844_a_at	Rngtt	1415754_at	Polr2f	1452439_s_at	Srsf2	1415740_at	Psmc5	1449309_at	Cyp8b1	1416401_at	Cd82	1431285_at	Mgrn1	1451310_a_at	Ctsl	1450531_at	H2-Bl	1425454_a_at	Il12a	1423993_at	Atp6v1f
1449392_at	Hsd17b1	1449648_s_at	Polr1c	1428780_at	Tha1	1418254_at	Apip	1451260_at	Aldh1b1			1419524_at	Tph1	1425338_at	Plcb4	1420584_at	Pla2g2c	1430700_a_at	Pla2g7	1429601_x_at	Mthfd2l			1422488_at	Nxt1	1448150_at	Nup62	1455520_at	Ppp2r5c	1451364_at	Polr3gl	1416150_a_at	Srsf3	1451725_a_at	Psmd4	1455976_x_at	Dbi	1448314_at	Cdk1	1423605_a_at	Mdm2	1448591_at	Ctss	1451934_at	H2-D1	1419530_at	Il12b	1417799_at	Atp6v1g2
1418352_at	Hsd17b2	1416126_at	Polr1b	1452311_at	Dmgdh	1424425_a_at	Mtap	1423003_at	Setd7			1425106_a_at	Wars	1416675_s_at	Plcd1	1418987_at	Pla2g2d	1435797_at	Ept1					1438844_x_at	Spata5	1418883_a_at	Pabpc1	1428462_at	Ppp2r5e	1428494_a_at	Polr2i	1423130_a_at	Srsf5	1417056_at	Psme1	1444844_at	Fabp3	1447617_at	Cdk2	1422055_at	Mid1	1454268_a_at	Cyba	1417025_at	H2-Eb1	1427705_a_at	Nfkb1	1450926_at	Atp6v1g1
1421671_at	Hsd17b3	1448287_at	Polr1d	1415673_at	Psph	1437327_x_at	Enoph1	1448382_at	Ehhadh			1418519_at	Aadat	1432927_at	Plcd4	1448558_a_at	Pla2g4a	1420910_at	Ppap2c					1416730_at	Rcl1	1419500_at	Pabpc2	1420936_s_at	Cpsf2	1451773_s_at	Polr3f	1441466_at		1417189_at	Psme2	1418438_at	Fabp2	1455287_at	Cdk6	1428725_at	Pias2	1436778_at	Cybb	1451593_at	H2-K1	1438157_s_at	Nfkbia	1419546_at	Atp6v1c1
1448865_at	Hsd17b7	1417775_at	Polr1a	1416049_at	Gldc	1426549_at	Mri1	1429389_at	Setmar			1419093_at	Tdo2	1442963_at	Plcg1	1417814_at	Pla2g5	1431278_s_at	Pla2g6					1448419_at	Pop4	1423324_at	Pnn	1455929_x_at	Ppp2r1a	1443494_at	Polr3b	1438836_at	Eftud2	1418078_at	Psme3	1417556_at	Fabp1	1421679_a_at	Cdkn1a	1421955_a_at	Nedd4	1416648_at	Dync1h1	1450587_at	H2-M10.1	1421266_s_at	Nfkbib	1430306_a_at	Atp6v1c2
1448453_at	Hsd3b1	1426242_at	Polr2a	1426243_at	Cth	1452703_at	Ahcyl2	1454776_at	Ehmt1			1436689_a_at	Aldh9a1	1456412_a_at	Inpp5k	1437113_s_at	Pld1	1452026_a_at	Pla2g12a					1423210_a_at	Nop10	1428073_a_at	Nup88	1420934_a_at	Srrm1	1453256_at	Polr3c	1444655_at	Snrpc	1418575_at	Shfm1	1450643_s_at	Acsl1	1450140_a_at	Cdkn2a	1448757_at	Pml	1416361_a_at	Dync1i1	1421358_at	H2-M3	1421926_at	Mapk11	1438993_a_at	Atp6v1d
1425127_at	Hsd3b2	1416341_at	Polr2c	1455985_x_at	Shmt2	1417650_at	Lao1	1430161_at	Dlst			1438348_x_at	Ccbl1	1438454_at	Pten	1457252_x_at	Pld2	1429514_at	Ppap2b					1426480_at	Sbds	1445883_at	Ranbp2	1424527_at	Ppp2r2d	1424227_at	Polr3h	1429010_at	Snrnp70	1443477_at	Psmd2	1416694_at	Gk2	1420032_at	Chek1	1449733_s_at	Siah1a	1415841_at	Dync1i2	1450529_at	H2-M9	1419536_a_at	Rela	1450552_at	Atp6v1e2
1420531_at	Hsd3b5	1417720_at	Polr2j	1434354_at	Maob	1438758_at	Adi1	1416670_at	Setdb1			1429279_at	Wars2	1452344_at	Synj2	1422620_s_at	Ppap2a	1419614_at	Pla2g12b					1429489_at	Rexo1	1451092_a_at	Rangap1	1416791_a_at	Nxf1	1437525_a_at	Polr3a	1437193_s_at	Snrpb	1448479_at	Psmd3	1422703_at	Gyk	1456071_a_at	Cycs	1423148_at	Skp1a	1436625_at	Fcgr1	1459872_x_at	H2-DMa	1449485_at	Ripk1	1448211_at	Atp6v0e2
1420447_at	Sult1e1	1440073_at	Rrm1	1448137_at	Aldh7a1	1434247_at	Ldhal6b	1452341_at	Echs1			1430570_at	Kynu	1435659_a_at	Tpi1	1449739_at	Ptdss1	1453405_at	Pla2g4d					1436684_a_at	Riok2	1422656_at	Rasl2-9-ps	1437984_x_at	Bat1a	1433552_a_at	Polr2b	1426613_a_at	Snrpb2	1416290_a_at	Psmc4	1431833_a_at	Hmgcs2	1450752_at	Cyct	1435350_at	Traf6	1455332_x_at	Fcgr2b	1419744_at	H2-DMb2	1441513_at	Tank	1419373_at	Atp6v1b1
1421500_at	Sts	1448226_at	Rrm2	1416662_at	Sardh	1426243_at	Cth	1452173_at	Hadha			1431722_a_at	Afmid	1422707_at	Pik3cg	1417433_at	Lypla2	1440207_at	Lpcat4					1455035_s_at	Nop56	1419685_at	Upf1	1424469_a_at	Cpsf4			1451294_s_at	Snrpe	1445729_at	Psmd13	1449942_a_at	Ilk	1449519_at	Gadd45a	1425858_at	Ube2m	1448620_at	Fcgr3	1419297_at	H2-Oa	1419607_at	Tnf	1422030_at	Atp6v0a4
1419622_at	Ugt2b5	1416258_at	Tk1	1455435_s_at	Chdh	1448196_at	Mat2b	1428827_at	Whsc1			1451260_at	Aldh1b1	1423657_at	Cdipt	1451502_at	Pla2g10	1416471_at	Cept1					1453019_at	Nvl	1438267_x_at	Rnps1	1422848_a_at	Pabpn1			1417724_at	Thoc4	1436770_x_at	Psma1	1450682_at	Fabp6	1416555_at	Ei24	1448670_at	Ube2e3	1438858_x_at	H2-Aa	1422201_at	H2-Ob	1451233_at	Traf2	1444176_at	Atp6v0d2
1449385_at	Hsd17b6	1449116_a_at	Dtymk	1424744_at	Sds	1426830_a_at	Ahcyl1	1460692_at	Ehmt2			1448382_at	Ehhadh	1423127_at	Impa1	1420674_at	Pla2g2e	1448489_at	Pafah2					1454957_at	Nob1	1426596_a_at	Smn1	1422855_at	Cpsf3			1417260_at	U2af2	1460339_at	Psma4	1416022_at	Fabp5	1460251_at	Fas	1436457_at	Ube2i	1451721_a_at	H2-Ab1	1425137_a_at	H2-Q10	1418587_at	Traf3
1417335_at	Sult2b1	1450484_a_at	Cmpk2	1424994_at	Glyctk	1424744_at	Sds	1451271_a_at	Acat1			1424600_at	Abp1	1416460_at	Miox	1421325_at	Pla2g2f	1420294_at						1428458_at	Pop1	1439372_at	Sumo3	1416568_a_at	Acin1			1448642_at	Pcbp1	1434356_a_at	Psma5	1431056_a_at	Lpl	1434413_at	Igf1	1431746_a_at	Uba3	1450531_at	H2-Bl	1422160_at	H2-T24	1435350_at	Traf6
1450010_at	Hsd17b12	1442192_at	Tyms	1437621_x_at	Phgdh	1423667_at	Mat2a	1448137_at	Aldh7a1			1452341_at	Echs1	1423229_at	Inpp5e	1426728_x_at	Ptdss2	1435870_at	Chpt1					1431388_at	Mphosph10	1419913_at	Strap	1440050_at	Hbs1l			1451884_a_at	Lsm2	1437144_x_at	Psma6	1430307_a_at	Me1	1458268_s_at	Igfbp3	1442767_s_at	Uba1	1451934_at	H2-D1	1427726_at	H2-D1	1424850_at	Map3k1
1424973_at	Cyp3a25	1424399_at	Uck1	1435838_at	Agxt2	1451557_at	Tat	1459030_at	Bbox1			1452173_at	Hadha	1449862_a_at	Pi4k2b	1435797_at	Ept1	1443797_at	Agps					1418305_s_at	Gar1	1417450_a_at	Tacc3	1422488_at	Nxt1			1436885_a_at	Cherp	1423568_at	Psma7	1455209_at	Pck1	1423605_a_at	Mdm2	1450285_at	Ube1y1	1417025_at	H2-Eb1	1455789_x_at	Hspa8	1455441_at	Map3k7
1445180_at	Srd5a3	1431652_at	Umps			1458532_at	Mtr	1420985_at	Ash1l			1418998_at	Kmo	1436215_at	Ipmk	1450504_a_at	Agpat3	1456231_at	Pla2g3					1426513_at	Rbm28	1417724_at	Thoc4	1456915_at	Papolb			1460633_at	Prpf19	1448262_at	Psmb2	1415729_at	Pdpk1	1458223_at	Mdm4	1448772_at	Ube2a	1451593_at	H2-K1	1419625_at	Hspa1l	1448342_at	Mapk10
1424934_at	Ugt2b1	1448562_at	Upp1			1418356_at	Mpst	1420726_x_at	Tmlhe			1417650_at	Lao1	1415977_at	Isyna1	1420910_at	Ppap2c	1440684_at	Lpcat2					1423142_a_at	Gtpbp4	1436457_at	Ube2i	1417479_at	Ppp2r3c			1460209_at	Usp39	1460198_a_at	Psmb3	1456424_s_at	Pltp	1449773_s_at	Gadd45b	1430177_at	Ube2b	1450587_at	H2-M10.1	1427126_at	Hspa1b	1448871_at	Mapk13
1450133_at	Ugt2a3	1459023_at	Nt5e			1417125_at	Ahcy	1437353_at	Setd1b			1432492_a_at	Haao	1431892_a_at	Plcd3	1423657_at	Cdipt	1436090_at	Enpp6					1427085_at	2810432D09Rik	1451005_at	Sumo1	1418119_at	Rbm8a			1448622_at	Lsm4	1423296_at	Psmd8	1449051_at	Ppara	1419149_at	Serpine1	1417033_at	Ube2g2	1421358_at	H2-M3	1417101_at	Hspa2	1451927_a_at	Mapk14
1438699_at	Srd5a1	1429971_at	Txnrd2					1457268_at	Dot1l			1434354_at	Maob	1452398_at	Plce1	1431278_s_at	Pla2g6	1429862_at	Pla2g4e					1459851_x_at	Riok1	1421895_at	Eif2s3x /// Gm2223	1450943_at	Magohb			1450849_at	Hnrnpu	1421751_a_at	Psmd14	1439797_at	Ppard	1438454_at	Pten	1438971_x_at	Ube2h	1450529_at	H2-M9	1416365_at	Hsp90ab1	1440856_at	Mapk8
1422960_at	Srd5a2	1424487_x_at	Txnrd1					1442764_at	Suv420h1			1451271_a_at	Acat1	1453069_at	Pik3cb	1421025_at	Agpat1	1437893_at	Plb1					1428389_s_at	Wdr43	1417210_at	Eif2s3y	1428280_at	Fip1l1			1448282_at	Plrg1	1423696_a_at	Psmd6	1420715_a_at	Pparg	1448226_at	Rrm2	1431224_at	Ube3a	1459872_x_at	H2-DMa	1437497_a_at	Hsp90aa1	1421878_at	Mapk9
1427961_s_at	Ugt2b34	1417252_at	Nt5c					1424059_at	Suv420h2			1448137_at	Aldh7a1	1438019_at	Ippk	1438078_at	Dgke							1432250_at	Utp14a	1435803_a_at	Eif4e2	1452971_at	Upf3a			1437984_x_at	Bat1a	1416979_at	Pomp	1454773_at	Rxra	1449733_s_at	Siah1a	1434708_at	Vhl	1419744_at	H2-DMb2	1416146_at	Hspa4	1426439_at	Ddx3y
1419136_at	Akr1c18	1416563_at	Ctps					1427116_at	Setd1a			1425778_at	Ido2	1433462_a_at	Pi4k2a	1452026_a_at	Pla2g12a							1442296_at	Wdr75	1427439_s_at	Prmt5	1448597_at	Cstf1			1419512_at	Prpf40b	1448492_a_at	Psmd12	1416990_at	Rxrb	1441941_x_at	Serpinb5	1426912_at	Rfwd2	1419297_at	H2-Oa	1425947_at	Ifng	1448032_at	Azi2
1456362_at	Cyp11b1	1448574_at	Nme6					1455668_at	Whsc1l1			1435314_at	Tph2	1436333_a_at	Synj1	1450987_a_at	2310004I24Rik							1449162_at	Pop7	1426674_at	Eif3b	1428807_at	Pabpc6			1456086_x_at	LOC631302 /// Pqbp1	1417769_at	Psmc6	1418782_at	Rxrg	1460302_at	Thbs1	1424850_at	Map3k1	1422201_at	H2-Ob	1425519_a_at	Cd74	1449283_a_at	Mapk12
1425771_at	Akr1d1	1457075_at	Ctps2					1433496_at	Glt25d1			1455991_at	Ccbl2	1448104_at	Aldh6a1	1429737_a_at	Crls1							1456814_at	Rrp7a	1420934_a_at	Srrm1	1446442_at	Rnmt			1450657_at	Ppie	1437080_s_at	Psmd11	1415965_at	Scd1	1457623_x_at	Trp53	1422795_at	Cul3	1425137_a_at	H2-Q10	1425005_at	Klrc1	1417244_a_at	Irf7
1455595_at	Ugt2b36	1432436_a_at	Ak3					1428555_at	Setd2			1448717_at	Gcdh	1439197_at	Pi4kb	1453785_at	Taz							1429747_at	1700009N14Rik	1416791_a_at	Nxf1	1423046_s_at	Ncbp2			1421033_a_at	Tcerg1	1429291_at	Psmd1	1415822_at	Scd2	1452325_at	Trp73	1448174_at	Cul1	1422160_at	H2-T24	1450304_at	Klrc2	1426111_x_at	Irf3
1426064_at	Cyp3a44	1416798_a_at	Nme4					1436120_at	Setdb2					1435068_at	Pip4k2b	1425029_a_at	Mboat2							1420585_a_at	Nxf2	1417718_at	Eif3g	1434842_s_at	Upf3b			1450035_a_at	Prpf40a	1427170_at	Psma8	1426219_at	Scp2	1452105_a_at	Tsc2	1418969_at	Skp2	1427726_at	H2-D1	1460245_at	Klrd1	1453865_a_at	Otud5
		1417581_at	Dhodh					1437930_at	Glt25d2					1459983_at	Impa2	1428821_at	Agpat2							1438818_at	Nmd3	1437984_x_at	Bat1a	1428673_at	Sympk			1416568_a_at	Acin1	1453150_at	Psmb11	1440311_at	Sorbs1	1449353_at	Zmat3	1460633_at	Prpf19	1416540_at	Hgs	1427808_at	Nfya	1460315_s_at	Tbk1
		1426100_a_at	Tk2					1448717_at	Gcdh					1422658_at	Plcz1	1429514_at	Ppap2b							1433692_at	Nat10	1416751_a_at	Ddx20	1417681_at	Nudt21			1448778_at	Srsf4	1445147_at	Psme4	1425965_at	Ubc	1453851_a_at	Gadd45g	1451558_at	Fbxw7	1450501_at	Itga2	1419266_at	Nfyb	1417813_at	Ikbke
		1459816_x_at	Pole3											1416387_at	Pip4k2c	1436640_x_at	Agpat4							1417675_a_at	Mdn1	1423373_at	Rpp30	1419275_at	Dazap1			1419357_at	Isy1	1424369_at	Psmf1	1418197_at	Ucp1	1426912_at	Rfwd2	1450746_at	Keap1	1423267_s_at	Itga5	1448963_at	Nfyc	1450679_at	Sike1
		1419058_at	Polr1e											1433941_at	Inpp5j	1420493_a_at	Pcyt2							1460562_at	Eftud1	1417585_at	Nup210	1429715_at	Ppp2r2a			1430987_s_at	Wbp11			1450444_a_at	Nr1h3	1416969_at	Gtse1	1426135_a_at	Park2	1422046_at	Itgam	1448883_at	Lgmn	1451746_a_at	Atg12
		1436291_a_at	Dpys											1433605_at	Inpp5a	1419614_at	Pla2g12b							1416210_at	Imp3	1448264_a_at	Eif3i	1426621_a_at	Ppp2r2b			1418119_at	Rbm8a			1435658_at	Slc27a1	1422747_at	Chek2	1448283_a_at	Uba2	1432678_at	Itgav	1417056_at	Psme1	1429399_at	Rnf125
		1422517_a_at	Znrd1											1426733_at	Itpk1	1430429_at	Pgs1							1448845_at	Rpp25	1416100_at	Eif3d	1428265_at	Ppp2r1b			1426786_s_at	Dhx38			1416316_at	Slc27a2	1449092_at	Ppm1d	1423931_s_at	Anapc4	1438119_at	Itgb1	1417189_at	Psme2	1426276_at	Ifih1
		1418737_at	Nudt2											1435003_at	Pi4ka	1456114_at	Cds1							1418443_at	Xpo1	1416568_a_at	Acin1	1456489_at	Pcf11			1435508_x_at	0610009D07Rik			1449112_at	Slc27a5	1448612_at	Sfn	1433430_s_at	Cdc23	1450678_at	Itgb2	1418078_at	Psme3	1439910_a_at	Tradd
		1417138_s_at	Polr2e											1425580_a_at	Pik3c3	1433515_s_at	Etnk1							1451259_at	Rexo2	1415859_at	Eif3c	1435520_at	Msi2			1423133_at	Cwc15			1424441_at	Slc27a4	1421397_a_at	Lrdd	1443148_at	Ube2k	1433054_at	Itgb2l	1425670_at	Rfxank	1447621_s_at	Tmem173
		1423073_at	Cmpk1											1427900_at	Pip5kl1	1447846_x_at	Mboat7							1454846_at	Utp15	1422488_at	Nxt1	1453315_at	Wibg			1437972_s_at	Sf3b5			1450956_at	Scd3	1418203_at	Pmaip1	1417723_at	Ube2j1	1455257_at	Itgb3	1420274_at	Tap1	1435183_at	Tbkbp1
		1423372_at	Pole4											1424037_at	Itpka	1453405_at	Pla2g4d							1451509_at	Taf9	1450778_a_at	Phax	1415920_at	Cstf2t			1429002_at	Snw1			1451828_a_at	Acsl4	1416271_at	Perp	1441713_at	Anapc7	1417533_a_at	Itgb5	1453913_a_at	Tap2	1429617_at	Cyld
		1450737_at	Polr3k											1441416_at	Inpp4b	1440207_at	Lpcat4							1424193_at	Pwp2	1444892_at	Nup160	1420585_a_at	Nxf2			1450943_at	Magohb			1449325_at	Fads2	1437503_a_at	Shisa5	1419451_at	Fzr1	1415880_a_at	Lamp1	1421812_at	Tapbp	1420768_a_at	Dhx58
		1424565_at	Polr3d											1426926_at	Plcg2	1416471_at	Cept1							1431373_at	Pop5	1418119_at	Rbm8a	1446162_at	Pabpc5			1417537_at	Zmat2			1417130_s_at	Angptl4	1422552_at	Rprm	1416580_a_at	Stub1	1416344_at	Lamp2	1419607_at	Tnf	1437693_at	D1Pas1
		1431761_at	Entpd4											1436616_at	Inpp4a	1450776_at	Agpat6							1427399_a_at	Nxf7	1452808_at	Snupn	1417665_a_at	Cpsf1			1452713_a_at	Snrnp40			1417610_at	Apoa5	1432144_a_at	Rchy1	1440061_at	Rbx1	1416386_a_at	M6pr	1421794_at	Klrc3	1419879_s_at	Trim25
		1449155_at	Polr3g											1435272_at	Itpkb	1452169_a_at	Dgkz							1438579_at	Utp14b	1452285_a_at	Eif3f	1423612_at	Clp1			1460697_s_at	Snrnp27			1448382_at	Ehhadh	1423468_at	Steap3	1416443_a_at	Sae1	1458297_s_at	Marco	1422476_at	Ifi30	1425300_at	Dak
		1416270_at	Polr2g											1457313_at	Ocrl	1431167_at	Dgkg							1424792_at	Rpp40	1448419_at	Pop4	1445418_at	Smg6			1448582_at	Ctnnbl1			1452771_s_at	Acsl3	1449303_at	Sesn3	1455611_at	Pias1	1419578_at	Mbl1	1418859_at	Rfxap	1451176_at	Mavs
		1426838_at	Pold3													1437000_at	Dgkq							1447660_at	Tbl3	1437071_at	Eif1ax	1434071_a_at	Pelo			1452675_at	Rbm22			1425615_a_at	Pck2	1455363_at	Bai1	1445885_at	Ube2d2	1418787_at	Mbl2	1452388_at	Hspa1a	1436562_at	Ddx58
		1424646_at	Uckl1													1418794_at	Cds2							1447679_s_at	Bms1	1450943_at	Magohb	1419645_at	Cstf2			1420849_at	Crnkl1			1435281_at	Cpt1c	1436680_s_at	Ddb2	1417172_at	Ube2l6	1415960_at	Mpo			1433661_at	Nlrx1
		1424258_at	Polr2d													1423704_at	Pla2g15							1451378_at	Utp6	1451044_at	Sip1	1427399_a_at	Nxf7			1452869_at	Prpf38b			1437352_at	Acox3	1438931_s_at	Sesn1	1440075_at	Pias4	1450430_at	Mrc1
		1452830_s_at	Cad													1420294_at								1454817_at	Utp18	1444256_at	Rae1	1416736_at	Casc3			1428908_at	Rbm25			1422175_at	Mmp1a	1423315_at	Bbc3	1433822_x_at	Anapc5	1421045_at	Mrc2
		1427885_at	Pold4													1435870_at	Chpt1							1424522_at	Heatr1	1452971_at	Upf3a	1436700_a_at				1429614_at	Prpf18			1422273_at	Mmp1b	1427744_at	Ccnb3	1415703_at	Huwe1	1451767_at	Ncf1
		1415754_at	Polr2f													1437040_at	Etnk2							1437630_at	Lsg1	1419461_at	Rpp14	1427241_at	Papolg			1422884_at	Snrpd3			1420673_a_at	Acox2	1425139_at	Sesn2	1444465_at	Ube4b	1448561_at	Ncf2
		1451364_at	Polr3gl													1456208_at	Gpat2							1451087_at	Wdr36	1417713_at	Eif2s2	1449701_at	Etf1			1448278_at	Xab2			1417590_at	Cyp27a1	1427197_at	Atr	1442660_at	Ppil2	1418465_at	Ncf4
		1428494_a_at	Polr2i													1440901_at	Dgkb							1425629_a_at	Nol6	1428807_at	Pabpc6	1426811_at	Ppp2r5b			1445719_at	Sf3a1			1419534_at	Olr1	1419944_at	LOC100504316 /// LOC100505168	1423113_a_at	Ube2d3	1429887_at	Nos1
		1451773_s_at	Polr3f													1441824_at	Mboat1							1426579_at	Gnl2	1449021_at	Rpp21	1455574_at	Smg7			1448536_at	Lsm3			1456737_x_at	Acaa1a	1433773_at	Rrm2b	1459212_at	Anapc11	1422994_at	Pikfyve
		1443494_at	Polr3b													1434690_at	Lclat1							1456599_at	Nxt2	1428458_at	Pop1	1440189_at	Ppp2r5a			1454914_at	2610101N10Rik			1451257_at	Acsl6			1429045_at	Smurf2	1450144_at	Pla2r1
		1427715_a_at	Nt5c1b													1424350_s_at	Lpgat1							1459225_at	Gnl3l	1423046_s_at	Ncbp2	1424723_s_at	Cstf3			1416438_at	Puf60			1424451_at	Acaa1b			1456860_at	Cdc26	1422119_at	Rab5b
		1444288_at	Pnpt1													1443781_at	Dgkd							1441788_s_at	Dkc1	1434842_s_at	Upf3b	1434546_at	Smg5			1416720_at	Srsf6			1424352_at	Cyp4a12a			1417039_a_at	Cul7	1424684_at	Rab5c
		1429550_at	Entpd8													1454799_at	Agpat9							1456035_at	Nxf3	1434324_x_at	Eif3h	1451296_x_at	Pabpc4			1448357_at	Snrpg			1439000_at	Acsbg2			1443188_at	Ube2w	1415734_at	Rab7
		1427357_at	Cda													1436124_at	Pcyt1b							1433746_at	Wdr3	1419680_a_at	Elac2	1442925_at	Smg1			1423046_s_at	Ncbp2			1428082_at	Acsl5			1442162_at	Wwp2	1451086_s_at	Rac1
		1453256_at	Polr3c													1456231_at	Pla2g3									1428272_at	Eif1b	1455091_at	Ppp2r3a			1437262_x_at	Bcas2			1440134_at	Cyp4a31			1423624_at	Fancl	1425435_at	Msr1
		1422727_at	Nme5													1440684_at	Lpcat2									1426447_at	Nup35	1456599_at	Nxt2			1424170_at	Phf5a							1455094_s_at	Ube2g1	1415766_at	Sec22b
		1451688_s_at	Cant1													1439986_at	Dgki									1435764_a_at	Gemin7	1438455_at	Pabpc4l			1424104_at	Syf2							1444599_at	Herc4	1429626_at	Sftpa1
		1451548_at	Upp2													1460585_x_at	Pisd									1432187_at	Nup43	1456035_at	Nxf3			1428892_at	Ppil1							1448269_a_at	Klhl13	1420378_at	Sftpd
		1425933_a_at	Nt5c2													1429862_at	Pla2g4e									1427085_at	2810432D09Rik	1453356_at	Cpsf7			1426026_at	Prpf6							1415768_a_at	Ube2r2	1416050_a_at	Scarb1
		1424227_at	Polr3h													1438196_at	Gpd1l									1425562_s_at	Trnt1	1438054_x_at	Ppp2r2c			1417353_x_at	Snrpa1							1428263_a_at	Tceb2	1420274_at	Tap1
		1417137_at	Uck2													1457213_a_at	Dgkh									1430343_at	Nup205	1445777_at	Upf2			1453005_at	Prpf31							1429568_x_at	Ube2f	1453913_a_at	Tap2
		1427945_at	Dpyd													1437893_at	Plb1									1420469_at	4933411G06Rik	1439913_at	Pabpc1l			1423925_at	Dhx16							1452593_a_at	Tceb1	1460302_at	Thbs1
		1460244_at	Upb1																							1424291_at	Nup93	1439991_a_at	Pabpn1l			1428672_at	Snrpf							1432144_a_at	Rchy1	1422571_at	Thbs2
		1453767_a_at	Nt5m																							1429878_a_at	Nupl1	1428232_at	Cpsf6			1429724_at	Prpf4							1452954_at	Ube2c	1416623_at	Thbs3
		1431306_at	Nt5c3																							1419967_at	Seh1l	1433663_s_at	Ncbp1			1424314_at	Prpf3							1434554_at	Trim37	1449388_at	Thbs4
		1419269_at	Dut																							1428560_at	Xpo5					1428092_at	Cdc5l							1429376_s_at	Anapc10	1424513_at	Atp6v0a2
		1438874_at	Nme7																							1433813_at	Tmem48					1457366_at	Cdc40							1452586_at	Anapc13	1418163_at	Tlr4
		1434049_at	Entpd3																							1428949_at	Xpot					1427022_at	Ddx42							1429206_at	Rhobtb1	1421352_at	Tlr6
		1437525_a_at	Polr3a																							1423970_at	Thoc3					1419803_s_at	Ccdc12							1427476_a_at	Trim32	1418884_x_at	Tuba1a
		1433552_a_at	Polr2b																							1449162_at	Pop7					1423970_at	Thoc3							1425554_a_at	Cdc16	1417373_a_at	Tuba4a
		1423869_s_at	Txnrd3																							1429747_at	1700009N14Rik					1439952_at	Ddx23							1434508_at	Ube2q1	1427347_s_at	Tubb2a
		1454659_at	Dctd																							1426380_at	Eif4b					1423811_at	Sf3a3							1444327_at	Ubr5	1415978_at	Tubb3
		1433773_at	Rrm2b																							1425466_at	Senp2					1452999_at	Smndc1							1451231_a_at	Cul2	1423221_at	Tubb4
																										1430909_at	Nup210l					1448703_at	Naa38							1427194_a_at	Ercc8	1416256_a_at	Tubb5
																										1453315_at	Wibg					1426698_a_at	Hnrnpm							1417454_at	Cul4b	1456245_x_at	Vamp3
																										1420585_a_at	Nxf2					1445745_at	Rbm17							1431202_at	Herc3	1419132_at	Tlr2
																										1446162_at	Pabpc5					1431054_at	Lsm6							1428070_at	Syvn1	1420635_a_at	Tcirg1
																										1438818_at	Nmd3					1418562_at	Sf3b1							1426970_a_at	Cdh29 /// Uba7	1417009_at	C1ra
																										1448845_at	Rpp25					1454725_at	Tra2a							1452722_a_at	Cul5	1418436_at	Stx7
																										1426751_s_at	Nup107					1430075_at	Sf3b3							1428395_at	Smurf1	1416190_a_at	Sec61a1
																										1418443_at	Xpo1					1452680_at	Snrpd2							1444774_at		1446771_at	Tuba8
																										1452672_at	Thoc5					1436784_x_at	Sf3b4							1452779_at	Ube2ql1	1449622_s_at	Atp6ap1
																										1427886_at	Pom121					1417727_at	Srsf9							1430962_at	Ube2s	1420699_at	Clec7a
																										1434524_at	Eif2b3					1422509_at	U2af1							1422666_at	Cblc	1449944_a_at	Sec61a2
																										1426948_at	Tpr					1428100_at	Srsf1							1441305_at	Nedd4l	1423993_at	Atp6v1f
																										1416241_at	Sec13					1422453_at	Prpf8							1415707_at	Anapc2	1427862_at	Sec61b
																										1453061_at	Elac1					1436700_a_at								1451971_at	Cul4a	1417799_at	Atp6v1g2
																										1450400_at	Tgs1					1425488_at	Slu7							1456992_at	Ube3c	1450926_at	Atp6v1g1
																										1431373_at	Pop5					1452388_at	Hspa1a							1447294_at	Fbxw11	1419546_at	Atp6v1c1
																										1427399_a_at	Nxf7					1455103_at	Ddx46							1435213_at	Nhlrc1	1416431_at	Tubb6
																										1418727_at	Nup155					1426629_at	Dhx8							1427121_at	Fbxo4	1430306_a_at	Atp6v1c2
																										1415782_at	Sumo2					1436871_at	Srsf7							1427097_at	Wwp1	1449971_a_at	Cd209f
																										1416736_at	Casc3					1431044_at	Thoc1							1436680_s_at	Ddb2	1456895_at	Cd209b
																										1436700_a_at						1452774_at	Hnrnpa3							1439377_x_at	Cdc20	1449918_at	Cd209g
																										1436975_at	Pom121l2					1444087_at	Prpf38a							1433664_at	Ube2q2	1425011_x_at	Stx18
																										1424792_at	Rpp40					1438637_x_at	Sf3b2							1452149_at	Ube3b	1429179_at	Colec11
																										1427036_a_at	Eif4g1					1460552_at	Snrnp200							1426138_a_at	Ube2j2	1452679_at	Tubb2b
																										1460730_at	Eif2b1					1438736_at	Thoc2							1439867_at	Ubox5	1438993_a_at	Atp6v1d
																										1436310_at	Gemin5					1433663_s_at	Ncbp1							1425278_at	Ube4a	1450552_at	Atp6v1e2
																										1437428_x_at	Eif2b2													1437304_at	Cblb	1448211_at	Atp6v0e2
																										1456256_at	Eif5													1424062_at	Ube2d1	1448936_at	Stx12
																										1441733_s_at	Nup153													1434879_at	Cdc34	1419534_at	Olr1
																										1441955_s_at	Paip1													1433849_at	Cdc27	1415826_at	Atp6v1h
																										1451377_a_at	Aaas													1433765_at	Ube2o	1429250_at	Dync2h1
																										1445908_at	Eif2b5													1447025_at		1419373_at	Atp6v1b1
																										1431044_at	Thoc1													1421646_a_at	Pias3	1416769_s_at	Atp6v0b
																										1434605_at	Eif5b													1427004_at	Fbxo2	1422030_at	Atp6v0a4
																										1442314_at	Nup188													1443927_at	Uba6	1419693_at	Colec12
																										1456503_at	Nup214													1436732_s_at	Fbxw8	1421562_at	Cd209c
																										1451296_x_at	Pabpc4													1440437_at	Herc1	1426183_a_at	Cd209d
																										1440571_at	Eif4g3													1433442_at	Klhl9	1420582_at	Cd209e
																										1424889_at	Nupl2													1451517_at	Rhobtb2	1426172_a_at	Cd209a
																										1451875_at	4930444G20Rik /// AF366264													1459296_at	Ube2z	1438045_at	Eea1
																										1441235_at	Nup133													1437609_at	Ube2u	1425580_a_at	Pik3c3
																										1456599_at	Nxt2															1435830_a_at	5430435G22Rik
																										1444239_at	Gemin8															1423642_at	Tubb2c
																										1438455_at	Pabpc4l															1433926_at	Dync1li2
																										1456035_at	Nxf3															1424947_at	Dync1li1
																										1447253_x_at	Nup54															1444176_at	Atp6v0d2
																										1434220_at	Nup98															1425225_at	Fcgr4
																										1445777_at	Upf2															1416426_at	Rab5a
																										1438736_at	Thoc2															1457696_at	Rilp
																										1439913_at	Pabpc1l															1444214_at	Tubb1
																										1434827_at	Thoc6
																										1433663_s_at	Ncbp1
																										1437520_a_at	Nup85
[truncated: 8 more columns]

## Sheet: 24down
00020: Citrate cycle (TCA cycle)(30)		00250: Alanine, aspartate and glutamate metabolism(31)		00410: beta-Alanine metabolism(21)		00500: Starch and sucrose metabolism(32)		00510: N-Glycan biosynthesis(49)		00512: Mucin type O-Glycan biosynthesis(25)		00514: Other types of O-glycan biosynthesis(32)		00520: Amino sugar and nucleotide sugar metabolism(48)		00600: Sphingolipid metabolism(39)		00601: Glycosphingolipid biosynthesis - lacto and neolacto series(24)		00603: Glycosphingolipid biosynthesis - globo series(15)		00604: Glycosphingolipid biosynthesis - ganglio series(15)		00630: Glyoxylate and dicarboxylate metabolism(18)		00650: Butanoate metabolism(27)		00900: Terpenoid backbone biosynthesis(13)		00983: Drug metabolism - other enzymes(53)		03010: Ribosome(53)		03060: Protein export(18)		04010: MAPK signaling pathway(256)		04012: ErbB signaling pathway(86)		04020: Calcium signaling pathway(166)		04060: Cytokine-cytokine receptor interaction(218)		04062: Chemokine signaling pathway(168)		04110: Cell cycle(119)		04114: Oocyte meiosis(105)
ID	Gene Symbol	ID	Gene Symbol	ID	Gene Symbol	ID	Gene Symbol	ID	Gene Symbol	ID	Gene Symbol	ID	Gene Symbol	ID	Gene Symbol	ID	Gene Symbol	ID	Gene Symbol	ID	Gene Symbol	ID	Gene Symbol	ID	Gene Symbol	ID	Gene Symbol	ID	Gene Symbol	ID	Gene Symbol	ID	Gene Symbol	ID	Gene Symbol	ID	Gene Symbol	ID	Gene Symbol	ID	Gene Symbol	ID	Gene Symbol	ID	Gene Symbol	ID	Gene Symbol	ID	Gene Symbol
1423644_at	Aco1	1418472_at	Aspa	1415984_at	Acadm	1417765_a_at	Amy1	1454860_x_at	Dad1	1423237_at	Galnt1	1455843_at	Fut4	1451537_at	Chi3l1	1449006_at	Gla	1450359_at	Fut1	1449006_at	Gla	1423621_a_at	Slc33a1	1423644_at	Aco1	1460216_at	Acads	1429356_s_at	Ggps1	1419441_at	Rplp0	1419441_at	Rplp0	1427464_s_at	Hspa5	1425711_a_at	Akt1	1444134_at	Abl1	1450299_at	Chrna7	1448460_at	Acvr1	1418128_at	Adcy6	1444134_at	Abl1	1418128_at	Adcy6
1436934_s_at	Aco2	1418372_at	Adsl	1416468_at	Aldh1a1	1417880_at	G6pc	1420179_at	Ddost	1417588_at	Galnt3	1420756_at	Fut7	1428043_a_at	Cmah	1460346_at	Arsa	1450246_at	Fut2	1450359_at	Fut1	1416205_at	Glb1	1436934_s_at	Aco2	1416561_at	Gad1	1427229_at	Hmgcr	1417452_a_at	Fau	1417452_a_at	Fau	1421012_at	Srprb	1424480_s_at	Akt2	1455682_at	Abl2	1420970_at	Adcy7	1433725_at	Acvr1b	1420970_at	Adcy7	1421205_at	Atm	1420970_at	Adcy7
1422577_at	Cs	1449383_at	Adssl1	1448143_at	Aldh2	1436849_x_at	Gaa	1448549_a_at	Dpagt1	1423638_at	Galnt4	1450771_at	Fut9	1426662_at	Cmas	1416735_at	Asah1	1455843_at	Fut4	1450246_at	Fut2	1418655_at	B4galnt1	1422577_at	Cs	1421978_at	Gad2	1431833_a_at	Hmgcs2	1431766_x_at	Rps2	1431766_x_at	Rps2	1448753_at	Srp9	1448135_at	Atf4	1425711_a_at	Akt1	1418754_at	Adcy8	1451004_at	Acvr2a	1418754_at	Adcy8	1424046_at	Bub1	1418754_at	Adcy8
1433263_at	Dld	1460726_at	Adss	1415776_at	Aldh3a2	1434814_x_at	Gpi1	1449438_at	Adnp /// Dpm1	1449538_a_at	Gcnt1	1418014_a_at	B4galt1	1450187_a_at	Galt	1416205_at	Glb1	1420756_at	Fut7	1450771_at	Fut9	1449024_a_at	Hexa	1420420_at	Hao1	1460184_at	Hadh	1418052_at	Mvk	1431177_a_at	Rpl10a	1431177_a_at	Rpl10a	1416190_a_at	Sec61a1	1422169_a_at	Bdnf	1424480_s_at	Akt2	1419811_at	Adcy9	1419140_at	Acvr2b	1419811_at	Adcy9	1447362_at	Bub1b	1419811_at	Adcy9
1424828_a_at	Fh1	1418833_at	Agxt	1449396_at	Aoc3	1416737_at	Gys1	1415675_at	Dpm2	1418946_at	St3gal1	1420643_at	Lfng	1428715_at	Gfpt1	1423346_at	Degs1	1450771_at	Fut9	1449024_a_at	Hexa	1460180_at	Hexb	1433984_a_at	Mdh2	1424639_a_at	Hmgcl	1454090_at	Pdss1	1436699_x_at	Rpl18	1436699_x_at	Rpl18	1418223_at	Sec11a	1430408_at	Cacna1a	1426602_at	Araf	1460710_at	Adora2a	1450573_at	Amh	1425711_a_at	Akt1	1416815_s_at	Bub3	1455647_at	Ar
1422433_s_at	Idh1	1416239_at	Ass1	1416561_at	Gad1	1420901_a_at	Hk1	1437812_x_at	Ganab	1421892_at	St3gal2	1416992_at	Mfng	1418753_at	Gfpt2	1452907_at	Galc	1453674_at	Gcnt2	1460180_at	Hexb	1418946_at	St3gal1	1434319_at	Mdh1	1431833_a_at	Hmgcs2	1450654_a_at	Dhdds	1448109_a_at	Rpl26	1448109_a_at	Rpl26	1449944_a_at	Sec61a2	1425812_a_at	Cacna1b	1421134_at	Areg	1450214_at	Adora2b	1422003_at	Cxcr5	1424480_s_at	Akt2	1449177_at	Ccna1	1446925_at	Btrc
1416789_at	Idh3g	1437612_at		1421978_at	Gad2	1422612_at	Hk2	1418014_a_at	B4galt1	1421517_at	St6galnac1	1460704_at	Rfng	1417177_at	Galk1	1450099_a_at	Gba	1451843_a_at	Ggta1	1449043_at	Naga	1421892_at	St3gal2	1448486_at	Mut	1418560_at	Pdha1	1427893_a_at	Pmvk	1453096_x_at	Rpl27	1453096_x_at	Rpl27	1427862_at	Sec61b	1421297_a_at	Cacna1c	1416582_a_at	Bad	1422183_a_at	Adra1b	1423635_at	Bmp2	1443768_at	Rhoa	1417910_at	Ccna2	1424046_at	Bub1
1433984_a_at	Mdh2	1416561_at	Gad1	1421260_a_at	Srm	1459546_s_at	Enpp1	1441417_at	Stt3a	1421967_at	B4galt5	1420928_at	St6gal1	1434814_x_at	Gpi1	1448481_at	Neu1	1418014_a_at	B4galt1	1418946_at	St3gal1	1420903_at	St6galnac3	1418654_at	Hao2	1450962_at	Pdha2	1459473_at		1416218_x_at	Rpl37a	1416218_x_at	Rpl37a	1460698_a_at	Sec11c	1428051_a_at	Cacna1d	1421161_at	Btc	1421659_at	Adra1a	1435479_at	Bmp7	1422003_at	Cxcr5	1450920_at	Ccnb2	1437125_at	Camk2a
1434319_at	Mdh1	1421978_at	Gad2	1449964_a_at	Mlycd	1448602_at	Pygm	1417111_at	Man1a	1416655_at	C1galt1c1	1421915_a_at	St3gal3	1449024_a_at	Hexa	1422620_s_at	Ppap2a	1421915_a_at	St3gal3	1421892_at	St3gal2	1418075_at	St6galnac4	1450969_at	Pccb	1425559_a_at	Acsm3	1438150_at	Fdps	1438926_at		1438926_at		1450891_at	Srp19	1421692_at	Cacna1e	1437125_at	Camk2a	1423420_at	Adrb1	1425492_at	Bmpr1a	1450357_a_at	Ccr6	1448698_at	Ccnd1	1448676_at	Camk2b
1445632_at	Ogdh	1428715_at	Gfpt1	1436689_a_at	Aldh9a1	1416308_at	Ugdh	1420977_at	Man1a2	1417641_at	Galntl5	1419622_at	Ugt2b5	1460180_at	Hexb	1415892_at	Sgpl1	1425668_a_at	St3gal4	1419695_at	St8sia1	1419695_at	St8sia1	1428788_at	Pgp	1418272_at	Oxct2a	1451271_a_at	Acat1	1416546_a_at	Rpl6	1416546_a_at	Rpl6	1451217_a_at	Immp1l	1423365_at	Cacna1g	1448676_at	Camk2b	1437302_at	Adrb2	1443720_s_at	Bmpr1b	1435807_at	Cdc42	1430127_a_at	Ccnd2	1423942_a_at	Camk2g
1455209_at	Pck1	1418753_at	Gfpt2	1436291_a_at	Dpys	1419622_at	Ugt2b5	1448647_at	Man2a1	1453630_at	Galnt14	1415901_at	Plod3	1420901_a_at	Hk1	1447874_x_at	Smpd1	1419695_at	St8sia1	1418736_at	B3galnt1	1449198_a_at	St3gal5	1425201_a_at	Hyi	1436750_a_at	Oxct1	1417303_at	Mvd	1415979_x_at	Rpl7	1415979_x_at	Rpl7	1450907_at	Spcs2	1420442_at	Cacna1s	1423942_a_at	Camk2g	1455918_at	Adrb3	1434310_at	Bmpr2	1417091_at	Chuk	1415907_at	Ccnd3	1450920_at	Ccnb2
AFFX-PyruCarbMur/L09192_5_at	Pcx	1426236_a_at	Glul	1451260_at	Aldh1b1	1449430_a_at	Treh	1423609_a_at	Mgat1	1430963_at	Gcnt3	1418080_at	B4galt2 /// Ccdc24	1422612_at	Hk2	1416999_at	Smpd2	1450530_at	B3galt1	1423009_at	Sec1	1419420_at	St6galnac5	1431722_a_at	Afmid	1448214_at	Pdhb	1441536_at	Hmgcs1	1416420_a_at	Rpl9	1416420_a_at	Rpl9	1428876_at	Srp72	1441608_at	Cacna2d1	1450457_at	Cbl	1436739_at	Agtr1a	1450357_a_at	Ccr6	1421734_at	Cxcr2	1441910_x_at	Ccne1	1441910_x_at	Ccne1
1418560_at	Pdha1	1434657_at	Gls	1448382_at	Ehhadh	1453283_at	Pgm1	1428801_at	Mgat3	1429235_at	Galntl2	1449435_at	B4galt3	1450107_a_at	Renbp	1451596_a_at	Sphk1	1437433_at	B3galt2	1428397_at	B3galt5	1423115_at	St6galnac6	1449400_at	Csl	1453011_at	Bdh2	1451122_at	Idi1	1436586_x_at	Rps14	1436586_x_at	Rps14	1423670_a_at	Srpr	1419225_at	Cacna2d3	1421679_a_at	Cdkn1a	1446527_at	Agtr1b	1421734_at	Cxcr2	1449925_at	Cxcr3	1422535_at	Ccne2	1422535_at	Ccne2
1450962_at	Pdha2	1416209_at	Glud1	1452341_at	Echs1	1452011_a_at	Uxs1	1418896_a_at	Rpn2	1450745_at	C1galt1	1426618_a_at	Pomgnt1	1448495_at	Tsta3	1435937_at	Sptlc2	1418080_at	B4galt2 /// Ccdc24	1426148_at	Gbgt1	1419138_at	B3galt4	1438477_a_at	Mcee	1452257_at	Bdh1			1455835_at	Rps16	1455835_at	Rps16	1427500_at	Spcs1	1426108_s_at	Cacnb1	1434045_at	Cdkn1b	1434897_a_at	Slc25a4	1449925_at	Cxcr3	1448710_at	Cxcr4	1417131_at	Cdc25a	1456077_x_at	Cdc25c
1452206_at	Sucla2	1450970_at	Got1	1452173_at	Hadha	1456478_at	Pgm2l1	1420928_at	St6gal1	1426756_at	Galnt2	1424934_at	Ugt2b1	1416308_at	Ugdh	1439863_at	Ugcg	1449078_at	St3gal6	1455338_at	A4galt	1421735_a_at	St8sia5	1417772_at	Grhpr	1448382_at	Ehhadh			1438502_x_at	Rps17	1438502_x_at	Rps17	1456845_at	Oxa1l	1456401_at	Cacnb2	1425855_a_at	Crk	1436874_x_at	Slc25a5	1448710_at	Cxcr4	1419610_at	Ccr1	1421963_a_at	Cdc25b	1448314_at	Cdk1
1435841_s_at	Suclg2	1417716_at	Got2	1427945_at	Dpyd	1424934_at	Ugt2b1	1418080_at	B4galt2 /// Ccdc24	1426908_at	Galnt7	1450133_at	Ugt2a3	1448163_at	Gnpda1	1419064_a_at	Ugt8a	1425934_a_at	B4galt4					1451271_a_at	Acat1	1451116_at	Aacs			1455572_x_at	Rps18	1455572_x_at	Rps18	1432635_a_at	Sec62	1448656_at	Cacnb3	1425604_at	Crkl	1419312_at	Atp2a1	1419610_at	Ccr1	1442758_at	Ccr9	1456077_x_at	Cdc25c	1447617_at	Cdk2
1415891_at	Suclg1	1451095_at	Asns	1460244_at	Upb1	1450133_at	Ugt2a3	1456367_at	Fut8	1416760_at	Galntl1	1437845_x_at	Pofut2	1424167_a_at	Pmm1	1431936_a_at	Neu2	1423009_at	Sec1					1447577_x_at	Pcca	1417085_at	Akr1c6			1449243_a_at	Rps19	1449243_a_at	Rps19	1451175_at	Spcs3	1452089_at	Cacnb4	1418093_a_at	Egf	1443551_at	Atp2a2	1442758_at	Ccr9	1422349_at	Ccr1l1	1448314_at	Cdk1	1417960_at	Cpeb1
1435986_x_at	Sdhc	1418763_at	Nit2	1448137_at	Aldh7a1	1451149_at	Pgm2	1421059_a_at	Alg2	1440493_at	Galnt10	1426620_at	Chst10	1455583_at	Gne	1420910_at	Ppap2c	1449435_at	B4galt3					1424994_at	Glyctk	1452341_at	Echs1			1456628_x_at	Rps24	1456628_x_at	Rps24	1419495_at	Immp2l	1422813_at	Cacng1	1457563_at	Egfr	1433888_at	Atp2b2	1422349_at	Ccr1l1	1422957_at	Ccr3	1416575_at	Cdc45	1450951_at	Smc3
1437489_x_at	Sdhd	1452830_s_at	Cad	1451512_s_at	Hibch	1420654_a_at	Gbe1	1428072_a_at	Dolpp1	1446657_at	Galnt6	1424284_at	Pomt1	1431938_a_at	Pmm2	1419339_at	Neu3	1422211_a_at	B3gnt3							1452173_at	Hadha			1437413_x_at	Rps29	1437413_x_at	Rps29			1420596_at	Cacng2	1434976_x_at	Eif4ebp1	1450586_at	Bdkrb1	1422957_at	Ccr3	1460067_at	Ccr2	1426002_a_at	Cdc7	1434413_at	Igf1
1426689_s_at	Sdha	1453499_at	Ddo	1433855_at	Abat	1431063_at	Ganc	1449435_at	B4galt3	1437760_at	Galnt12	1427961_s_at	Ugt2b34	1423156_at	Gnpnat1	1454078_a_at	Gal3st1	1421559_at	Abo							1451271_a_at	Acat1			1422475_a_at	Gm10119 /// Gm9000 /// Rps3a	1422475_a_at	Gm10119 /// Gm9000 /// Rps3a			1430192_at	Casp3	1421897_at	Elk1	1442187_at	Bdkrb2	1460067_at	Ccr2	1421655_a_at	Ccr4	1447617_at	Cdk2	1452982_at	Igf1r
1418005_at	Sdhb	1448539_a_at	Acy3	1455561_at	Cndp1	1431032_at	Agl	1422489_at	Mogs	1424748_at	Galnt11	1451738_at	Ogt	1419509_a_at	Nagk	1458849_at	Asah2	1428397_at	B3galt5							1418668_at	Acsm1			1416276_a_at	Rps4x	1416276_a_at	Rps4x			1417268_at	Cd14	1424919_at	Erbb2	1449454_at	Bst1	1421655_a_at	Ccr4	1422259_a_at	Ccr5	1455287_at	Cdk6	1422447_at	Ins1
1432016_a_at	Idh3a	1453216_at	Gpt			1427961_s_at	Ugt2b34	1424160_at	Alg5	1454780_at	Galntl4	1456323_at	Pofut1	1453283_at	Pgm1	1460329_at	B4galt6	1420993_at	B3gnt5							1441536_at	Hmgcs1			1416054_at	Rps5	1416054_at	Rps5			1421963_a_at	Cdc25b	1434606_at	Erbb3	1430408_at	Cacna1a	1422259_a_at	Ccr5	1423466_at	Ccr7	1439511_at	Cdk7	1422446_x_at	Ins2
1448214_at	Pdhb	1417650_at	Lao1			1425303_at	Gck	1419114_at	Alg14	1442272_at	Galntl6	1451396_at	Pomt2	1417941_at	Nanp	1417431_a_at	Sphk2	1452346_at	B3gnt1							1453065_at	Aldh5a1			1453466_at	Rps6	1453466_at	Rps6			1435807_at	Cdc42	1427783_at	Erbb4	1425812_a_at	Cacna1b	1423466_at	Ccr7	1422291_at	Ccr8	1421679_a_at	Cdkn1a	1417279_at	Itpr1
1449400_at	Csl	1455007_s_at	Gpt2			1430332_a_at	Gusb	1422096_at	4933434I20Rik	1439899_at	Galnt13	1434876_at	Gxylt1	1452011_a_at	Uxs1	1438665_at	Smpd3	1451815_at	B3gnt4							1424858_at	L2hgdh			1435593_x_at	Rps7	1435593_x_at	Rps7			1417091_at	Chuk	1419431_at	Ereg	1421297_a_at	Cacna1c	1422291_at	Ccr8	1421420_at	Ccr10	1434045_at	Cdkn1b	1427287_s_at	Itpr2
1425615_a_at	Pck2	1448350_at	Asl			1433504_at	Pygb	1421178_at	Mgat4c	1456680_at	B3gnt6	1426535_at	Poglut1	1457230_at	Gnpda2	1453179_at	Acer3									1427223_a_at	Acsm2			1455485_x_at	Rpl13a	1455485_x_at	Rpl13a			1425855_a_at	Crk	1423059_at	Ptk2	1428051_a_at	Cacna1d	1421420_at	Ccr10	1439388_s_at	Bcar1	1417649_at	Cdkn1c	1417297_at	Itpr3
1430161_at	Dlst	1452375_at	Aldh4a1			1417741_at	Pygl	1418681_at	Alg13			1455595_at	Ugt2b36	1435978_at	Gmppa	1429514_at	Ppap2b									1433855_at	Abat			1452701_x_at	Uba52	1452701_x_at	Uba52			1425604_at	Crkl	1417693_a_at	Gab1	1421692_at	Cacna1e	1417625_s_at	Cxcr7	1425855_a_at	Crk	1450140_a_at	Cdkn2a	1434443_at	Anapc1
1439459_x_at	Acly	1453065_at	Aldh5a1			1439260_a_at	Enpp3	1426342_at	Stt3b			1444302_at	Gxylt2	1455798_at	Galk2	1424549_at	Degs2									1437662_at	Acsm5			1419799_at		1419799_at				1419026_at	Daxx	1449111_a_at	Grb2	1423365_at	Cacna1g	1419429_at	Cntfr	1425604_at	Crkl	1449152_at	Cdkn2b	1450775_at	Mos
1441271_at	Idh3b	1435245_at	Gls2			1435490_at	Hk3	1452729_at	Dpm3			1433496_at	Glt25d1	1453844_at	Chit1	1428559_at	Kdsr													1417762_a_at	Rpl8	1417762_a_at	Rpl8			1449519_at	Gadd45a	1418349_at	Hbegf	1420442_at	Cacna1s	1425155_x_at	Csf1	1423518_at	Csk	1416868_at	Cdkn2c	1455772_at	Pgr
1426265_x_at	Dlat	1455540_at	Cps1			1426460_a_at	Ugp2	1421662_a_at	Tusc3			1434819_at	St6gal2	1424048_a_at	Cyb5r1	1429029_at	Sgms2													1455600_at	Rps3	1455600_at	Rps3			1443897_at	Ddit3	1422407_s_at	Hras1	1437125_at	Camk2a	1419873_s_at	Csf1r	1450020_at	Cx3cr1	1416253_at	Cdkn2d /// Gm4694	1447720_x_at	Prkaca
1450048_a_at	Idh2	1452831_s_at	Ppat			1455595_at	Ugt2b36	1418844_at	Alg9			1434531_at	Mgat5b	1451149_at	Pgm2	1437024_at	Smpd4													1424000_a_at	Rps11	1424000_a_at	Rps11			1450698_at	Dusp2	1417409_at	Jun	1448676_at	Camk2b	1427429_at	Csf2	1423059_at	Ptk2	1459804_at	Crebbp	1420610_at	Prkacb
		1435838_at	Agxt2			1424815_at	Gys2	1424720_at	Mgat4b			1437930_at	Glt25d2	1424265_at	Npl	1420821_at	Sgpp1													1451101_a_at	Rps28	1451101_a_at	Rps28			1418093_a_at	Egf	1451979_at	Kras	1423942_a_at	Camk2g	1420704_at	Csf2ra /// LOC100045292	1442804_at	Fgr	1450951_at	Smc3	1448191_at	Plk1
		1433855_at	Abat			1456777_at	Mgam	1459778_at				1457043_at	B3galtl	1424140_at	Gale	1450825_at	Acer1													1460699_at	Rps27	1460699_at	Rps27			1457563_at	Egfr	1424942_a_at	Myc	1421941_at	Camk4	1455660_at	Csf2rb	1427510_at	Gnai1	1449519_at	Gadd45a	1460165_at	Ppp1ca
								1428644_at	Mgat5					1429519_at	Fpgt	1426576_at	Sgms1													1449398_at	Rpl3l	1449398_at	Rpl3l			1421897_at	Elk1	1424543_at	Nck1	1421195_at	Cckar	1449360_at	Csf2rb2	1435652_a_at	Gnai2	1417878_at	E2f1	1433540_x_at	Ppp1cb
								1435203_at	Man2a2					1416456_a_at	Chia	1434034_at	Cerk													1460175_at	Rps23	1460175_at	Rps23			1450549_s_at	Elk4	1416796_at	Nck2	1460663_at	Cckbr	1419427_at	Csf3	1428645_at	Gnai3	1427462_at	E2f3	1450149_a_at	Ppp1cc
								1434187_at	Alg11					1417773_at	Nans	1439492_at	Sptlc3													1434231_x_at	Rpl35	1434231_x_at	Rpl35			1423011_at	Mecom	1422687_at	Nras	1433741_at	Cd38	1418806_at	Csf3r	1417432_a_at	Gnb1	1460207_s_at	E2f5	1456390_at	Ppp2ca
								1451368_at	Alg1					1425303_at	Gck	1451355_at	Acer2													1417615_a_at	Rpl11	1417615_a_at	Rpl11			1460251_at	Fas	1421017_at	Nrg3	1439611_at	Chrm1	1449093_at	Ctf1	1450623_at	Gnb2	1439704_at	Hdac2	1421823_a_at	Ppp2cb
								1460742_at	Alg3					1456516_x_at	LOC640502 /// Uap1	1422691_at	Sptlc1													1439374_x_at	Rps10	1439374_x_at	Rps10			1418803_a_at	Fasl	1420979_at	Pak1	1422258_at	Chrm3	1450020_at	Cx3cr1	1449159_at	Gnb3	1444755_at	Mad1l1	1452056_s_at	Ppp3ca
								1452037_at	Mgat2					1422185_a_at	Cyb5r3	1457867_at	Sgpp2													1438507_x_at	Rpl14	1438507_x_at	Rpl14			1423136_at	Fgf1	1437318_at	Pak3	1455629_at	Drd1a	1451877_at	Eda	1419470_at	Gnb4	1442062_at	7120426M23Rik	1433835_at	Ppp3cb
								1424818_at	Alg12					1428228_at	Pgm3	1457403_at	9130409I23Rik													1415879_a_at	Rplp2	1415879_a_at	Rplp2			1420690_at	Fgf10	1423144_at	Pik3ca	1433525_at	Ednra	1419724_at	Edar	1422208_a_at	Gnb5	1454960_at	Smad3	1430025_at	Ppp3cc
								1452235_at	Man1b1					1451540_at	Mpi															1423032_at	LOC100503815 /// LOC100504784 /// Rpl39	1423032_at	LOC100503815 /// LOC100504784 /// Rpl39			1439959_at	Fgf11	1453281_at	Pik3cd	1423594_a_at	Ednrb	1418093_a_at	Egf	1425219_x_at	Gngt1	1422487_at	Smad4	1433591_at	Ppp3r1
								1424366_at	Dolk					1435490_at	Hk3															1450417_a_at	Rps20	1450417_a_at	Rps20			1451693_a_at	Fgf12	1438682_at	Pik3r1	1457563_at	Egfr	1457563_at	Egfr	1450649_at	Gng10	1449705_x_at	Mcm3	1437535_at	Ppp3r2
								1436193_at	Man1c1					1426460_a_at	Ugp2															1433472_x_at	Rpl38	1433472_x_at	Rpl38			1418498_at	Fgf13	1418463_at	Pik3r2	1424919_at	Erbb2	1423344_at	Epor	1421947_at	Gng12	1448777_at	Mcm2	1424286_at	Prkx
								1434819_at	St6gal2					1439428_x_at	Gmds															1425183_a_at	Rpl4	1425183_a_at	Rpl4			1435747_at	Fgf14	1456482_at	Pik3r3	1434606_at	Erbb3	1460251_at	Fas	1428156_at	Gng2	1436708_x_at	Mcm4	1416896_at	Rps6ka1
								1434531_at	Mgat5b					1443841_x_at	Uap1l1															1435429_x_at	Rps27l	1435429_x_at	Rps27l			1418376_at	Fgf15	1437393_at	Prkca	1427783_at	Erbb4	1418803_a_at	Fasl	1417428_at	Gng3	1459658_at	Mcm5	1441311_at	Rps6ka2
								1444347_at	Mgat4a					1454634_at	Fuk															1455578_x_at	Rpl41	1455578_x_at	Rpl41			1421523_at	Fgf17	1443144_at	Prkcb	1437308_s_at	F2r	1449528_at	Figf	1447669_s_at	Gng4	1416251_at	Mcm6	1425977_a_at	Slk
								1455455_at	Glt28d2					1434855_at	Amdhd2															1417126_a_at	Rpl22l1	1417126_a_at	Rpl22l1			1449545_at	Fgf18	1455758_at	Prkcc	1434254_at	Gna11	1451756_at	Flt1	1455190_at	Gng7	1438320_s_at	Mcm7	1424511_at	Aurka
								1439007_at	Alg6					1459448_at	Cyb5r2															1423327_at	Rpl39l	1423327_at	Rpl39l			1449826_a_at	Fgf2	1442963_at	Plcg1	1449848_at	Gna14	1419538_at	Flt3	1457755_at	Gng8	1434443_at	Anapc1	1423148_at	Skp1a
								1437879_at	Alg10b					1439030_at	Gmppb															1459856_at		1459856_at				1441914_x_at	Fgf3	1422854_at	Shc1	1421302_a_at	Gna15	1444052_at	Flt4	1428733_at	Gngt2	1423605_a_at	Mdm2	1450560_a_at	Ppp2r5d
								1455887_at	Alg8																					1430978_at	Rps25	1430978_at	Rps25			1420086_x_at	Fgf4	1450326_at	Shc3	1439957_at	Gnal	1419139_at	Gdf5	1420355_at	Grk4	1424942_a_at	Myc	1435702_s_at	Ywhae
																														1428152_a_at	Rpl18a	1428152_a_at	Rpl18a			1438883_at	Fgf5	1421885_at	Sos1	1447593_x_at	Gnaq	1451871_a_at	Ghr	1449514_at	Grk5	1449773_s_at	Gadd45b	1420817_at	Ywhag
																														1433689_s_at	Rps9	1433689_s_at	Rps9			1427582_at	Fgf6	1452281_at	Sos2	1450186_s_at	Gnas	1457644_s_at	Cxcl1	1449111_a_at	Grb2	1422663_at	Orc1	1416004_at	Ywhah
																														1424377_at	Rsl24d1	1424377_at	Rsl24d1			1422243_at	Fgf7	1450918_s_at	Src	1437968_at	Grin1	1451866_a_at	Hgf	1457644_s_at	Cxcl1	1418227_at	Orc2	1432842_s_at	LOC100503129 /// Ywhaq
																														1453752_at	Rpl17	1453752_at	Rpl17			1451882_a_at	Fgf8	1421469_a_at	Stat5a	1421616_at	Grin2a	1418930_at	Cxcl10	1449455_at	Hck	1417947_at	Pcna	1436981_a_at	LOC100505062 /// Ywhaz
																																				1420795_at	Fgf9	1422103_a_at	Stat5b	1449245_at	Grin2c	1450564_x_at	Ifna1	1422407_s_at	Hras1	1448191_at	Plk1	1417830_at	Smc1a
																																				1425911_a_at	Fgfr1	1421942_s_at	Tgfa	1421393_at	Grin2d	1423028_at	Ifna2	1418930_at	Cxcl10	1451576_at	Prkdc	1416351_at	Map2k1
																																				1443211_at		1435260_at	Akt3	1425700_at	Grm1	1422408_at	Ifna4	1445141_at		1416161_at	Rad21	1453104_at	Mapk1
																																				1421841_at	Fgfr3	1416351_at	Map2k1	1450260_at	Grpr	1450614_x_at	Ifna5	1435647_at	Ikbkg	1444400_at	Rb1	1427060_at	Mapk3
																																				1427845_at	Fgfr4	1460636_at	Map2k2	1419210_at	Hrh1	1422406_at	Ifna9	1452518_a_at	Itk	1432604_at	Rbl1	1455520_at	Ppp2r5c
																																				1423100_at	Fos	1426233_at	Map2k4	1423639_at	Hrh2	1450613_x_at	Ifnab	1421065_at	Jak2	1418146_a_at	Rbl2	1428462_at	Ppp2r5e
																																				1455008_at	Gna12	1425513_at	Map2k7	1422125_at	Htr2b	1449026_at	Ifnar1	1425750_a_at	Jak3	1421940_at	Stag1	1448174_at	Cul1
																																				1421947_at	Gng12	1453104_at	Mapk1	1450477_at	Htr2c	1427691_a_at	Ifnar2	1451979_at	Kras	1421849_at	Stag2	1449283_a_at	Mapk12
																																				1449111_a_at	Grb2	1448342_at	Mapk10	1427654_a_at	Htr4	1422305_at	Ifnb1	1419412_at	Xcl1	1423148_at	Skp1a	1438390_s_at	Pttg1
																																				1416505_at	Nr4a1	1427060_at	Mapk3	1443276_at	Htr5a	1425947_at	Ifng	1456907_at	Cxcl9	1423241_a_at	Tfdp1	1460229_at	Stag3
																																				1422407_s_at	Hras1	1440856_at	Mapk8	1422196_at	Htr5b	1448167_at	Ifngr1	1451767_at	Ncf1	1420653_at	Tgfb1	1455929_x_at	Ppp2r1a
																																				1455789_x_at	Hspa8	1421878_at	Mapk9	1421757_at	Htr6	1423557_at	Ifngr2	1427705_a_at	Nfkb1	1423250_a_at	Tgfb2	1423931_s_at	Anapc4
																																				1419625_at	Hspa1l	1422707_at	Pik3cg	1435332_at	Htr7	1450330_at	Il10	1438157_s_at	Nfkbia	1417455_at	Tgfb3	1433430_s_at	Cdc23
																																				1422943_a_at	Hspb1	1437001_at	Gsk3b	1417279_at	Itpr1	1448731_at	Il10ra	1421266_s_at	Nfkbib	1457623_x_at	Trp53	1420878_a_at	Ywhab
																																				1427126_at	Hspa1b	1446185_at	Mtor	1427287_s_at	Itpr2	1419455_at	Il10rb	1422687_at	Nras	1442594_at	Ttk	1441713_at	Anapc7
																																				1417101_at	Hspa2	1422268_a_at	Rps6kb2	1417297_at	Itpr3	1449982_at	Il11	1420979_at	Pak1	1416773_at	Wee1	1440061_at	Rbx1
																																				1445141_at		1428548_at	Pak4	1450192_at	Lhcgr	1425454_a_at	Il12a	1423144_at	Pik3ca	1435702_s_at	Ywhae	1419147_at	Rec8
																																				1435647_at	Ikbkg	1428849_at	Rps6kb1	1429887_at	Nos1	1419530_at	Il12b	1453281_at	Pik3cd	1420817_at	Ywhag	1433822_x_at	Anapc5
																																				1421473_at	Il1a	1453069_at	Pik3cb	1420393_at	Nos2	1418166_at	Il12rb1	1438682_at	Pik3r1	1416004_at	Ywhah	1459212_at	Anapc11
																																				1449399_a_at	Il1b	1422666_at	Cblc	1422622_at	Nos3	1421623_at	Il12rb2	1418463_at	Pik3r2	1432842_s_at	LOC100503129 /// Ywhaq	1456860_at	Cdc26
																																				1459777_at	Il1r1	1421681_at	Nrg4	1420799_at	Ntsr1	1420802_at	Il13	1456482_at	Pik3r3	1436981_a_at	LOC100505062 /// Ywhaz	1429760_at	Rps6ka6
																																				1419532_at	Il1r2	1427763_a_at	Camk2d	1440888_at	Oxtr	1425625_at	Il13ra1	1447720_x_at	Prkaca	1416224_at	Zbtb17	1429499_at	Fbxo5
																																				1417409_at	Jun	1435434_at	Braf	1429794_a_at	P2rx1	1418219_at	Il15	1420610_at	Prkacb	1417019_a_at	Cdc6	1429376_s_at	Anapc10
																																				1440265_at	Jund	1420090_at	Raf1	1425525_a_at	P2rx4	1422397_a_at	Il15ra	1443144_at	Prkcb	1453851_a_at	Gadd45g	1452586_at	Anapc13
																																				1451979_at	Kras	1437304_at	Cblb	1439787_at	P2rx7	1421672_at	Il17a	1442256_at	Prkcd	1417830_at	Smc1a	1425554_a_at	Cdc16
																																				1448113_at	Stmn1	1456524_at	Nrg1	1450327_at	P2rx6	1420905_at	Il17ra	1449692_at	Prkcz	1431172_at	Orc4	1431130_at	2010110P09Rik
																																				1426648_at	Mapkapk2	1455200_at	Pak6	1431625_at	Pde1a	1417932_at	Il18	1435043_at	Plcb1	1415830_at	Orc5	1418608_at	Calml3
																																				1417016_at	Mapkapk5	1441356_at	Shc2	1449420_at	Pde1b	1456545_at	Il18rap	1452481_at	Plcb2	1448174_at	Cul1	1429470_at	Spdya
																																				1423501_at	Max	1454887_at	Pak2	1440374_at	Pde1c	1421473_at	Il1a	1448661_at	Plcb3	1418334_at	Dbf4	1460348_at	Mad2l2
																																				1451506_at	Mef2c	1426926_at	Plcg2	1421917_at	Pdgfra	1449399_a_at	Il1b	1425338_at	Plcb4	1418969_at	Skp2	1418919_at	Sgol1
																																				1417630_at	Mknk1	1440981_at	Pak7	1417148_at	Pdgfrb	1459777_at	Il1r1	1424286_at	Prkx	1438390_s_at	Pttg1	1428265_at	Ppp2r1b
																																				1449029_at	Mknk2	1434980_at	Pik3r5	1422743_at	Phka1	1419532_at	Il1r2	1434653_at	Ptk2b	1416117_at	Orc3	1432185_a_at	Spdyb
																																				1450775_at	Mos	1444491_at	Nrg2	1422315_x_at	Phkg1	1442614_at	Il1rap	1456135_s_at	Pxn	1422747_at	Chek2	1427415_at	Fbxo43
																																				1453419_at	Mras			1447720_x_at	Prkaca	1421628_at	Il18r1	1451086_s_at	Rac1	1423931_s_at	Anapc4	1450633_at	Calm4
																																				1424719_a_at	Mapt			1420610_at	Prkacb	1449990_at	Il2	1417620_at	Rac2	1433430_s_at	Cdc23	1415707_at	Anapc2
																																				1424942_a_at	Myc			1437393_at	Prkca	1420691_at	Il2ra	1417804_at	Rasgrp2	1420878_a_at	Ywhab	1447294_at	Fbxw11
																																				1449773_s_at	Gadd45b			1443144_at	Prkcb	1448759_at	Il2rb	1419536_a_at	Rela	1448612_at	Sfn	1418098_at	Adcy4
																																				1438067_at	Nf1			1455758_at	Prkcc	1416296_at	Il2rg	1441162_at	Rock1	1441713_at	Anapc7	1421959_s_at	Adcy3
																																				1425990_a_at	Nfatc2			1435043_at	Plcb1	1450566_at	Il3	1451041_at	Rock2	1419451_at	Fzr1	1433862_at	Espl1
																																				1427705_a_at	Nfkb1			1452481_at	Plcb2	1419712_at	Il3ra	1421688_a_at	Ccl1	1440061_at	Rbx1	1439377_x_at	Cdc20
																																				1425902_a_at	Nfkb2			1448661_at	Plcb3	1449864_at	Il4	1417789_at	Ccl11	1417037_at	Orc6	1427763_a_at	Camk2d
																																				1419675_at	Ngf			1425338_at	Plcb4	1421034_a_at	Il4ra	1419413_at	Ccl17	1437001_at	Gsk3b	1427299_at	Rps6ka3
																																				1419112_at	Nlk			1416675_s_at	Plcd1	1450550_at	Il5	1420380_at	Ccl2	1433822_x_at	Anapc5	1422658_at	Plcz1
																																				1422687_at	Nras			1432927_at	Plcd4	1421620_at	Il5ra	1422029_at	Ccl20	1459212_at	Anapc11	1449253_at	Smc1b
																																				1450803_at	Ntf3			1442963_at	Plcg1	1450297_at	Il6	1417925_at	Ccl22	1456860_at	Cdc26	1455462_at	Adcy2
																																				1443990_at	Ntrk1			1460332_at	Pln	1452416_at	Il6ra	1458277_at	Ccl25	1418585_at	Ccnh	1433849_at	Cdc27
																																				1420838_at	Ntrk2			1452056_s_at	Ppp3ca	1437303_at	Il6st	1434962_x_at	Ccl27a /// Ccl27b	1429376_s_at	Anapc10	1443080_at	Adcy5
																																				1428864_at	5530400B01Rik /// Dusp8			1433835_at	Ppp3cb	1436861_at	Il7	1419561_at	Ccl3	1452586_at	Anapc13	1426811_at	Ppp2r5b
																																				1420979_at	Pak1			1430025_at	Ppp3cc	1448576_at	Il7r	1421578_at	Ccl4	1425554_a_at	Cdc16	1440189_at	Ppp2r5a
																																				1449187_at	Pdgfa			1433591_at	Ppp3r1	1450565_at	Il9	1418126_at	Ccl5	1460348_at	Mad2l2	1419944_at	LOC100504316 /// LOC100505168
																																				1450414_at	Pdgfb			1437535_at	Ppp3r2	1421570_at	Il9r	1417266_at	Ccl6	1415707_at	Anapc2	1438601_at	Pkmyt1
																																				1421917_at	Pdgfra			1424286_at	Prkx	1458291_at	Inhba	1421228_at	Ccl7	1451480_at	E2f4	1456487_at	Adcy1
																																				1417148_at	Pdgfrb			1427871_at	Ptafr	1426859_at	Inhbb	1448898_at	Ccl9	1433862_at	Espl1
																																				1447720_x_at	Prkaca			1450491_at	Ptger1	1422001_at	Inhbc	1456428_at	Cxcl15	1439377_x_at	Cdc20
																																				1420610_at	Prkacb			1450344_a_at	Ptger3	1422144_at	Inhbe	1449984_at	Cxcl2	1449253_at	Smc1b
																																				1437393_at	Prkca			1449828_at	Ptgfr	1449379_at	Kdr	1419728_at	Cxcl5	1427744_at	Ccnb3
																																				1443144_at	Prkcb			1434653_at	Ptk2b	1415900_a_at	Kit	1415803_at	Cx3cl1	1443962_at	Tfdp2
																																				1455758_at	Prkcc			1427306_at	Ryr1	1422582_at	Lep	1417574_at	Cxcl12	1433849_at	Cdc27
																																				1433948_at	Pla2g1b			1421126_at	Ryr2	1456156_at	Lepr	1422854_at	Shc1	1437070_at	Cdc14b
																																				1450128_at	Pla2g2a			1432133_at	Ryr3	1421207_at	Lif	1450326_at	Shc3	1436913_at	Cdc14a
																																				1420584_at	Pla2g2c			1420210_at	Slc8a1	1425107_a_at	Lifr	1421885_at	Sos1	1455790_at	E2f2
																																				1418987_at	Pla2g2d			1451596_a_at	Sphk1	1419412_at	Xcl1	1452281_at	Sos2	1427197_at	Atr
																																				1448558_a_at	Pla2g4a			1422282_at	Tacr1	1420353_at	Lta	1420915_at	Stat1	1419944_at	LOC100504316 /// LOC100505168
																																				1417814_at	Pla2g5			1422234_at	Tacr2	1419135_at	Ltb	1450403_at	Stat2	1438601_at	Pkmyt1
																																				1453171_s_at	Ppm1a			1450278_at	Tacr3	1416435_at	Ltbr	1459961_a_at	Stat3	1436751_at	Wee2
																																				1426382_at	Ppm1b			1419222_at	Tbxa2r	1434447_at	Met	1422103_a_at	Stat5b	1448246_at	Hdac1
																																				1452056_s_at	Ppp3ca			1418370_at	Tnnc1	1415855_at	Kitl	1418057_at	Tiam1
																																				1433835_at	Ppp3cb			1417464_at	Tnnc2	1456907_at	Cxcl9	1422932_a_at	Vav1
																																				1430025_at	Ppp3cc			1449571_at	Trhr	1451919_a_at	Mpl	1421272_at	Vav2
																																				1433591_at	Ppp3r1			1421096_at	Trpc1	1454903_at	Ngfr	1419631_at	Was
																																				1437535_at	Ppp3r2			1437452_x_at	Vdac1	1449033_at	Tnfrsf11b	1435260_at	Akt3
																																				1451242_a_at	Ppp5c			1415990_at	Vdac2	1438767_at	Osm	1422294_at	Xcr1
																																				1421926_at	Mapk11			1416175_a_at	Vdac3	1459217_at	Osmr	1431222_at	Tiam2
																																				1440619_at	Mapk8ip1			1422204_at	Avpr1b	1449187_at	Pdgfa	1421361_at	Grk1
																																				1424286_at	Prkx			1421129_a_at	Atp2a3	1450414_at	Pdgfb	1451672_at	Grk6
																																				1448830_at	Dusp1			1418603_at	Avpr1a	1421917_at	Pdgfra	1416351_at	Map2k1
																																				1425131_at	Ptpn5			1449955_at	Cacna1f	1417148_at	Pdgfrb	1453104_at	Mapk1
																																				1426047_a_at	Ptprr			1417431_a_at	Sphk2	1429287_a_at	Prl	1427060_at	Mapk3
																																				1451086_s_at	Rac1			1450807_at	Ltb4r2	1441102_at	Prlr	1422707_at	Pik3cg
																																				1417620_at	Rac2			1422710_a_at	Cacna1h	1421688_a_at	Ccl1	1448859_at	Cxcl13
																																				1417804_at	Rasgrp2			1449282_at	Cysltr1	1417789_at	Ccl11	1419697_at	Cxcl11
																																				1422600_at	Rasgrf1			1428937_at	Atp2b1	1419413_at	Ccl17	1450488_at	Ccl24
																																				1440918_at	Rasgrf2			1428511_at	Phkg2	1422029_at	Ccl20	1450236_at	Foxo3
																																				1450143_at	Rasgrp1			1421642_a_at	Cysltr2	1417925_at	Ccl22	1437001_at	Gsk3b
																																				1419536_a_at	Rela			1431130_at	2010110P09Rik	1458277_at	Ccl25	1448995_at	Pf4
																																				1417856_at	Relb			1418608_at	Calml3	1434962_x_at	Ccl27a /// Ccl27b	1450217_at	Ccl28
																																				1416896_at	Rps6ka1			1431892_a_at	Plcd3	1419561_at	Ccl3	1448600_s_at	Vav3
																																				1441311_at	Rps6ka2			1453133_at	Slc25a31	1421578_at	Ccl4	1418456_a_at	Cxcl14
																																				1418448_at	Rras			1452398_at	Plce1	1418126_at	Ccl5	1418480_at	Ppbp
																																				1421885_at	Sos1			1450633_at	Calm4	1417266_at	Ccl6	1419414_at	Gng13
																																				1452281_at	Sos2			1449433_at	P2rx5	1421228_at	Ccl7	1448942_at	Gng11
																																				1418256_at	Srf			1434511_at	Phkb	1448898_at	Ccl9	1449195_s_at	Cxcl16
																																				1420653_at	Tgfb1			1418098_at	Adcy4	1456428_at	Cxcl15	1426777_a_at	Wasl
																																				1423250_a_at	Tgfb2			1421959_s_at	Adcy3	1449984_at	Cxcl2	1453069_at	Pik3cb
																																				1417455_at	Tgfb3			1425506_at	Mylk	1419728_at	Cxcl5	1422812_at	Cxcr6
																																				1420895_at	Tgfbr1			1427763_a_at	Camk2d	1415803_at	Cx3cl1	1420391_at	Pard3
																																				1425444_a_at	Tgfbr2			1455272_at	Grm5	1417574_at	Cxcl12	1422808_s_at	Dock2
																																				1419607_at	Tnf			1434518_at	Phka2	1420653_at	Tgfb1	1418098_at	Adcy4
																																				1417291_at	Tnfrsf1a			1428054_at	Slc8a2	1423250_a_at	Tgfb2	1421959_s_at	Adcy3
																																				1451233_at	Traf2			1440962_at	Slc8a3	1417455_at	Tgfb3	1460444_at	Arrb1
																																				1435350_at	Traf6			1422658_at	Plcz1	1420895_at	Tgfbr1	1435434_at	Braf
																																				1457623_x_at	Trp53			1450356_at	Trhr2	1425444_a_at	Tgfbr2	1448020_at	Rap1a
																																				1435260_at	Akt3			1455462_at	Adcy2	1419607_at	Tnf	1420090_at	Raf1
																																				1453851_a_at	Gadd45g			1439101_at	Mylk3	1422344_s_at	Tnfrsf10b	1451992_at	Adrbk1
																																				1430180_at	Map2k5			1458396_at	P2rx3	1419214_at	Tnfrsf11a	1424523_at	Elmo1
																																				1418060_a_at	Mapk7			1424037_at	Itpka	1420782_at	Tnfrsf17	1455462_at	Adcy2
																																				1416351_at	Map2k1			1427556_at	Mylk2	1422303_a_at	Tnfrsf18	1435519_at	Rap1b
																																				1460636_at	Map2k2			1435212_at	P2rx2	1417291_at	Tnfrsf1a	1441356_at	Shc2
																																				1451714_a_at	Map2k3			1426926_at	Plcg2	1448951_at	Tnfrsf1b	1426239_s_at	Arrb2
																																				1426233_at	Map2k4			1435272_at	Itpkb	1449473_s_at	Cd40	1443080_at	Adcy5
																																				1426850_a_at	Map2k6			1442645_at	Atp2b3	1452389_at	Cd27	1434069_at	Prex1
																																				1425513_at	Map2k7			1445701_at	Atp2b4	1421649_at	Tnfrsf8	1434980_at	Pik3r5
																																				1424850_at	Map3k1			1456487_at	Adcy1	1428034_a_at	Tnfrsf9	1456487_at	Adcy1
																																				1450669_at	Map3k11					1451944_a_at	Tnfsf11	1435638_at	Gsk3a
																																				1417115_at	Map3k12					1422283_at	Cd40lg	1457324_at
																																				1455597_at	Map3k2					1449926_at	Cd70
																																				1436522_at	Map3k3					1450272_at	Tnfsf8
																																				1421450_a_at	Map3k4					1422924_at	Tnfsf9
																																				1421340_at	Map3k5					1420600_at	Tpo
																																				1455441_at	Map3k7					1439680_at	Tnfsf10
																																				1419208_at	Map3k8					1420351_at	Tnfrsf4
																																				1439323_a_at	Map4k1					1421744_at	Tnfsf4
																																				1434833_at	Map4k2					1420909_at	Vegfa
																																				1453104_at	Mapk1					1451803_a_at	Vegfb
																																				1448342_at	Mapk10					1439766_x_at	Vegfc
																																				1448871_at	Mapk13					1422294_at	Xcr1
																																				1451927_a_at	Mapk14					1460255_at	Tnfsf13b
																																				1427060_at	Mapk3					1418571_at	Tnfrsf12a
																																				1440856_at	Mapk8					1448147_at	Tnfrsf19
																																				1421878_at	Mapk9					1420678_a_at	Il17rb
																																				1451502_at	Pla2g10					1450298_at	Tnfsf14
																																				1434184_s_at	Map4k4					1450004_at	Tslp
																																				1417080_a_at	Ecsit					1449351_s_at	Pdgfc
																																				1420674_at	Pla2g2e					1448859_at	Cxcl13
																																				1421325_at	Pla2g2f					1419697_at	Cxcl11
																																				1449283_a_at	Mapk12					1431693_a_at	Il17b
																																				1416437_a_at	Mapk8ip3					1450488_at	Ccl24
																																				1431278_s_at	Pla2g6					1450262_at	Clcf1
																																				1449901_a_at	Map3k6					1448995_at	Pf4
																																				1422999_at	Map3k14					1450217_at	Ccl28
																																				1450520_at	Cacng3					1418456_a_at	Cxcl14
																																				1455230_at	Cacng4					1418480_at	Ppbp
																																				1425730_at	Cacng6					1418097_a_at	Crlf2
																																				1449955_at	Cacna1f					1423182_at	Tnfrsf13b
																																				1418512_at	Stk3					1421608_at	Il20
																																				1431422_a_at	Dusp14					1450456_at	Il21r
																																				1448498_at	Rps6ka4					1450334_at	Il21
																																				1451955_a_at	Cacna2d2					1449195_s_at	Cxcl16
																																				1422710_a_at	Cacna1h					1426319_at	Pdgfd
																																				1434159_at	Stk4					1419307_at	Tnfrsf13c
																																				1449225_a_at	Mapk8ip2					1422812_at	Cxcr6
																																				1417163_at	Dusp10					1419529_at	Il23a
																																				1422176_at	Fgf23					1422231_a_at	Tnfrsf25
																																				1418943_at	B230120H23Rik					1426181_a_at	Il24
																																				1452026_a_at	Pla2g12a					1450731_s_at	Tnfrsf21
																																				1426898_at	Tab1					1438967_x_at	Amhr2
																																				1417398_at	Rras2					1420740_at	Il25
																																				1429760_at	Rps6ka6					1437876_at	Il20rb
																																				1460296_a_at	Fgf22					1445457_at	9130219A07Rik
																																				1415834_at	Dusp6					1452425_at	Tnfrsf14
																																				1423462_at	Tab2					1437665_at	Il22ra2
																																				1449073_at	Flnc					1446498_at	Il20ra
																																				1419614_at	Pla2g12b					1460598_at	Il28ra
																																				1431130_at	2010110P09Rik					1440085_at	Eda2r
																																				1440615_at	Dusp16					1455116_at	Relt
																																				1456769_at	Dusp3
																																				1439004_at	Rps6ka5
																																				1423380_s_at	Nfatc4
																																				1433844_a_at	Dusp9
																																				1452833_at	Rapgef2
																																				1453405_at	Pla2g4d
																																				1440353_at	Ntf5
																																				1421677_at	Fgf20
																																				1420806_at	Fgf16
																																				1439745_at	Cacng7
																																				1451864_at	Cacng8
																																				1437494_at	Mapkapk3
																																				1448985_at	Dusp22
																																				1460444_at	Arrb1
																																				1435434_at	Braf
																																				1448020_at	Rap1a
																																				1420090_at	Raf1
																																				1427299_at	Rps6ka3
																																				1422785_at	Rasa2
																																				1434785_at	Cacng5
																																				1420554_a_at	Rac3
																																				1426677_at	Flna
																																				1452388_at	Hspa1a
																																				1435519_at	Rap1b
																																				1426239_s_at	Arrb2
																																				1455432_at	Taok1
																																				1426478_at	Rasa1
																																				1454887_at	Pak2
																																				1446798_at	Map4k3
																																				1425380_at	Rasgrp4
																																				1460393_a_at	Dusp7
																																				1456231_at	Pla2g3
																																				1438030_at	Rasgrp3
																																				1437199_at	Dusp5
																																				1426750_at	Flnb
																																				1428834_at	Dusp4
																																				1442863_at	Cacna2d4
																																				1429862_at	Pla2g4e
[truncated: 118 more columns]

## Sheet: 48up
00010: Glycolysis / Gluconeogenesis(57)		00051: Fructose and mannose metabolism(36)		00053: Ascorbate and aldarate metabolism(14)		00071: Fatty acid metabolism(41)		00260: Glycine, serine and threonine metabolism(30)		00270: Cysteine and methionine metabolism(35)		00280: Valine, leucine and isoleucine degradation(46)		00310: Lysine degradation(43)		00340: Histidine metabolism(26)		00360: Phenylalanine metabolism(16)		00380: Tryptophan metabolism(40)		00511: Other glycan degradation(16)		00533: Glycosaminoglycan biosynthesis - keratan sulfate(14)		00562: Inositol phosphate metabolism(56)		00591: Linoleic acid metabolism(40)		00592: alpha-Linolenic acid metabolism(19)		00603: Glycosphingolipid biosynthesis - globo series(15)		00620: Pyruvate metabolism(40)		00640: Propanoate metabolism(29)		00670: One carbon pool by folate(17)		00760: Nicotinate and nicotinamide metabolism(23)		00770: Pantothenate and CoA biosynthesis(15)		00790: Folate biosynthesis(11)		00980: Metabolism of xenobiotics by cytochrome P450(59)		00982: Drug metabolism - cytochrome P450(67)
ID	Gene Symbol	ID	Gene Symbol	ID	Gene Symbol	ID	Gene Symbol	ID	Gene Symbol	ID	Gene Symbol	ID	Gene Symbol	ID	Gene Symbol	ID	Gene Symbol	ID	Gene Symbol	ID	Gene Symbol	ID	Gene Symbol	ID	Gene Symbol	ID	Gene Symbol	ID	Gene Symbol	ID	Gene Symbol	ID	Gene Symbol	ID	Gene Symbol	ID	Gene Symbol	ID	Gene Symbol	ID	Gene Symbol	ID	Gene Symbol	ID	Gene Symbol	ID	Gene Symbol	ID	Gene Symbol
1416225_at	Adh1	1451461_a_at	Aldoc	1416468_at	Aldh1a1	1448987_at	Acadl	1418833_at	Agxt	1448484_at	Amd1	1415984_at	Acadm	1416468_at	Aldh1a1	1418472_at	Aspa	1418752_at	Aldh3a1	1421666_a_at	Aanat	1434665_at	Aga	1418014_a_at	B4galt1	1418045_at	Inpp1	1450715_at	Cyp1a2	1416408_at	Acox1	1418248_at	Gla	1416468_at	Aldh1a1	1415984_at	Acadm	1419172_at	Dhfr	1419435_at	Aox1	1450871_a_at	Bcat1	1423611_at	Alpl	1416225_at	Adh1	1416225_at	Adh1
1421058_at	Adh7	1448319_at	Akr1b3	1434988_x_at	Aldh2	1415984_at	Acadm	1455282_x_at	Alas1	1423147_at	Mat1a	1460216_at	Acads	1434988_x_at	Aldh2	1416468_at	Aldh1a1	1449396_at	Aoc3	1416468_at	Aldh1a1	1416205_at	Glb1	1450406_a_at	St3gal3	1451330_a_at	Inpp5b	1417651_at	Cyp2c29	1437015_x_at	Pla2g1b	1450359_at	Fut1	1434988_x_at	Aldh2	1416468_at	Aldh1a1	1419670_at	Ftcd	1449454_at	Bst1	1425764_a_at	Bcat2	1450572_at	Akp3	1421058_at	Adh7	1421058_at	Adh7
1416185_a_at	Adh5	1423556_at	Akr1b7	1415776_at	Aldh3a2	1424184_at	Acadvl	1451675_a_at	Alas2	1450624_at	Bhmt	1416468_at	Aldh1a1	1415776_at	Aldh3a2	1434988_x_at	Aldh2	1442878_at	Prdx6	1434988_x_at	Aldh2	1437044_a_at	Gba	1441216_at	St3gal1	1460394_a_at	Inppl1	1419094_at	Cyp2c37	1450128_at	Pla2g2a	1434862_at	Fut2	1415776_at	Aldh3a2	1434988_x_at	Aldh2	1424436_at	Gart	1433741_at	Cd38	1419276_at	Enpp1	1450635_at	Alppl2	1416185_a_at	Adh5	1416185_a_at	Adh5
1416468_at	Aldh1a1	1449088_at	Fbp2	1416308_at	Ugdh	1460216_at	Acads	1449396_at	Aoc3	1423844_s_at	Cbs	1434988_x_at	Aldh2	1455972_x_at	Hadh	1418752_at	Aldh3a1	1430591_at	Ddc	1415776_at	Aldh3a2	1449024_a_at	Hexa	1421892_at	St3gal2	1423265_at	Minpp1	1452501_at	Cyp2c38	1420584_at	Pla2g2c	1450771_at	Fut9	1448319_at	Akr1b3	1415776_at	Aldh3a2	1419253_at	Mthfd2	1432517_a_at	Nnmt	1418486_at	Vnn1	1419172_at	Dhfr	1418752_at	Aldh3a1	1418752_at	Aldh3a1
1434988_x_at	Aldh2	1448470_at	Fbp1	1419622_at	Ugt2b5	1416408_at	Acox1	1450624_at	Bhmt	1448842_at	Cdo1	1415776_at	Aldh3a2	1440972_at	Nsd1	1415776_at	Aldh3a2	1437612_at		1419435_at	Aox1	1437874_s_at	Hexb	1453393_a_at	Chst4	1443655_s_at	Pik3c2a	1421363_at	Cyp2c39	1418987_at	Pla2g2d	1449024_a_at	Hexa	1423556_at	Akr1b7	1419737_a_at	Ldha	1450498_at	Mthfr	1416105_at	Nnt	1436291_a_at	Dpys	1460673_at	Fpgs	1422217_a_at	Cyp1a1	1419435_at	Aox1
1418752_at	Aldh3a1	1448894_at	Akr1b8	1416460_at	Miox	1416225_at	Adh1	1423844_s_at	Cbs	1435122_x_at	Dnmt1	1419435_at	Aox1	1451274_at	Ogdh	1430591_at	Ddc	1450970_at	Got1	1416430_at	Cat	1416340_a_at	Man2b1	1418080_at	B4galt2 /// Ccdc24	1421704_a_at	Pik3c2g	1415994_at	Cyp2e1	1448558_a_at	Pla2g4a	1437874_s_at	Hexb	1433263_at	Dld	1416183_a_at	Ldhb	1425178_s_at	Shmt1	1419276_at	Enpp1	1424336_at	Ppcdc	1420499_at	Gch1	1450715_at	Cyp1a2	1450715_at	Cyp1a2
1415776_at	Aldh3a2	1437974_a_at	Hk1	1436689_a_at	Aldh9a1	1421058_at	Adh7	1420709_s_at	Dao	1419750_at	Trdmt1	1458436_at	Auh	1416289_at	Plod1	1419670_at	Ftcd	1417716_at	Got2	1422217_a_at	Cyp1a1	1416584_at	Man2b2	1456367_at	Fut8	1440054_at	Pik3ca	1417531_at	Cyp2j5	1417814_at	Pla2g5	1449043_at	Naga	1448894_at	Akr1b8	1415847_at	Ldhc	1442192_at	Tyms	1416530_a_at	Pnp	1443829_x_at	Coasy	1419595_a_at	Ggh	1416612_at	Cyp1b1	1418821_at	Cyp2a12
1451461_a_at	Aldoc	1422612_at	Hk2	1424934_at	Ugt2b1	1416185_a_at	Adh5	1433263_at	Dld	1423063_at	Dnmt3a	1450871_a_at	Bcat1	1449374_at	Pipox	1418645_at	Hal	1424618_at	Hpd	1450715_at	Cyp1a2	1448481_at	Neu1	1422758_at	Chst2	1422991_at	Pik3cd	1417952_at	Cyp2j6	1451502_at	Pla2g10	1441216_at	St3gal1	1424171_a_at	Hagh	1416838_at	Mut	1457005_at	Mtfmt	1428547_at	Nt5e	1431948_a_at	Pank2	1450660_at	Pts	1422257_s_at	Cyp2b10	1422257_s_at	Cyp2b10
1415865_s_at	Bpgm	1449062_at	Khk	1450133_at	Ugt2a3	1416468_at	Aldh1a1	1422558_at	Gamt	1418351_a_at	Dnmt3b	1425764_a_at	Bcat2	1427382_a_at	Suv39h1	1454713_s_at	Hdc	1442676_at	Maoa	1416612_at	Cyp1b1	1431936_a_at	Neu2	1425934_a_at	B4galt4	1446974_at	Pikfyve	1416809_at	Cyp3a11	1420674_at	Pla2g2e	1421892_at	St3gal2	1419737_a_at	Ldha	1430402_at	Sucla2	1424401_at	Aldh1l1	1417252_at	Nt5c	1429813_at	Pank1	1432372_a_at	Spr	1449479_at	Cyp2b13	1449479_at	Cyp2b13
1433263_at	Dld	1427213_at	Pfkfb1	1451260_at	Aldh1b1	1434988_x_at	Aldh2	1417422_at	Gnmt	1437612_at		1416647_at	Bckdha	1418519_at	Aadat	1442676_at	Maoa	1416335_at	Mif	1430591_at	Ddc	1419339_at	Neu3	1419320_at	Chst5	1424954_a_at	Pip5k1c	1419523_at	Cyp3a13	1421325_at	Pla2g2f	1455695_at	St8sia1	1416183_a_at	Ldhb	1427441_a_at	Suclg2	1443021_at	Mthfs	1455320_at	Nampt	1427945_at	Dpyd	1431077_at	Alpi	1419731_at	Cyp2b19	1419731_at	Cyp2b19
1419023_x_at	Eno1 /// Gm5506 /// LOC100503183	1422092_at	Pfkfb2	1427960_at	Ugt2b34	1415776_at	Aldh3a2	1442676_at	Maoa	1450970_at	Got1	1427153_at	Bckdhb	1416687_at	Plod2	1456118_at	Mettl2	1454638_a_at	Pah	1437612_at		1416046_a_at	Fuca2	1449435_at	B4galt3	1419280_at	Pip4k2a	1421741_at	Cyp3a16	1431277_at	Pla2g6	1418736_at	B3galnt1	1415847_at	Ldhc	1415891_at	Suclg1	1455084_x_at	Shmt2	1425773_s_at	Nmnat1	1460244_at	Upb1	1423664_at	Qdpr	1419590_at	Cyp2b9	1419590_at	Cyp2b9
1418829_a_at	Eno2	1450269_a_at	Pfkl	1460167_at	Aldh7a1	1434866_x_at	Cpt1a	1449374_at	Pipox	1417716_at	Got2	1449118_at	Dbt	1415901_at	Plod3	1436689_a_at	Aldh9a1	1448789_at	Aldh1a3	1455972_x_at	Hadh	1456155_x_at	Fuca1	1449147_at	Chst1	1450389_s_at	Pip5k1b	1437015_x_at	Pla2g1b	1443838_x_at	Fads2	1455784_at	Sec1	1430307_a_at	Me1	1449964_a_at	Mlycd	1452811_at	Atic	1418836_at	Qprt	1417473_a_at	Ppcs			1417651_at	Cyp2c29	1417651_at	Cyp2c29
1417951_at	Eno3	1416780_at	Pfkm	1455595_at	Ugt2b36	1416772_at	Cpt2	1425178_s_at	Shmt1	1419737_a_at	Ldha	1433263_at	Dld	1423523_at	Aass	1448789_at	Aldh1a3	1452301_at	Aldh3b1	1420437_at	Ido1	1423687_a_at	Man2c1	1452346_at	B3gnt1	1435039_a_at	Pip5k1a	1450128_at	Pla2g2a	1452026_a_at	Pla2g12a	1450528_at	B3galt5	1433984_a_at	Mdh2	1436689_a_at	Aldh9a1	1415916_a_at	Mthfd1	1453139_at	Nudt12	1427302_at	Enpp3			1419094_at	Cyp2c37	1419094_at	Cyp2c37
1449088_at	Fbp2	1426584_a_at	Sord	1451297_at	Gulo	1423257_at	Cyp4a14	1438549_a_at	Srr	1416183_a_at	Ldhb	1437612_at		1436689_a_at	Aldh9a1	1423575_a_at	Wbscr22	1417650_at	Lao1	1442676_at	Maoa	1450626_at	Manba	1436321_at	B3gnt7	1425782_at	Plcb1	1420584_at	Pla2g2c	1419614_at	Pla2g12b	1426148_at	Gbgt1	1436834_x_at	Mdh1	1422479_at	Acss2	1436119_at	Aldh1l2	1427715_a_at	Nt5c1b	1433613_at	Pank3			1452501_at	Cyp2c38	1452501_at	Cyp2c38
1448470_at	Fbp1	1435659_a_at	Tpi1			1418321_at	Dci	1449064_at	Tdh	1415847_at	Ldhc	1455972_x_at	Hadh	1422979_at	Suv39h2	1419290_at	Mettl6	1434354_at	Maob	1451274_at	Ogdh	1435289_at	Engase			1452481_at	Plcb2	1418987_at	Pla2g2d	1453405_at	Pla2g4d	1455338_at	A4galt	1439617_s_at	Pck1	1450969_at	Pccb	1458532_at	Mtr	1432342_at	Nmnat3	1435004_at	Pank4			1421363_at	Cyp2c39	1421363_at	Cyp2c39
1417880_at	G6pc	1448495_at	Tsta3			1460316_at	Acsl1	1423569_at	Gatm	1421260_a_at	Srm	1438391_x_at	Hsd17b10	1459779_s_at	Setd8	1452301_at	Aldh3b1	1451557_at	Tat	1418697_at	Inmt	1434844_at	Hexdc			1448661_at	Plcb3	1448558_a_at	Pla2g4a	1437352_at	Acox3			AFFX-PyruCarbMur/L09192_3_at	Pcx	1416617_at	Acss1	1456653_a_at	Mthfd1l	1425933_a_at	Nt5c2					1415994_at	Cyp2e1	1418113_at	Cyp2d10
AFFX-GapdhMur/M32599_M_at	Gapdh	1430780_a_at	Pmm1			1455972_x_at	Hadh	1428780_at	Tha1	1448609_at	Tst	1424639_a_at	Hmgcl	1451260_at	Aldh1b1	1430287_s_at	Hemk1			1419524_at	Tph1					1425339_at	Plcb4	1417814_at	Pla2g5	1456231_at	Pla2g3			1418560_at	Pdha1	1451260_at	Aldh1b1	1429599_a_at	Mthfd2l	1430359_a_at	Nadsyn1					1448792_a_at	Cyp2f2	1419349_a_at	Cyp2d9
1449974_at	Gapdhs	1421880_at	Mtmr1			1431012_a_at	Peci	1452311_at	Dmgdh	1425035_s_at	Dnmt3l	1423858_a_at	Hmgcs2	1435437_at	Setd7	1448539_a_at	Acy3			1437832_x_at	Wars					1448432_at	Plcd1	1451502_at	Pla2g10	1429862_at	Pla2g4e			1450962_at	Pdha2	1438477_a_at	Mcee			1453767_a_at	Nt5m					1416809_at	Cyp3a11	1415994_at	Cyp2e1
1434814_x_at	Gpi1	1431464_a_at	Pmm2			1422070_at	Adh4	1415673_at	Psph	1418254_at	Apip	1416838_at	Mut	1448382_at	Ehhadh	1447380_at	Amdhd1			1418519_at	Aadat					1432927_at	Plcd4	1420674_at	Pla2g2e	1437893_at	Plb1			1417308_at	Pkm2	1448382_at	Ehhadh			1451050_at	Nt5c3					1419523_at	Cyp3a13	1416809_at	Cyp3a11
1437974_a_at	Hk1	1427025_at	Mtmr7			1451828_a_at	Acsl4	1416049_at	Gldc	1424426_at	Mtap	1428146_s_at	Acaa2	1429389_at	Setmar	1451260_at	Aldh1b1			1449337_at	Tdo2					1442963_at	Plcg1	1421325_at	Pla2g2f					1438711_at	Pklr	1452341_at	Echs1			1416248_at	Nadk					1421741_at	Cyp3a16	1419523_at	Cyp3a13
1422612_at	Hk2	1416069_at	Pfkp			1428146_s_at	Acaa2	1426243_at	Cth	1423705_at	Enoph1	1449001_at	Ivd	1454776_at	Ehmt1	1424600_at	Abp1			1436689_a_at	Aldh9a1					1438446_x_at	Inpp5k	1431277_at	Pla2g6					1428613_at	Ldhd	1452173_at	Hadha			1427302_at	Enpp3					1422438_at	Ephx1	1421741_at	Cyp3a16
1419737_a_at	Ldha	1417578_a_at	Gmppa			1436689_a_at	Aldh9a1	1455084_x_at	Shmt2	1417146_at	Mri1	1436689_a_at	Aldh9a1	1423710_at	Dlst	1434354_at	Maob			1452678_a_at	Ccbl1					1455728_at	Pten	1424973_at	Cyp3a25					1436689_a_at	Aldh9a1	1427052_at	Acacb			1425646_at	BC016495					1421040_a_at	Gsta2	1417429_at	Fmo1
1416183_a_at	Ldhb	1427903_at	Phpt1			1455446_x_at	Acadsb	1434354_at	Maob	1452703_at	Ahcyl2	1423780_at	Hibadh	1416670_at	Setdb1	1460167_at	Aldh7a1			1429279_at	Wars2					1431828_a_at	Synj2	1452026_a_at	Pla2g12a					1422479_at	Acss2	1448104_at	Aldh6a1			1436155_at	Nmnat2					1423436_at	Gsta3	1449525_at	Fmo3
1415847_at	Ldhc	1429519_at	Fpgt			1451260_at	Aldh1b1	1460167_at	Aldh7a1	1417650_at	Lao1	1418272_at	Oxct2a	1452341_at	Echs1	1417702_a_at	Hnmt			1451903_at	Kynu					1435659_a_at	Tpi1	1419614_at	Pla2g12b					1439013_x_at	Acyp1	1434247_at	Ldhal6b									1416368_at	Gsta4	1450332_s_at	Fmo5
1439617_s_at	Pck1	1425459_at	Mtmr2			1448382_at	Ehhadh	1416662_at	Sardh	1449076_x_at	Adi1	1455446_x_at	Acadsb	1452173_at	Hadha	1451565_s_at	Uroc1			1428885_at	Afmid					1422707_at	Pik3cg	1419582_at	Cyp2c55					1448214_at	Pdhb	1424182_at	Acat1									1416416_x_at	Gstm1	1421040_a_at	Gsta2
1418560_at	Pdha1	1417085_at	Akr1c6			1428386_at	Acsl3	1455435_s_at	Chdh	1434247_at	Ldhal6b	1450969_at	Pccb	1435136_at	Whsc1	1455561_at	Cndp1			1451260_at	Aldh1b1					1436715_s_at	Cdipt	1429994_s_at	Cyp2c65					1416617_at	Acss1	1460167_at	Aldh7a1									1416411_at	Gstm2	1423436_at	Gsta3
1450962_at	Pdha2	1451540_at	Mpi			1435281_at	Cpt1c	1424744_at	Sds	1426243_at	Cth	1419261_at	Acad8	1460692_at	Ehmt2					1448382_at	Ehhadh					1423127_at	Impa1	1424677_at	Cyp2j9					1433650_at	Haghl	1451405_at	Pcca									1427473_at	Gstm3	1416368_at	Gsta4
1450269_a_at	Pfkl	1416432_at	Pfkfb3			1437352_at	Acox3	1424995_at	Glyctk	1448196_at	Mat2b	1428140_at	Oxct1	1424182_at	Acat1					1424600_at	Abp1					1416460_at	Miox	1453405_at	Pla2g4d					1451260_at	Aldh1b1	1451512_s_at	Hibch									1424835_at	Gstm4	1416416_x_at	Gstm1
1416780_at	Pfkm	1435490_at	Hk3			1452341_at	Echs1	1437621_x_at	Phgdh	1426830_a_at	Ahcyl1	1417227_at	Mccc1	1460167_at	Aldh7a1					1452341_at	Echs1					1423229_at	Inpp5e	1417085_at	Akr1c6					1449457_at	Acot12	1433855_at	Abat									1416842_at	Gstm5	1416411_at	Gstm2
1426554_a_at	Pgam1	1434158_at	Gmds			1452173_at	Hadha	1435838_at	Agxt2	1424744_at	Sds	1451260_at	Aldh1b1	1419618_at	Bbox1					1452173_at	Hadha					1420411_a_at	Pi4k2b	1440211_at	Cyp2j11-ps					1425615_a_at	Pck2											1422072_a_at	Gstm6	1427473_at	Gstm3
1439435_x_at	Pgk1	1425485_at	Mtmr6			1424182_at	Acat1			1423667_at	Mat2a	1438477_a_at	Mcee	1450071_at	Ash1l					1418998_at	Kmo					1436215_at	Ipmk	1418653_at	Cyp2c50					1427943_at	Acyp2											1449575_a_at	Gstp1	1424835_at	Gstm4
1416784_at	Pgk2	1451194_at	Aldob			1460167_at	Aldh7a1			1451557_at	Tat	1448382_at	Ehhadh	1420725_at	Tmlhe					1417650_at	Lao1					1415977_at	Isyna1	1424273_at	Cyp2c70					1417772_at	Grhpr											1418186_at	Gstt1	1416842_at	Gstm5
1417308_at	Pkm2	1454634_at	Fuk			1456737_x_at	Acaa1a			1458532_at	Mtr	1432472_a_at	Mccc2	1437353_at	Setd1b					1432492_a_at	Haao					1431892_a_at	Plcd3	1424576_s_at	Cyp2c44					1427052_at	Acacb											1417883_at	Gstt2	1422072_a_at	Gstm6
1438711_at	Pklr	1456888_at	Pfkfb4			1451257_at	Acsl6			1418356_at	Mpst	1452341_at	Echs1	1457268_at	Dot1l					1434354_at	Maob					1452398_at	Plce1	1426102_at	Cyp2j13					1434247_at	Ldhal6b											1416531_at	Gsto1	1449575_a_at	Gstp1
1435659_a_at	Tpi1	1447934_at	9630033F20Rik			1437172_x_at	Hadhb			1417125_at	Ahcy	1452173_at	Hadha	1451817_at	Suv420h1					1424182_at	Acat1					1453069_at	Pik3cb	1456231_at	Pla2g3					1426572_at	LOC100505264 /// Me2											1427552_a_at	Gstz1	1418186_at	Gstt1
1422070_at	Adh4	1439030_at	Gmppb			1424451_at	Acaa1b					1417650_at	Lao1	1424059_at	Suv420h2					1460167_at	Aldh7a1					1438019_at	Ippk	1429862_at	Pla2g4e					1429071_at	Me3											1419622_at	Ugt2b5	1417883_at	Gstt2
1418373_at	Pgam2					1448717_at	Gcdh					1448104_at	Aldh6a1	1450336_at	Setd1a					1425778_at	Ido2					1454605_a_at	Pi4k2a	1426064_at	Cyp3a44					1424109_a_at	Glo1											1422070_at	Adh4	1416531_at	Gsto1
1416069_at	Pfkp					1424352_at	Cyp4a12a					1424182_at	Acat1	1455668_at	Whsc1l1					1435314_at	Tph2					1454961_at	Synj1	1455457_at	Cyp2c54					1424182_at	Acat1											1424973_at	Cyp3a25	1427552_a_at	Gstz1
1436689_a_at	Aldh9a1					1439000_at	Acsbg2					1460167_at	Aldh7a1	1433495_at	Glt25d1					1455991_at	Ccbl2					1448104_at	Aldh6a1	1423244_at	Cyp2c68					1460167_at	Aldh7a1											1415897_a_at	Mgst1	1442676_at	Maoa
1448789_at	Aldh1a3					1428082_at	Acsl5					1451405_at	Pcca	1428555_at	Setd2					1448717_at	Gcdh					1439197_at	Pi4kb	1437893_at	Plb1					1426264_at	Dlat											1448789_at	Aldh1a3	1419622_at	Ugt2b5
1430124_x_at	Akr1a4					1440134_at	Cyp4a31					1456737_x_at	Acaa1a	1436120_at	Setdb2											1435068_at	Pip4k2b																			1450563_at	Mgst3	1422070_at	Adh4
1422479_at	Acss2											1433443_a_at	Hmgcs1	1437930_at	Glt25d2											1459983_at	Impa2																			1452301_at	Aldh3b1	1435459_at	Fmo2
1453283_at	Pgm1											1451512_s_at	Hibch	1448717_at	Gcdh											1422658_at	Plcz1																			1453708_a_at	Gsto2	1424973_at	Cyp3a25
1452301_at	Aldh3b1											1437172_x_at	Hadhb													1416388_at	Pip4k2c																			1419072_at	Gstm7	1419040_at	Cyp2d22
1448214_at	Pdhb											1424451_at	Acaa1b													1433941_at	Inpp5j																			1453487_at	Dhdh	1415897_a_at	Mgst1
1416617_at	Acss1											1433855_at	Abat													1433605_at	Inpp5a																			1424934_at	Ugt2b1	1448789_at	Aldh1a3
1437848_x_at	Adpgk																									1426733_at	Itpk1																			1419582_at	Cyp2c55	1450563_at	Mgst3
1437240_at	Pgm2																									1435003_at	Pi4ka																			1450133_at	Ugt2a3	1452301_at	Aldh3b1
1451260_at	Aldh1b1																									1425580_a_at	Pik3c3																			1429994_s_at	Cyp2c65	1453708_a_at	Gsto2
1425615_a_at	Pck2																									1427900_at	Pip5kl1																			1428283_at	Cyp2s1	1419072_at	Gstm7
1425303_at	Gck																									1424037_at	Itpka																			1452823_at	Gstk1	1424934_at	Ugt2b1
1434247_at	Ldhal6b																									1457359_at	Inpp4b																			1427960_at	Ugt2b34	1419582_at	Cyp2c55
1460167_at	Aldh7a1																									1426926_at	Plcg2																			1418653_at	Cyp2c50	1450133_at	Ugt2a3
1435490_at	Hk3																									1436616_at	Inpp4a																			1452592_at	Mgst2	1429994_s_at	Cyp2c65
1451194_at	Aldob																									1435272_at	Itpkb																			1424273_at	Cyp2c70	1452823_at	Gstk1
1426264_at	Dlat																									1438396_at	Ocrl																			1424576_s_at	Cyp2c44	1448683_at	Cyp2d26
1452583_s_at	Galm																																													1455595_at	Ugt2b36	1427960_at	Ugt2b34
																																														1426064_at	Cyp3a44	1418653_at	Cyp2c50
																																														1455457_at	Cyp2c54	1434354_at	Maob
																																																1452592_at	Mgst2
																																																1424273_at	Cyp2c70
																																																1424576_s_at	Cyp2c44
																																																1425799_at	Fmo4
																																																1455595_at	Ugt2b36
																																																1426064_at	Cyp3a44
																																																1455457_at	Cyp2c54
																																																1423244_at	Cyp2c68



[truncated: 50 more columns]

## Sheet: 48down
00020: Citrate cycle (TCA cycle)(30)		00030: Pentose phosphate pathway(25)		00040: Pentose and glucuronate interconversions(19)		00052: Galactose metabolism(27)		00100: Steroid biosynthesis(18)		00120: Primary bile acid biosynthesis(15)		00140: Steroid hormone biosynthesis(41)		00230: Purine metabolism(152)		00250: Alanine, aspartate and glutamate metabolism(32)		00290: Valine, leucine and isoleucine biosynthesis(11)		00500: Starch and sucrose metabolism(32)		00510: N-Glycan biosynthesis(49)		00512: Mucin type O-Glycan biosynthesis(25)		00514: Other types of O-glycan biosynthesis(32)		00532: Glycosaminoglycan biosynthesis - chondroitin sulfate(21)		00534: Glycosaminoglycan biosynthesis - heparan sulfate(24)		00561: Glycerolipid metabolism(51)		00590: Arachidonic acid metabolism(77)		00604: Glycosphingolipid biosynthesis - ganglio series(15)		00630: Glyoxylate and dicarboxylate metabolism(18)		00650: Butanoate metabolism(27)		00860: Porphyrin and chlorophyll metabolism(28)		00900: Terpenoid backbone biosynthesis(13)		00910: Nitrogen metabolism(22)		00970: Aminoacyl-tRNA biosynthesis(41)
ID	Gene Symbol	ID	Gene Symbol	ID	Gene Symbol	ID	Gene Symbol	ID	Gene Symbol	ID	Gene Symbol	ID	Gene Symbol	ID	Gene Symbol	ID	Gene Symbol	ID	Gene Symbol	ID	Gene Symbol	ID	Gene Symbol	ID	Gene Symbol	ID	Gene Symbol	ID	Gene Symbol	ID	Gene Symbol	ID	Gene Symbol	ID	Gene Symbol	ID	Gene Symbol	ID	Gene Symbol	ID	Gene Symbol	ID	Gene Symbol	ID	Gene Symbol	ID	Gene Symbol	ID	Gene Symbol
1423644_at	Aco1	1451461_a_at	Aldoc	1416468_at	Aldh1a1	1418248_at	Gla	1417257_at	Cel	1419001_at	Baat	1449183_at	Comt1	1417976_at	Ada	1418472_at	Aspa	1450871_a_at	Bcat1	1417765_a_at	Amy1	1418528_a_at	Dad1	1423237_at	Galnt1	1450834_at	Fut4	1460322_at	Chst3	1458054_at	Ext1	1418248_at	Gla	1422699_at	Alox12	1423621_a_at	Slc33a1	1423644_at	Aco1	1460216_at	Acads	1455282_x_at	Alas1	1419506_at	Ggps1	1427482_a_at	Car8	1438510_a_at	Hars
1451002_at	Aco2	1449088_at	Fbp2	1434988_x_at	Aldh2	1448319_at	Akr1b3	1427372_at	Cyp27b1	1449227_at	Ch25h	1439947_at	Cyp11a1	1418128_at	Adcy6	1418372_at	Adsl	1425764_a_at	Bcat2	1417880_at	G6pc	1420179_at	Ddost	1417588_at	Galnt3	1420756_at	Fut7	1428902_at	Chst11	1460170_at	Ext2	1416468_at	Aldh1a1	1426039_a_at	Alox12e	1416205_at	Glb1	1451002_at	Aco2	1416561_at	Gad1	1451675_a_at	Alas2	1427229_at	Hmgcr	1416193_at	Car1	1452000_s_at	Sars
1422578_at	Cs	1448470_at	Fbp1	1415776_at	Aldh3a2	1423556_at	Akr1b7	1450646_at	Cyp51	1417709_at	Cyp46a1	1450574_at	Cyp11b2	1456307_s_at	Adcy7	1449383_at	Adssl1	1418560_at	Pdha1	1436849_x_at	Gaa	1448549_a_at	Dpagt1	1455915_at	Galnt4	1450771_at	Fut9	1448477_at	Chst12	1423450_a_at	Hs3st1	1434988_x_at	Aldh2	1418266_at	Alox12b	1418655_at	B4galnt1	1422578_at	Cs	1421978_at	Gad2	1448734_at	Cp	1423858_a_at	Hmgcs2	1448752_at	Car2	1448472_at	Vars
1433263_at	Dld	1422326_at	G6pd2	1448319_at	Akr1b3	1416205_at	Glb1	1448619_at	Dhcr7	1422100_at	Cyp7a1	1417017_at	Cyp17a1	1418754_at	Adcy8	1460726_at	Adss	1450962_at	Pdha2	1434814_x_at	Gpi1	1419353_at	Dpm1	1460431_at	Gcnt1	1418014_a_at	B4galt1	1449402_at	Chst7	1435622_at	Hs3st3a1	1415776_at	Aldh3a2	1420338_at	Alox15	1449024_a_at	Hexa	1420420_at	Hao1	1455972_x_at	Hadh	1440747_at	Cpox	1418052_at	Mvk	1430584_s_at	Car3	1437832_x_at	Wars
1424828_a_at	Fh1	1448354_at	G6pdx	1423556_at	Akr1b7	1448894_at	Akr1b8	1416667_at	Ebp	1421075_s_at	Cyp7b1	1449920_at	Cyp19a1	1434454_at	Adcy9	1418833_at	Agxt	1448472_at	Vars	1416737_at	Gys1	1415675_at	Dpm2	1441216_at	St3gal1	1420643_at	Lfng	1453462_at	Chst13	1460436_at	Ndst1	1448319_at	Akr1b3	1425376_at	Alox8	1437874_s_at	Hexb	1433984_a_at	Mdh2	1424639_a_at	Hmgcl	1418699_s_at	Fech	1431893_a_at	Pdss1	1448949_at	Car4	1430986_at	Farsb
1422433_s_at	Idh1	1434814_x_at	Gpi1	1448894_at	Akr1b8	1417880_at	G6pc	1438322_x_at	Fdft1	1449309_at	Cyp8b1	1422217_a_at	Cyp1a1	1446675_at	Adk	1416239_at	Ass1	1448214_at	Pdhb	1437974_a_at	Hk1	1415787_at	Ganab	1421892_at	St3gal2	1416992_at	Mfng	1426866_at	Chst14	1417931_at	Ndst2	1423556_at	Akr1b7	1441962_at	Alox5	1441216_at	St3gal1	1436834_x_at	Mdh1	1423858_a_at	Hmgcs2	1448771_a_at	Fth1	1450654_a_at	Dhdds	1419525_at	Car5a	1452394_at	Cars
1416788_a_at	Idh3g	1450269_a_at	Pfkl	1416308_at	Ugdh	1436849_x_at	Gaa	1457248_x_at	Hsd17b7	1417369_at	Hsd17b4	1416612_at	Cyp1b1	1418372_at	Adsl	1437612_at		1434349_at	Vars2	1422612_at	Hk2	1418014_a_at	B4galt1	1421517_at	St6galnac1	1460704_at	Rfng	1416960_at	B3gat3	1450730_at	Hs2st1	1417257_at	Cel	1460196_at	Cbr1	1421892_at	St3gal2	1416838_at	Mut	1418560_at	Pdha1	1420890_at	Hccs	1427893_a_at	Pmvk	1421001_a_at	Car6	1440063_at
1433984_a_at	Mdh2	1416780_at	Pfkm	1419622_at	Ugt2b5	1450187_a_at	Galt	1423141_at	Lipa	1417208_at	Amacr	1422333_at	Cyp21a1	1449383_at	Adssl1	1416561_at	Gad1	1439225_at	Lars2	1419276_at	Enpp1	1450841_at	Stt3a	1433617_s_at	B4galt5	1420928_at	St6gal1	1454023_a_at	Chpf	1417293_at	Hs6st1	1418578_at	Dgka	1418509_at	Cbr2	1420903_at	St6galnac3	1418654_at	Hao2	1450962_at	Pdha2	1436930_x_at	Gm6453 /// Hmbs	1444085_at	Pdss2	1443824_s_at	Car7	1451471_at	Ears2
1436834_x_at	Mdh1	1416052_at	Prps1	1419456_at	Dcxr	1418014_a_at	B4galt1	1426913_at		1449686_s_at	Scp2	1416809_at	Cyp3a11	1460726_at	Adss	1421978_at	Gad2	1452154_at	Iars	1448602_at	Pygm	1417110_at	Man1a	1416655_at	C1galt1c1	1450406_a_at	St3gal3	1425316_at	B3gat1	1446257_at	Hs6st2	1418295_s_at	Dgat1	1422257_s_at	Cyp2b10	1418075_at	St6galnac4	1450969_at	Pccb	1425559_a_at	Acsm3	1448239_at	Hmox1	1423418_at	Fdps	1426236_a_at	Glul	1434349_at	Vars2
1451274_at	Ogdh	1418337_at	Rpia	1416795_at	Cryl1	1417177_at	Galk1	1416222_at	Nsdhl	1449112_at	Slc27a5	1419523_at	Cyp3a13	1422184_a_at	Ak1	1449268_at	Gfpt1	1448403_at	Lars	1416308_at	Ugdh	1420977_at	Man1a2	1417641_at	Galntl5	1419622_at	Ugt2b5	1426514_at	Chst15	1421599_at	Hs6st3	1448894_at	Akr1b8	1449479_at	Cyp2b13	1455695_at	St8sia1	1452919_a_at	Pgp	1418272_at	Oxct2a	1416399_a_at	Hmox2	1424182_at	Acat1	1434657_at	Gls	1457005_at	Mtfmt
1439617_s_at	Pck1	1425129_a_at	Taldo1	1453487_at	Dhdh	1437974_a_at	Hk1	1448068_at	Soat1	1418780_at	Cyp39a1	1421741_at	Cyp3a16	1448451_at	Ak2	1418753_at	Gfpt2	1426735_at	Iars2	1419622_at	Ugt2b5	1448647_at	Man2a1	1453630_at	Galnt14	1415901_at	Plod3	1424431_at	Csgalnact2	1434703_at	Extl3	1416694_at	Gk2	1419731_at	Cyp2b19	1449198_a_at	St3gal5	1425201_a_at	Hyi	1428140_at	Oxct1	1424877_a_at	Alad	1417303_at	Mvd	1416209_at	Glud1	1431354_a_at	Fars2
AFFX-PyruCarbMur/L09192_3_at	Pcx	1451015_at	Tkt	1424934_at	Ugt2b1	1422612_at	Hk2	1415993_at	Sqle	1420673_a_at	Acox2	1422100_at	Cyp7a1	1421831_at	Ak4	1426236_a_at	Glul			1449430_a_at	Treh	1423609_a_at	Mgat1	1424901_at	Gcnt3	1418080_at	B4galt2 /// Ccdc24	1441554_at	Chsy3	1433977_at	Hs3st3b1	1425834_a_at	Gpam	1419590_at	Cyp2b9	1419420_at	St6galnac5	1428885_at	Afmid	1448214_at	Pdhb	1441862_at	Ppox	1433443_a_at	Hmgcs1	1418645_at	Hal	1430134_a_at	Yars2
1418560_at	Pdha1	1416069_at	Pfkp	1450133_at	Ugt2a3	1418363_at	Lalba	1423078_a_at	Sc4mol	1416968_a_at	Hsd3b7	1421075_s_at	Cyp7b1	1422573_at	Ampd3	1434657_at	Gls			1453283_at	Pgm1	1428801_at	Mgat3	1429236_at	Galntl2	1449435_at	B4galt3	1452170_at	Chpf2	1423305_at	Extl1	1422704_at	Gyk	1417651_at	Cyp2c29	1423115_at	St6galnac6	1449400_at	Csl	1453011_at	Bdh2	1419622_at	Ugt2b5	1451122_at	Idi1	1450725_s_at	Car14	1452866_at	Nars
1450962_at	Pdha2	1417722_at	Pgls	1451260_at	Aldh1b1	1450269_a_at	Pfkl	1460684_at	Tm7sf2	1457665_x_at	Cyp27a1	1454987_a_at	H2-Ke6	1451703_s_at	Aprt	1416209_at	Glud1			1426275_a_at	Uxs1	1418896_a_at	Rpn2	1450745_at	C1galt1	1426618_a_at	Pomgnt1	1440340_at	B3galt6	1422538_at	Extl2	1419560_at	Lipc	1419094_at	Cyp2c37	1419138_at	B3galt4	1438477_a_at	Mcee	1452257_at	Bdh1	1443849_x_at	Urod			1451095_at	Asns	1429279_at	Wars2
1430402_at	Sucla2	1453283_at	Pgm1	1427960_at	Ugt2b34	1416780_at	Pfkm	1418129_at	Dhcr24	1455100_at	Akr1d1	1449038_at	Hsd11b1	1423326_at	Entpd1	1450970_at	Got1			1438774_s_at	Pgm2l1	1420928_at	St6gal1	1452182_at	Galnt2	1424934_at	Ugt2b1	1455795_at	Dse	1431452_at	Ndst4	1450188_s_at	Lipg	1452501_at	Cyp2c38	1421735_a_at	St8sia5	1417772_at	Grhpr	1448382_at	Ehhadh	1423482_at	Uros			1419705_at	Car5b	1419158_a_at	Hars2
1427441_a_at	Suclg2	1424840_at	Rbks	1426706_s_at	Xylb	1418080_at	B4galt2 /// Ccdc24	1460722_at	Soat2			1416761_at	Hsd11b2	1418259_a_at	Entpd2	1417716_at	Got2			1424934_at	Ugt2b1	1418080_at	B4galt2 /// Ccdc24	1452232_at	Galnt7	1450133_at	Ugt2a3	1452515_a_at	Xylt2	1416960_at	B3gat3	1415904_at	Lpl	1421363_at	Cyp2c39			1424182_at	Acat1	1423797_at	Aacs	1451471_at	Ears2			1421307_at	Car13	1431125_a_at	Tars2
1415891_at	Suclg1	1437240_at	Pgm2	1430332_a_at	Gusb	1416069_at	Pfkp	1434520_at	Sc5d			1449392_at	Hsd17b1	1460433_at	Entpd6	1451095_at	Asns			1450133_at	Ugt2a3	1456367_at	Fut8	1416760_at	Galntl1	1435056_x_at	Pofut2	1426304_x_at	B4galt7	1425316_at	B3gat1	1415777_at	Pnliprp1	1415994_at	Cyp2e1			1451405_at	Pcca	1417085_at	Akr1c6	1421347_at	Ftmt			1447762_x_at	Car12	1431778_at	Cars2
1435986_x_at	Sdhc	1430434_at	Tktl2	1434486_x_at	Ugp2	1453283_at	Pgm1	1444138_at	Cyp2r1			1418352_at	Hsd17b2	1451765_a_at	Entpd5	1418763_at	Nit2			1437240_at	Pgm2	1421059_a_at	Alg2	1418194_at	Galnt10	1426620_at	Chst10	1452366_at	Csgalnact1	1453777_a_at	Ndst3	1437438_x_at	Pnliprp2	1417531_at	Cyp2j5			1424995_at	Glyctk	1452341_at	Echs1	1435380_at	Cox10			1449234_at	Car15 /// Dgcr2	1448522_at	Sars2
1428235_at	Sdhd	1453203_at	Prps1l1	1455595_at	Ugt2b36	1455798_at	Galk2					1421671_at	Hsd17b3	1439012_a_at	Dck	1452830_s_at	Cad			1420654_a_at	Gbe1	1428072_a_at	Dolpp1	1434399_at	Galnt6	1424284_at	Pomt1	1434316_at	Chsy1	1428374_at	Glce	1422620_s_at	Ppap2a	1417952_at	Cyp2j6					1452173_at	Hadha	1424934_at	Ugt2b1			1426243_at	Cth	1423712_a_at	Qars
1426689_s_at	Sdha	1420064_s_at	Tktl1			1437240_at	Pgm2					1457248_x_at	Hsd17b7	1425893_a_at	Fhit	1451650_at	Ddo			1436385_at	Ganc	1449435_at	B4galt3	1437760_at	Galnt12	1427960_at	Ugt2b34	1442991_at	B3gat2	1440340_at	B3galt6	1450391_a_at	Mgll	1423257_at	Cyp4a14					1424182_at	Acat1	1450133_at	Ugt2a3			1435245_at	Gls2	1439225_at	Lars2
1418005_at	Sdhb	1452145_at	H6pd			1424140_at	Gale					1448453_at	Hsd3b1	1424436_at	Gart	1448539_a_at	Acy3			1431032_at	Agl	1422489_at	Mogs	1424748_at	Galnt11	1460631_at	Ogt	1458897_at	Ust	1438624_x_at	Hs3st2	1433819_s_at	Agpat3	1448499_a_at	Ephx2					1418668_at	Acsm1	1452467_at	Mmab			1455540_at	Cps1	1416312_at	Rars
1432016_a_at	Idh3a	1436771_x_at	Pgd			1436385_at	Ganc					1425127_at	Hsd3b2	1422868_s_at	Gda	1426502_s_at	Gpt			1427960_at	Ugt2b34	1424160_at	Alg5	1454780_at	Galntl4	1443881_at	Pofut1			1452515_a_at	Xylt2	1451210_at	Ppap2c	1448485_at	Ggt1					1433443_a_at	Hmgcs1	1427960_at	Ugt2b34			1427013_at	Car9	1452154_at	Iars
1448214_at	Pdhb	1454843_at	Prps2			1425303_at	Gck					1420531_at	Hsd3b5	1436370_at	Gucy2c	1417650_at	Lao1			1425303_at	Gck	1419114_at	Alg14	1442272_at	Galntl6	1433644_at	Pomt2			1426304_x_at	B4galt7	1421025_at	Agpat1	1460671_at	Gpx1					1453065_at	Aldh5a1	1452157_at	Eprs					1448403_at	Lars
1449400_at	Csl	1451194_at	Aldob			1435490_at	Hk3					1420447_at	Sult1e1	1422193_at	Gucy2e	1455007_s_at	Gpt2			1430332_a_at	Gusb	1422096_at	4933434I20Rik	1439899_at	Galnt13	1434876_at	Gxylt1			1442991_at	B3gat2	1423000_a_at	Dgke	1449279_at	Gpx2					1424858_at	L2hgdh	1428580_at	Blvra					1460638_at	Yars
1425615_a_at	Pck2	1424047_at	Dera			1434486_x_at	Ugp2					1421500_at	Sts	1416395_at	Guk1	1448350_at	Asl			1433504_at	Pygb	1421178_at	Mgat4c	1456680_at	B3gnt6	1426535_at	Poglut1					1436689_a_at	Aldh9a1	1449106_at	Gpx3					1456190_a_at	Acsm2	1430332_a_at	Gusb					1452157_at	Eprs
1423710_at	Dlst					1439479_at	Lct					1419622_at	Ugt2b5	1448736_a_at	Hprt	1452375_at	Aldh4a1			1417741_at	Pygl	1418681_at	Alg13			1455595_at	Ugt2b36					1430124_x_at	Akr1a4	1420698_at	Gpx5					1433855_at	Abat	1437982_x_at	Cox15					1424209_at	Rars2
1451666_at	Acly					1456777_at	Mgam					1449385_at	Hsd17b6	1442353_at	Itpa	1453065_at	Aldh5a1			1427302_at	Enpp3	1426343_at	Stt3b			1444302_at	Gxylt2					1425029_a_at	Mboat2	1434790_a_at	Lta4h					1437662_at	Acsm5	1455595_at	Ugt2b36					1460323_at	Tars
1418885_a_at	Idh3b											1417335_at	Sult2b1	1435277_x_at	Nme1	1435245_at	Gls2			1435490_at	Hk3	1452729_at	Dpm3			1433495_at	Glt25d1					1428821_at	Agpat2	1419692_a_at	Ltc4s							1451386_at	Blvrb					1435161_at	Sepsecs
1426264_at	Dlat											1450011_at	Hsd17b12	1448808_a_at	Nme2	1455540_at	Cps1			1434486_x_at	Ugp2	1421662_a_at	Tusc3			1434819_at	St6gal2					1416040_at	Lipf	1437015_x_at	Pla2g1b													1436777_at	Mars2
1450048_a_at	Idh2											1424973_at	Cyp3a25	1449160_at	Npr1	1452831_s_at	Ppat			1455595_at	Ugt2b36	1418844_at	Alg9			1434531_at	Mgat5b					1422678_at	Dgat2	1450128_at	Pla2g2a													1455953_x_at	Pstk
												1423573_at	Srd5a3	1449298_a_at	Pde1a	1435838_at	Agxt2			1424815_at	Gys2	1424720_at	Mgat4b			1437930_at	Glt25d2					1429514_at	Ppap2b	1420584_at	Pla2g2c													1455951_at	Mars
												1424934_at	Ugt2b1	1449420_at	Pde1b	1433855_at	Abat			1456777_at	Mgam	1439257_x_at	Rpn1			1457043_at	B3galtl					1428336_at	Agpat4	1418987_at	Pla2g2d													1436017_at	Aars2
												1450133_at	Ugt2a3	1444386_at	Pde1c							1425744_a_at	Mgat5									1433431_at	Pnlip	1448558_a_at	Pla2g4a													1423800_at	Dars
												1454649_at	Srd5a1	1433694_at	Pde3b							1435203_at	Man2a2									1431655_a_at	Agk	1417814_at	Pla2g5													1433838_at	Dars2
												1422960_at	Srd5a2	1421535_a_at	Pde4a							1439976_at	Alg11									1451260_at	Aldh1b1	1423860_at	Ptgds													1424282_at	Pet112l
												1427960_at	Ugt2b34	1446577_at	Pde4b							1451368_at	Alg1									1450776_at	Agpat6	1448816_at	Ptgis													1427309_at	Pars2
												1419136_at	Akr1c18	1416843_at	Pde6d							1460742_at	Alg3									1452169_a_at	Dgkz	1436448_a_at	Ptgs1													1423685_at	Aars
												1456362_at	Cyp11b1	1450933_at	Pde7a							1452037_at	Mgat2									1431167_at	Dgkg	1417263_at	Ptgs2													1433839_at	Nars2
												1455100_at	Akr1d1	1418406_at	Pde8a							1427557_at	Alg12									1437000_at	Dgkq	1416827_at	Tbxas1													1434738_at	Tarsl2
												1455595_at	Ugt2b36	1449403_at	Pde9a							1452235_at	Man1b1									1460167_at	Aldh7a1	1439420_x_at	Ggt5													1423784_at	Gars
												1426064_at	Cyp3a44	1419740_at	Pde6b							1424366_at	Dolk									1420655_at	Pnpla3	1451502_at	Pla2g10													1426735_at	Iars2
														1425100_a_at	Pde6g							1436193_at	Man1c1									1456208_at	Gpat2	1420674_at	Pla2g2e
														1419276_at	Enpp1							1434819_at	St6gal2									1455361_at	Dgkb	1421325_at	Pla2g2f
														1417308_at	Pkm2							1434531_at	Mgat5b									1435323_a_at	Mboat1	1431277_at	Pla2g6
														1438711_at	Pklr							1435641_at	Mgat4a									1434690_at	Lclat1	1421492_at	Hpgds
														1416530_a_at	Pnp							1455455_at	Glt28d2									1425300_at	Dak	1439747_at	Ptges
														1419397_at	Pola1							1459337_at										1454655_at	Dgkd	1419559_at	Cyp4f14
														1448369_at	Pola2							1437879_at	Alg10b									1454799_at	Agpat9	1452026_a_at	Pla2g12a
														1448187_at	Pold1							1455887_at	Alg8									1424995_at	Glyctk	1417836_at	Gpx7
														1448277_at	Pold2																	1439986_at	Dgki	1424099_at	Gpx8
														1448650_a_at	Pole																	1457213_a_at	Dgkh	1419614_at	Pla2g12b
														1431440_at	Pole2																			1430173_x_at	Cyp4f16
														1449061_a_at	Prim1																			1453500_at	Cyp2u1
														1418035_a_at	Prim2																			1453587_at	Ggt6
														1416052_at	Prps1																			1419219_at	Cyp4f18
														1449648_s_at	Polr1c																			1419582_at	Cyp2c55
														1416126_at	Polr1b																			1429994_s_at	Cyp2c65
														1447320_x_at	Polr1d																			1424677_at	Cyp2j9
														1456066_a_at	Polr1a																			1452135_at	Gpx6
														1426242_at	Polr2a																			1453405_at	Pla2g4d
														1416341_at	Polr2c																			1417591_at	Ptges2
														1417720_at	Polr2j																			1440211_at	Cyp2j11-ps
														1415878_at	Rrm1																			1449316_at	Cyp4f15
														1434437_x_at	Rrm2																			1418653_at	Cyp2c50
														1422604_at	Uox																			1427912_at	Cbr3
														1451006_at	Xdh																			1418767_at	Cyp4f13
														1423239_at	Impdh1																			1451094_at	Ggt7
														1428547_at	Nt5e																			1424273_at	Cyp2c70
														1415890_at	Papss1																			1424576_s_at	Cyp2c44
														1434510_at	Papss2																			1426102_at	Cyp2j13
														1419389_at	Pde10a																			1456231_at	Pla2g3
														1425228_a_at	Dguok																			1424352_at	Cyp4a12a
														1450213_at	Pde7b																			1429862_at	Pla2g4e
														1417252_at	Nt5c																			1455457_at	Cyp2c54
														1448651_at	Nudt5																			1423244_at	Cyp2c68
														1420871_at	Gucy1b3																			1437893_at	Plb1
														1448574_at	Nme6																			1440134_at	Cyp4a31
														1431913_a_at	Pde3a
														1416798_a_at	Nme4
														1452743_at	Pole3
														1434141_at	Gucy1a3
														1435057_x_at	Polr1e
														1422517_a_at	Znrd1
														1448530_at	Gmpr
														1450987_a_at	2310004I24Rik
														1418737_at	Nudt2
														1458326_at	Polr2e
														1417779_at	2310079N02Rik
														1453283_at	Pgm1
														1423372_at	Pole4
														1456731_x_at	Polr3k
														1423564_a_at	Paics
														1424566_s_at	Polr3d
														1431761_at	Entpd4
														1449155_at	Polr3g
														1416270_at	Polr2g
														1426838_at	Pold3
														1424258_at	Polr2d
														1427885_at	Pold4
														1427402_at	Polr2f
														1451364_at	Polr3gl
														1428494_a_at	Polr2i
														1431999_at	Polr3f
														1452949_at	Polr3b
														1427715_a_at	Nt5c1b
														1444288_at	Pnpt1
														1429550_at	Entpd8
														1437240_at	Pgm2
														1428164_at	Nudt9
														1453256_at	Polr3c
														1453203_at	Prps1l1
														1422727_at	Nme5
														1433709_at	Cant1
														1425933_a_at	Nt5c2
														1455186_a_at	1190003J15Rik
														1450766_at	Pde6h
														1430781_at	Ak7
														1424227_at	Polr3h
														1432104_a_at	Allc
														1453767_a_at	Nt5m
														1418098_at	Adcy4
														1421960_at	Adcy3
														1429180_at	Gmpr2
														1451050_at	Nt5c3
														1452811_at	Atic
														1426757_at	Ampd2
														1454843_at	Prps2
														1450830_a_at	Pde6c
														1438874_at	Nme7
														1447707_s_at	Pde2a
														1427302_at	Enpp3
														1455462_at	Adcy2
														1434049_at	Entpd3
														1437989_at	Pde8b
														1434453_at	Polr3a
														1455296_at	Adcy5
														1450415_at	Pde6a
														1433567_at	Gmps
														1433281_at	Prune
														1434722_at	Ampd1
														1426339_at	Ak5
														1427191_at	Npr2
														1452831_s_at	Ppat
														1433552_a_at	Polr2b
														1429579_at	6330407I18Rik
														1455496_at	Pfas
														1435280_at	AI452195
														1454430_at	Pde11a
														1458341_x_at	Pde5a
														1439613_at	Adcy10
														1437476_at	Rrm2b
														1445359_at	Adcy1
[truncated: 176 more columns]
